# Supplementary material for: Palladium-catalyzed divergent cycloisomerization of 1,6-enynes controlled by functional groups for the synthesis of pyrroles, cyclopentenes, and tetrahydropyridines
Source: Royal Society of Chemistry journal article supplement (doi:10.1039/d1qo00581b), 2021-01-01

# Palladium-Catalyzed Divergent Cycloisomerization of 1,6-Enynes Controlled by Functional Groups for the Synthesis of Pyrroles, Cyclopentenes, and Tetrahydropyridines

Linglong Ding,<sup>a</sup> Yi-Hui Deng,<sup>c</sup> Tian-Yu Sun,<sup>b</sup> Dawei Wang,<sup>a</sup> Yun-Dong Wu<sup>b,c,\*</sup> and  
Xiao-Feng Xia<sup>a,\*</sup>

<sup>a</sup> Key Laboratory of Synthetic and Biological Colloids, Ministry of Education, School of Chemical and Material Engineering, Jiangnan University, Wuxi, Jiangsu, 214122, China. E-mail: [xiacf@jiangnan.edu.cn](mailto:xiacf@jiangnan.edu.cn)

<sup>b</sup> Shenzhen Bay Laboratory, Shenzhen, 518132, China. E-mail: [wuyd@pkusz.edu.cn](mailto:wuyd@pkusz.edu.cn)

<sup>c</sup> Lab of Computational Chemistry and Drug Design, State Key Laboratory of Chemical Oncogenomics, Peking University Shenzhen Graduate School, Shenzhen 518055, China.

| Table of Contents |                                                                                                       |                 |
|-------------------|-------------------------------------------------------------------------------------------------------|-----------------|
| <b>I</b>          | <b>General Remarks</b>                                                                                | <b>S2</b>       |
| <b>II</b>         | <b>Optimization conditions for the synthesis of products 6</b>                                        | <b>S2-4</b>     |
| <b>III</b>        | <b>General Procedure for the synthesis of products 2, 4, 6</b>                                        | <b>S4-5</b>     |
| <b>IV</b>         | <b>Deuterium labeling experiments and crossover experiment</b>                                        | <b>S5-S11</b>   |
| <b>V</b>          | <b>Further transformation of products 2 and 4</b>                                                     | <b>S11-12</b>   |
| <b>VI</b>         | <b>X-ray Crystal Diffraction Data for 2m, 4i, (E)-6a</b>                                              | <b>S12-15</b>   |
| <b>VII</b>        | <b>General Procedure for the synthesis of 5u-d1</b>                                                   | <b>S15-16</b>   |
| <b>VIII</b>       | <b>Data of products 2, 4, 6, 7, 8</b>                                                                 | <b>S16-S38</b>  |
| <b>IX</b>         | <b><sup>1</sup>H NMR, <sup>13</sup>C NMR and <sup>19</sup>F NMR spectra of compound 2, 4, 6, 7, 8</b> | <b>S39-S116</b> |

**I. General Remarks:** Column chromatography was carried out on silica gel. Unless noted  $^1\text{H}$  NMR spectra were recorded on 400 MHz in  $\text{CDCl}_3$ ,  $^{13}\text{C}$  NMR spectra were recorded on 100 MHz in  $\text{CDCl}_3$ ,  $^{19}\text{F}$  NMR spectra were recorded on 376 MHz in  $\text{CDCl}_3$ . IR spectra were recorded on an FT-IR spectrometer and only major peaks are reported in  $\text{cm}^{-1}$ . Melting points were determined on a microscopic apparatus and were uncorrected. All new products were further characterized by HRMS (high resolution mass spectra), high resolution mass spectrometry (HRMS) spectra was obtained on a microTOF-Q instrument equipped with an ESI source; copies of their  $^1\text{H}$  NMR and  $^{13}\text{C}$  NMR spectra are provided. All reagents were used as received unless otherwise stated. Glucose, D-Mannitol, Fructose, Sucrose,  $\text{B}_2\text{Pin}_2$ ,  $\text{Pd}(\text{tBu}_3\text{P})_2$ , and common used solvents were purchased from Sigma-Aldrich. All reagents or catalysts were directly used from purchased without further purification.

## II. Optimization conditions for the synthesis of products 6

**Table S1.** Screening of reaction conditions<sup>[a]</sup>

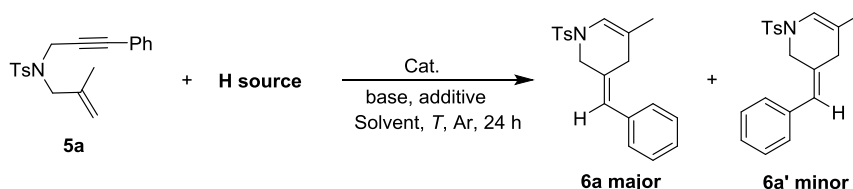

| Entry | Catalyst (mol%)                          | Solvent (mL)  | Base (equiv.)                 | H source (equiv.) | Additive (equiv.) | Yield(%) (E/Z) |
|-------|------------------------------------------|---------------|-------------------------------|-------------------|-------------------|----------------|
| 1     | $\text{Pd}(\text{tBu}_3\text{P})_2$ (10) | DCE (1.0)     | NaOAc (3.0)                   | Glucose (3.0)     |                   | 60 (1.2:1)     |
| 2     | $\text{Pd}(\text{tBu}_3\text{P})_2$ (10) | DCE (1.0)     | NaOAc (2.0)                   | Glucose (3.0)     |                   | <5             |
| 3     | $\text{Pd}(\text{tBu}_3\text{P})_2$ (10) | DCE (1.0)     | KOAc (3.0)                    | Glucose (3.0)     |                   | 58 (4.0:1)     |
| 4     | $\text{Pd}(\text{tBu}_3\text{P})_2$ (10) | DCE (1.0)     | NaOH (3.0)                    | Glucose (3.0)     |                   | <5             |
| 5     | $\text{Pd}(\text{tBu}_3\text{P})_2$ (10) | DCE (1.0)     | $\text{K}_2\text{CO}_3$ (3.0) | Glucose (3.0)     |                   | 15 (3.3:1)     |
| 6     | $\text{Pd}(\text{tBu}_3\text{P})_2$ (10) | DMF (1.0)     | NaOAc (3.0)                   | Glucose (3.0)     |                   | <5             |
| 7     | $\text{Pd}(\text{tBu}_3\text{P})_2$ (10) | Toluene (1.0) | NaOAc (3.0)                   | Glucose (3.0)     |                   | <5             |
| 8     | $\text{Pd}(\text{tBu}_3\text{P})_2$ (10) | PhCl (1.0)    | NaOAc (3.0)                   | Glucose (3.0)     |                   | <5             |
| 9     | $\text{Pd}(\text{tBu}_3\text{P})_2$ (10) | DCE (1.0)     | NaOAc (3.0)                   | Glucose (2.0)     |                   | <5             |
| 10    | $\text{Pd}(\text{tBu}_3\text{P})_2$ (10) | DCE (1.0)     | NaOAc (3.0)                   | Glucose (1.2)     |                   | 0              |
| 11    | $\text{Pd}(\text{tBu}_3\text{P})_2$ (10) | DCE (1.0)     | NaOAc (3.0)                   | Sucrose (3.0)     |                   | 58 (1.2:1)     |

|                      |                                                                         |                  |                    |                          |                                           |                   |
|----------------------|-------------------------------------------------------------------------|------------------|--------------------|--------------------------|-------------------------------------------|-------------------|
| 12                   | Pd( <i>t</i> Bu <sub>3</sub> P) <sub>2</sub><br>(10)                    | DCE (1.0)        | NaOAc (3.0)        | D-Mannitol<br>(3.0)      |                                           | 70.6 (2.0:1)      |
| 13                   | Pd( <i>t</i> Bu <sub>3</sub> P) <sub>2</sub><br>(10)/ X-phos<br>(12.5%) | DCE (1.0)        | NaOAc (3.0)        | Glucose<br>(3.0)         |                                           | 25 (1.8:1)        |
| 14                   | Pd( <i>t</i> Bu <sub>3</sub> P) <sub>2</sub><br>(10)/ Dppe<br>(12.5%)   | DCE (1.0)        | NaOAc (3.0)        | Glucose<br>(3.0)         |                                           | <5                |
| 15                   | Pd( <i>t</i> Bu <sub>3</sub> P) <sub>2</sub><br>(10)/ Dppp<br>(12.5%)   | DCE (1.0)        | NaOAc (3.0)        | Glucose<br>(3.0)         |                                           | <5                |
| 16                   | [RuCl <sub>2</sub> ( <i>p</i> -cym<br>ene)] <sub>2</sub> (5)            | DCE (1.0)        | NaOAc (3.0)        | Glucose<br>(3.0)         |                                           | 14 (2.0:1)        |
| 17                   | [Cp* <i>RhCl</i> ] <sub>2</sub><br>(5)                                  | DCE (1.0)        | NaOAc (3.0)        | Glucose<br>(3.0)         |                                           | <5                |
| <b>18</b>            | <b>Pd(<i>t</i>Bu<sub>3</sub>P)<sub>2</sub><br/>(10)</b>                 | <b>DCE (1.0)</b> | <b>NaOAc (3.0)</b> | <b>Glucose<br/>(3.0)</b> | <b>B<sub>2</sub>Pin<sub>2</sub> (2.0)</b> | <b>57 (1.2:1)</b> |
| <b>19</b>            | <b>Pd(<i>t</i>Bu<sub>3</sub>P)<sub>2</sub><br/>(10)</b>                 | <b>DCE (1.0)</b> | <b>NaOAc (4.0)</b> | <b>Glucose<br/>(4.0)</b> | <b>B<sub>2</sub>Pin<sub>2</sub> (2.0)</b> | <b>71 (1.4:1)</b> |
| <b>20</b>            | <b>Pd(<i>t</i>Bu<sub>3</sub>P)<sub>2</sub><br/>(10)</b>                 | <b>DCE (2.0)</b> | <b>NaOAc (3.0)</b> | <b>Glucose<br/>(3.0)</b> | <b>B<sub>2</sub>Pin<sub>2</sub> (2.0)</b> | <b>69 (2.6:1)</b> |
| 21                   | Pd( <i>t</i> Bu <sub>3</sub> P) <sub>2</sub><br>(10)                    | DCE (1.0)        | NaOAc (4.0)        | Glucose<br>(3.0)         | PhB(OH) <sub>2</sub><br>(4.0)             | 55 (1.6:1)        |
| 22                   | Pd( <i>t</i> Bu <sub>3</sub> P) <sub>2</sub><br>(10)                    | DCE (1.0)        | NaOAc (4.0)        | Glucose<br>(4.0)         | PhB(OH) <sub>2</sub><br>(4.0)             | 24 (3.0:1)        |
| 23                   | Pd( <i>t</i> Bu <sub>3</sub> P) <sub>2</sub><br>(10)                    | DCE (1.0)        | NaOAc (3.0)        | Glucose<br>(3.0)         | DIPEA                                     | <5                |
| 24 <sup>[b]</sup>    | Pd( <i>t</i> Bu <sub>3</sub> P) <sub>2</sub><br>(10)                    | DCE (1.0)        | NaOAc (3.0)        | Glucose<br>(3.0)         |                                           | 65 (1.2:1)        |
| 25 <sup>[b]</sup>    | Pd( <i>t</i> Bu <sub>3</sub> P) <sub>2</sub><br>(10)                    | DCE (2.0)        | NaOAc (3.0)        | Glucose<br>(3.0)         |                                           | 64 (3.0:1)        |
| 26 <sup>[b, c]</sup> | Pd( <i>t</i> Bu <sub>3</sub> P) <sub>2</sub><br>(10)                    | DCE (2.0)        | NaOAc (3.0)        | Glucose<br>(3.0)         |                                           | 63 (3.0:1)        |
| 27                   | Pd( <i>t</i> Bu <sub>3</sub> P) <sub>2</sub><br>(10)                    | DCE (1.0)        | NaOAc (3.0)        | Glucose<br>(4.0)         |                                           | 53 (1.6:1)        |
| 28 <sup>[d]</sup>    | Pd( <i>t</i> Bu <sub>3</sub> P) <sub>2</sub><br>(10)                    | DCE (1.0)        | NaOAc (3.0)        | Glucose<br>(3.0)         |                                           | 38 (1.6:1)        |
| 29 <sup>[d]</sup>    | Pd( <i>t</i> Bu <sub>3</sub> P) <sub>2</sub><br>(10)                    | DCE (1.5)        | NaOAc (3.0)        | Glucose<br>(3.0)         |                                           | 35 (2.0:1)        |
| 30                   | Pd( <i>t</i> Bu <sub>3</sub> P) <sub>2</sub><br>(10)                    | DCE (1.0)        | NaOAc (3.0)        | HCOOH<br>(3.0)           |                                           | 35 (1.4:1)        |
| 31                   | Pd( <i>t</i> Bu <sub>3</sub> P) <sub>2</sub><br>(10)                    | DCE (1.0)        | NaOAc (3.0)        | <i>i</i> PrOH (3.0)      |                                           | <5                |

[a] **5a** (0.1 mmol), H source (0.3 mmol), Pd(*t*Bu<sub>3</sub>P)<sub>2</sub> (10 mol%), NaOAc (0.3 mmol), DCE (1 mL),

at 115 °C for 24 h. [b] The reaction temperature is 130 °C. [c] 36 h. [d] The solvent is ultra-dry.

**Table S2.** Screening of H sources<sup>[a]</sup>

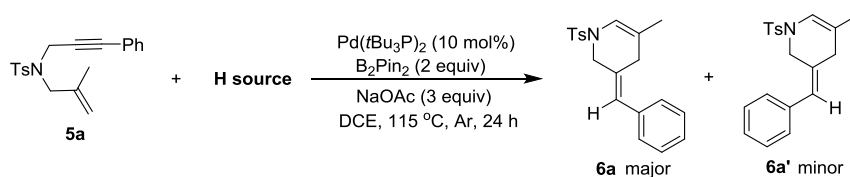

| Entry             | H source                           | pKa (25 °C) | Yield(%) (E/Z) |
|-------------------|------------------------------------|-------------|----------------|
| 1                 | H <sub>2</sub> O                   | 14 (15.7)   | 51 (1.5:1)     |
| 2                 | CH <sub>3</sub> CH <sub>2</sub> OH | 15.24±0.10  | 49 (1.1:1)     |
| 3                 | Glycerol                           | 13.68±0.20  | 50 (1.1:1)     |
| 4                 | CH <sub>3</sub> COOH               | 4.79±0.10   | 53 (1.25:1)    |
| 5                 | NH <sub>4</sub> Cl                 | 9.26±0.20   | 52 (1.3:1)     |
| 6                 | Glucose                            | 12.45±0.20  | 69 (2.6:1)     |
| 7                 | Gluconolactone                     | 12.13±0.70  | 67.6 (3.6:1)   |
| 8                 | D-Mannitol                         | 13.14±0.20  | 70.6 (2.0:1)   |
| 9                 | Fructose                           | 11.52±0.70  | 70 (3.1:1)     |
| 10 <sup>[b]</sup> | Sucrose                            | 12.81±0.70  | 58 (1.2:1)     |
| 11                | <i>i</i> PrOH                      | 15.31±0.20  | 53 (1.6:1)     |
| 12 <sup>[b]</sup> | HCOOH                              | 3.74±0.10   | 35 (1.4:1)     |

[a] **5a** (0.1 mmol), H source (0.3 mmol), B<sub>2</sub>Pin<sub>2</sub> (0.2 mmol), Pd(*t*Bu<sub>3</sub>P)<sub>2</sub> (10 mol%), NaOAc (0.3 mmol), DCE (2 mL), at 115 °C for 24 h. [b] Without B<sub>2</sub>Pin<sub>2</sub>.

### III General Procedure for the synthesis of products **2**, **4**, **6**

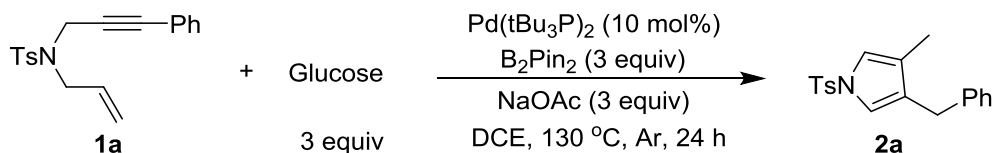

The mixture of N-allyl-4-methyl-N-(3-phenylprop-2-yn-1-yl)benzenesulfonamide **1a** (0.10 mmol) and Glucose (0.30 mmol), B<sub>2</sub>Pin<sub>2</sub> (0.30 mmol), Pd(*t*Bu<sub>3</sub>P)<sub>2</sub> (0.010 mmol), NaOAc (0.30 mmol) were combined in DCE (2.0 mL) at 130 °C for 24 h under argon atmosphere. After the reaction, 6 mL water was added to quench the reaction, and the resulting mixture was extracted twice with ethyl acetate (2×10 mL). The combined organic extracts were washed with brine (10 mL), dried over Na<sub>2</sub>SO<sub>4</sub> and concentrated. Purification of the crude product by flash column chromatography afforded the product (petroleum ether/ethyl acetate as eluent (20:1-10:1)).

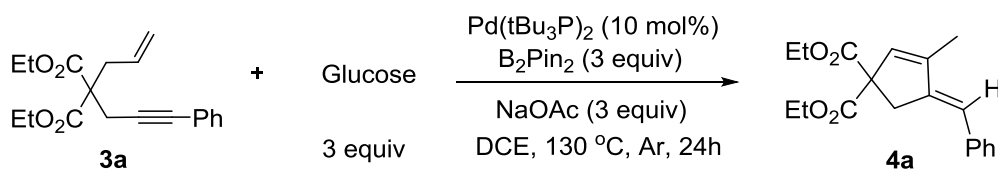

The mixture of diethyl 2-allyl-2-(3-phenylprop-2-yn-1-yl)malonate **3a** (0.10 mmol) and Glucose (0.30 mmol), B<sub>2</sub>Pin<sub>2</sub> (0.30 mmol), Pd(*t*Bu<sub>3</sub>P)<sub>2</sub> (0.010 mmol), NaOAc

(0.30 mmol) were combined in DCE (2.0 mL) at 130 °C for 24 h under argon atmosphere. After the reaction, 6 mL water was added to quench the reaction, and the resulting mixture was extracted twice with ethyl acetate (2×10 mL). The combined organic extracts were washed with brine (10 mL), dried over Na<sub>2</sub>SO<sub>4</sub> and concentrated. Purification of the crude product by flash column chromatography afforded the product (petroleum ether/ethyl acetate as eluent (20:1-10:1)).

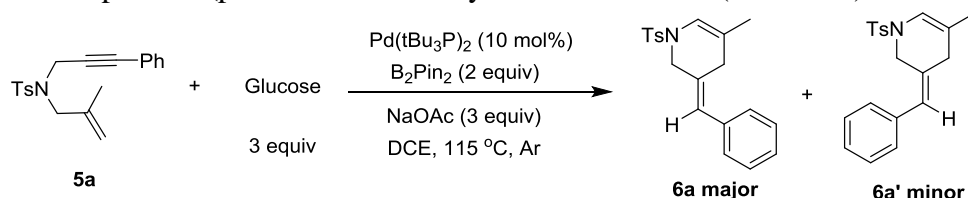

The mixture of 4-methyl-N-(2-methylallyl)-N-(3-phenylprop-2-yn-1-yl)-benzenesulfonamide **5a** (0.20 mmol) and Glucose (0.60 mmol), B<sub>2</sub>Pin<sub>2</sub> (0.40 mmol), Pd(*t*Bu<sub>3</sub>P)<sub>2</sub> (10 mol%), NaOAc (0.60 mmol) were combined in DCE (2.0 mL) at 115 °C for 24 h under argon atmosphere. After the reaction, 6 mL water was added to quench the reaction, and the resulting mixture was extracted twice with ethyl acetate (2×10 mL). The combined organic extracts were washed with brine (10 mL), dried over Na<sub>2</sub>SO<sub>4</sub> and concentrated. Purification of the crude product by flash column chromatography afforded the product (petroleum ether/ethyl acetate as eluent (20:1-10:1)).

#### IV. Deuterium labeling experiments and crossover experiment:

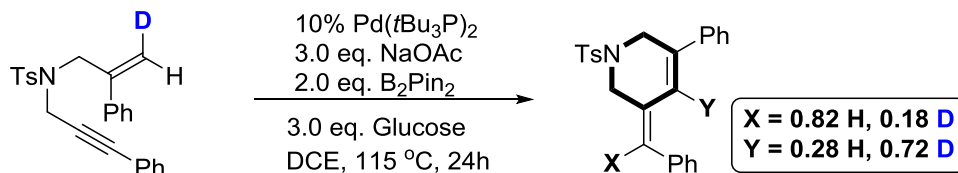

The mixture of (Z)-4-methyl-N-(2-phenylallyl-3-d)-N-(3-phenylprop-2-yn-1-yl)-benzenesulfonamide (0.20 mmol) and Glucose (0.30 mmol), B<sub>2</sub>Pin<sub>2</sub> (0.40 mmol), Pd(*t*Bu<sub>3</sub>P)<sub>2</sub> (0.020 mmol), NaOAc (0.60 mmol) were combined in DCE (3.0 mL) at 115 °C for 24 h under argon atmosphere. After the reaction, 6 mL water was added to quench the reaction, and the resulting mixture was extracted twice with ethyl acetate (2×10 mL). The combined organic extracts were washed with brine (10 mL), dried over Na<sub>2</sub>SO<sub>4</sub> and concentrated. Purification of the crude product by flash column chromatography afforded the product (petroleum ether/ethyl acetate as eluent (20:1-10:1)).



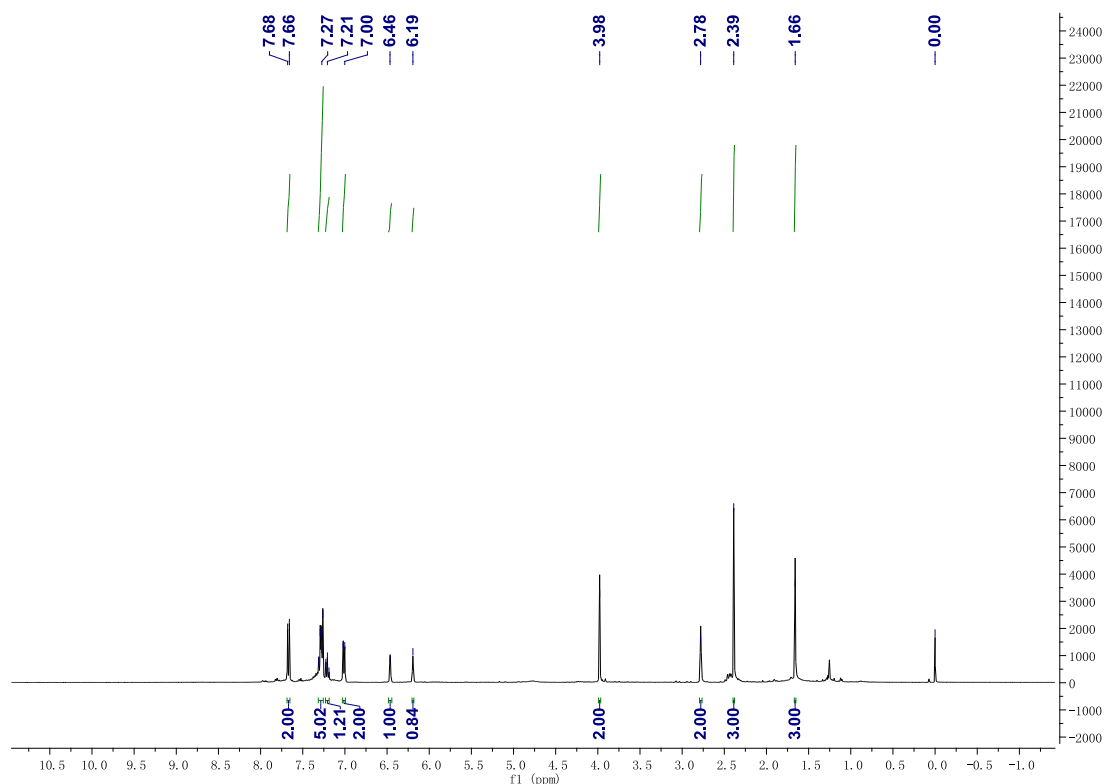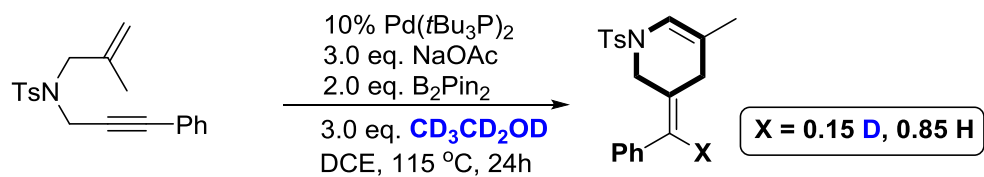

The mixture of 4-methyl-N-(2-methylallyl)-N-(3-phenylprop-2-yn-1-yl)-benzenesulfonamide (0.20 mmol) and  $C_2D_5OD$  (0.60 mmol),  $B_2Pin_2$  (0.40 mmol),  $Pd(tBu_3P)_2$  (0.020 mmol),  $NaOAc$  (0.60 mmol) were combined in DCE (3.0 mL) at 115 °C for 24 h under argon atmosphere. After the reaction, 6 mL water was added to quench the reaction, and the resulting mixture was extracted twice with ethyl acetate ( $2 \times 10$  mL). The combined organic extracts were washed with brine (10 mL), dried over  $Na_2SO_4$  and concentrated. Purification of the crude product by flash column chromatography afforded the product (petroleum ether/ethyl acetate as eluent (20:1-10:1)).

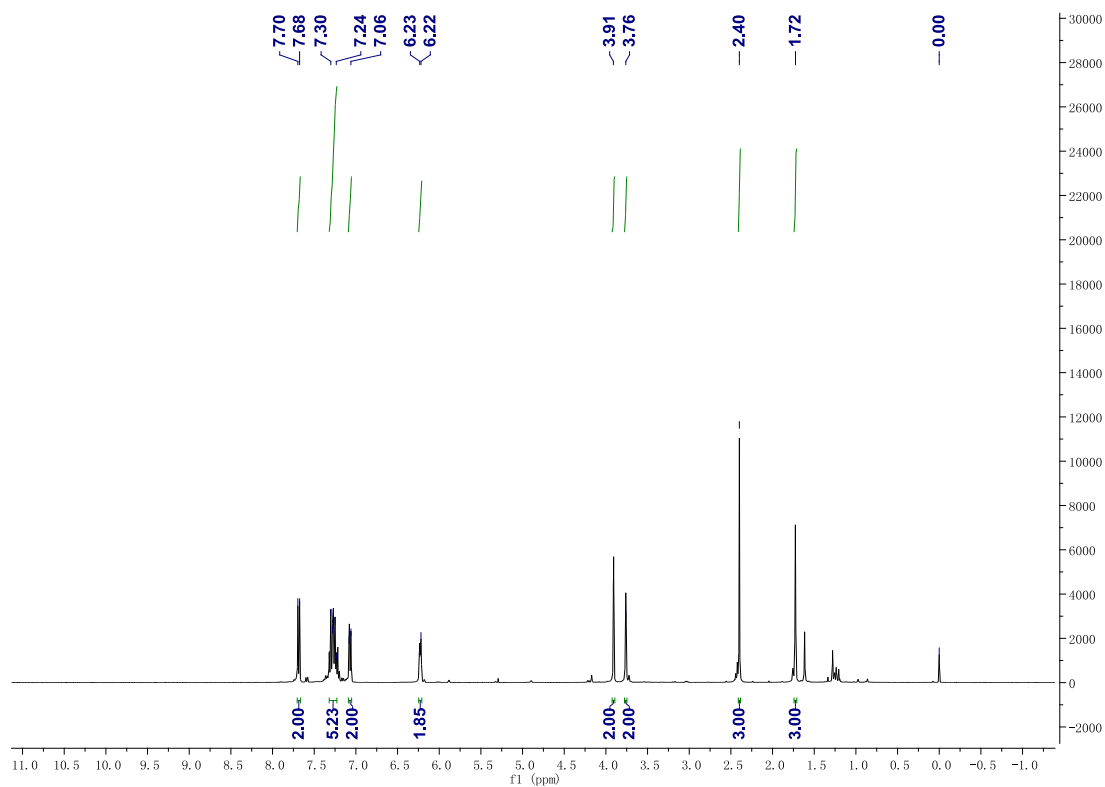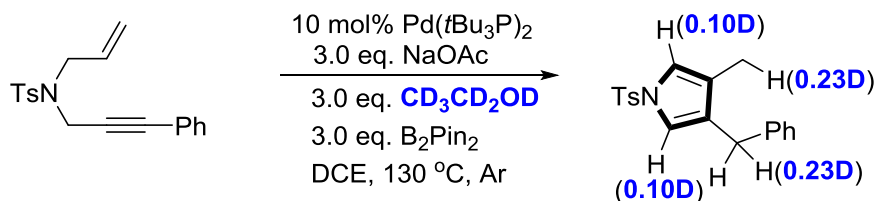

The mixture of N-allyl-4-methyl-N-(3-phenylprop-2-yn-1-yl)benzenesulfonamide (0.10 mmol) and  $\text{C}_2\text{D}_5\text{OD}$  (0.30 mmol),  $\text{B}_2\text{Pin}_2$  (0.30 mmol),  $\text{Pd}(t\text{Bu}_3\text{P})_2$  (0.010 mmol), NaOAc (0.30 mmol) were combined in DCE (2.0 mL) at 130 °C for 24 h under argon atmosphere. After the reaction, 6 mL water was added to quench the reaction, and the resulting mixture was extracted twice with ethyl acetate ( $2 \times 10$  mL). The combined organic extracts were washed with brine (10 mL), dried over  $\text{Na}_2\text{SO}_4$  and concentrated. Purification of the crude product by flash column chromatography afforded the product (petroleum ether/ethyl acetate as eluent (20:1-10:1)).



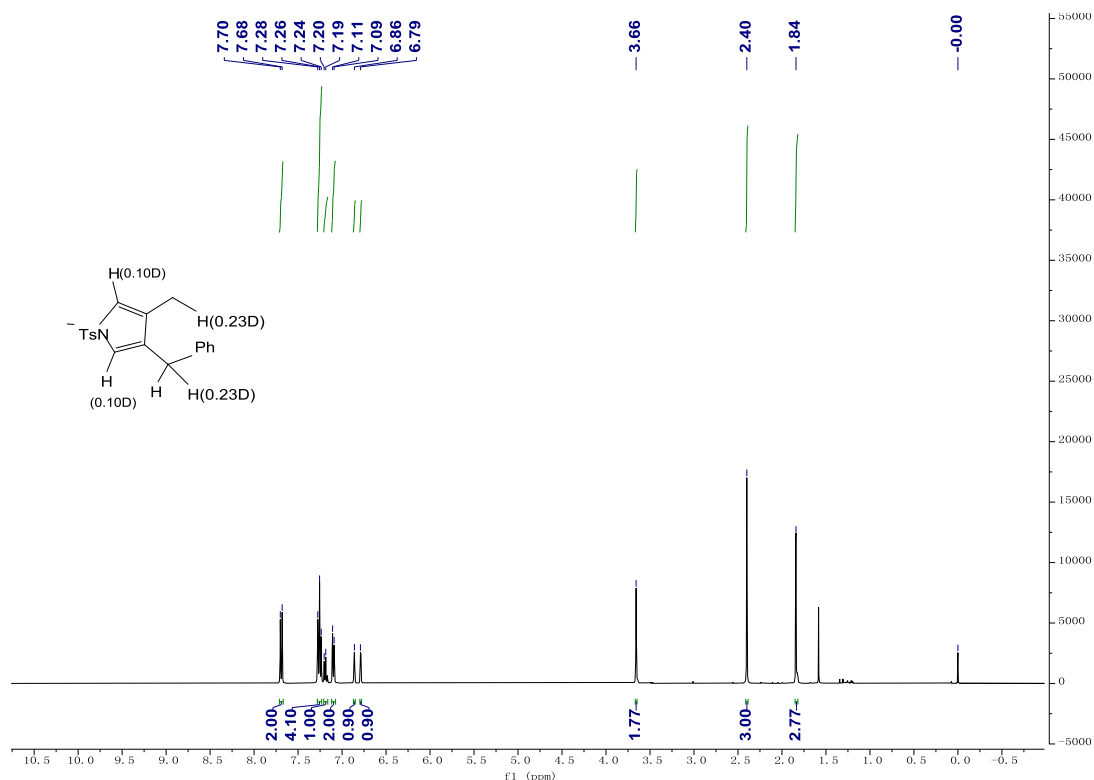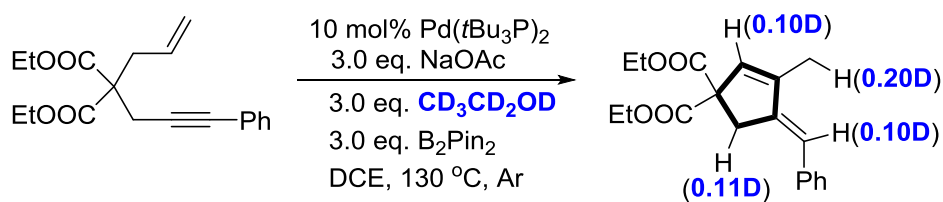

The mixture of diethyl 2-allyl-2-(3-phenylprop-2-yn-1-yl)malonate (0.10 mmol) and C<sub>2</sub>D<sub>5</sub>OD (0.30 mmol), B<sub>2</sub>Pin<sub>2</sub> (0.30 mmol), Pd(*t*Bu<sub>3</sub>P)<sub>2</sub> (0.010 mmol), NaOAc (0.30 mmol) were combined in DCE (2.0 mL) at 130 °C for 24 h under argon atmosphere. After the reaction, 6 mL water was added to quench the reaction, and the resulting mixture was extracted twice with ethyl acetate (2×10 mL). The combined organic extracts were washed with brine (10 mL), dried over Na<sub>2</sub>SO<sub>4</sub> and concentrated. Purification of the crude product by flash column chromatography afforded the product (petroleum ether/ethyl acetate as eluent (20:1-10:1)).

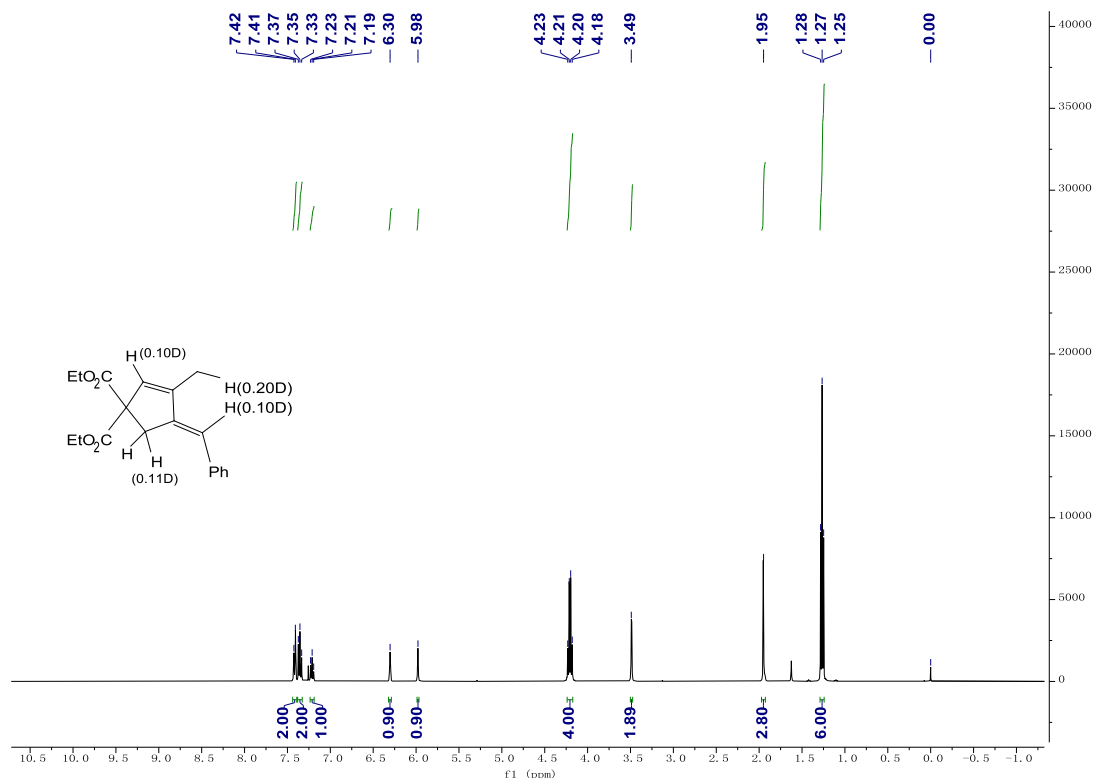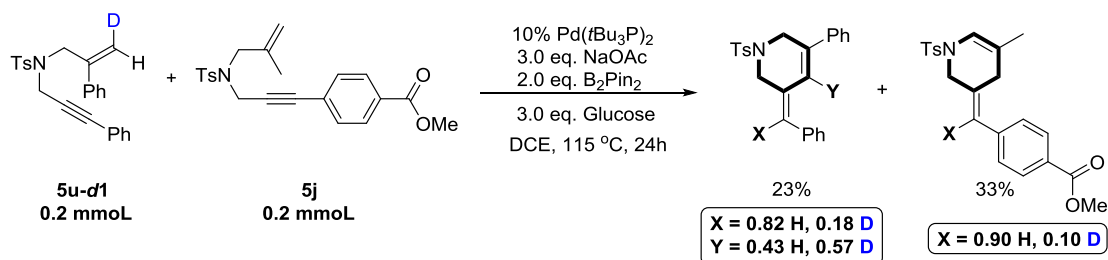

The mixture of **5u-d1** (0.20 mmol) and **5j** (0.20 mmol), Glucose (0.12 mmol), B<sub>2</sub>Pin<sub>2</sub> (0.80 mmol), Pd(*t*Bu<sub>3</sub>P)<sub>2</sub> (0.04 mmol), NaOAc (0.12 mmol) were combined in DCE (6.0 mL) at 115 °C for 24 h under argon atmosphere. After the reaction, 10 mL water was added to quench the reaction, and the resulting mixture was extracted twice with ethyl acetate (2×15 mL). The combined organic extracts were washed with brine (15mL), dried over Na<sub>2</sub>SO<sub>4</sub> and concentrated. Purification of the crude product by flash column chromatography afforded the product (petroleum ether/ethyl acetate as eluent (30:1-10:1)).

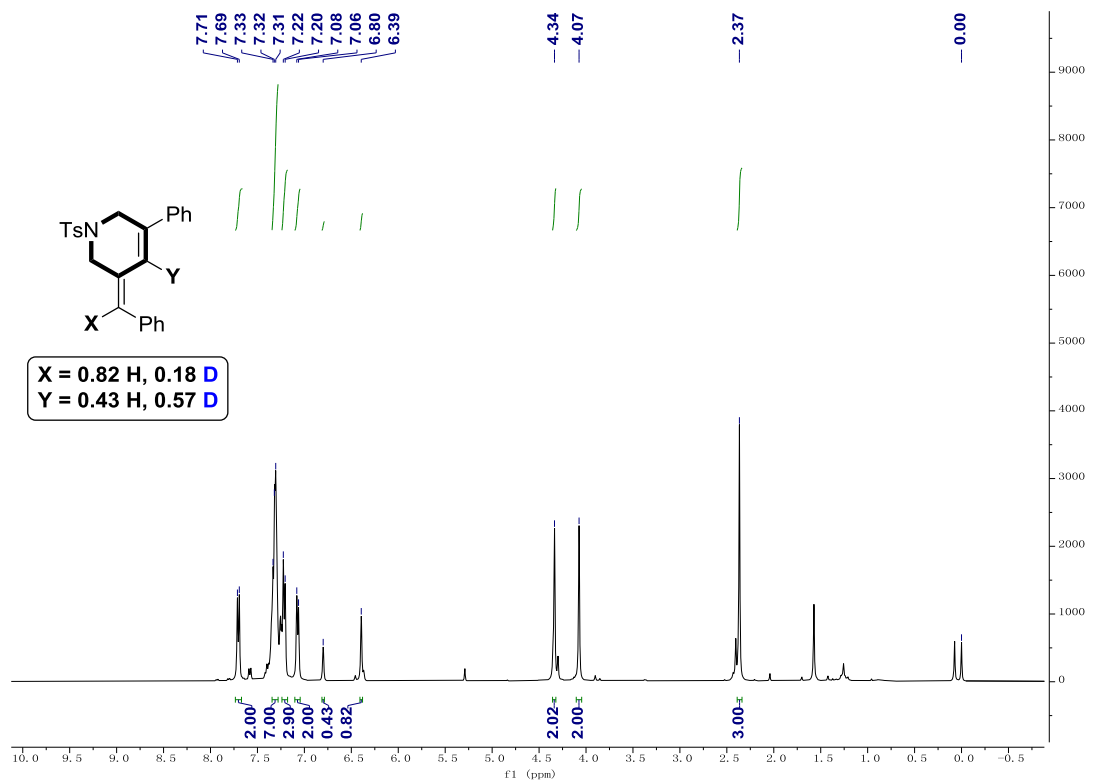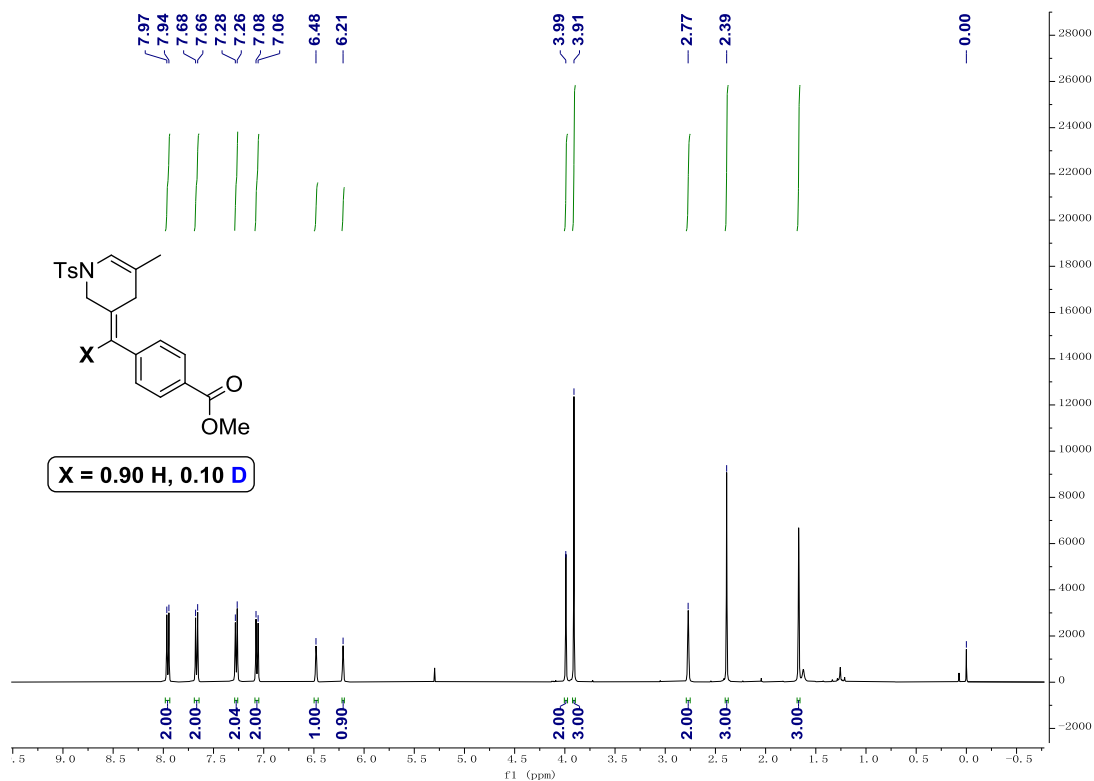

## V. Further transformation of products 2 and 4

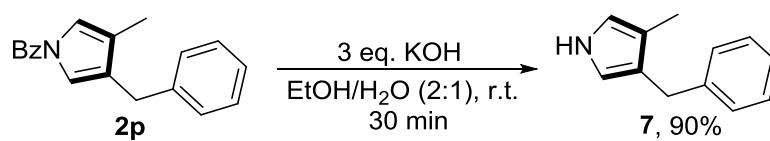

To a stirred of (3-benzyl-4-methyl-1H-pyrrol-1-yl)(phenyl)methanone (55.0 mg, 0.20

mmol) in EtOH (2.0 mL) and H<sub>2</sub>O (1.0 mL) was added KOH (33.6 mg, 0.60 mmol). The solution is stirred for 30 min at room temperature and monitored by thin layer chromatography. After consumption of the starting material, the reaction is then diluted with water (6 mL) and extracted with CH<sub>2</sub>Cl<sub>2</sub> (2×10 mL). The organic layer is washed with saturated aqueous NaHCO<sub>3</sub>, saturated aqueous brine, then dried over Na<sub>2</sub>SO<sub>4</sub> and concentrated. Purification by column chromatography on silica gel (petroleum ether/ethyl acetate =10:1) provided 3-benzyl-4-methyl-1H-pyrrole (31.0 mg, 90%) as a colorless liquid.

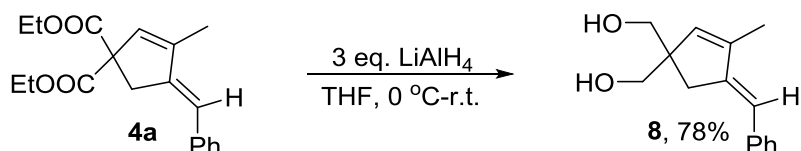

diethyl (E)-4-benzylidene-3-methylcyclopent-2-ene-1,1-dicarboxylate (47 mg, 0.15 mmol) in dry THF (2.0 mL) was added dropwise to a solution of LiAlH<sub>4</sub> (1 M in THF, 0.45 mL) at 0 °C. The reaction mixture was stirred at room temperature for 2 h. After cooling to 0 °C, EtOAc (3.0 mL) was added, and the resulting solution was poured into 1 M HCl (5 mL). After separation of the layers, the water layer was extracted with EtOAc (2×10 mL). The combined organic layers were washed with saturated NaCl solution (10 mL), dried over Na<sub>2</sub>SO<sub>4</sub>, and filtered. The solvent was removed under reduced pressure, purification by column chromatography on silica gel (petroleum ether/ethyl acetate =3:1) provided (3-benzyl-4-methylcyclopenta-2,4-diene-1,1-diyl)dimethanol (27.0 mg, 78%) as a white solid.

## VI. X-ray Crystal Diffraction Data for 2m, 4i, (E)-6a

**Datablock: 20200911\_x2b\_0ma\_a\_a ((E)-6a, CCDC 2035068)**

Bond precision: C-C = 0.0048 Å

Wavelength = 0.71073

Cell: a=10.8820(6) b=13.2681(7) c=13.7729(7)  
 alpha=71.004(2) beta=78.844(2) gamma=78.236(2)

Temperature: 293 K

|                        | Calculated                                         | Reported                                                                     |
|------------------------|----------------------------------------------------|------------------------------------------------------------------------------|
| Volume                 | 1823.35(17)                                        | 1823.35(17)                                                                  |
| Space group            | P -1                                               | P -1                                                                         |
| Hall group             | -P 1                                               | -P 1                                                                         |
| Moiety formula         | C <sub>20</sub> H <sub>21</sub> N O <sub>2</sub> S | 2(C <sub>20</sub> H <sub>21</sub> N O <sub>2</sub> S)                        |
| Sum formula            | C <sub>20</sub> H <sub>21</sub> N O <sub>2</sub> S | C <sub>40</sub> H <sub>42</sub> N <sub>2</sub> O <sub>4</sub> S <sub>2</sub> |
| Mr                     | 339.44                                             | 678.87                                                                       |
| Dx, g cm <sup>-3</sup> | 1.237                                              | 1.237                                                                        |
| Z                      | 4                                                  | 2                                                                            |
| Mu (mm <sup>-1</sup> ) | 0.189                                              | 0.189                                                                        |
| F000                   | 720.0                                              | 720.0                                                                        |
| F000'                  | 720.78                                             |                                                                              |
| h,k,lmax               | 13,16,16                                           | 13,16,16                                                                     |
| Nref                   | 6986                                               | 6622                                                                         |

Tmin,Tmax

0.668,0.745

Tmin'

Correction method= # Reported T Limits: Tmin=0.668 Tmax=0.745

AbsCorr = MULTI-SCAN

Data completeness= 0.948

Theta(max)= 25.765

R(reflections)= 0.0574( 5122)

wR2(reflections)= 0.1500( 6622)

S = 1.052

Npar= 437

Temp

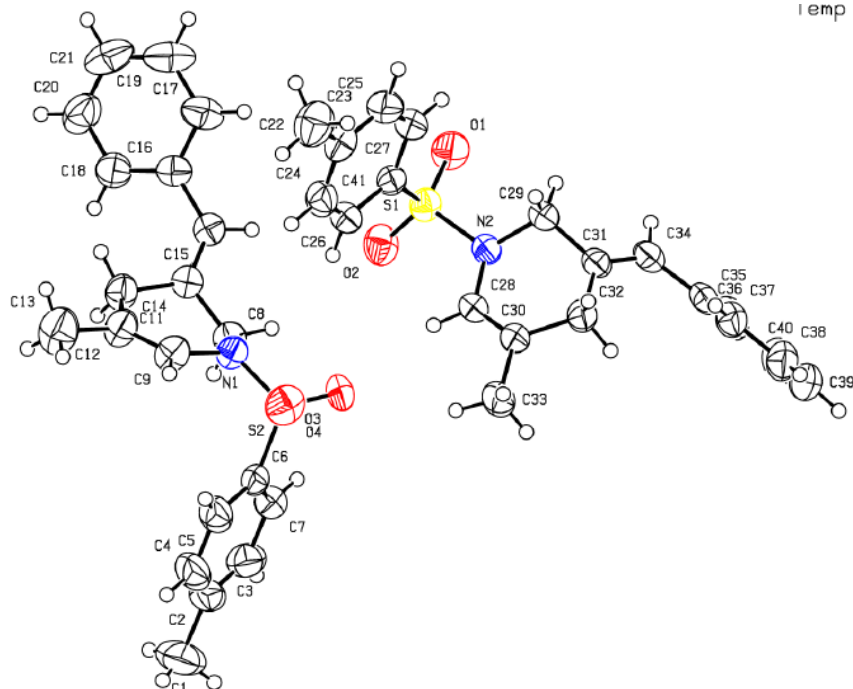

**Datablock: 20200930\_x3\_0m\_a (2m, CCDC 2035069)**

Bond precision: C-C = 0.0035 Å

Wavelength=0.71073

Cell: a=10.955(4) b=10.995(4) c=14.499(5)

alpha=90 beta=101.851(15) gamma=90

Temperature: 297 K

|                | Calculated       | Reported         |
|----------------|------------------|------------------|
| Volume         | 1709.2(11)       | 1709.3(10)       |
| Space group    | P 21/n           | P 1 21/n 1       |
| Hall group     | -P 2yn           | -P 2yn           |
| Moiety formula | C19 H18 F N O2 S | C19 H18 F N O2 S |
| Sum formula    | C19 H18 F N O2 S | C19 H18 F N O2 S |
| Mr             | 343.40           | 343.40           |
| Dx,g cm-3      | 1.334            | 1.334            |
| Z              | 4                | 4                |
| Mu (mm-1)      | 0.210            | 0.210            |
| F000           | 720.0            | 720.0            |
| F000'          | 720.83           |                  |
| h,k,lmax       | 14,14,18         | 14,14,18         |
| Nref           | 3891             | 3872             |

Tmin,Tmax 0.680,0.746  
 Tmin'  
 Correction method= # Reported T Limits: Tmin=0.680 Tmax=0.746  
 AbsCorr = MULTI-SCAN  
 Data completeness= 0.995 Theta(max)= 27.403  
 R(reflections)= 0.0536( 2752) wR2(reflections)= 0.1338( 3872)  
 S = 1.060 Npar= 219

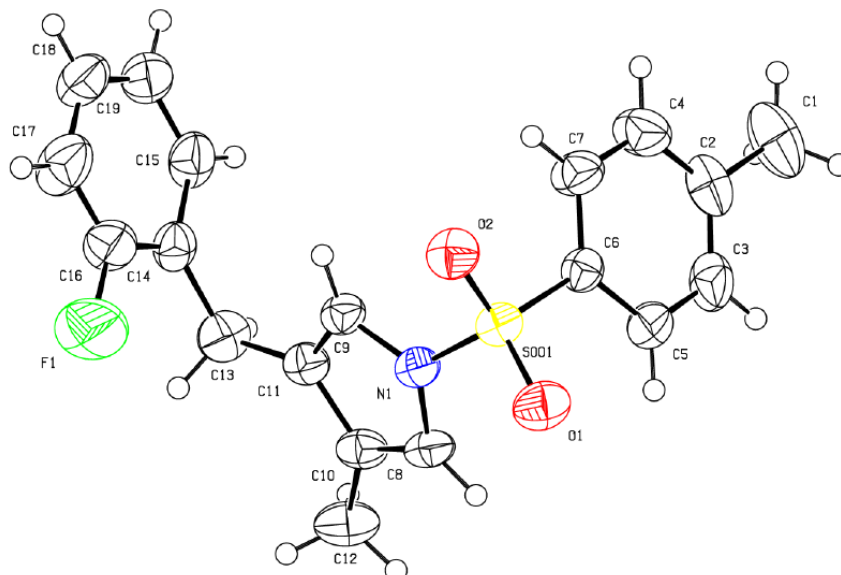

**Datablock: 1 (4i, CCDC2045080)**

Bond precision: C-C = 0.0033 Å

Cell: a=8.5832(9) b=11.1549(12)  
 alpha=65.477(2) beta=86.417(2)

Wavelength=0.71073  
 c=11.2505(12)  
 gamma=88.804(2)

Temperature: 296 K

|                        | Calculated                                     | Reported                                       |
|------------------------|------------------------------------------------|------------------------------------------------|
| Volume                 | 978.08(18)                                     | 978.08(18)                                     |
| Space group            | P -1                                           | P -1                                           |
| Hall group             | -P 1                                           | -P 1                                           |
| Moiety formula         | C <sub>21</sub> H <sub>24</sub> O <sub>5</sub> | ?                                              |
| Sum formula            | C <sub>21</sub> H <sub>24</sub> O <sub>5</sub> | C <sub>21</sub> H <sub>24</sub> O <sub>5</sub> |
| Mr                     | 356.40                                         | 356.40                                         |
| Dx,g cm <sup>-3</sup>  | 1.210                                          | 1.210                                          |
| Z                      | 2                                              | 2                                              |
| Mu (mm <sup>-1</sup> ) | 0.086                                          | 0.086                                          |
| F000                   | 380.0                                          | 380.0                                          |
| F000'                  | 380.20                                         |                                                |
| h,k,lmax               | 10,13,13                                       | 10,13,13                                       |
| Nref                   | 3449                                           | 3418                                           |
| Tmin,Tmax              | 0.978,                                         | 0.983                                          |
| Tmin'                  | 0.978                                          |                                                |

Correction method= Not given

Data completeness= 0.991

R(reflections)= 0.0591( 2725)

S = 1.034

Npar= 246

Theta(max)= 24.998

wR2(reflections)= 0.1868( 3418)

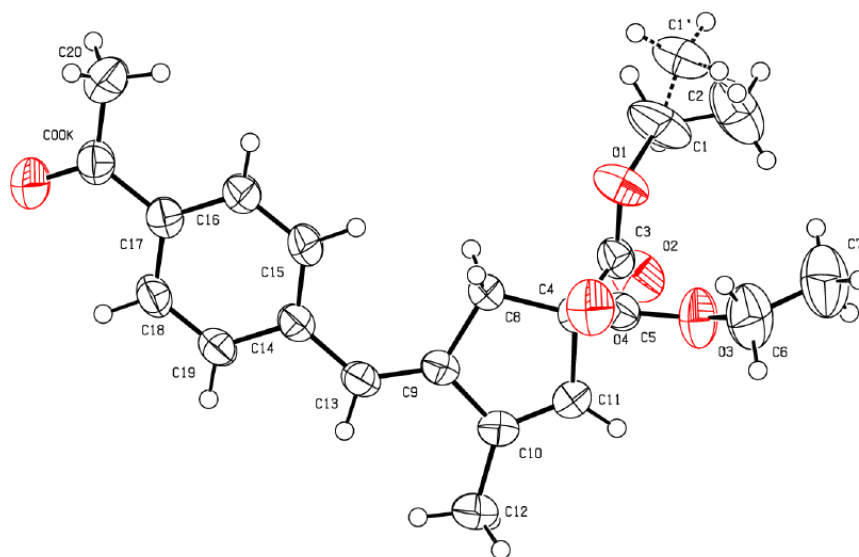

## VII. General Procedure for the synthesis of 5u-d1

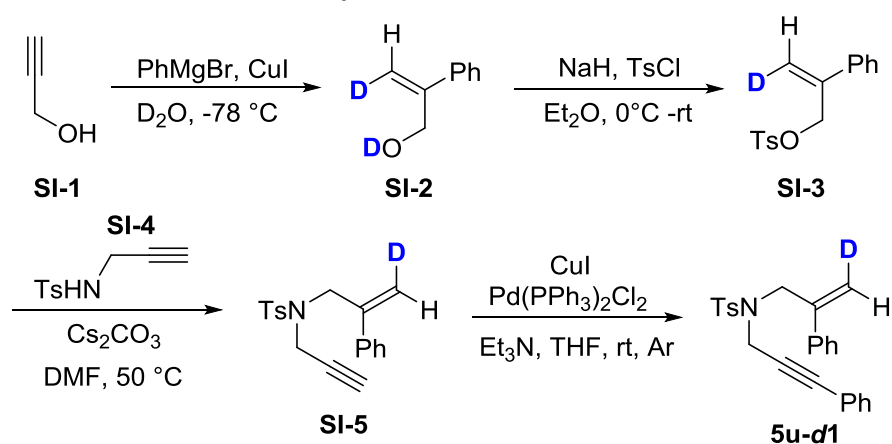

### General Procedure:

**Preparation of SI-2:** To a solution of propargyl alcohol **SI-1** (1.12 g, 20 mmol) in dry THF (40 mL) was vacuum purged three times, backfilling with N<sub>2</sub>. CuI (0.38 g, 2.0 mmol) was added under stirring and N<sub>2</sub> atmosphere. The suspension was cooled to -78 °C. Then a solution of PhMgBr (9.05 g, 50 mmol) in 60 mL THF was added dropwise by constant pressure funnel under vigorous stirring. The resulting mixture held at -78 °C for 1 h. Then it was warmed to room temperature and stirred for 18 h. The mixture was cooled to -78 °C again and quenched slowly with D<sub>2</sub>O (4.0 g, 200 mmol). After the suspension was warmed to room temperature, dilute HCl solution (1 N, 150 mL) was added and the aqueous layer was extracted with EtOAc (3 × 50 mL). The combined organic layers were washed brine (30 mL), dried with Na<sub>2</sub>SO<sub>4</sub>, and concentrated in vacuo. Purification by column chromatography (PE: EA=5:1) afforded the **SI-2** as a yellow liquid (2.67 g, 19.6 mmol, 98% yield).

**Preparation of SI-3:** To a suspension of NaH (Purity is 60%) (1.08 g, 27 mmol) in 15

mL Et<sub>2</sub>O was added **SI-2** (2.45 g, 18 mmol) under N<sub>2</sub> atmosphere. The mixture was stirred for 30 min at room temperature and then cooled to 0 °C. A solution of TsCl (3.43 g, 18 mmol) in 15 mL Et<sub>2</sub>O was added dropwise. The resulting mixture was warmed to room temperature and stirred for 1 h. Then the solution was quenched with a saturated aqueous solution of NH<sub>4</sub>Cl (30 mL). The aqueous layer was extracted with Et<sub>2</sub>O (3×10 mL). The combined organic layers were washed with brine (25 mL), dried with Na<sub>2</sub>SO<sub>4</sub>, and concentrated in vacuo to afford the crude product **SI-3** as a yellow solid (3.12 g, 10.8 mmol, 60% yield), which was used without further purification.

**Preparation of SI-5:** To a solution of **SI-3** (2.89 g, 10 mmol) in 15 mL DMF was added **SI-4** (4.18 g, 20 mmol) and Cs<sub>2</sub>CO<sub>3</sub> (9.78 g, 30 mmol). The mixture was heated to 50 °C and stirred for 5 h. The reaction was quenched with a saturated aqueous solution of NH<sub>4</sub>Cl (30 mL), the aqueous layer was extracted with EtOAc (20 mL). The combined organic layers were washed with brine (3×30 mL), dried with Na<sub>2</sub>SO<sub>4</sub>, and evaporated. The crude product was purified by column chromatography (PE: EA=2:1) to give the **SI-5** (2.54 g, 7.8 mmol, 78% yield) as a yellow solid.

**Preparation of 5u-d1:** Under the protection of argon. To a solution of iodobenzene (1.7 g, 8.4 mmol), Pd(PPh<sub>3</sub>)<sub>2</sub>Cl<sub>2</sub> (0.098 g, 0.14 mmol), CuI (0.053 g, 0.28 mmol) in Et<sub>3</sub>N (10 mL) and THF (8 mL) were added dropwise **SI-5** (2.28 g, 7 mmol). The resulting mixture was stirred overnight at room temperature until the completion of the reaction (monitoring by TLC). The mixture was quenched with HCl and extracted with EtOAc (2×15 mL), washed with brine (10 mL), dried over Na<sub>2</sub>SO<sub>4</sub>, and concentrated under vacuo. The crude residue was purified by flash chromatography (PE: EA=6:1) to provide **5u-d1** (2.3 g, 5.7 mmol, 82% yield) as a yellow solid.

<sup>1</sup>H NMR (400 MHz, CDCl<sub>3</sub>): 7.80 (d, *J* = 8.3 Hz, 2H), 7.58 (d, *J* = 6.8 Hz, 2H), 7.38 – 7.23 (m, 8H), 7.03 (d, *J* = 6.6 Hz, 2H), 5.60 (s, 1H), 4.32 (s, 2H), 4.20 (s, 2H), 2.33 (s, 3H).

## VIII. Data of products 2, 4, 6, 7, 8

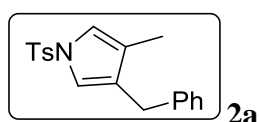

3-benzyl-4-methyl-1-tosyl-1H-pyrrole, M.P.= 97-99 °C, 67%, yellow solid, 21.5mg.  
CAS: 862170-74-9

<sup>1</sup>H NMR (400 MHz, CDCl<sub>3</sub>): 7.69 (d, *J* = 8.3 Hz, 2H), 7.25 (t, *J* = 7.3 Hz, 4H), 7.18 (t, *J* = 7.3 Hz, 1H), 7.09 (d, *J* = 7.0 Hz, 2H), 6.86 (s, 1H), 6.79 (s, 1H), 3.65 (s, 2H), 2.39 (s, 3H), 1.84 (s, 3H). <sup>13</sup>C NMR (100 MHz, CDCl<sub>3</sub>): 144.48, 139.56, 136.28, 129.77, 128.49, 128.45, 128.32, 126.64, 126.04, 124.47, 118.75, 118.38, 31.56, 21.53, 10.25. IR (cm<sup>-1</sup>): 3128, 3061, 3026, 2921, 1916, 1655, 1595, 1517, 1493, 1452, 1366, 1305, 1283, 1169, 1093, 1065, 964, 812, 791, 728, 701, 672.

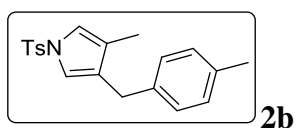



3-methyl-4-(4-methylbenzyl)-1-tosyl-1H-pyrrole, oil, 44%, 15 mg.

$^1\text{H}$  NMR (400 MHz,  $\text{CDCl}_3$ ): 7.69 (d,  $J = 8.3$  Hz, 2H), 7.27 (d,  $J = 8.1$  Hz, 2H), 7.06 (d,  $J = 7.8$  Hz, 2H), 6.99 (d,  $J = 7.9$  Hz, 2H), 6.85 (s, 1H), 6.78 (s, 1H), 3.61 (s, 2H), 2.40 (s, 3H), 2.31 (s, 3H), 1.84 (s, 3H).  $^{13}\text{C}$  NMR (100 MHz,  $\text{CDCl}_3$ ): 144.46, 136.47, 136.37, 135.54, 129.79, 129.04, 128.76, 128.41, 126.68, 124.52, 118.71, 118.36, 31.17, 21.58, 20.97, 10.30. IR ( $\text{cm}^{-1}$ ): 3128, 2920, 1595, 1513, 1493, 1451, 1366, 1305, 1287, 1170, 1093, 1065, 1018, 964, 912, 811, 787, 757, 703, 673. HRMS (ESI)  $m/z$  calcd for  $\text{C}_{20}\text{H}_{21}\text{NO}_2\text{SNa}^+$  ( $\text{M}+\text{Na}$ ) $^+$  362.11852, found 362.11853.

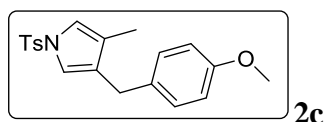

3-(4-methoxybenzyl)-4-methyl-1-tosyl-1H-pyrrole, M.P. = 75-77  $^{\circ}\text{C}$ , 65%, 23mg.  
CAS: 923297-68-1.

$^1\text{H}$  NMR (400 MHz,  $\text{CDCl}_3$ ): 7.69 (d,  $J = 8.3$  Hz, 2H), 7.27 (d,  $J = 8.1$  Hz, 2H), 7.01 (d,  $J = 8.6$  Hz, 2H), 6.85 (s, 1H), 6.80 (d,  $J = 8.6$  Hz, 2H), 6.76 (s, 1H), 3.78 (s, 3H), 3.59 (s, 2H), 2.40 (s, 3H), 1.84 (s, 3H).  $^{13}\text{C}$  NMR (100 MHz,  $\text{CDCl}_3$ ): 157.89, 144.44, 136.33, 131.57, 129.76, 129.43, 128.95, 126.65, 118.61, 118.36, 113.74, 55.19, 30.70, 21.55, 10.25. IR ( $\text{cm}^{-1}$ ): 2978, 2928, 2835, 1611, 1596, 1511, 1463, 1370, 1280, 1246, 1171, 1124, 1093, 1065, 1035, 960, 848, 813, 791, 704, 673.

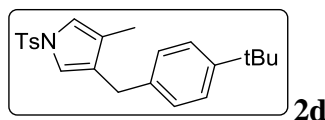

3-(4-(tert-butyl)benzyl)-4-methyl-1-tosyl-1H-pyrrole, M.P.= 128-130  $^{\circ}\text{C}$ , 66%, 25 mg.

$^1\text{H}$  NMR (400 MHz,  $\text{CDCl}_3$ ): 7.69 (d,  $J = 8.3$  Hz, 2H), 7.27 (d,  $J = 8.2$  Hz, 4H), 7.03 (d,  $J = 8.2$  Hz, 2H), 6.86 (s, 1H), 6.81 (s, 1H), 3.62 (s, 2H), 2.40 (s, 3H), 1.85 (s, 3H), 1.30 (s, 9H).  $^{13}\text{C}$  NMR (100 MHz,  $\text{CDCl}_3$ ): 148.87, 144.46, 136.48, 136.37, 129.79, 128.63, 128.14, 126.68, 125.24, 124.59, 118.75, 118.33, 34.33, 31.37, 31.01, 21.58, 10.32. IR ( $\text{cm}^{-1}$ ): 3128, 2961, 2866, 1596, 1514, 1494, 1457, 1366, 1306, 1290, 1170, 1093, 1066, 1017, 965, 812, 792, 729, 703, 672. HRMS (ESI)  $m/z$  calcd for  $\text{C}_{23}\text{H}_{27}\text{NO}_2\text{SNa}^+$  ( $\text{M}+\text{Na}$ ) $^+$  404.16547, found 404.16556.

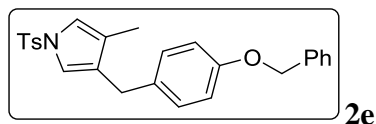

3-(4-(benzyloxy)benzyl)-4-methyl-1-tosyl-1H-pyrrole, oil, 52%, 22 mg.

$^1\text{H}$  NMR (400 MHz,  $\text{CDCl}_3$ ): 7.69 (d,  $J = 8.3$  Hz, 2H), 7.45 – 7.36 (m, 4H), 7.33 (d,  $J = 7.2$  Hz, 1H), 7.26 (d,  $J = 7.9$  Hz, 2H), 7.01 (d,  $J = 8.5$  Hz, 2H), 6.90 – 6.84 (m, 3H), 6.76 (s, 1H), 5.04 (s, 2H), 3.59 (s, 2H), 2.40 (s, 3H), 1.84 (s, 3H).  $^{13}\text{C}$  NMR (100 MHz,  $\text{CDCl}_3$ ): 157.18, 144.46, 137.10, 136.35, 131.92, 129.78, 129.48, 128.90, 128.54, 127.89, 127.46, 126.67, 124.44, 118.66, 118.38, 114.73, 83.47, 70.04, 30.74, 21.57, 10.28. IR ( $\text{cm}^{-1}$ ): 3031, 2977, 2923, 1610, 1596, 1509, 1453, 1369, 1281, 1239, 1170, 1123, 1093, 1065, 960, 848, 812, 791, 741, 703, 672. HRMS (ESI)  $m/z$  calcd for  $\text{C}_{26}\text{H}_{25}\text{NO}_3\text{SNa}^+$  ( $\text{M}+\text{Na}$ ) $^+$  454.14474, found 454.14490.

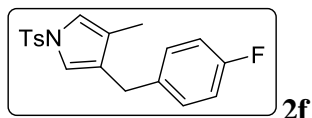

3-(4-fluorobenzyl)-4-methyl-1-tosyl-1H-pyrrole, M.P.= 132-134 °C, 69%, 24 mg.  
<sup>1</sup>H NMR (400 MHz, CDCl<sub>3</sub>): 7.69 (d, *J* = 8.3 Hz, 2H), 7.27 (d, *J* = 8.2 Hz, 2H), 7.07 – 7.02 (m, 2H), 6.94 (t, *J* = 8.7 Hz, 2H), 6.87 (s, 1H), 6.77 (s, 1H), 3.63 (s, 2H), 2.40 (s, 3H), 1.83 (s, 3H). <sup>13</sup>C NMR (100 MHz, CDCl<sub>3</sub>): 162.57 (d, *J* = 243.0 Hz), 160.14, 144.58, 136.28, 135.23 (d, *J* = 4.0 Hz), 135.19, 129.91, 129.82, 128.33, 126.70, 124.29, 118.69 (d, *J* = 17.0 Hz), 118.52, 115.22 (d, *J* = 21.0 Hz), 115.01, 30.81, 21.58, 10.25. <sup>19</sup>F NMR (376 MHz, CDCl<sub>3</sub>): -117.25 (s). IR (cm<sup>-1</sup>): 3123, 3049, 2921, 2846, 1598, 1507, 1440, 1356, 1306, 1282, 1216, 1169, 1092, 1065, 1015, 965, 840, 808, 785, 762, 703, 673. HRMS (ESI) *m/z* calcd for C<sub>19</sub>H<sub>18</sub>FNO<sub>2</sub>SNa<sup>+</sup> (M+Na)<sup>+</sup> 366.09345, found 366.09369.

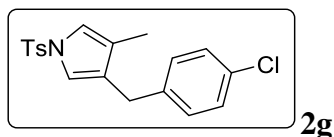

3-(4-chlorobenzyl)-4-methyl-1-tosyl-1H-pyrrole, oil, 64%, 23 mg.  
<sup>1</sup>H NMR (400 MHz, CDCl<sub>3</sub>): 7.70 (d, *J* = 8.3 Hz, 2H), 7.27 (d, *J* = 10.4 Hz, 2H), 7.22 (d, *J* = 8.3 Hz, 2H), 7.02 (d, *J* = 8.2 Hz, 2H), 6.87 (s, 1H), 6.78 (s, 1H), 3.62 (s, 2H), 2.41 (s, 3H), 1.83 (s, 3H). <sup>13</sup>C NMR (100 MHz, CDCl<sub>3</sub>): 144.60, 138.11, 136.31, 131.88, 129.86, 129.84, 128.49, 127.89, 126.72, 124.25, 118.77, 118.57, 31.00, 21.60. IR (cm<sup>-1</sup>): 3129, 2922, 2852, 1596, 1490, 1452, 1367, 1300, 1284, 1169, 1092, 1065, 1015, 966, 909, 811, 787, 733, 670. HRMS (ESI) *m/z* calcd for C<sub>19</sub>H<sub>18</sub>ClNO<sub>2</sub>SNa<sup>+</sup> (M+Na)<sup>+</sup> 382.06390, found 382.06403.

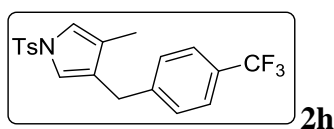

3-methyl-1-tosyl-4-(4-(trifluoromethyl)benzyl)-1H-pyrrole, M.P.= 71-73 °C, 71%, 28 mg.  
<sup>1</sup>H NMR (400 MHz, CDCl<sub>3</sub>): 7.70 (d, *J* = 8.3 Hz, 2H), 7.51 (d, *J* = 8.1 Hz, 2H), 7.28 (d, *J* = 8.2 Hz, 2H), 7.21 (d, *J* = 8.0 Hz, 2H), 6.88 (s, 1H), 6.81 (s, 1H), 3.72 (s, 2H), 2.41 (s, 3H), 1.83 (s, 3H). <sup>13</sup>C NMR (100 MHz, CDCl<sub>3</sub>): 144.69, 143.80, 136.24, 129.86, 129.00 (q, *J* = 32.0 Hz), 128.80, 128.67, 128.35, 128.30 (q, *J* = 270.0 Hz), 128.03, 127.29, 126.72, 125.60, 125.37 (q, *J* = 4.0 Hz), 125.33, 125.29, 125.25, 124.19, 122.90, 120.19, 118.85, 118.64, 31.43, 21.57, 10.24. <sup>19</sup>F NMR (376 MHz, CDCl<sub>3</sub>): -62.33 (s). IR (cm<sup>-1</sup>): 3133, 2923, 1617, 1596, 1517, 1367, 1325, 1170, 1122, 1093, 1066, 1018, 966, 812, 794, 703, 671. HRMS (ESI) *m/z* calcd for C<sub>20</sub>H<sub>18</sub>F<sub>3</sub>NO<sub>2</sub>SNa<sup>+</sup> (M+Na)<sup>+</sup> 416.09026, found 416.09033.

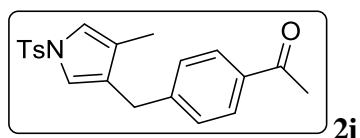

1-(4-((4-methyl-1-tosyl-1H-pyrrol-3-yl)methyl)phenyl)ethan-1-one, M.P.= 88-90 °C, 41%, 15mg.

<sup>1</sup>H NMR (400 MHz, CDCl<sub>3</sub>): 7.86 (d, *J* = 8.2 Hz, 2H), 7.70 (d, *J* = 8.3 Hz, 2H), 7.28 (d, *J* = 8.2 Hz, 2H), 7.19 (d, *J* = 8.1 Hz, 2H), 6.88 (s, 1H), 6.80 (s, 1H), 3.72 (s, 2H), 2.59 (s, 3H), 2.41 (s, 3H), 1.83 (s, 3H). <sup>13</sup>C NMR (100 MHz, CDCl<sub>3</sub>): 197.83, 145.38, 144.66, 136.21, 135.31, 129.86, 128.72, 128.55, 127.35, 126.70, 124.22, 118.83, 118.57, 31.63, 26.56, 21.60, 10.26. IR (cm<sup>-1</sup>): 3127, 2922, 1680, 1605, 1518, 1494, 1412, 1364, 1267, 1169, 1093, 1065, 1016, 959, 812, 792, 730, 703, 674. HRMS (ESI) *m/z* calcd for C<sub>21</sub>H<sub>21</sub>NO<sub>3</sub>SNa<sup>+</sup> (M+Na)<sup>+</sup> 390.11344, found 390.11346.

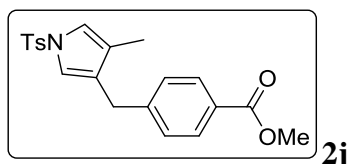

methyl 4-((4-methyl-1-tosyl-1H-pyrrol-3-yl)methyl)benzoate, oil, 58%, 22 mg.

<sup>1</sup>H NMR (400 MHz, CDCl<sub>3</sub>): 7.93 (d, *J* = 8.3 Hz, 2H), 7.70 (d, *J* = 8.3 Hz, 2H), 7.28 (d, *J* = 8.2 Hz, 2H), 7.16 (d, *J* = 8.2 Hz, 2H), 6.88 (s, 1H), 6.80 (s, 1H), 3.90 (s, 3H), 3.71 (s, 2H), 2.41 (s, 3H), 1.82 (s, 3H). <sup>13</sup>C NMR (100 MHz, CDCl<sub>3</sub>): 167.00, 145.10, 144.63, 136.18, 129.83, 129.70, 128.52, 128.11, 127.43, 126.67, 124.25, 118.83, 118.56, 51.99, 31.62, 21.57, 10.23. IR (cm<sup>-1</sup>): 3128, 2951, 2922, 1719, 1610, 1434, 1366, 1280, 1170, 1093, 1066, 1019, 965, 812, 790, 744, 703, 670. HRMS (ESI) *m/z* calcd for C<sub>21</sub>H<sub>21</sub>NO<sub>4</sub>SNa<sup>+</sup> (M+Na)<sup>+</sup> 406.10835, found 406.10852.

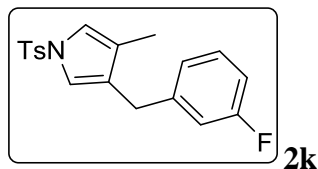

3-(3-fluorobenzyl)-4-methyl-1-tosyl-1H-pyrrole, oil, 72%, 25 mg.

<sup>1</sup>H NMR (400 MHz, CDCl<sub>3</sub>): 7.70 (d, *J* = 8.3 Hz, 2H), 7.28 (d, *J* = 8.1 Hz, 2H), 7.24 – 7.18 (m, 1H), 6.91 – 6.85 (m, 3H), 6.82 (s, 1H), 6.74 (d, *J* = 10.0 Hz, 1H), 3.66 (s, 2H), 2.40 (s, 3H), 1.83 (s, 3H). <sup>13</sup>C NMR (100 MHz, CDCl<sub>3</sub>): 164.15 (d, *J* = 244.0 Hz), 161.71, 144.64, 142.33 (d, *J* = 7.0 Hz), 142.26, 136.24, 129.84, 129.78, 129.70, 127.63, 126.67, 124.35, 124.16 (d, *J* = 2.0 Hz), 124.14, 118.92, 118.62, 115.40 (d, *J* = 21.0 Hz), 115.19, 113.11 (d, *J* = 21.0 Hz), 112.90, 31.28 (d, *J* = 2.0 Hz), 31.26, 21.56, 10.22. <sup>19</sup>F NMR (376 MHz, CDCl<sub>3</sub>): -113.57 (s). IR (cm<sup>-1</sup>): 3134, 2922, 1615, 1588, 1518, 1486, 1447, 1366, 1290, 1247, 1170, 1093, 1066, 946, 812, 780, 751, 672. HRMS (ESI) *m/z* calcd for C<sub>19</sub>H<sub>18</sub>FNO<sub>2</sub>SNa<sup>+</sup> (M+Na)<sup>+</sup> 366.09345, found 366.09360.

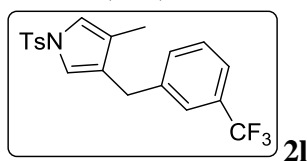

3-methyl-1-tosyl-4-(3-(trifluoromethyl)benzyl)-1H-pyrrole, M.P.= 99-101 °C, 69%, 27 mg.

$^1\text{H}$  NMR (400 MHz,  $\text{CDCl}_3$ ): 7.69 (d,  $J = 8.3$  Hz, 2H), 7.45 (d,  $J = 7.7$  Hz, 1H), 7.37 (t,  $J = 7.6$  Hz, 1H), 7.31 – 7.25 (m, 4H), 6.88 (s, 1H), 6.80 (s, 1H), 3.72 (s, 2H), 2.40 (s, 3H), 1.83 (s, 3H).  $^{13}\text{C}$  NMR (100 MHz,  $\text{CDCl}_3$ ): 144.70, 140.64, 136.16, 131.93, 130.83 (d,  $J = 32.0$  Hz), 130.51, 129.86, 128.81, 127.48, 126.63, 125.18 (q,  $J = 4.0$  Hz), 125.14, 125.10, 125.07, 124.25, 123.11 (q,  $J = 4.0$  Hz), 123.07, 123.03, 122.99, 118.96, 118.72, 31.34, 21.56, 10.24.  $^{19}\text{F}$  NMR (376 MHz,  $\text{CDCl}_3$ ): -62.58 (s). IR ( $\text{cm}^{-1}$ ): 2923, 1596, 1518, 1493, 1448, 1367, 1332, 1294, 1168, 1123, 1093, 1066, 811, 790, 702, 670. HRMS (ESI)  $m/z$  calcd for  $\text{C}_{20}\text{H}_{18}\text{F}_3\text{NO}_2\text{SNa}^+$  ( $\text{M}+\text{Na}$ ) $^+$  416.09026, found 416.09033.

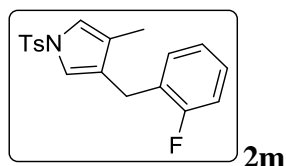

3-(2-fluorobenzyl)-4-methyl-1-tosyl-1H-pyrrole, M.P.= 117-119 °C, 68%, 23 mg.

$^1\text{H}$  NMR (400 MHz,  $\text{CDCl}_3$ ): 7.69 (d,  $J = 8.3$  Hz, 2H), 7.26 (d,  $J = 7.8$  Hz, 2H), 7.17 (dd,  $J = 10.1, 4.1$  Hz, 1H), 7.01 (q,  $J = 8.4, 6.6$  Hz, 3H), 6.86 (s, 1H), 6.81 (s, 1H), 3.67 (s, 2H), 2.40 (s, 3H), 1.88 (s, 3H).  $^{13}\text{C}$  NMR (100 MHz,  $\text{CDCl}_3$ ): 162.05 (d,  $J = 244.0$  Hz), 159.61, 144.54, 136.30, 130.49 (d,  $J = 4.0$  Hz), 130.45, 129.81, 127.94 (d,  $J = 8.0$  Hz), 127.86, 127.00, 126.67, 124.36, 124.00 (d,  $J = 3.0$  Hz), 123.97, 118.94, 118.35, 115.28 (d,  $J = 22.0$  Hz), 115.06, 24.35 (d,  $J = 4.0$  Hz), 24.31, 21.57, 10.15.  $^{19}\text{F}$  NMR (376 MHz,  $\text{CDCl}_3$ ): -118.25 (s). IR ( $\text{cm}^{-1}$ ): 3129, 2922, 1595, 1585, 1491, 1455, 1367, 1287, 1229, 1170, 1093, 1066, 966, 811, 756, 704, 672. HRMS (ESI)  $m/z$  calcd for  $\text{C}_{19}\text{H}_{18}\text{FNO}_2\text{SNa}^+$  ( $\text{M}+\text{Na}$ ) $^+$  366.09345, found 366.09360.

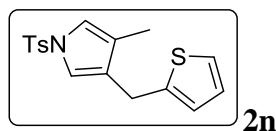

3-methyl-4-(thiophen-2-ylmethyl)-1-tosyl-1H-pyrrole, oil, 46%, 15 mg.

$^1\text{H}$  NMR (400 MHz,  $\text{CDCl}_3$ ): 7.70 (d,  $J = 8.4$  Hz, 2H), 7.27 (d,  $J = 8.0$  Hz, 2H), 7.12 (d,  $J = 4.0$  Hz, 1H), 6.95 – 6.82 (m, 3H), 6.72 (d,  $J = 4.4$  Hz, 1H), 3.85 (s, 2H), 2.40 (s, 3H), 1.89 (s, 3H).  $^{13}\text{C}$  NMR (100 MHz,  $\text{CDCl}_3$ ): 144.56, 142.87, 136.28, 129.83, 127.90, 126.71, 126.67, 124.86, 124.16, 123.68, 118.76, 118.41, 25.91, 21.58, 10.13. IR ( $\text{cm}^{-1}$ ): 3127, 2921, 1595, 1517, 1493, 1439, 1366, 1307, 1283, 1170, 1093, 1065, 850, 812, 794, 702, 672. HRMS (ESI)  $m/z$  calcd for  $\text{C}_{17}\text{H}_{17}\text{NO}_2\text{S}_2\text{Na}^+$  ( $\text{M}+\text{Na}$ ) $^+$  354.05929, found 354.05933.

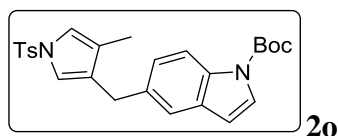

tert-butyl 5-((4-methyl-1-tosyl-1H-pyrrol-3-yl)methyl)-1H-indole-1-carboxylate, oil, 51%, 24 mg.

$^1\text{H}$  NMR (400 MHz,  $\text{CDCl}_3$ ): 8.01 (d,  $J = 8.1$  Hz, 1H), 7.69 (d,  $J = 8.3$  Hz, 2H), 7.56 (d,  $J = 3.5$  Hz, 1H), 7.26 (d,  $J = 8.0$  Hz, 3H), 7.07 (d,  $J = 8.5$  Hz, 1H), 6.86 (s, 1H),

6.79 (s, 1H), 6.47 (d,  $J = 3.6$  Hz, 1H), 3.74 (s, 2H), 2.40 (s, 3H), 1.84 (s, 3H), 1.66 (s, 9H).  $^{13}\text{C}$  NMR (100 MHz,  $\text{CDCl}_3$ ): 149.75, 144.45, 136.34, 133.88, 130.73, 129.78, 129.09, 126.67, 126.04, 125.03, 124.53, 120.52, 118.76, 118.40, 114.91, 107.09, 83.55, 31.48, 28.16, 21.57, 10.32. IR ( $\text{cm}^{-1}$ ): 3125, 2976, 2923, 1731, 1595, 1468, 1370, 1349, 1292, 1255, 1216, 1169, 1133, 1065, 1023, 910, 765, 730, 671. HRMS (ESI)  $m/z$  calcd for  $\text{C}_{26}\text{H}_{28}\text{N}_2\text{O}_4\text{SNa}^+$  ( $\text{M}+\text{Na}$ ) $^+$  487.16620, found 487.16653.

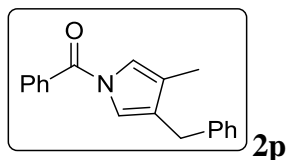

(3-benzyl-4-methyl-1H-pyrrol-1-yl)(phenyl)methanone, oil, 58%, 16 mg.

$^1\text{H}$  NMR (400 MHz,  $\text{CDCl}_3$ ): 7.70 (d,  $J = 7.0$  Hz, 2H), 7.57 (t,  $J = 7.4$  Hz, 1H), 7.48 (t,  $J = 7.5$  Hz, 2H), 7.31 – 7.27 (m, 2H), 7.21 (d,  $J = 7.5$  Hz, 3H), 6.99 (s, 2H), 3.75 (s, 2H), 1.92 (s, 3H).  $^{13}\text{C}$  NMR (100 MHz,  $\text{CDCl}_3$ ): 133.54, 131.84, 129.25, 128.57, 128.39, 128.34, 128.10, 126.06, 124.01, 119.07, 119.01, 31.76, 10.43. IR ( $\text{cm}^{-1}$ ): 3060, 3026, 2920, 1687, 1601, 1527, 1493, 1446, 1391, 1353, 1332, 1246, 1179, 1133, 1074, 1028, 998, 880, 792, 718, 697, 664. HRMS (ESI)  $m/z$  calcd for  $\text{C}_{19}\text{H}_{17}\text{NNaO}^+$  ( $\text{M}+\text{Na}$ ) $^+$  298.12024, found 298.12030.

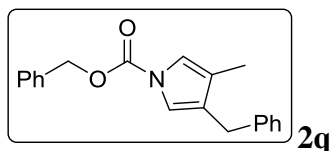

benzyl 3-benzyl-4-methyl-1H-pyrrole-1-carboxylate, oil, 61%, 18.6 mg.

$^1\text{H}$  NMR (400 MHz,  $\text{CDCl}_3$ ): 7.38 (dt,  $J = 14.2, 7.0$  Hz, 5H), 7.29 – 7.24 (m, 2H), 7.20 – 7.16 (m, 3H), 7.02 (s, 1H), 6.95 (s, 1H), 5.31 (s, 2H), 3.71 (s, 2H), 1.89 (s, 3H).  $^{13}\text{C}$  NMR (100 MHz,  $\text{CDCl}_3$ ): 150.16, 140.08, 135.14, 128.63, 128.58, 128.55, 128.35, 127.19, 125.97, 123.08, 117.94, 117.66, 68.47, 31.66, 10.31. IR ( $\text{cm}^{-1}$ ): 3061, 3027, 2921, 1741, 1530, 1494, 1453, 1409, 1355, 1333, 1239, 1109, 1074, 984, 789, 765, 730, 696. HRMS (ESI)  $m/z$  calcd for  $\text{C}_{20}\text{H}_{19}\text{NNaO}_2^+$  ( $\text{M}+\text{Na}$ ) $^+$  328.13080, found 328.13091.

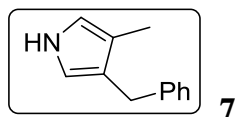

3-benzyl-4-methyl-1H-pyrrole, oil, 90%, 31 mg.

$^1\text{H}$  NMR (400 MHz,  $\text{CDCl}_3$ ): 7.78 (s, 1H), 7.29 – 7.14 (m, 5H), 6.53 (s, 1H), 6.41 (s, 1H), 3.79 (s, 2H), 1.98 (s, 3H).  $^{13}\text{C}$  NMR (100 MHz,  $\text{CDCl}_3$ ): 141.83, 128.59, 128.18, 125.54, 122.13, 117.79, 116.22, 115.88, 31.69, 10.17. IR ( $\text{cm}^{-1}$ ): 3437, 3081, 3059, 3024, 2920, 1602, 1492, 1451, 1284, 1250, 1180, 1062, 1028, 980, 783, 722, 631.

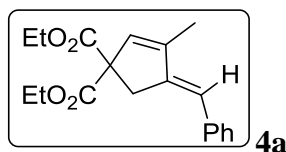

diethyl 3-benzyl-4-methylcyclopenta-2,4-diene-1,1-dicarboxylate, oil, 78%, 24.5 mg.

$^1\text{H}$  NMR (400 MHz,  $\text{CDCl}_3$ ): 7.41 (d,  $J = 7.6$  Hz, 2H), 7.35 (t,  $J = 7.7$  Hz, 2H), 7.21 (t,  $J = 7.2$  Hz, 1H), 6.30 (s, 1H), 5.98 (s, 1H), 4.20 (q,  $J = 7.1$  Hz, 4H), 3.49 (s, 2H), 1.95 (s, 3H), 1.26 (t,  $J = 7.1$  Hz, 6H).  $^{13}\text{C}$  NMR (100 MHz,  $\text{CDCl}_3$ ): 170.73, 145.51, 144.37, 137.48, 130.15, 128.41, 128.37, 126.53, 120.17, 64.45, 61.72, 37.56, 14.00, 13.02. IR ( $\text{cm}^{-1}$ ): 2979, 1731, 1595, 1491, 1445, 1386, 1365, 1249, 1215, 1183, 1140, 1094, 1062, 866, 751, 694, 616. HRMS (ESI)  $m/z$  calcd for  $\text{C}_{19}\text{H}_{22}\text{O}_4\text{Na}^+$  ( $\text{M}+\text{Na}$ ) $^+$  337.14103, found 337.14105.

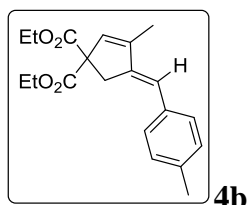

diethyl 3-methyl-4-(4-methylbenzyl)cyclopenta-2,4-diene-1,1-dicarboxylate, oil, 70%, 23 mg.

$^1\text{H}$  NMR (400 MHz,  $\text{CDCl}_3$ ): 7.31 (d,  $J = 8.1$  Hz, 2H), 7.16 (d,  $J = 7.9$  Hz, 2H), 6.27 (s, 1H), 5.95 (s, 1H), 4.20 (q,  $J = 6.9$  Hz, 4H), 3.48 (s, 2H), 2.35 (s, 3H), 1.94 (s, 3H), 1.26 (t,  $J = 7.1$  Hz, 6H).  $^{13}\text{C}$  NMR (100 MHz,  $\text{CDCl}_3$ ): 170.83, 145.62, 143.40, 136.35, 134.66, 129.63, 129.15, 128.32, 120.07, 64.45, 61.71, 37.56, 21.16, 14.01, 13.05. IR ( $\text{cm}^{-1}$ ): 2979, 2920, 1732, 1511, 1445, 1386, 1365, 1249, 1213, 1182, 1140, 1094, 1064, 1011, 872, 797, 711. HRMS (ESI)  $m/z$  calcd for  $\text{C}_{20}\text{H}_{24}\text{O}_4\text{Na}^+$  ( $\text{M}+\text{Na}$ ) $^+$  351.15668, found 351.15662.

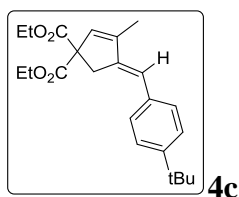

diethyl 3-(4-(tert-butyl)benzyl)-4-methylcyclopenta-2,4-diene-1,1-dicarboxylate, oil, 65%, 24 mg.

$^1\text{H}$  NMR (400 MHz,  $\text{CDCl}_3$ ): 7.40 – 7.34 (m, 4H), 6.28 (s, 1H), 5.95 (s, 1H), 4.23 – 4.17 (m, 4H), 3.49 (s, 2H), 1.94 (s, 3H), 1.33 (s, 9H), 1.27 (t,  $J = 7.1$  Hz, 6H).  $^{13}\text{C}$  NMR (100 MHz,  $\text{CDCl}_3$ ): 170.85, 149.57, 145.68, 143.63, 134.73, 129.68, 128.17, 125.38, 119.93, 64.47, 61.72, 37.61, 34.53, 31.26, 14.05, 13.09. IR ( $\text{cm}^{-1}$ ): 2962, 2868, 1732, 1509, 1462, 1445, 1387, 1364, 1249, 1207, 1181, 1140, 1095, 1064, 874, 825, 799. HRMS (ESI)  $m/z$  calcd for  $\text{C}_{23}\text{H}_{30}\text{O}_4\text{Na}^+$  ( $\text{M}+\text{Na}$ ) $^+$  393.20363, found 393.20370.

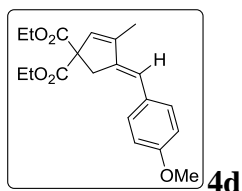

diethyl 3-(4-methoxybenzyl)-4-methylcyclopenta-2,4-diene-1,1-dicarboxylate, M.P.= 60-62  $^{\circ}\text{C}$ , 63%, white solid, 22 mg.

$^1\text{H}$  NMR (400 MHz,  $\text{CDCl}_3$ ): 7.36 (d,  $J = 8.8$  Hz, 2H), 6.90 (d,  $J = 8.8$  Hz, 2H), 6.25 (s, 1H), 5.92 (s, 1H), 4.20 (q,  $J = 6.8$  Hz, 4H), 3.82 (s, 3H), 3.46 (s, 2H), 1.93 (s, 3H),

1.27 (t,  $J = 7.1$  Hz, 6H).  $^{13}\text{C}$  NMR (100 MHz,  $\text{CDCl}_3$ ): 170.88, 158.22, 145.64, 142.19, 130.31, 129.65, 129.08, 119.63, 113.88, 64.44, 61.70, 55.23, 37.52, 14.02, 13.06. IR ( $\text{cm}^{-1}$ ): 2979, 2836, 1731, 1604, 1510, 1463, 1443, 1387, 1365, 1251, 1178, 1140, 1064, 1033, 871, 827, 801, 768. HRMS (ESI)  $m/z$  calcd for  $\text{C}_{20}\text{H}_{24}\text{O}_5\text{Na}^+$  ( $\text{M}+\text{Na}$ ) $^+$  367.15159, found 367.15125.

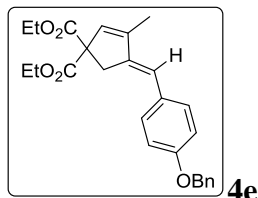

diethyl 3-(4-(benzyloxy)benzyl)-4-methylcyclopenta-2,4-diene-1,1-dicarboxylate, M.P.= 101-103 °C, 52%, white solid, 22 mg.

$^1\text{H}$  NMR (400 MHz,  $\text{CDCl}_3$ ): 7.45 – 7.32 (m, 7H), 6.97 (d,  $J = 8.8$  Hz, 2H), 6.24 (s, 1H), 5.92 (s, 1H), 5.07 (s, 2H), 4.20 (q,  $J = 7.0$  Hz, 4H), 3.46 (s, 2H), 1.93 (s, 3H), 1.26 (t,  $J = 7.1$  Hz, 6H).  $^{13}\text{C}$  NMR (100 MHz,  $\text{CDCl}_3$ ): 170.86, 157.43, 145.62, 142.31, 136.87, 130.57, 129.65, 129.15, 128.55, 127.94, 127.44, 119.61, 114.83, 69.96, 64.45, 61.70, 37.53, 14.02, 13.04. IR ( $\text{cm}^{-1}$ ): 3032, 2979, 2936, 1730, 1602, 1508, 1453, 1384, 1365, 1248, 1177, 1139, 1064, 1012, 870, 826, 737, 697, 626. HRMS (ESI)  $m/z$  calcd for  $\text{C}_{26}\text{H}_{28}\text{O}_5\text{Na}^+$  ( $\text{M}+\text{Na}$ ) $^+$  443.18290, found 443.18268.

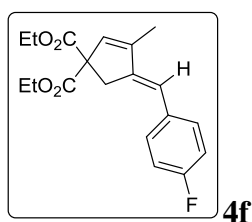

diethyl 3-(4-fluorobenzyl)-4-methylcyclopenta-2,4-diene-1,1-dicarboxylate, oil, 50%, 16.6 mg.

$^1\text{H}$  NMR (400 MHz,  $\text{CDCl}_3$ ): 7.41 – 7.34 (m, 2H), 7.04 (t,  $J = 8.7$  Hz, 2H), 6.26 (s, 1H), 5.98 (s, 1H), 4.21 (q,  $J = 7.0$  Hz, 4H), 3.44 (s, 2H), 1.94 (s, 3H), 1.27 (t,  $J = 7.1$  Hz, 6H).  $^{13}\text{C}$  NMR (100 MHz,  $\text{CDCl}_3$ ): 170.71, 162.58 (d,  $J = 245.0$  Hz), 160.13, 145.39, 143.97, 143.95, 133.67 (d,  $J = 3.0$  Hz), 133.64, 130.12, 129.93 (d,  $J = 7.0$  Hz), 129.86, 119.02, 115.47 (d,  $J = 22.0$  Hz), 115.25, 64.41, 61.80, 37.43, 14.02, 13.02.  $^{19}\text{F}$  NMR (376 MHz,  $\text{CDCl}_3$ ): -115.08 (s). IR ( $\text{cm}^{-1}$ ): 2980, 2937, 1731, 1599, 1507, 1445, 1387, 1366, 1249, 1182, 1159, 1140, 1095, 1064, 1011, 871, 828, 804, 779, 711. HRMS (ESI)  $m/z$  calcd for  $\text{C}_{19}\text{H}_{21}\text{FO}_4\text{Na}^+$  ( $\text{M}+\text{Na}$ ) $^+$  355.13161, found 355.13166.

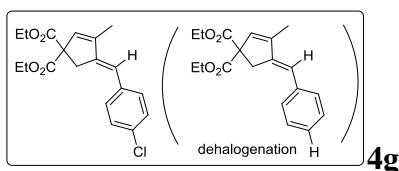

diethyl 3-(4-chlorobenzyl)-4-methylcyclopenta-2,4-diene-1,1-dicarboxylate, oil, 54%, 19 mg, main product:by-product=5.2:1.

$^1\text{H}$  NMR (400 MHz,  $\text{CDCl}_3$ ): 7.44 – 7.28 (m, 4H), 6.25 (s, 1H), 6.00 (s, 1H), 4.21 (q,  $J = 7.1$  Hz, 4H), 3.44 (s, 2H), 1.94 (d,  $J = 5.2$  Hz, 3H), 1.27 (t,  $J = 7.1$  Hz, 6H).  $^{13}\text{C}$

NMR (100 MHz, CDCl<sub>3</sub>): 170.61, 145.35, 145.02, 135.96, 132.10, 130.68, 130.14, 129.54, 128.58, 128.43, 128.38, 126.54, 120.18, 118.99, 64.45, 61.82, 61.75, 37.51, 14.02, 13.00. IR (cm<sup>-1</sup>): 2979, 1731, 1630, 1490, 1444, 1386, 1365, 1250, 1215, 1183, 1141, 1093, 1064, 1010, 870, 754, 694. HRMS (ESI) m/z calcd for C<sub>19</sub>H<sub>21</sub>ClO<sub>4</sub>Na<sup>+</sup> (M+Na)<sup>+</sup> 371.10206, found 371.10217.

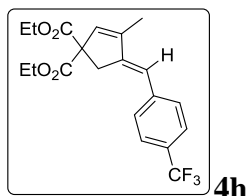

diethyl 3-methyl-4-(4-(trifluoromethyl)benzyl)cyclopenta-2,4-diene-1,1-dicarboxylate, oil, 61%, 23 mg. <sup>1</sup>H NMR (400 MHz, CDCl<sub>3</sub>): 7.60 (d, *J* = 8.3 Hz, 2H), 7.50 (d, *J* = 8.2 Hz, 2H), 6.32 (s, 1H), 6.06 (s, 1H), 4.22 (q, *J* = 7.1 Hz, 4H), 3.48 (s, 2H), 1.96 (s, 3H), 1.27 (t, *J* = 7.1 Hz, 6H). <sup>13</sup>C NMR (100 MHz, CDCl<sub>3</sub>): 170.49, 147.01, 145.26, 140.98, 131.74, 128.40, 128.25 (q, *J* = 270.0 Hz), 125.54, 125.40 (q, *J* = 4.0 Hz), 125.37, 125.33, 125.29, 122.84, 120.15, 118.90, 64.49, 61.91, 37.61, 14.02, 13.00. <sup>19</sup>F NMR (376 MHz, CDCl<sub>3</sub>): -62.40 (s). IR (cm<sup>-1</sup>): 2981, 1732, 1610, 1445, 1366, 1325, 1251, 1164, 1121, 1067, 1014, 875, 829, 801. HRMS (ESI) m/z calcd for C<sub>20</sub>H<sub>21</sub>F<sub>3</sub>O<sub>4</sub>Na<sup>+</sup> (M+Na)<sup>+</sup> 405.12841, found 405.12857.

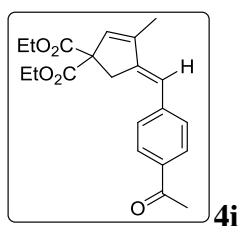

diethyl 3-(4-acetylbenzyl)-4-methylcyclopenta-2,4-diene-1,1-dicarboxylate, M.P.= 118-120 °C, 66%, white solid, 23.5 mg. <sup>1</sup>H NMR (400 MHz, CDCl<sub>3</sub>): 7.95 (d, *J* = 8.3 Hz, 2H), 7.49 (d, *J* = 8.3 Hz, 2H), 6.34 (s, 1H), 6.08 (s, 1H), 4.22 (q, *J* = 7.1 Hz, 4H), 3.50 (s, 2H), 2.60 (s, 3H), 1.96 (s, 3H), 1.28 (t, *J* = 7.1 Hz, 6H). <sup>13</sup>C NMR (100 MHz, CDCl<sub>3</sub>): 197.45, 170.41, 147.35, 145.34, 142.23, 134.78, 131.90, 128.55, 128.30, 119.30, 64.49, 61.85, 37.73, 26.49, 13.97, 12.95. IR (cm<sup>-1</sup>): 2980, 2937, 1731, 1680, 1598, 1558, 1444, 1411, 1360, 1252, 1218, 1184, 1141, 1094, 1064, 1011, 956, 876, 800, 713. HRMS (ESI) m/z calcd for C<sub>21</sub>H<sub>24</sub>O<sub>5</sub>Na<sup>+</sup> (M+Na)<sup>+</sup> 379.15159, found 379.15149.

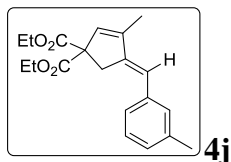

diethyl 3-methyl-4-(3-methylbenzyl)cyclopenta-2,4-diene-1,1-dicarboxylate, M.P.= 69-71 °C, 67%, white solid, 22 mg. <sup>1</sup>H NMR (400 MHz, CDCl<sub>3</sub>): 7.23 (t, *J* = 6.4 Hz, 3H), 7.03 (d, *J* = 6.4 Hz, 1H), 6.27 (s, 1H), 5.96 (s, 1H), 4.21 (q, *J* = 7.1 Hz, 4H), 3.48 (s, 2H), 2.37 (s, 3H), 1.94 (s, 3H), 1.27 (t, *J* = 7.1 Hz, 6H). <sup>13</sup>C NMR (100 MHz, CDCl<sub>3</sub>): 170.81, 145.59, 144.13, 137.95, 137.43, 129.97, 129.16, 128.32, 127.39, 125.46, 120.29, 64.46, 61.73, 37.55,



21.49, 14.02, 13.05. IR (cm<sup>-1</sup>): 2979, 1732, 1600, 1445, 1385, 1365, 1249, 1208, 1182, 1139, 1094, 1064, 1011, 905, 861, 778, 694. HRMS (ESI) m/z calcd for C<sub>20</sub>H<sub>24</sub>O<sub>4</sub>Na<sup>+</sup> (M+Na)<sup>+</sup> 351.15668, found 351.15659.

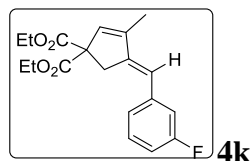

diethyl 3-(3-fluorobenzyl)-4-methylcyclopenta-2,4-diene-1,1-dicarboxylate, M.P.= 54-56 °C, 61%, white solid, 20 mg.

<sup>1</sup>H NMR (400 MHz, CDCl<sub>3</sub>): 7.29 (dd, *J* = 13.8, 5.8 Hz, 1H), 7.14 (dd, *J* = 23.7, 9.2 Hz, 2H), 6.91 (t, *J* = 8.1 Hz, 1H), 6.26 (s, 1H), 6.02 (s, 1H), 4.21 (q, *J* = 7.0 Hz, 4H), 3.46 (s, 2H), 1.94 (s, 3H), 1.27 (t, *J* = 7.1 Hz, 6H). <sup>13</sup>C NMR (100 MHz, CDCl<sub>3</sub>): 170.56, 164.09 (d, *J* = 243.0 Hz), 161.66, 145.76 (d, *J* = 48.0 Hz), 145.28, 139.74 (d, *J* = 7.0 Hz), 139.67, 131.09, 129.83 (d, *J* = 9.0 Hz), 129.74, 124.25 (d, *J* = 3.0 Hz), 124.22, 119.15 (d, *J* = 2.0 Hz), 119.13, 114.85 (d, *J* = 22.0 Hz), 114.63, 113.46 (d, *J* = 21.0 Hz), 113.25, 64.47, 61.82, 37.53, 14.01, 12.98. <sup>19</sup>F NMR (376 MHz, CDCl<sub>3</sub>): -113.36 (s). IR (cm<sup>-1</sup>): 2980, 2938, 1731, 1606, 1579, 1484, 1444, 1387, 1366, 1248, 1209, 1183, 1142, 1095, 1064, 1009, 952, 872, 779, 686. HRMS (ESI) m/z calcd for C<sub>19</sub>H<sub>21</sub>FO<sub>4</sub>Na<sup>+</sup> (M+Na)<sup>+</sup> 355.13161, found 355.13177.

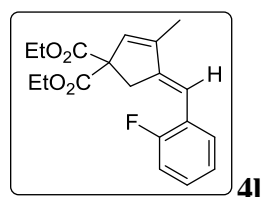

diethyl 3-(2-fluorobenzyl)-4-methylcyclopenta-2,4-diene-1,1-dicarboxylate, oil, 68%, 22.5 mg.

<sup>1</sup>H NMR (400 MHz, CDCl<sub>3</sub>): 7.52 (t, *J* = 8.6 Hz, 1H), 7.16 (dt, *J* = 20.5, 7.0 Hz, 2H), 7.08 – 7.02 (m, 1H), 6.48 (s, 1H), 6.02 (s, 1H), 4.21 (q, *J* = 7.1 Hz, 4H), 3.43 (s, 2H), 1.96 (s, 3H), 1.27 (t, *J* = 7.1 Hz, 6H). <sup>13</sup>C NMR (100 MHz, CDCl<sub>3</sub>): 170.62, 161.47 (d, *J* = 247.0 Hz), 159.00, 146.16, 146.14, 145.48, 130.92, 128.56 (d, *J* = 3.0 Hz), 128.53, 128.11 (d, *J* = 8.0 Hz), 128.03, 125.44 (d, *J* = 12.0 Hz), 125.32, 123.86 (d, *J* = 4.0 Hz), 123.82, 115.46 (d, *J* = 22.0 Hz), 115.24, 111.59 (d, *J* = 5.0 Hz), 111.54, 64.35, 61.78, 37.38, 14.00, 12.98. <sup>19</sup>F NMR (376 MHz, CDCl<sub>3</sub>): -116.43 (s). IR (cm<sup>-1</sup>): 2980, 1732, 1484, 1446, 1388, 1366, 1250, 1212, 1181, 1141, 1095, 1065, 873, 793, 754. HRMS (ESI) m/z calcd for C<sub>19</sub>H<sub>21</sub>FO<sub>4</sub>Na<sup>+</sup> (M+Na)<sup>+</sup> 355.13161, found 355.13202.

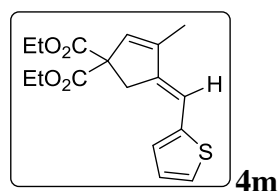

diethyl 3-methyl-4-(thiophen-2-ylmethyl)cyclopenta-2,4-diene-1,1-dicarboxylate, M.P.= 50-52 °C 55%, yellow solid, 17.6 mg.

<sup>1</sup>H NMR (400 MHz, CDCl<sub>3</sub>): 7.28 (d, *J* = 5.9 Hz, 1H), 7.05 (d, *J* = 4.6 Hz, 2H), 6.53 (s, 1H), 5.98 (s, 1H), 4.25 – 4.19 (m, 4H), 3.41 (s, 2H), 1.93 (s, 3H), 1.27 (t, *J* = 7.1

Hz, 6H).  $^{13}\text{C}$  NMR (100 MHz,  $\text{CDCl}_3$ ): 170.64, 144.83, 142.81, 141.73, 130.66, 127.25, 126.60, 125.05, 113.26, 64.48, 61.77, 37.67, 14.02, 12.86. IR ( $\text{cm}^{-1}$ ): 3105, 2979, 2936, 1731, 1444, 1385, 1366, 1248, 1200, 1181, 1139, 1094, 1051, 862, 698. HRMS (ESI)  $m/z$  calcd for  $\text{C}_{17}\text{H}_{20}\text{O}_4\text{SNa}^+$  ( $\text{M}+\text{Na}$ ) $^+$  343.09745, found 343.09738.

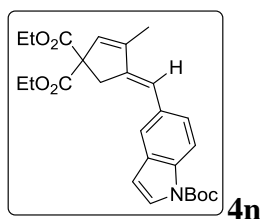

Diethyl-3-methyl-4-((1-methyl-1H-indol-5-yl)methyl)cyclopenta-2,4-diene-1,1-dicarboxylate, oil, 46%, 20.8 mg.

$^1\text{H}$  NMR (400 MHz,  $\text{CDCl}_3$ ): 8.09 (d,  $J = 7.8$  Hz, 1H), 7.61 (d,  $J = 16.0$  Hz, 2H), 7.36 (d,  $J = 8.7$  Hz, 1H), 6.58 (d,  $J = 3.7$  Hz, 1H), 6.41 (s, 1H), 5.96 (s, 1H), 4.22 (q,  $J = 7.0$  Hz, 4H), 3.55 (s, 2H), 1.97 (s, 3H), 1.68 (s, 9H), 1.27 (t,  $J = 7.1$  Hz, 6H).  $^{13}\text{C}$  NMR (100 MHz,  $\text{CDCl}_3$ ): 170.92, 149.67, 145.68, 143.01, 133.78, 132.24, 130.84, 129.38, 126.35, 125.39, 120.55, 120.42, 115.01, 107.47, 83.71, 64.49, 61.74, 37.63, 28.16, 14.03, 13.10. IR ( $\text{cm}^{-1}$ ): 2978, 2934, 1732, 1466, 1369, 1251, 1163, 1131, 1083, 1023, 857, 765, 727. HRMS (ESI)  $m/z$  calcd for  $\text{C}_{26}\text{H}_{31}\text{NO}_6\text{Na}^+$  ( $\text{M}+\text{Na}$ ) $^+$  476.20436, found 476.20480.

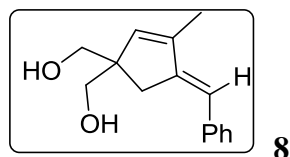

(3-benzyl-4-methylcyclopenta-2,4-diene-1,1-diyl)dimethanol, M.P.= 100-102  $^\circ\text{C}$ , 78%, white solid, 27 mg.

$^1\text{H}$  NMR (400 MHz,  $\text{CDCl}_3$ ): 7.40 (d,  $J = 6.9$  Hz, 2H), 7.33 (t,  $J = 7.7$  Hz, 2H), 7.18 (t,  $J = 7.3$  Hz, 1H), 6.26 (s, 1H), 5.80 (s, 1H), 3.70 – 3.61 (m, 4H), 2.77 (s, 2H), 2.52 (s, 2H), 1.91 (s, 3H).  $^{13}\text{C}$  NMR (100 MHz,  $\text{CDCl}_3$ ): 146.71, 144.65, 138.05, 134.96, 128.39, 128.22, 126.19, 119.17, 68.67, 54.20, 36.86, 13.23. IR ( $\text{cm}^{-1}$ ): 3356, 3022, 2917, 2871, 1626, 1594, 1489, 1444, 1383, 1196, 1077, 1026, 909, 863, 750, 693, 617.

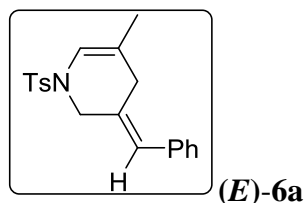

(E)-3-benzylidene-5-methyl-1-tosyl-1,2,3,4-tetrahydropyridine, M.P.= 115-117  $^\circ\text{C}$ , 51.3%, white solid, 35 mg.

$^1\text{H}$  NMR (400 MHz,  $\text{CDCl}_3$ ): 7.69 (d,  $J = 8.3$  Hz, 2H), 7.34 – 7.28 (m, 4H), 7.23 (t,  $J = 7.9$  Hz, 1H), 7.03 (d,  $J = 7.2$  Hz, 2H), 6.49 (s, 1H), 6.22 (s, 1H), 4.00 (s, 2H), 2.80 (s, 2H), 2.41 (s, 3H), 1.68 (s, 3H).  $^{13}\text{C}$  NMR (100 MHz,  $\text{CDCl}_3$ ): 143.48, 136.57, 135.20, 129.73, 129.54, 128.67, 128.12, 127.34, 127.15, 126.90, 120.50, 118.82, 51.07, 31.51, 21.49, 20.37. IR ( $\text{cm}^{-1}$ ): 3054, 3025, 2961, 2919, 2852, 1675, 1597,

1492, 1446, 1348, 1304, 1209, 1164, 1090, 1055, 1030, 973, 915, 865, 813, 748, 700, 670.

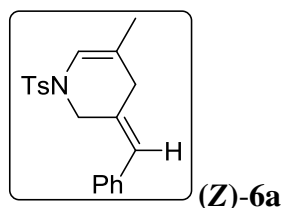

(Z)-3-benzylidene-5-methyl-1-tosyl-1,2,3,4-tetrahydropyridine, M.P.= 116-118 °C, 19.7%, white solid, 13 mg.

<sup>1</sup>H NMR (400 MHz, CDCl<sub>3</sub>): 7.71 (d, *J* = 8.3 Hz, 2H), 7.30 (tt, *J* = 13.5, 7.2 Hz, 5H), 7.09 (d, *J* = 7.2 Hz, 2H), 6.25 (d, *J* = 4.8 Hz, 2H), 3.93 (s, 2H), 3.79 (s, 2H), 2.43 (s, 3H), 1.75 (s, 3H). <sup>13</sup>C NMR (100 MHz, CDCl<sub>3</sub>): 143.49, 136.21, 135.10, 134.02, 129.48, 129.26, 128.95, 128.08, 127.66, 126.78, 124.55, 119.97, 49.64, 49.42, 20.78. IR (cm<sup>-1</sup>): 3023, 2958, 2923, 2852, 1734, 1647, 1596, 1493, 1448, 1346, 1162, 1092, 1030, 961, 894, 814, 751, 700, 672, 600.

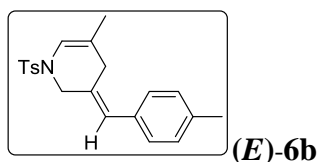

(E)-5-methyl-3-(4-methylbenzylidene)-1-tosyl-1,2,3,4-tetrahydropyridine, oil, 42.7%, 30 mg.

<sup>1</sup>H NMR (400 MHz, CDCl<sub>3</sub>): 7.69 (d, *J* = 8.3 Hz, 2H), 7.29 (d, *J* = 8.0 Hz, 2H), 7.13 (d, *J* = 7.9 Hz, 2H), 6.94 (d, *J* = 8.0 Hz, 2H), 6.49 (s, 1H), 6.18 (s, 1H), 4.00 (s, 2H), 2.81 (s, 2H), 2.41 (s, 3H), 2.35 (s, 3H), 1.69 (s, 3H). <sup>13</sup>C NMR (100 MHz, CDCl<sub>3</sub>): 143.40, 136.64, 135.15, 133.62, 129.48, 128.90, 128.76, 128.54, 127.27, 127.00, 120.40, 118.88, 51.04, 31.49, 21.44, 21.08, 20.33. IR (cm<sup>-1</sup>): 3026, 2966, 2920, 2858, 2735, 1679, 1597, 1575, 1511, 1493, 1448, 1347, 1266, 1210, 1162, 1091, 1054, 974, 914, 870, 814, 736, 704, 671, 626. HRMS (ESI) *m/z* calcd for C<sub>21</sub>H<sub>23</sub>NO<sub>2</sub>SNa<sup>+</sup> (M+Na)<sup>+</sup> 376.13417, found 376.13425.

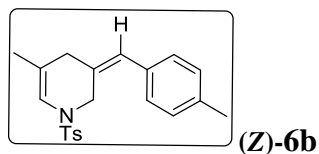

(Z)-5-methyl-3-(4-methylbenzylidene)-1-tosyl-1,2,3,4-tetrahydropyridine, M.P.= 115-117 °C, 14.3%, white solid, 10 mg.

<sup>1</sup>H NMR (400 MHz, CDCl<sub>3</sub>): 7.71 (d, *J* = 8.2 Hz, 2H), 7.28 (d, *J* = 8.1 Hz, 2H), 7.14 (d, *J* = 7.9 Hz, 2H), 6.99 (d, *J* = 8.0 Hz, 2H), 6.26 (s, 1H), 6.21 (s, 1H), 3.92 (s, 2H), 3.78 (s, 2H), 2.43 (s, 3H), 2.36 (s, 3H), 1.74 (s, 3H). <sup>13</sup>C NMR (100 MHz, CDCl<sub>3</sub>): 143.46, 136.60, 134.65, 134.16, 133.37, 129.47, 128.90, 128.82, 128.70, 127.69, 124.57, 120.16, 49.70, 49.44, 21.47, 21.15, 20.77. IR (cm<sup>-1</sup>): 3022, 2920, 2733, 1913, 1646, 1597, 1509, 1493, 1450, 1377, 1345, 1304, 1162, 1092, 1037, 1017, 960, 898, 854, 814, 737, 712, 671, 652, 629. HRMS (ESI) *m/z* calcd for C<sub>21</sub>H<sub>23</sub>NO<sub>2</sub>SNa<sup>+</sup> (M+Na)<sup>+</sup> 376.13417, found 376.13425.

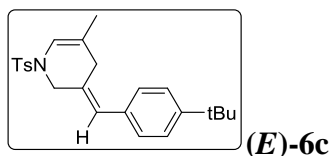

(E)-3-(4-(tert-butyl)benzylidene)-5-methyl-1-tosyl-1,2,3,4-tetrahydropyridine, oil, 51.0%, 39.8 mg.

$^1\text{H}$  NMR (400 MHz,  $\text{CDCl}_3$ ): 7.70 (d,  $J = 8.3$  Hz, 2H), 7.35 (d,  $J = 8.4$  Hz, 2H), 7.30 (d,  $J = 8.1$  Hz, 2H), 7.00 (d,  $J = 8.3$  Hz, 2H), 6.48 (s, 1H), 6.20 (s, 1H), 4.00 (s, 2H), 2.83 (s, 2H), 2.42 (s, 3H), 1.69 (s, 3H), 1.34 (s, 9H).  $^{13}\text{C}$  NMR (100 MHz,  $\text{CDCl}_3$ ): 149.90, 143.42, 135.21, 133.71, 129.53, 129.08, 128.43, 127.30, 126.94, 125.03, 120.41, 118.78, 51.11, 34.50, 31.56, 21.48, 20.36. IR ( $\text{cm}^{-1}$ ): 3051, 2962, 2867, 1734, 1674, 1599, 1508, 1494, 1460, 1407, 1347, 1304, 1267, 1231, 1164, 1121, 1091, 1053, 1033, 1010, 974, 914, 873, 835, 814, 768, 736, 705, 670, 622. HRMS (ESI)  $m/z$  calcd for  $\text{C}_{24}\text{H}_{29}\text{NO}_2\text{SNa}^+$  ( $\text{M}+\text{Na}$ ) $^+$  418.18112, found 418.18134.

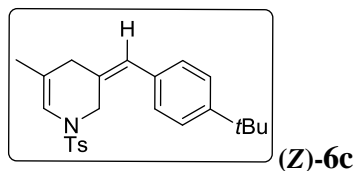

(Z)-3-(4-(tert-butyl)benzylidene)-5-methyl-1-tosyl-1,2,3,4-tetrahydropyridine, M.P.= 141-143 °C, 16%, white solid, 12.5 mg.

$^1\text{H}$  NMR (400 MHz,  $\text{CDCl}_3$ ): 7.71 (d,  $J = 8.3$  Hz, 2H), 7.35 (d,  $J = 8.4$  Hz, 2H), 7.29 (d,  $J = 8.0$  Hz, 2H), 7.05 (d,  $J = 8.3$  Hz, 2H), 6.30 (s, 1H), 6.22 (s, 1H), 3.92 (s, 2H), 3.78 (s, 2H), 2.43 (s, 3H), 1.75 (s, 3H), 1.34 (s, 9H).  $^{13}\text{C}$  NMR (100 MHz,  $\text{CDCl}_3$ ): 149.82, 143.45, 134.62, 134.13, 133.41, 129.49, 128.78, 128.72, 127.70, 125.04, 124.49, 120.25, 49.71, 49.44, 34.52, 31.26, 21.47, 20.76. IR ( $\text{cm}^{-1}$ ): 3026, 2961, 2867, 1647, 1597, 1507, 1493, 1450, 1394, 1377, 1347, 1304, 1267, 1226, 1163, 1092, 1037, 1016, 961, 899, 851, 814, 784, 755, 738, 707, 671, 648, 627. HRMS (ESI)  $m/z$  calcd for  $\text{C}_{24}\text{H}_{29}\text{NO}_2\text{SNa}^+$  ( $\text{M}+\text{Na}$ ) $^+$  418.18112, found 418.18134.

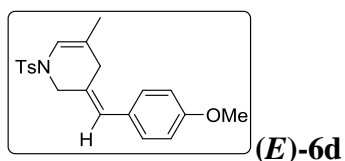

(E)-3-(4-methoxybenzylidene)-5-methyl-1-tosyl-1,2,3,4-tetrahydropyridine, oil, 36.3%, 26.9 mg.

$^1\text{H}$  NMR (400 MHz,  $\text{CDCl}_3$ ): 7.69 (d,  $J = 8.3$  Hz, 2H), 7.29 (d,  $J = 8.0$  Hz, 2H), 6.99 (d,  $J = 8.7$  Hz, 2H), 6.85 (d,  $J = 6.8$  Hz, 2H), 6.48 (s, 1H), 6.16 (s, 1H), 3.97 (s, 2H), 3.82 (s, 3H), 2.79 (s, 2H), 2.41 (s, 3H), 1.68 (s, 3H).  $^{13}\text{C}$  NMR (100 MHz,  $\text{CDCl}_3$ ): 158.44, 143.42, 135.23, 129.92, 129.52, 129.15, 128.13, 127.34, 126.68, 120.50, 118.79, 113.55, 55.24, 51.10, 31.54, 21.51, 20.41. IR ( $\text{cm}^{-1}$ ): 3062, 2960, 2929, 2837, 1699, 1661, 1597, 1572, 1510, 1455, 1422, 1344, 1305, 1250, 1162, 1121, 1091, 1032, 1009, 973, 914, 836, 816, 761, 735, 705, 670, 622. HRMS (ESI)  $m/z$  calcd for  $\text{C}_{21}\text{H}_{23}\text{NO}_3\text{SNa}^+$  ( $\text{M}+\text{Na}$ ) $^+$  392.12909, found 392.12903.

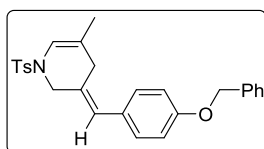

**(E)-6e**

(E)-3-(4-(benzyloxy)benzylidene)-5-methyl-1-tosyl-1,2,3,4-tetrahydropyridine, oil, 48%, 43 mg.

$^1\text{H}$  NMR (400 MHz,  $\text{CDCl}_3$ ): 7.69 (d,  $J = 8.3$  Hz, 2H), 7.46 – 7.35 (m, 5H), 7.29 (d,  $J = 8.1$  Hz, 2H), 6.99 (d,  $J = 8.7$  Hz, 2H), 6.93 (d,  $J = 8.8$  Hz, 2H), 6.48 (s, 1H), 6.16 (s, 1H), 5.08 (s, 2H), 3.98 (s, 2H), 2.80 (s, 2H), 2.40 (s, 3H), 1.69 (s, 3H).  $^{13}\text{C}$  NMR (100 MHz,  $\text{CDCl}_3$ ): 157.64, 143.41, 136.80, 135.21, 129.93, 129.51, 129.40, 128.59, 128.20, 128.01, 127.42, 127.32, 126.64, 120.50, 118.78, 114.47, 69.98, 51.10, 31.53, 21.49, 20.40. IR ( $\text{cm}^{-1}$ ): 3062, 3032, 2920, 1675, 1603, 1572, 1508, 1453, 1380, 1346, 1293, 1245, 1164, 1119, 1091, 1053, 1033, 973, 914, 872, 833, 814, 736, 697, 670, 629, 608. HRMS (ESI)  $m/z$  calcd for  $\text{C}_{27}\text{H}_{27}\text{NO}_3\text{SNa}^+$  ( $\text{M}+\text{Na}$ ) $^+$  468.16039, found 468.16049.

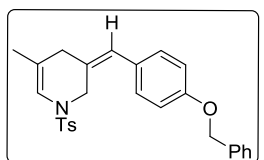

**(Z)-6e**

(Z)-3-(4-(benzyloxy)benzylidene)-5-methyl-1-tosyl-1,2,3,4-tetrahydropyridine, M.P.= 83-85 °C, 16%, white solid, 14 mg.

$^1\text{H}$  NMR (400 MHz,  $\text{CDCl}_3$ ): 7.71 (d,  $J = 8.2$  Hz, 2H), 7.44 (dt,  $J = 14.6, 7.2$  Hz, 5H), 7.28 (d,  $J = 7.4$  Hz, 2H), 7.04 (d,  $J = 8.7$  Hz, 2H), 6.94 (d,  $J = 8.8$  Hz, 2H), 6.25 (s, 1H), 6.18 (s, 1H), 5.09 (s, 2H), 3.91 (s, 2H), 3.78 (s, 2H), 2.41 (s, 3H), 1.75 (s, 3H).  $^{13}\text{C}$  NMR (100 MHz,  $\text{CDCl}_3$ ): 157.70, 143.43, 136.85, 134.48, 134.17, 130.21, 129.45, 129.10, 128.58, 128.03, 127.98, 127.68, 127.42, 124.19, 120.12, 114.49, 69.98, 49.75, 49.47, 21.46, 20.77. IR ( $\text{cm}^{-1}$ ): 3031, 2923, 1917, 1646, 1603, 1571, 1507, 1452, 1378, 1344, 1293, 1245, 1161, 1092, 1017, 959, 899, 847, 814, 775, 737, 697, 673, 656, 628, 614. HRMS (ESI)  $m/z$  calcd for  $\text{C}_{27}\text{H}_{27}\text{NO}_3\text{SNa}^+$  ( $\text{M}+\text{Na}$ ) $^+$  468.16039, found 468.16049.

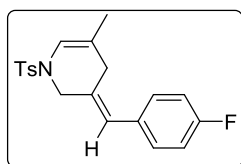

**(E)-6f**

(E)-3-(4-fluorobenzylidene)-5-methyl-1-tosyl-1,2,3,4-tetrahydropyridine, oil, 56.7%, 40 mg.

$^1\text{H}$  NMR (400 MHz,  $\text{CDCl}_3$ ): 7.69 (d,  $J = 8.3$  Hz, 2H), 7.29 (d,  $J = 8.0$  Hz, 2H), 7.00 (d,  $J = 7.1$  Hz, 4H), 6.48 (s, 1H), 6.18 (s, 1H), 3.97 (s, 2H), 2.76 (s, 2H), 2.41 (s, 3H), 1.68 (s, 3H).  $^{13}\text{C}$  NMR (100 MHz,  $\text{CDCl}_3$ ): 162.78 (d,  $J = 245.0$  Hz), 160.33, 143.49, 135.12, 132.55 (d,  $J = 3.0$  Hz), 132.52, 130.28 (d,  $J = 8.0$  Hz), 130.20, 129.71, 129.53, 127.33, 126.06, 120.56, 118.58, 115.16 (d,  $J = 21.0$  Hz), 114.95, 50.96, 31.40, 21.47, 20.34.  $^{19}\text{F}$  NMR (376 MHz,  $\text{CDCl}_3$ ): -114.66 (s). IR ( $\text{cm}^{-1}$ ): 3067, 2922, 1673, 1598,

1507, 1448, 1345, 1305, 1229, 1160, 1121, 1091, 1053, 1033, 1010, 974, 840, 815, 760, 735, 705, 670, 604. HRMS (ESI)  $m/z$  calcd for  $C_{20}H_{20}FNO_2SNa^+$  ( $M+Na$ )<sup>+</sup> 380.10910, found 380.10913.

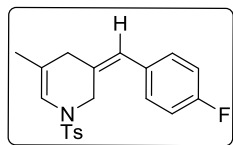

**(Z)-6f**

(Z)-3-(4-fluorobenzylidene)-5-methyl-1-tosyl-1,2,3,4-tetrahydropyridine, M.P.= 98-100 °C, 16.3%, white solid, 11.6 mg.

<sup>1</sup>H NMR (400 MHz, CDCl<sub>3</sub>): 7.70 (d,  $J$  = 8.3 Hz, 2H), 7.28 (d,  $J$  = 8.1 Hz, 2H), 7.08 – 6.97 (m, 4H), 6.19 (s, 2H), 3.91 (s, 2H), 3.78 (s, 2H), 2.42 (s, 3H), 1.76 (s, 3H). <sup>13</sup>C NMR (100 MHz, CDCl<sub>3</sub>): 162.87 (d,  $J$  = 246.0 Hz), 160.41, 143.52, 135.46, 134.10, 132.25 (d,  $J$  = 4.0 Hz), 130.56 (d,  $J$  = 7.0 Hz), 130.49, 129.50, 129.33, 127.69, 123.40, 119.70, 115.15 (d,  $J$  = 21.0 Hz), 114.94, 49.59 (d,  $J$  = 15.0 Hz), 49.44, 21.47, 20.80. <sup>19</sup>F NMR (376 MHz, CDCl<sub>3</sub>): -114.94 (s). IR (cm<sup>-1</sup>): 3041, 2922, 1913, 1681, 1648, 1598, 1506, 1450, 1345, 1227, 1162, 1092, 1037, 1016, 961, 898, 848, 815, 765, 712, 671, 624. HRMS (ESI)  $m/z$  calcd for  $C_{20}H_{20}FNO_2SNa^+$  ( $M+Na$ )<sup>+</sup> 380.10910, found 380.10913.

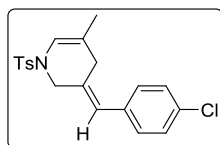

**(E)-6g**

(E)-3-(4-chlorobenzylidene)-5-methyl-1-tosyl-1,2,3,4-tetrahydropyridine, M.P.= 120-122 °C, 50.5%, white solid, 38 mg.

<sup>1</sup>H NMR (400 MHz, CDCl<sub>3</sub>): 7.68 (d,  $J$  = 8.2 Hz, 2H), 7.31 – 7.25 (m, 4H), 6.96 (d,  $J$  = 8.4 Hz, 2H), 6.49 (s, 1H), 6.16 (s, 1H), 3.98 (s, 2H), 2.75 (s, 2H), 2.41 (s, 3H), 1.68 (s, 3H). <sup>13</sup>C NMR (100 MHz, CDCl<sub>3</sub>): 143.49, 135.11, 134.91, 132.65, 130.51, 129.90, 129.52, 128.28, 127.31, 125.95, 120.58, 118.52, 83.45, 50.93, 31.44, 24.97, 21.47, 20.32. IR (cm<sup>-1</sup>): 3064, 2976, 2919, 2855, 1912, 1676, 1596, 1490, 1448, 1348, 1304, 1280, 1210, 1165, 1123, 1090, 1055, 1013, 974, 959, 914, 887, 868, 835, 813, 774, 737, 721, 705, 668, 637, 616. HRMS (ESI)  $m/z$  calcd for  $C_{20}H_{20}ClNO_2SNa^+$  ( $M+Na$ )<sup>+</sup> 396.07955, found 396.07962.

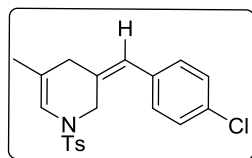

**(Z)-6g**

(Z)-3-(4-chlorobenzylidene)-5-methyl-1-tosyl-1,2,3,4-tetrahydropyridine, M.P.= 130-132 °C, 14.5%, white solid, 11 mg.

<sup>1</sup>H NMR (400 MHz, CDCl<sub>3</sub>): 7.70 (d,  $J$  = 8.3 Hz, 2H), 7.29 (d,  $J$  = 8.4 Hz, 4H), 7.02 (d,  $J$  = 8.4 Hz, 2H), 6.17 (s, 2H), 3.91 (s, 2H), 3.78 (s, 2H), 2.42 (s, 3H), 1.76 (s, 3H). <sup>13</sup>C NMR (100 MHz, CDCl<sub>3</sub>): 143.55, 135.88, 134.67, 134.10, 132.57, 130.22, 129.98, 129.50, 128.29, 127.68, 123.24, 49.57, 49.44, 21.48, 20.82. IR (cm<sup>-1</sup>): 3050, 2965, 2923, 1913, 1734, 1646, 1597, 1489, 1450, 1399, 1377, 1345, 1305, 1265, 1226, 1162,

1091, 1037, 1012, 961, 898, 850, 813, 784, 754, 736, 719, 669, 641, 621. HRMS (ESI)  $m/z$  calcd for  $C_{20}H_{20}ClNO_2SNa^+$  ( $M+Na$ ) $^+$  396.07955, found 396.07962.

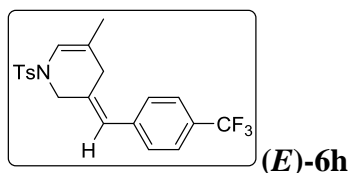

(E)-5-methyl-1-tosyl-3-(4-(trifluoromethyl)benzylidene)-1,2,3,4-tetrahydropyridine, oil, 57%, 46 mg.

$^1H$  NMR (400 MHz,  $CDCl_3$ ): 7.69 (d,  $J = 8.3$  Hz, 2H), 7.56 (d,  $J = 8.2$  Hz, 2H), 7.30 (d,  $J = 8.1$  Hz, 2H), 7.13 (d,  $J = 8.1$  Hz, 2H), 6.50 (s, 1H), 6.24 (s, 1H), 4.01 (s, 2H), 2.78 (s, 2H), 2.41 (s, 3H), 1.69 (s, 3H).  $^{13}C$  NMR (100 MHz,  $CDCl_3$ ): 143.57, 140.09, 135.07, 132.08, 129.56, 129.30 (q,  $J = 32.0$  Hz), 128.98, 128.84, 128.66, 128.34, 128.08 (q,  $J = 270.0$  Hz), 127.32, 125.82, 125.38, 125.08 (q,  $J = 4.0$  Hz), 125.05, 125.01, 124.97, 122.68, 120.63, 119.97, 118.44, 50.90, 31.46, 21.44, 20.25.  $^{19}F$  NMR (376 MHz,  $CDCl_3$ ): -62.52 (s). IR ( $cm^{-1}$ ): 3065, 2967, 2923, 2856, 1922, 1734, 1679, 1615, 1597, 1575, 1494, 1448, 1411, 1324, 1267, 1164, 1123, 1067, 1016, 974, 958, 914, 871, 839, 814, 736, 705, 636, 611. HRMS (ESI)  $m/z$  calcd for  $C_{21}H_{20}F_3NO_2SNa^+$  ( $M+Na$ ) $^+$  430.10591, found 430.10617.

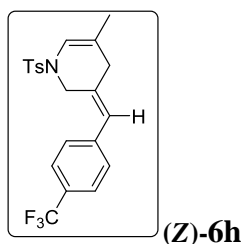

(Z)-5-methyl-1-tosyl-3-(4-(trifluoromethyl)benzylidene)-1,2,3,4-tetrahydropyridine, M.P.= 133-135 °C, 18%, white solid, 15 mg.

$^1H$  NMR (400 MHz,  $CDCl_3$ ): 7.71 (d,  $J = 8.2$  Hz, 2H), 7.57 (d,  $J = 8.2$  Hz, 2H), 7.29 (d,  $J = 8.3$  Hz, 2H), 7.20 (d,  $J = 8.1$  Hz, 2H), 6.24 (s, 1H), 6.20 (s, 1H), 3.94 (s, 2H), 3.80 (s, 2H), 2.43 (s, 3H), 1.77 (s, 3H).  $^{13}C$  NMR (100 MHz,  $CDCl_3$ ): 143.65, 139.87, 136.81, 134.06, 131.32, 129.56, 129.15, 128.54, 128.19 (q,  $J = 270.0$  Hz), 127.70, 125.49, 125.11 (q,  $J = 4.0$  Hz), 125.07, 125.03, 124.99, 122.98, 122.78, 120.08, 119.47, 49.50, 49.43, 21.49, 20.86.  $^{19}F$  NMR (376 MHz,  $CDCl_3$ ): -62.47 (s). IR ( $cm^{-1}$ ): 2924, 2852, 1923, 1735, 1647, 1612, 1597, 1493, 1450, 1412, 1378, 1324, 1265, 1226, 1162, 1121, 1092, 1067, 1038, 1015, 952, 899, 872, 853, 814, 787, 766, 735, 706, 676, 662, 635, 619. HRMS (ESI)  $m/z$  calcd for  $C_{21}H_{20}F_3NO_2SNa^+$  ( $M+Na$ ) $^+$  430.10591, found 430.10617.

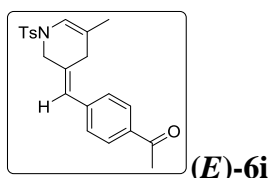

(E)-1-(4-((5-methyl-1-tosyl-1,4-dihydropyridin-3(2H)-ylidene)methyl)phenyl)ethan-1-one (E/Z=2:1), 45%, 34 mg.

$^1\text{H}$  NMR (400 MHz,  $\text{CDCl}_3$ ): 7.91 (dd,  $J = 8.3, 4.5$  Hz, 2H), 7.70 (t,  $J = 7.5$  Hz, 2H), 7.29 (d,  $J = 5.1$  Hz, 2H), 7.15 (dd,  $J = 25.7, 8.3$  Hz, 2H), 6.24 (s, 2H), 4.01 (s, 1H), 3.94 (s, 1H), 3.79 (s, 1H), 2.80 (q,  $J = 1.7$  Hz, 1H), 2.61 (d,  $J = 3.7$  Hz, 3H), 2.42 (d,  $J = 5.6$  Hz, 3H), 1.68 (d,  $J = 4.0$  Hz, 3H).  $^{13}\text{C}$  NMR (100 MHz,  $\text{CDCl}_3$ ): 197.54, 143.64, 141.23, 136.82, 135.29, 134.05, 131.41, 129.54, 129.07, 128.78, 128.23, 127.68, 127.33, 126.25, 123.41, 120.64, 119.68, 50.99, 49.58, 49.43, 31.65, 26.54, 21.51, 20.88, 20.32. IR ( $\text{cm}^{-1}$ ): 3052, 2921, 1679, 1599, 1558, 1493, 1449, 1410, 1345, 1304, 1267, 1162, 11119, 1091, 1015, 959, 872, 853, 814, 786, 736, 705, 671, 626. HRMS (ESI)  $m/z$  calcd for  $\text{C}_{22}\text{H}_{23}\text{NO}_3\text{SNa}^+$  ( $\text{M}+\text{Na}$ ) $^+$  404.12909, found 404.12921.

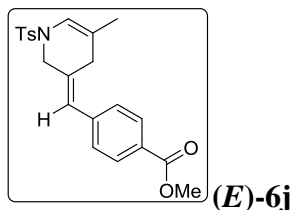

methyl (E)-4-((5-methyl-1-tosyl-1,4-dihydropyridin-3(2H)-ylidene)methyl)benzoate, M.P.= 110-112  $^{\circ}\text{C}$ , 29.5%, yellow solid, 23 mg.

$^1\text{H}$  NMR (400 MHz,  $\text{CDCl}_3$ ): 7.97 (d,  $J = 8.3$  Hz, 2H), 7.69 (d,  $J = 8.3$  Hz, 2H), 7.29 (d,  $J = 7.0$  Hz, 2H), 7.08 (d,  $J = 8.2$  Hz, 2H), 6.49 (s, 1H), 6.22 (s, 1H), 4.01 (s, 2H), 3.93 (s, 3H), 2.79 (s, 2H), 2.41 (s, 3H), 1.69 (s, 3H).  $^{13}\text{C}$  NMR (100 MHz,  $\text{CDCl}_3$ ): 166.72, 143.56, 141.17, 135.18, 131.98, 129.56, 129.41, 128.58, 127.34, 126.31, 120.68, 118.54, 52.09, 51.02, 31.62, 21.49, 20.30. IR ( $\text{cm}^{-1}$ ): 2950, 2920, 2853, 1932, 1719, 1605, 1565, 1493, 1435, 1413, 1348, 1279, 1165, 1105, 1055, 1017, 973, 913, 814, 761, 735, 707, 664, 614. HRMS (ESI)  $m/z$  calcd for  $\text{C}_{22}\text{H}_{23}\text{NO}_4\text{SNa}^+$  ( $\text{M}+\text{Na}$ ) $^+$  420.12400, found 420.12405.

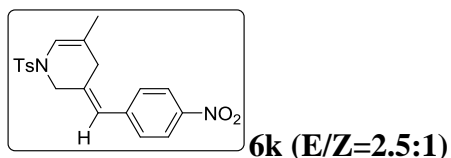

(E)-5-methyl-3-(4-nitrobenzylidene)-1-tosyl-1,2,3,4-tetrahydropyridine, 65%, yellow solid, 50 mg.

$^1\text{H}$  NMR (400 MHz,  $\text{CDCl}_3$ ): 8.16 (d,  $J = 8.8$  Hz, 2H), 7.69 (d,  $J = 8.2$  Hz, 2H), 7.30 (d,  $J = 8.1$  Hz, 2H), 7.18 (d,  $J = 8.7$  Hz, 2H), 6.50 (s, 1H), 6.27 (s, 1H), 4.01 (s, 2H), 2.79 (s, 2H), 2.41 (s, 3H), 1.69 (s, 3H).  $^{13}\text{C}$  NMR (100 MHz,  $\text{CDCl}_3$ ): 146.34, 143.65, 143.14, 134.97, 133.87, 129.58, 129.52, 129.31, 127.64, 127.31, 125.24, 123.44, 120.72, 118.06, 50.87, 31.60, 21.47, 20.24. IR ( $\text{cm}^{-1}$ ): 3068, 2921, 2853, 1678, 1594, 1516, 1493, 1449, 1401, 1343, 1305, 1267, 1212, 1163, 1108, 1091, 1055, 1033, 1011, 974, 959, 912, 877, 854, 814, 780, 747, 736, 703, 665, 635, 614. HRMS (ESI)  $m/z$  calcd for  $\text{C}_{20}\text{H}_{20}\text{N}_2\text{O}_4\text{SNa}^+$  ( $\text{M}+\text{Na}$ ) $^+$  407.10360, found 407.10373.

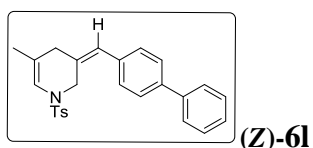

(Z)-3-([1,1'-biphenyl]-4-ylmethylene)-5-methyl-1-tosyl-1,2,3,4-tetrahydropyridine,



M.P.= 149-151 °C, 31.3%, white solid, 26 mg.

<sup>1</sup>H NMR (400 MHz, CDCl<sub>3</sub>): 7.73 (d, *J* = 8.2 Hz, 2H), 7.62 (d, *J* = 7.2 Hz, 2H), 7.57 (d, *J* = 8.2 Hz, 2H), 7.47 (t, *J* = 7.6 Hz, 2H), 7.37 (t, *J* = 7.3 Hz, 1H), 7.30 (d, *J* = 9.4 Hz, 2H), 7.18 (d, *J* = 8.2 Hz, 2H), 6.33 (s, 1H), 6.27 (s, 1H), 3.96 (s, 2H), 3.81 (s, 2H), 2.43 (s, 3H), 1.78 (s, 3H). <sup>13</sup>C NMR (100 MHz, CDCl<sub>3</sub>): 143.52, 140.60, 139.57, 135.31, 135.30, 134.17, 129.51, 129.43, 128.78, 127.71, 127.32, 126.91, 126.79, 124.18, 120.11, 49.72, 49.48, 21.49, 20.83. IR (cm<sup>-1</sup>): 3027, 2962, 2922, 1646, 1596, 1486, 1448, 1376, 1344, 1304, 1263, 1226, 1161, 1092, 960, 853, 814, 763, 735, 698, 672, 654, 603. HRMS (ESI) *m/z* calcd for C<sub>26</sub>H<sub>25</sub>NO<sub>2</sub>SNa<sup>+</sup> (M+Na)<sup>+</sup> 438.14982, found 438.14996.

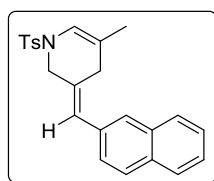

**(E)-6m**

(E)-5-methyl-3-(naphthalen-2-ylmethylene)-1-tosyl-1,2,3,4-tetrahydropyridine, oil, 36.7%, 32 mg.

<sup>1</sup>H NMR (400 MHz, CDCl<sub>3</sub>): 7.86 (d, *J* = 8.1 Hz, 1H), 7.78 (d, *J* = 8.2 Hz, 3H), 7.57 (d, *J* = 8.3 Hz, 1H), 7.51 (t, *J* = 8.0 Hz, 1H), 7.44 (q, *J* = 8.2 Hz, 2H), 7.36 (d, *J* = 8.1 Hz, 2H), 7.09 (d, *J* = 7.0 Hz, 1H), 6.75 (s, 1H), 6.53 (s, 1H), 4.20 (d, *J* = 1.1 Hz, 2H), 2.65 (s, 2H), 2.44 (s, 3H), 1.60 (s, 3H). <sup>13</sup>C NMR (100 MHz, CDCl<sub>3</sub>): 143.46, 135.47, 133.57, 133.40, 131.82, 131.46, 129.70, 128.34, 127.63, 127.27, 126.28, 125.86, 125.84, 125.11, 124.89, 124.68, 120.02, 118.11, 50.77, 31.54, 21.59, 20.29. IR (cm<sup>-1</sup>): 3058, 2964, 2916, 2854, 1733, 1676, 1596, 1507, 1493, 1448, 1347, 1265, 1215, 1163, 1091, 1058, 972, 913, 803, 782, 735, 704, 671, 659, 601. HRMS (ESI) *m/z* calcd for C<sub>24</sub>H<sub>23</sub>NO<sub>2</sub>SNa<sup>+</sup> (M+Na)<sup>+</sup> 412.13417, found 412.13425.

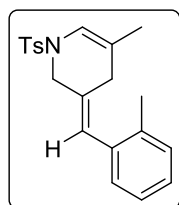

**(E)-6n**

(E)-5-methyl-3-(2-methylbenzylidene)-1-tosyl-1,2,3,4-tetrahydropyridine, oil, 43.2%, 30.5 mg.

<sup>1</sup>H NMR (400 MHz, CDCl<sub>3</sub>): 7.73 (d, *J* = 8.3 Hz, 2H), 7.32 (d, *J* = 8.1 Hz, 2H), 7.18 – 7.11 (m, 3H), 6.91 (d, *J* = 6.9 Hz, 1H), 6.51 (s, 1H), 6.32 (s, 1H), 4.07 (s, 2H), 2.66 (s, 2H), 2.43 (s, 3H), 2.07 (s, 3H), 1.65 (s, 3H). <sup>13</sup>C NMR (100 MHz, CDCl<sub>3</sub>): 143.40, 136.37, 135.54, 135.35, 130.08, 129.79, 129.63, 128.69, 127.19, 127.16, 125.90, 125.34, 119.93, 117.73, 50.70, 31.20, 21.44, 20.31, 19.56. IR (cm<sup>-1</sup>): 3061, 2968, 2921, 2856, 1919, 1734, 1678, 1597, 1493, 1452, 1347, 1215, 1164, 1091, 1055, 1009, 973, 914, 814, 746, 704, 670, 601. HRMS (ESI) *m/z* calcd for C<sub>21</sub>H<sub>23</sub>NO<sub>2</sub>SNa<sup>+</sup> (M+Na)<sup>+</sup> 376.13417, found 376.13431.

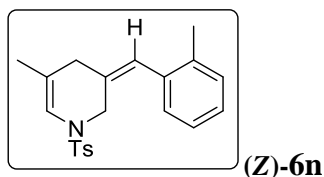

(Z)-5-methyl-3-(2-methylbenzylidene)-1-tosyl-1,2,3,4-tetrahydropyridine, M.P.= 132-134 °C, 10.8%, white solid, 7.6 mg.

<sup>1</sup>H NMR (400 MHz, CDCl<sub>3</sub>): 7.73 (d, *J* = 8.3 Hz, 2H), 7.31 (d, *J* = 8.1 Hz, 2H), 7.20 – 7.10 (m, 3H), 6.89 (d, *J* = 7.0 Hz, 1H), 6.25 (s, 1H), 6.07 (s, 1H), 3.97 (s, 2H), 3.77 (s, 2H), 2.45 (s, 3H), 2.23 (s, 3H), 1.72 (s, 3H). <sup>13</sup>C NMR (100 MHz, CDCl<sub>3</sub>): 143.51, 136.49, 135.12, 134.60, 134.11, 129.85, 129.83, 129.56, 129.49, 127.67, 127.13, 125.21, 123.47, 120.14, 49.34, 49.32, 21.49, 20.77, 19.91. IR (cm<sup>-1</sup>): 3018, 2921, 1648, 1597, 1451, 1377, 1345, 1305, 1162, 1092, 1036, 960, 899, 852, 814, 747, 666, 606. HRMS (ESI) *m/z* calcd for C<sub>21</sub>H<sub>23</sub>NO<sub>2</sub>SNa<sup>+</sup> (M+Na)<sup>+</sup> 376.13417, found 376.13431.

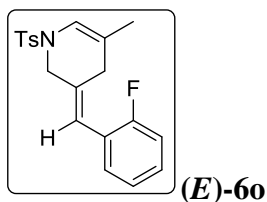

(E)-3-(2-fluorobenzylidene)-5-methyl-1-tosyl-1,2,3,4-tetrahydropyridine, oil, 30%, 21 mg.

<sup>1</sup>H NMR (400 MHz, CDCl<sub>3</sub>): 7.69 (d, *J* = 8.3 Hz, 2H), 7.30 (d, *J* = 8.4 Hz, 2H), 7.26 – 7.20 (m, 1H), 7.10 – 6.99 (m, 3H), 6.49 (s, 1H), 6.24 (s, 1H), 4.05 (s, 2H), 2.69 (s, 2H), 2.41 (s, 3H), 1.67 (s, 3H). <sup>13</sup>C NMR (100 MHz, CDCl<sub>3</sub>): 161.08 (d, *J* = 247.0 Hz), 158.61, 143.50, 135.03, 132.18, 130.24 (d, *J* = 4.0 Hz), 130.20, 129.58, 128.91 (d, *J* = 8.0 Hz), 128.83, 127.21, 124.16 (d, *J* = 15.0 Hz), 124.01, 123.57 (d, *J* = 3.0 Hz), 123.54, 120.32, 119.85 (d, *J* = 3.0 Hz), 119.82, 118.41, 115.54 (d, *J* = 22.0 Hz), 115.32, 50.85, 31.59 (d, *J* = 2.0 Hz), 31.57, 21.45, 20.30. <sup>19</sup>F NMR (376 MHz, CDCl<sub>3</sub>): -114.12 (s). IR (cm<sup>-1</sup>): 3063, 2971, 2923, 1922, 1680, 1610, 1597, 1485, 1453, 1345, 1306, 1231, 1163, 1121, 1092, 1033, 1009, 952, 814, 758, 736, 704, 670, 635. HRMS (ESI) *m/z* calcd for C<sub>20</sub>H<sub>20</sub>FNO<sub>2</sub>SNa<sup>+</sup> (M+Na)<sup>+</sup> 380.10910, found 380.10919.

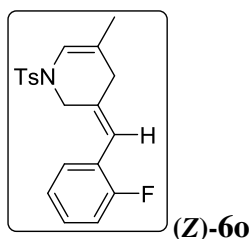

(Z)-3-(2-fluorobenzylidene)-5-methyl-1-tosyl-1,2,3,4-tetrahydropyridine, M.P.= 116-118 °C, 20%, white solid, 14 mg.

<sup>1</sup>H NMR (400 MHz, CDCl<sub>3</sub>): 7.71 (d, *J* = 8.2 Hz, 2H), 7.29 (d, *J* = 7.9 Hz, 2H), 7.26 – 7.21 (m, 1H), 7.06 (dq, *J* = 15.4, 7.5 Hz, 3H), 6.24 (s, 1H), 6.14 (s, 1H), 3.96 (s, 2H), 3.78 (s, 2H), 2.42 (s, 3H), 1.75 (s, 3H). <sup>13</sup>C NMR (100 MHz, CDCl<sub>3</sub>): 161.37 (d, *J* = 247.0 Hz), 158.90, 143.56, 135.87, 134.02, 131.09, 131.06, 129.54, 128.71 (d, *J* = 8.0

Hz), 128.63, 127.69, 124.00 (d,  $J = 15.0$  Hz), 123.85, 123.48 (d,  $J = 3.0$  Hz), 123.45, 119.84, 117.11 (d,  $J = 3.0$  Hz), 117.08, 115.47 (d,  $J = 22.0$  Hz), 115.25, 49.46 (d,  $J = 12.0$  Hz), 49.34, 21.48, 20.84.  $^{19}\text{F}$  NMR (376 MHz,  $\text{CDCl}_3$ ): -114.88 (s). IR ( $\text{cm}^{-1}$ ): 3061, 2923, 1919, 1647, 1597, 1574, 1484, 1451, 1378, 1346, 1305, 1233, 1162, 1092, 1034, 960, 898, 854, 814, 758, 671, 603. HRMS (ESI)  $m/z$  calcd for  $\text{C}_{20}\text{H}_{20}\text{FNO}_2\text{SNa}^+$  ( $\text{M}+\text{Na}$ ) $^+$  380.10910, found 380.10919.

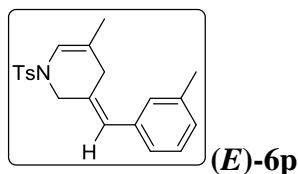

(E)-5-methyl-3-(3-methylbenzylidene)-1-tosyl-1,2,3,4-tetrahydropyridine, oil, 36%, 25 mg.

$^1\text{H}$  NMR (400 MHz,  $\text{CDCl}_3$ ): 7.70 (d,  $J = 8.3$  Hz, 2H), 7.33 – 7.28 (m, 2H), 7.21 (t,  $J = 7.6$  Hz, 1H), 7.05 (d,  $J = 7.6$  Hz, 1H), 6.90 – 6.77 (m, 2H), 6.49 (s, 1H), 6.17 (s, 1H), 4.00 (s, 2H), 2.80 (s, 2H), 2.42 (s, 3H), 2.35 (s, 3H), 1.69 (s, 3H).  $^{13}\text{C}$  NMR (100 MHz,  $\text{CDCl}_3$ ): 143.39, 137.67, 136.53, 135.28, 129.52, 129.50, 129.38, 127.99, 127.65, 127.34, 127.22, 125.68, 120.47, 118.91, 51.08, 31.52, 21.47, 21.40, 20.35. IR ( $\text{cm}^{-1}$ ): 3049, 2965, 2921, 2858, 1673, 1598, 1493, 1448, 1346, 1304, 1211, 1162, 1091, 1053, 1033, 1009, 975, 915, 814, 738, 703, 671. HRMS (ESI)  $m/z$  calcd for  $\text{C}_{21}\text{H}_{23}\text{NO}_2\text{SNa}^+$  ( $\text{M}+\text{Na}$ ) $^+$  376.13417, found 376.13425.

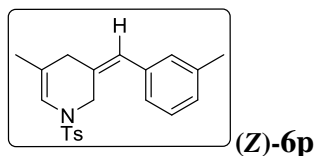

(Z)-5-methyl-3-(3-methylbenzylidene)-1-tosyl-1,2,3,4-tetrahydropyridine, oil, 18%, 13 mg.

$^1\text{H}$  NMR (400 MHz,  $\text{CDCl}_3$ ): 7.71 (d,  $J = 8.2$  Hz, 2H), 7.29 (d,  $J = 8.1$  Hz, 2H), 7.22 (t,  $J = 7.5$  Hz, 1H), 7.06 (d,  $J = 7.6$  Hz, 1H), 6.89 (d,  $J = 9.2$  Hz, 2H), 6.23 (d,  $J = 12.7$  Hz, 2H), 3.93 (s, 2H), 3.79 (s, 2H), 2.43 (s, 3H), 2.36 (s, 3H), 1.75 (s, 3H).  $^{13}\text{C}$  NMR (100 MHz,  $\text{CDCl}_3$ ): 143.43, 137.66, 136.20, 134.87, 134.22, 129.63, 129.47, 129.15, 127.98, 127.68, 127.58, 126.07, 124.69, 120.11, 49.67, 49.44, 21.47, 21.39, 20.78. IR ( $\text{cm}^{-1}$ ): 3029, 2920, 2733, 1647, 1598, 1580, 1492, 1450, 1345, 1305, 1161, 1092, 1037, 1017, 962, 896, 812, 736, 702, 672, 655, 606. HRMS (ESI)  $m/z$  calcd for  $\text{C}_{21}\text{H}_{23}\text{NO}_2\text{SNa}^+$  ( $\text{M}+\text{Na}$ ) $^+$  376.13417, found 376.13425.

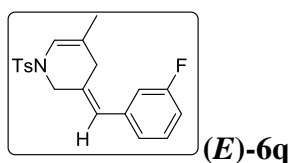

(E)-3-(3-fluorobenzylidene)-5-methyl-1-tosyl-1,2,3,4-tetrahydropyridine, oil, 37.3%, 26.5 mg.

$^1\text{H}$  NMR (400 MHz,  $\text{CDCl}_3$ ): 7.69 (d,  $J = 8.3$  Hz, 2H), 7.27 (dd,  $J = 19.2, 8.0$  Hz, 3H), 6.92 (t,  $J = 8.4$  Hz, 1H), 6.80 (d,  $J = 7.7$  Hz, 1H), 6.68 (d,  $J = 10.0$  Hz, 1H), 6.50 (s, 1H), 6.15 (s, 1H), 3.99 (s, 2H), 2.77 (s, 2H), 2.41 (s, 3H), 1.69 (s, 3H).  $^{13}\text{C}$  NMR (100

MHz, CDCl<sub>3</sub>): 163.69 (d, *J* = 245.0 Hz), 161.24, 143.58, 138.72 (d, *J* = 8.0 Hz), 138.64, 135.14, 130.99, 129.63, 129.55, 127.33, 126.00 (d, *J* = 2.0 Hz), 125.98, 124.39 (d, *J* = 2.0 Hz), 124.37, 120.63, 118.83, 115.43 (d, *J* = 21.0 Hz), 115.22, 113.88 (d, *J* = 21.0 Hz), 113.67, 50.93, 31.47, 21.42, 20.31. <sup>19</sup>F NMR (376 MHz, CDCl<sub>3</sub>): -113.28 (s). IR (cm<sup>-1</sup>): 3066, 2966, 2919, 2855, 1919, 1677, 1611, 1581, 1485, 1442, 1347, 1305, 1252, 1163, 1091, 1055, 973, 914, 813, 789, 694, 671. HRMS (ESI) *m/z* calcd for C<sub>20</sub>H<sub>20</sub>FNO<sub>2</sub>SNa<sup>+</sup> (M+Na)<sup>+</sup> 380.10910, found 380.10919.

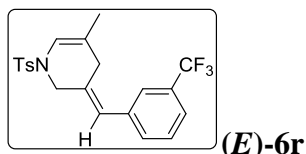

(E)-5-methyl-1-tosyl-3-(3-(trifluoromethyl)benzylidene)-1,2,3,4-tetrahydropyridine, oil, 34.6%, 28 mg.

<sup>1</sup>H NMR (400 MHz, CDCl<sub>3</sub>): 7.69 (d, *J* = 8.3 Hz, 2H), 7.50 – 7.40 (m, 2H), 7.32 – 7.28 (m, 2H), 7.21 (d, *J* = 12.6 Hz, 2H), 6.50 (s, 1H), 6.19 (s, 1H), 4.02 (s, 2H), 2.75 (s, 2H), 2.40 (s, 3H), 1.70 (s, 3H). <sup>13</sup>C NMR (100 MHz, CDCl<sub>3</sub>): 143.66, 137.21, 135.17, 131.73, 131.64, 131.04 (q, *J* = 32.0 Hz), 130.72, 130.40, 130.08, 129.54, 128.62, 128.02 (q, *J* = 270.0 Hz), 127.38, 125.72, 125.32 (q, *J* = 4.0 Hz), 125.28, 125.24, 125.21, 123.65 (q, *J* = 4.0 Hz), 123.61, 123.57, 123.53, 122.61, 120.74, 119.90, 118.84, 50.90, 31.38, 21.35, 20.30. <sup>19</sup>F NMR (376 MHz, CDCl<sub>3</sub>): -62.70 (s). IR (cm<sup>-1</sup>): 3066, 2965, 2920, 2856, 1675, 1597, 1493, 1437, 1330, 1305, 1222, 1164, 1125, 1092, 1073, 975, 912, 813, 704, 664, 600. HRMS (ESI) *m/z* calcd for C<sub>21</sub>H<sub>20</sub>F<sub>3</sub>NO<sub>2</sub>SNa<sup>+</sup> (M+Na)<sup>+</sup> 430.10591, found 430.10599.

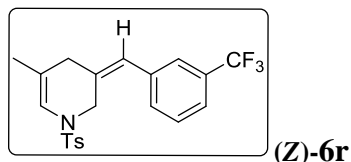

(Z)-5-methyl-1-tosyl-3-(3-(trifluoromethyl)benzylidene)-1,2,3,4-tetrahydropyridine, oil, 12.4%, 10 mg.

<sup>1</sup>H NMR (400 MHz, CDCl<sub>3</sub>): 7.71 (d, *J* = 8.3 Hz, 2H), 7.51 – 7.41 (m, 2H), 7.30 – 7.24 (m, 4H), 6.23 (s, 1H), 6.14 (s, 1H), 3.97 (s, 2H), 3.83 (s, 2H), 2.41 (s, 3H), 1.76 (s, 3H). <sup>13</sup>C NMR (100 MHz, CDCl<sub>3</sub>): 143.70, 136.96, 136.71, 134.35, 132.14, 131.01 (q, *J* = 32.0 Hz), 130.89, 130.69, 130.37, 130.05, 129.50, 128.60, 128.09 (q, *J* = 271.0 Hz), 127.67, 125.57 (q, *J* = 4.0 Hz), 125.53, 125.49, 125.46, 125.39, 123.49 (q, *J* = 4.0 Hz), 123.46, 123.42, 123.38, 122.84, 122.68, 119.97, 119.34, 49.51, 49.48, 21.39, 20.83. <sup>19</sup>F NMR (376 MHz, CDCl<sub>3</sub>): -62.70 (s). IR (cm<sup>-1</sup>): 3062, 2924, 2851, 1647, 1597, 1493, 1438, 1330, 1216, 1161, 1124, 1092, 1073, 1017, 962, 907, 813, 766, 704, 664, 605. HRMS (ESI) *m/z* calcd for C<sub>21</sub>H<sub>20</sub>F<sub>3</sub>NO<sub>2</sub>SNa<sup>+</sup> (M+Na)<sup>+</sup> 430.10591, found 430.10599.

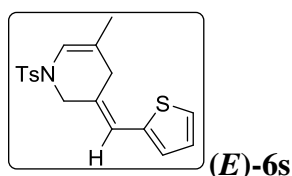

(E)-5-methyl-3-(thiophen-2-ylmethylene)-1-tosyl-1,2,3,4-tetrahydropyridine, M.P.= 118-120 °C, 29.4%, yellow solid, 20 mg.

<sup>1</sup>H NMR (400 MHz, CDCl<sub>3</sub>): 7.66 (d, *J* = 8.3 Hz, 2H), 7.26 (t, *J* = 8.3 Hz, 3H), 7.02 – 6.98 (m, 1H), 6.88 (d, *J* = 3.4 Hz, 1H), 6.50 (s, 1H), 6.33 (s, 1H), 3.97 (s, 2H), 2.86 (s, 2H), 2.35 (s, 3H), 1.76 (s, 3H). <sup>13</sup>C NMR (100 MHz, CDCl<sub>3</sub>): 143.61, 139.36, 134.89, 129.52, 128.27, 127.44, 127.26, 126.88, 125.46, 120.77, 119.88, 118.97, 50.90, 31.83, 21.45, 20.40. IR (cm<sup>-1</sup>): 3066, 2963, 2919, 2852, 1676, 1596, 1493, 1446, 1347, 1305, 1218, 1163, 1091, 1056, 970, 913, 813, 705, 672. HRMS (ESI) *m/z* calcd for C<sub>18</sub>H<sub>19</sub>NO<sub>2</sub>S<sub>2</sub>Na<sup>+</sup> (*M*+Na)<sup>+</sup> 368.07494, found 368.07504.

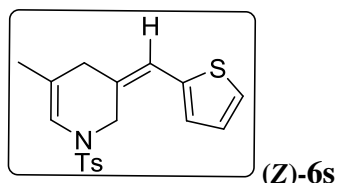

(Z)-5-methyl-3-(thiophen-2-ylmethylene)-1-tosyl-1,2,3,4-tetrahydropyridine, M.P.= 173-175 °C, 21.8%, yellow solid, 15 mg. <sup>1</sup>H NMR (400 MHz, CDCl<sub>3</sub>): 7.68 (d, *J* = 8.2 Hz, 2H), 7.27 (t, *J* = 7.2 Hz, 3H), 7.04 – 6.98 (m, 1H), 6.90 (d, *J* = 3.5 Hz, 1H), 6.55 (s, 1H), 6.29 (s, 1H), 3.90 (s, 2H), 3.77 (s, 2H), 2.39 (s, 3H), 1.82 (s, 3H). <sup>13</sup>C NMR (100 MHz, CDCl<sub>3</sub>): 143.59, 139.10, 135.90, 133.90, 129.46, 127.82, 127.65, 126.90, 125.59, 120.20, 117.43, 49.74, 49.37, 21.46, 21.03. IR (cm<sup>-1</sup>): 3113, 3080, 3045, 2925, 2819, 1635, 1594, 1492, 1449, 1348, 1307, 1290, 1217, 1163, 1090, 1065, 1033, 954, 903, 873, 817, 808, 791, 709, 684, 657, 602. HRMS (ESI) *m/z* calcd for C<sub>18</sub>H<sub>19</sub>NO<sub>2</sub>S<sub>2</sub>Na<sup>+</sup> (*M*+Na)<sup>+</sup> 368.07494, found 368.07504.

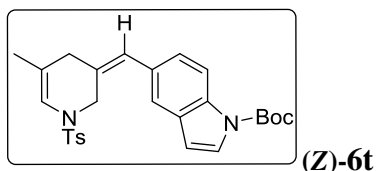

tert-butyl-(Z)-5-((5-methyl-1-tosyl-1,4-dihydropyridin-3(2H)-ylidene)methyl)-1H-indole-1-carboxylate, oil, 24.3%, 23 mg. <sup>1</sup>H NMR (400 MHz, CDCl<sub>3</sub>): 7.72 (d, *J* = 8.2 Hz, 2H), 7.61 (d, *J* = 3.6 Hz, 1H), 7.30 – 7.23 (m, 3H), 7.04 (d, *J* = 10.0 Hz, 1H), 6.55 (s, 1H), 6.34 (s, 1H), 6.28 (s, 1H), 3.96 (s, 2H), 3.81 (s, 2H), 2.42 (s, 3H), 1.75 (d, *J* = 1.4 Hz, 3H), 1.70 (s, 9H). <sup>13</sup>C NMR (101 MHz, CDCl<sub>3</sub>): 149.62, 143.43, 134.63, 134.29, 130.80, 130.45, 129.47, 128.49, 127.70, 126.36, 125.51, 125.04, 121.26, 120.24, 114.69, 107.24, 83.77, 65.81, 49.77, 49.52, 28.15, 21.48, 20.78, 15.23. IR (cm<sup>-1</sup>): 2977, 2929, 1732, 1647, 1597, 1571, 1535, 1467, 1369, 1343, 1258, 1224, 1162, 1135, 1084, 1023, 965, 946, 906, 814, 787, 766, 732, 677, 662. HRMS (ESI) *m/z* calcd for C<sub>27</sub>H<sub>30</sub>N<sub>2</sub>O<sub>4</sub>SNa<sup>+</sup> (*M*+Na)<sup>+</sup> 501.18185, found 501.18219.

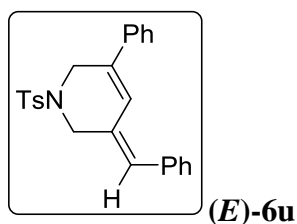

(E)-3-benzylidene-5-phenyl-1-tosyl-1,2,3,6-tetrahydropyridine, oil, 35%, 28 mg. CAS: 2387526-01-2

$^1\text{H}$  NMR (400 MHz,  $\text{CDCl}_3$ ): 7.70 (d,  $J = 8.2$  Hz, 2H), 7.35 – 7.28 (m, 7H), 7.21 (d,  $J = 8.0$  Hz, 3H), 7.07 (d,  $J = 7.3$  Hz, 2H), 6.80 (s, 1H), 6.40 (s, 1H), 4.34 (s, 2H), 4.07 (s, 2H), 2.37 (s, 3H).  $^{13}\text{C}$  NMR (100 MHz,  $\text{CDCl}_3$ ): 143.56, 137.72, 136.00, 134.49, 129.52, 129.14, 128.68, 128.36, 128.23, 127.71, 127.37, 127.15, 125.34, 120.80, 49.61, 47.38, 21.44. IR ( $\text{cm}^{-1}$ ): 3055, 2956, 2923, 1734, 1596, 1493, 1445, 1345, 1241, 1163, 1092, 1075, 1031, 953, 909, 814, 758, 699, 675, 654.

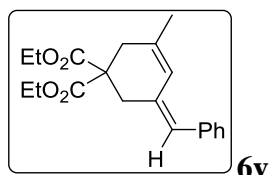

diethyl-5-benzylidene-3-methylcyclohex-3-ene-1,1-dicarboxylate (E/Z=2:1), oil, 87%, 57 mg. CAS: 145204-29-1

$^1\text{H}$  NMR (400 MHz,  $\text{CDCl}_3$ ): 7.34 (q,  $J = 7.4$  Hz, 2H), 7.25 (t,  $J = 6.4$  Hz, 3H), 6.45 (s, 1H), 5.70 (s, 1H), 4.23 (dd,  $J = 11.8, 7.1$  Hz, 4H), 2.99 (s, 1H), 2.94 (s, 2H), 2.68 (s, 1H), 1.87 (s, 1H), 1.78 (s, 2H), 1.28 (dt,  $J = 14.0, 7.1$  Hz, 6H).  $^{13}\text{C}$  NMR (100 MHz,  $\text{CDCl}_3$ ): 170.80, 170.65, 137.68, 133.57, 128.99, 128.73, 128.03, 127.97, 126.37, 126.26, 126.21, 124.93, 120.51, 118.88, 61.40, 61.34, 57.10, 38.90, 37.32, 36.40, 33.79, 23.68, 23.39, 13.99. IR ( $\text{cm}^{-1}$ ): 3053, 3022, 2978, 2934, 2907, 1733, 1645, 1598, 1574, 1492, 1445, 1388, 1365, 1244, 1181, 1094, 1051, 1020, 912, 858, 748, 699, 637.

## **IX. $^1\text{H}$ NMR, $^{13}\text{C}$ NMR and $^{19}\text{F}$ NMR spectra of compound 2, 4, 6, 7,**

### **8, 5u-d1**

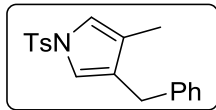

**2a**

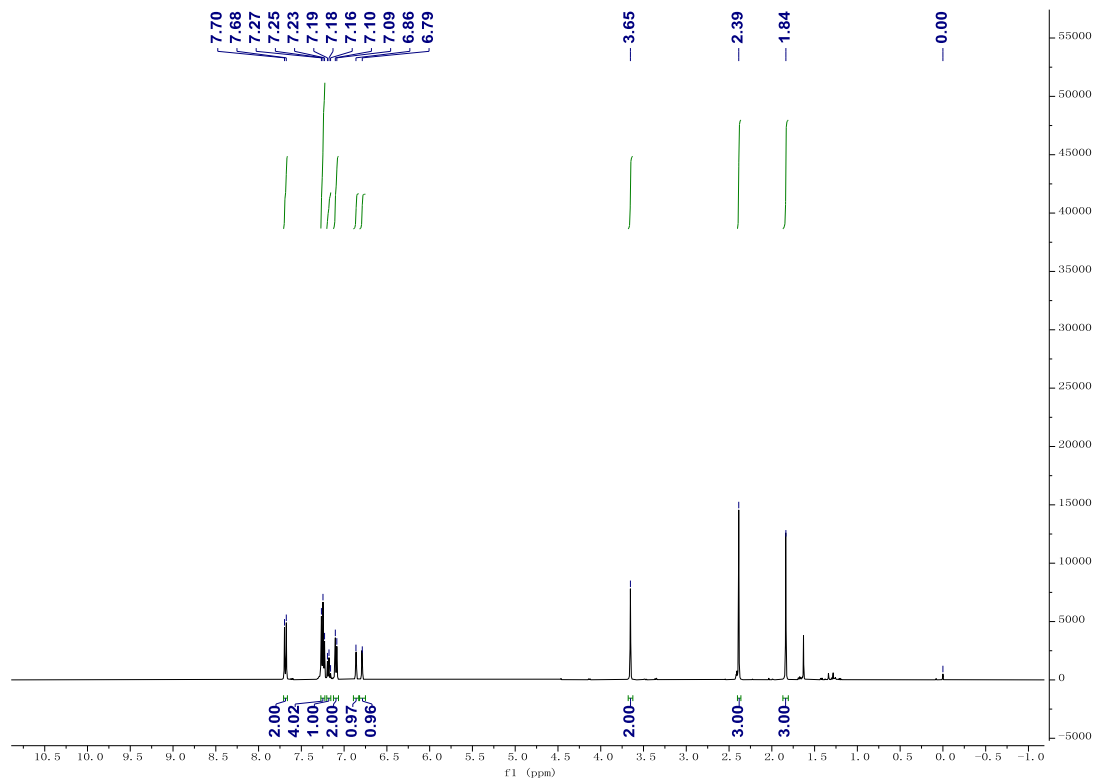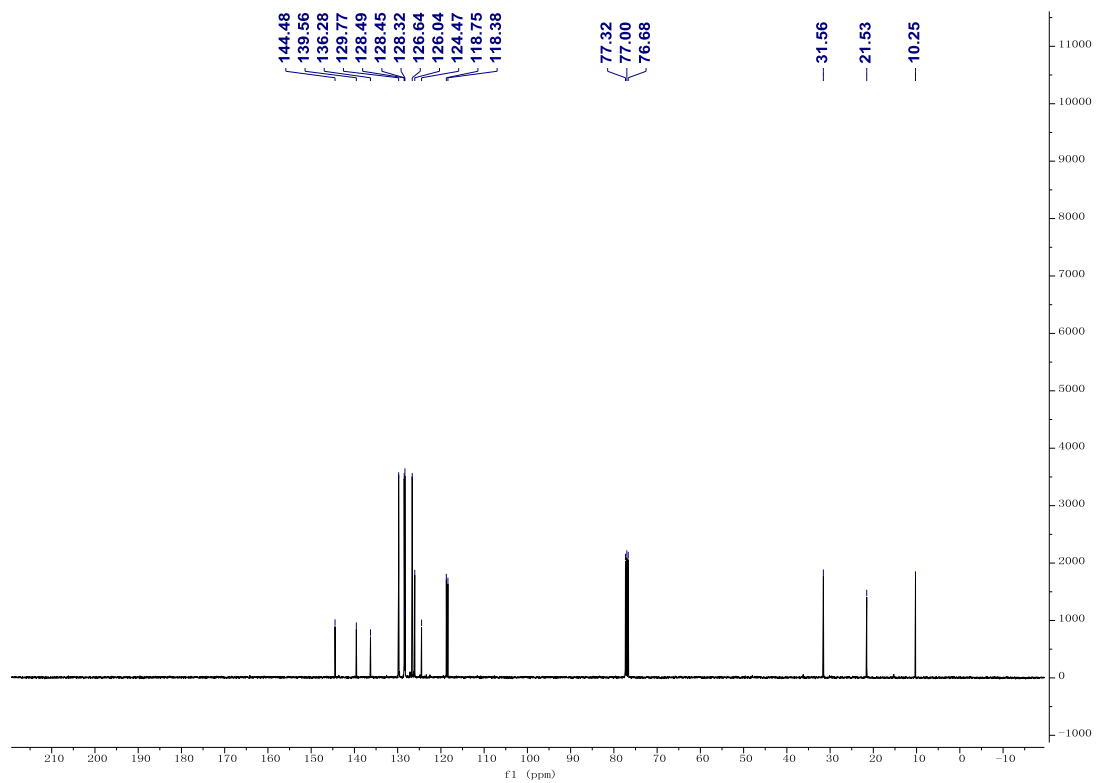

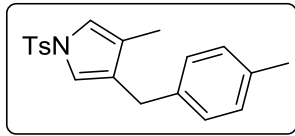

**2b**

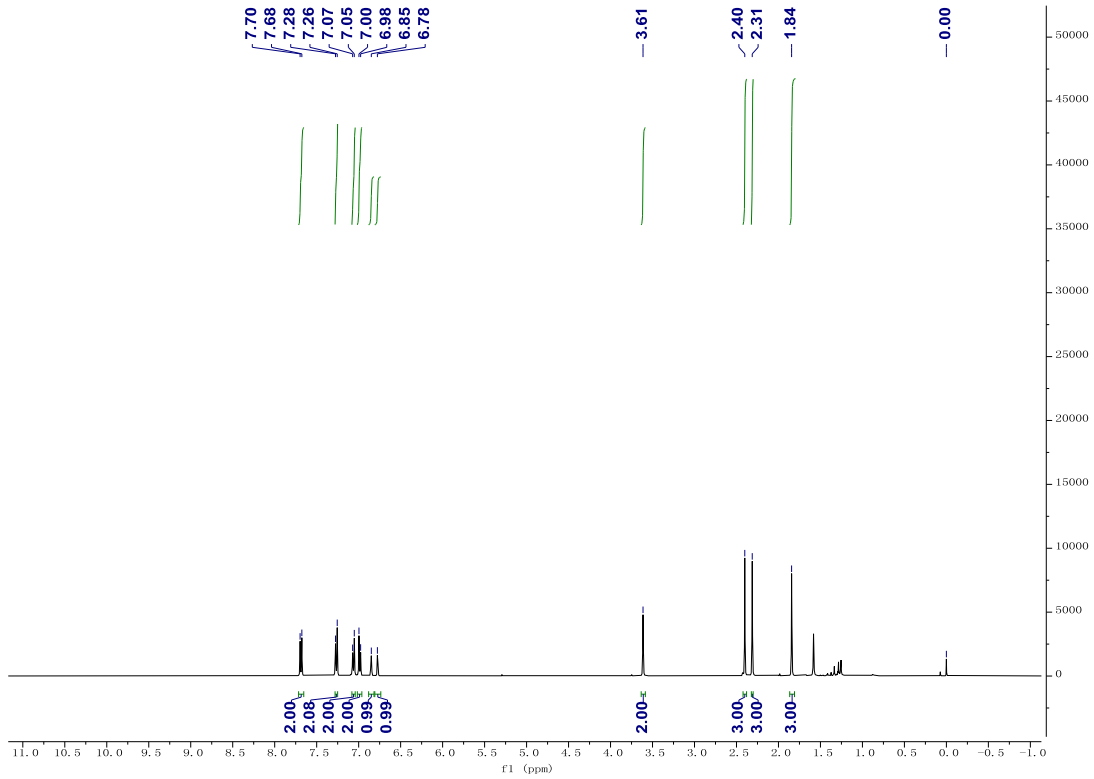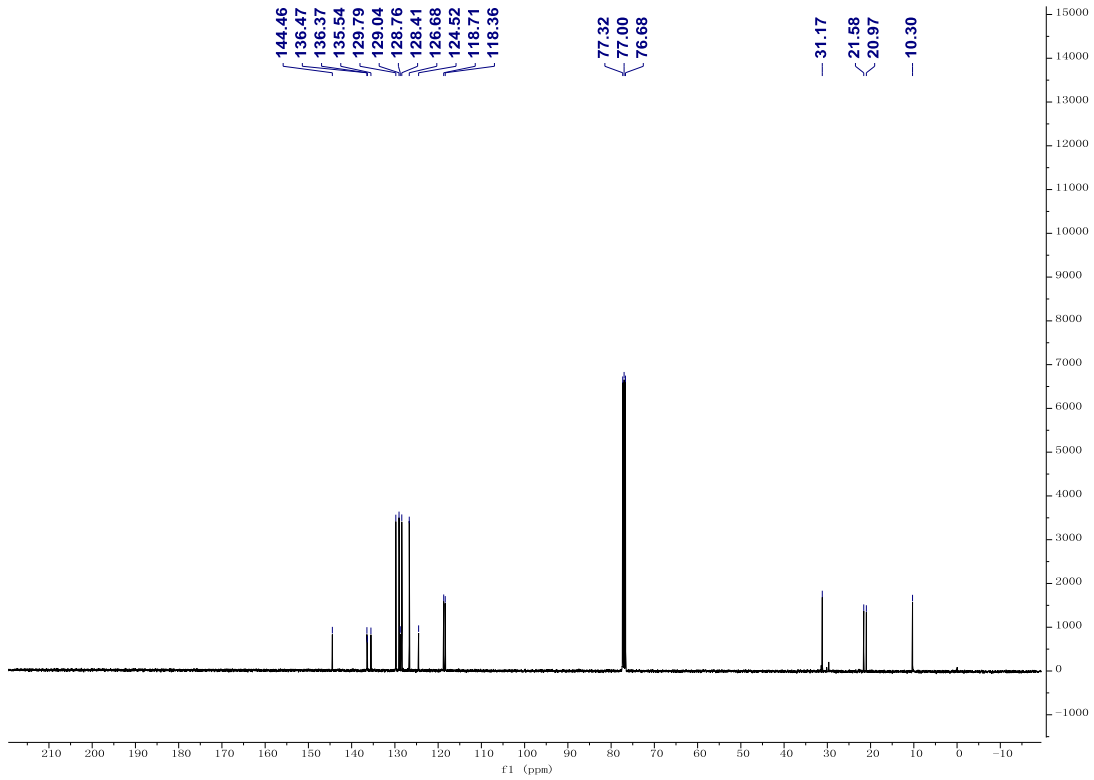



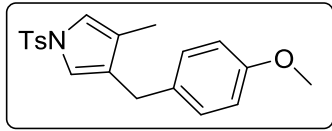

**2c**

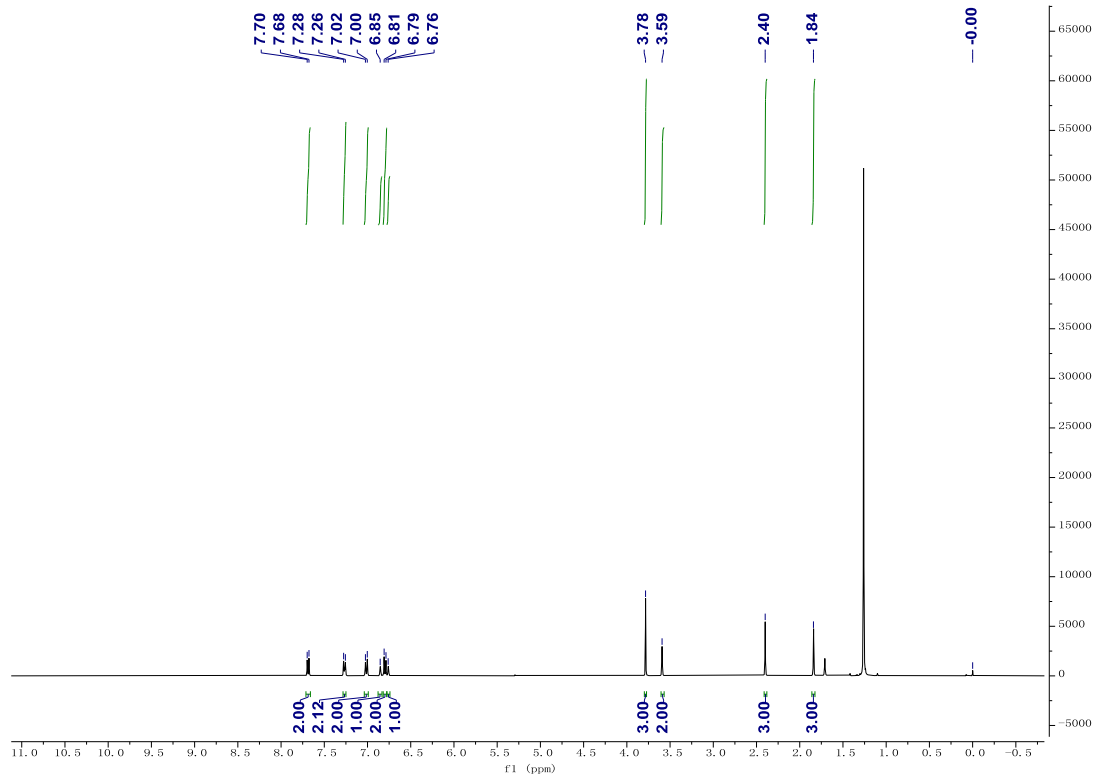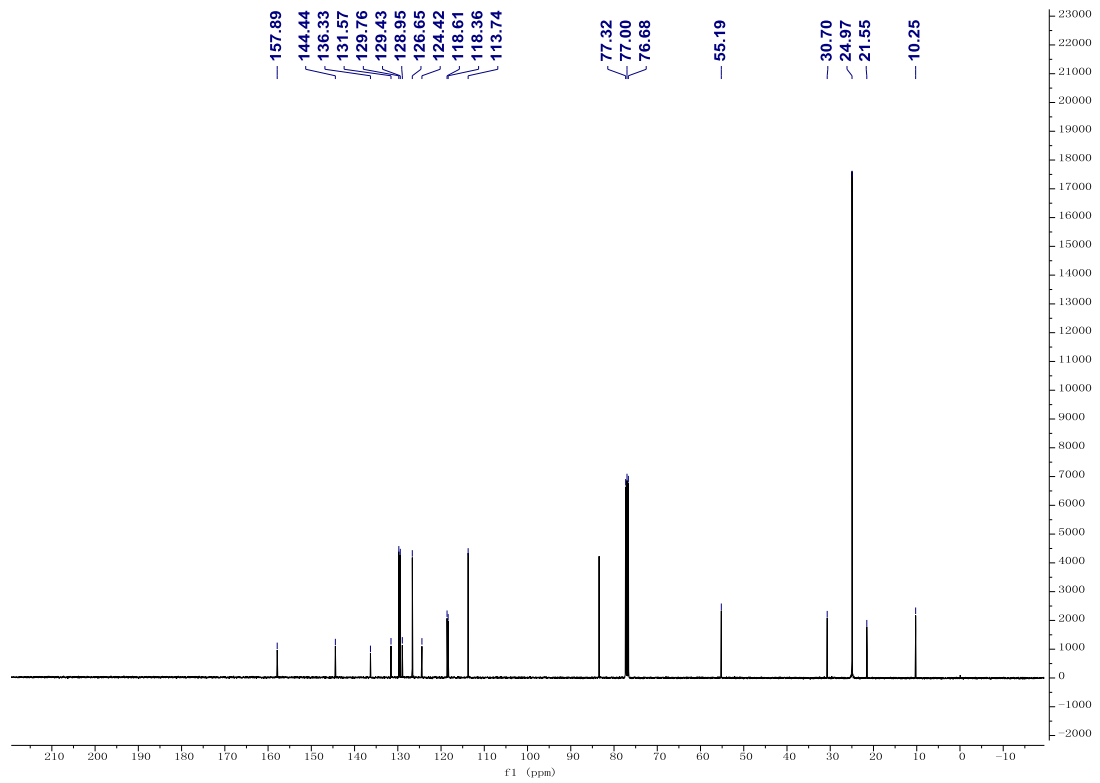

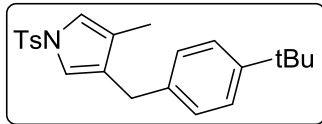

**2d**

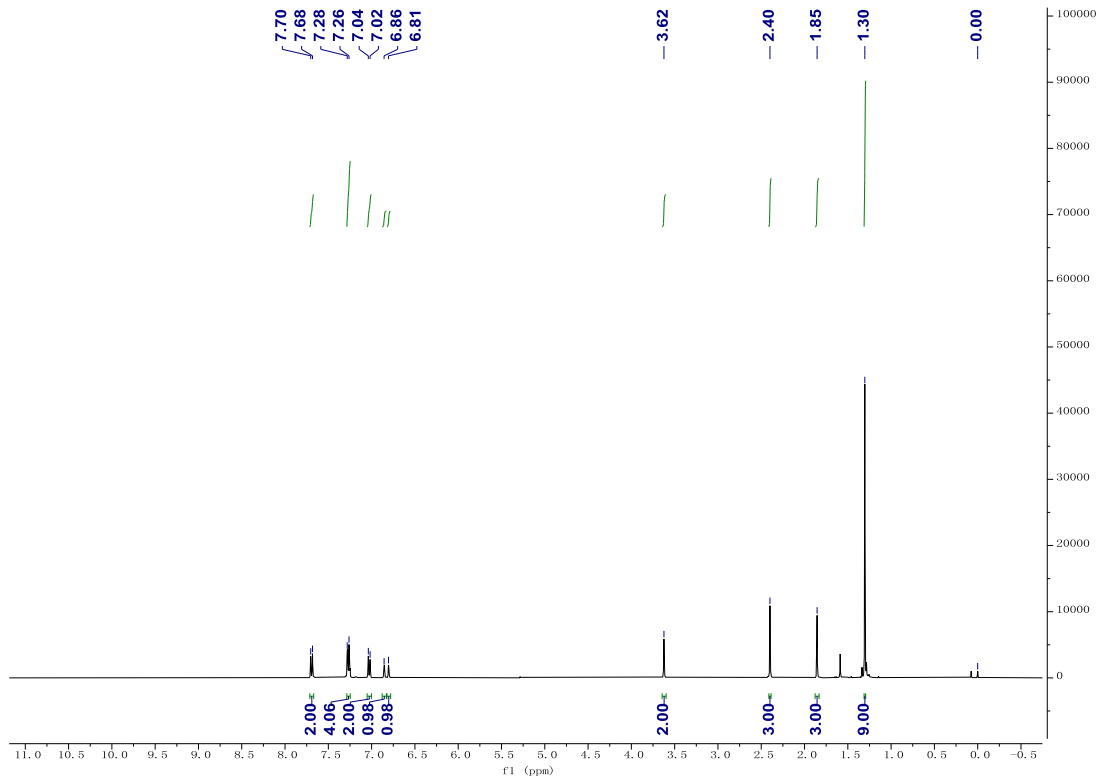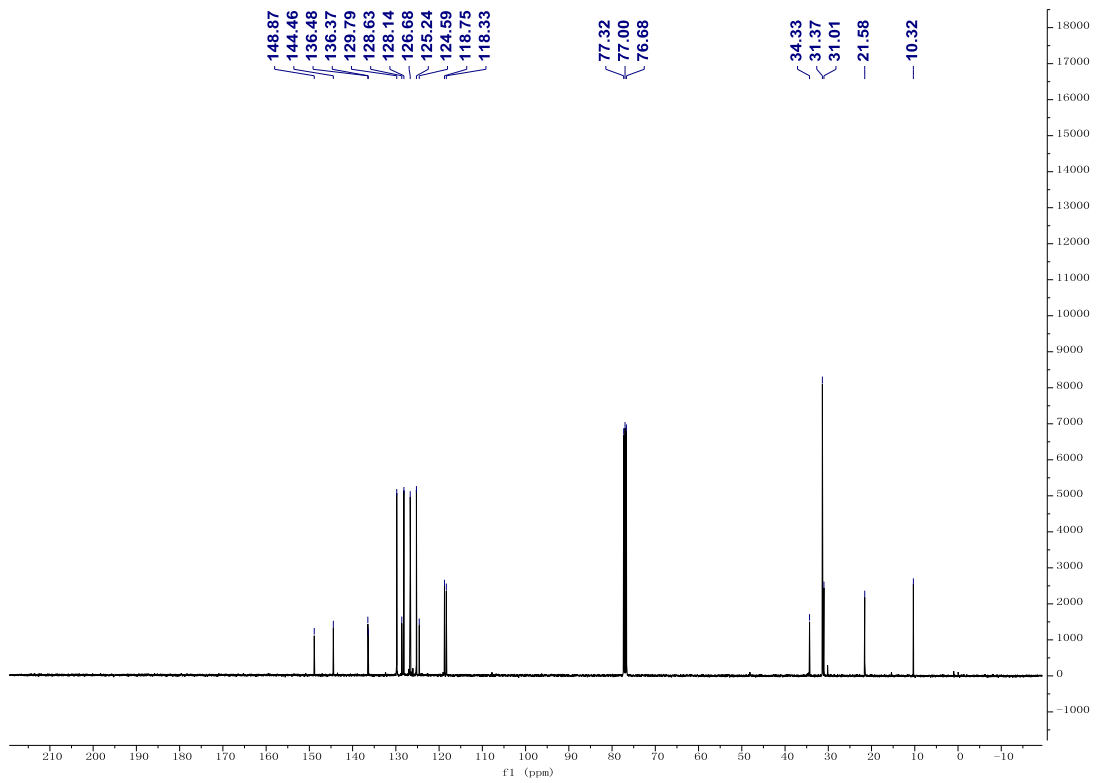

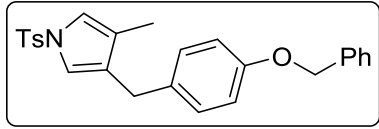

**2e**

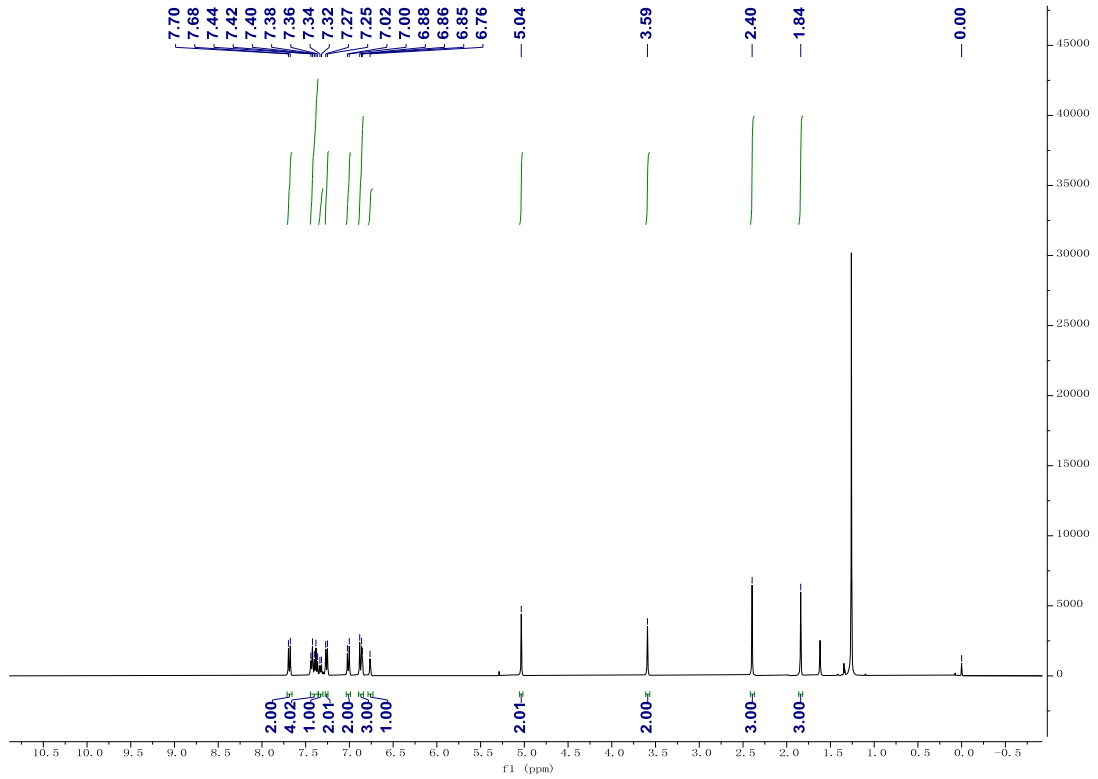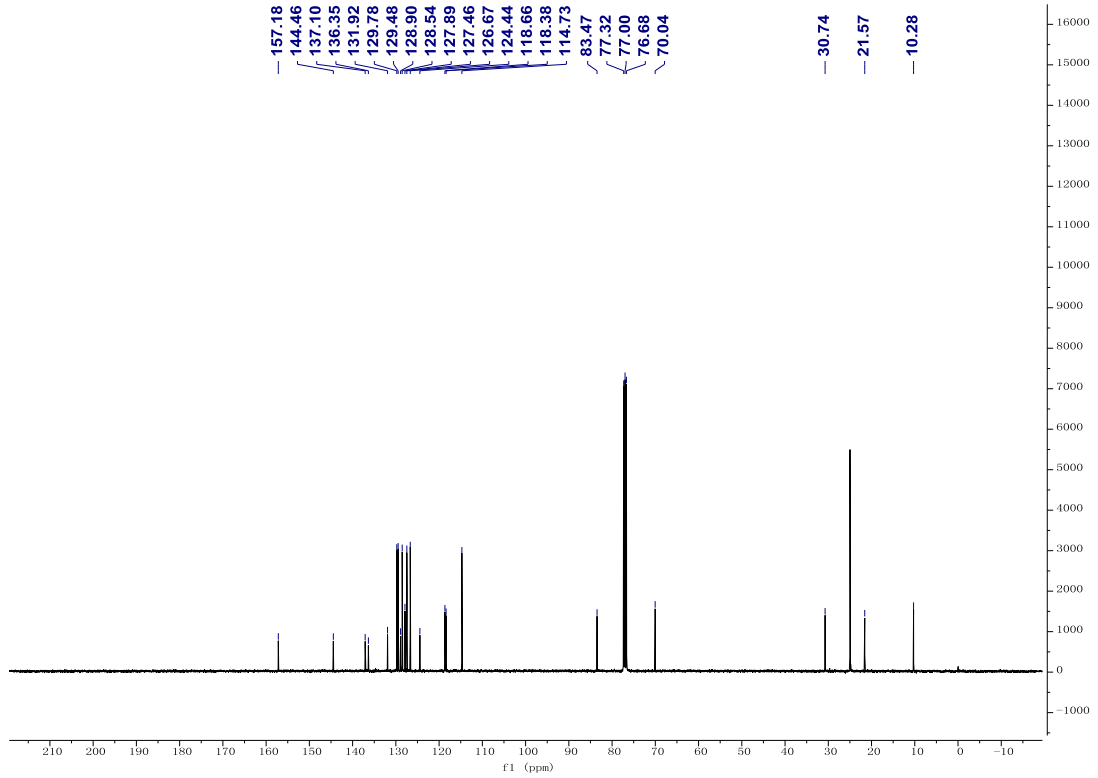

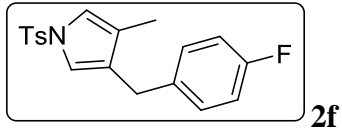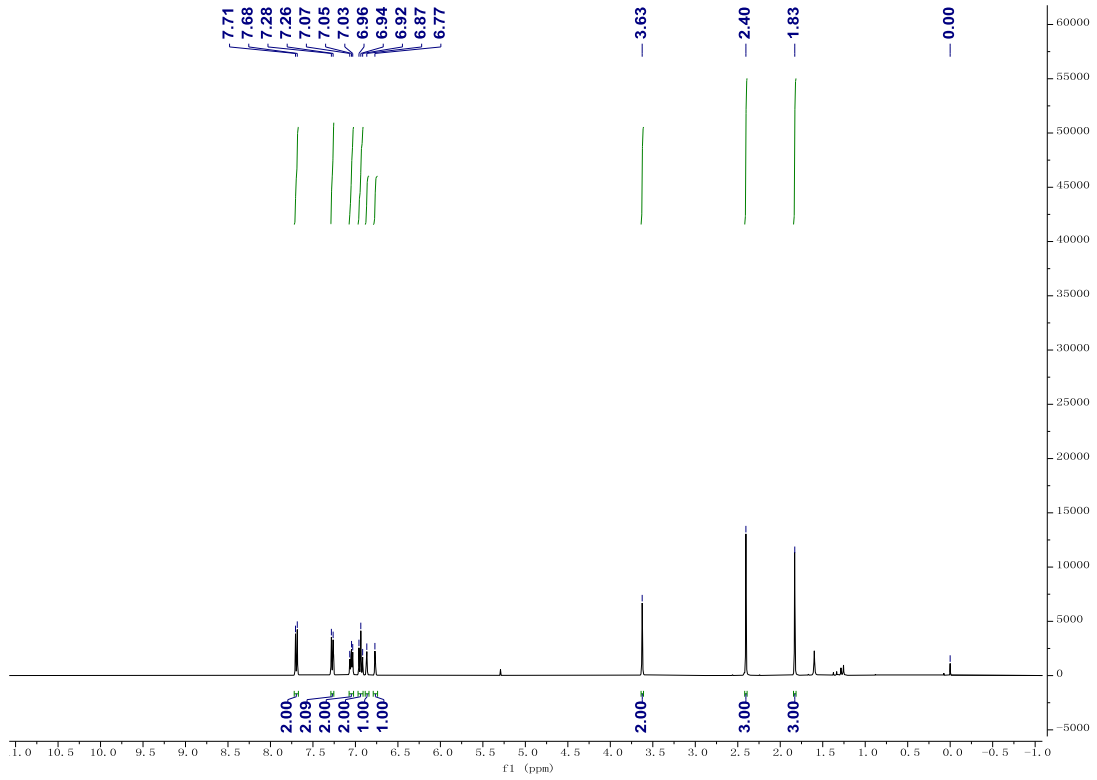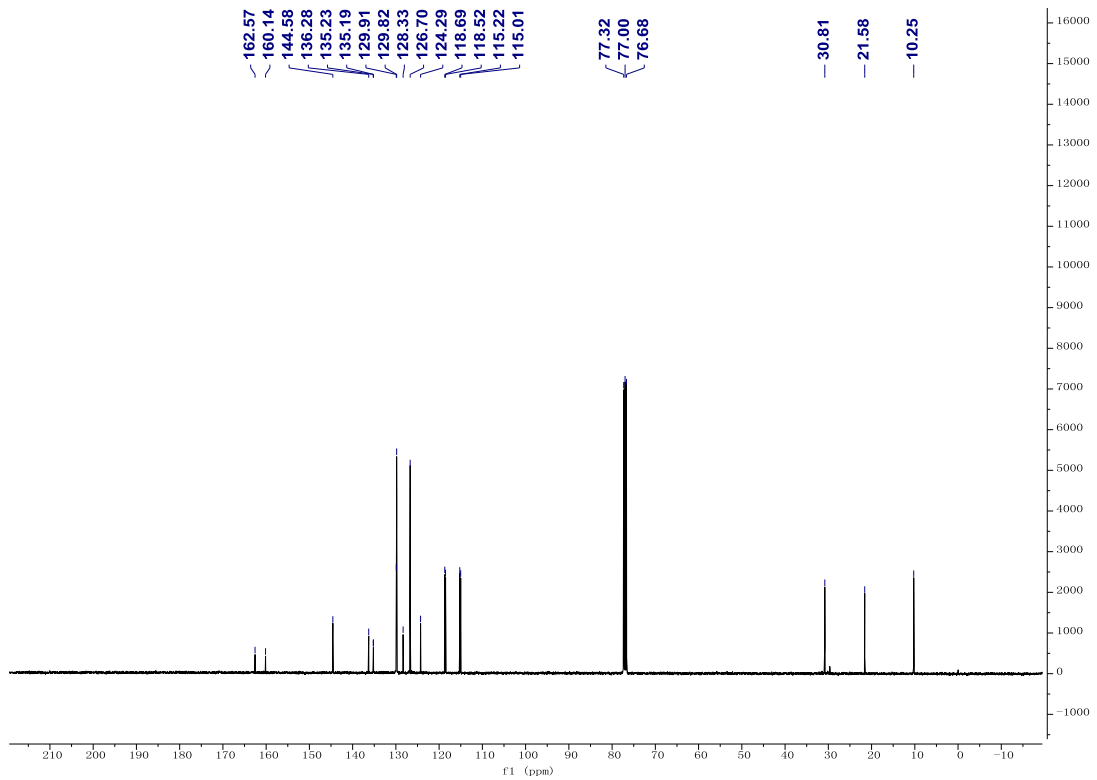

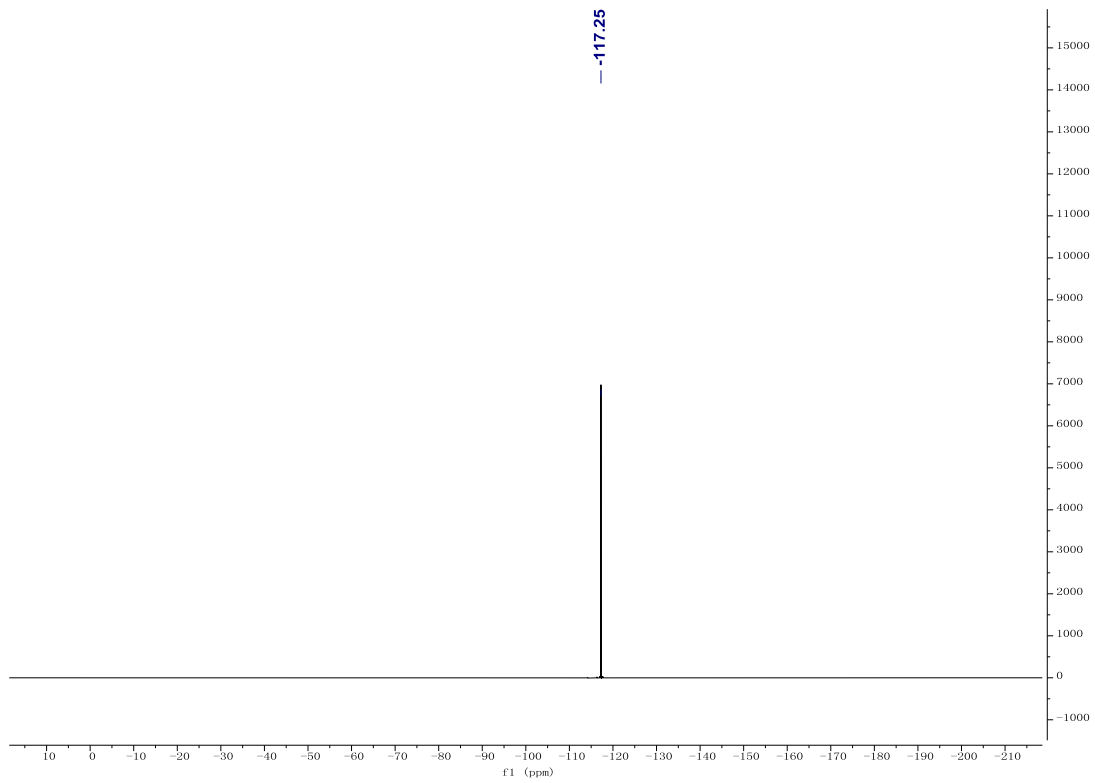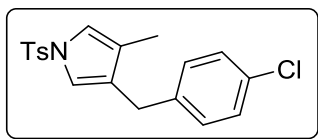

2g

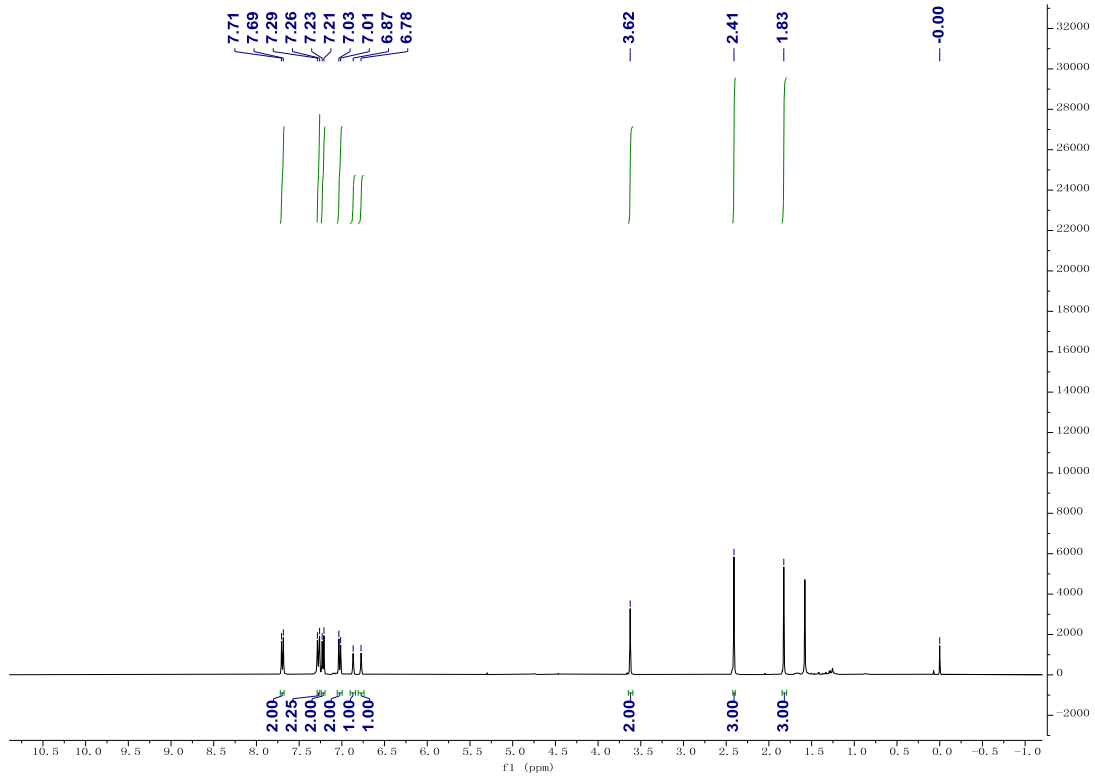

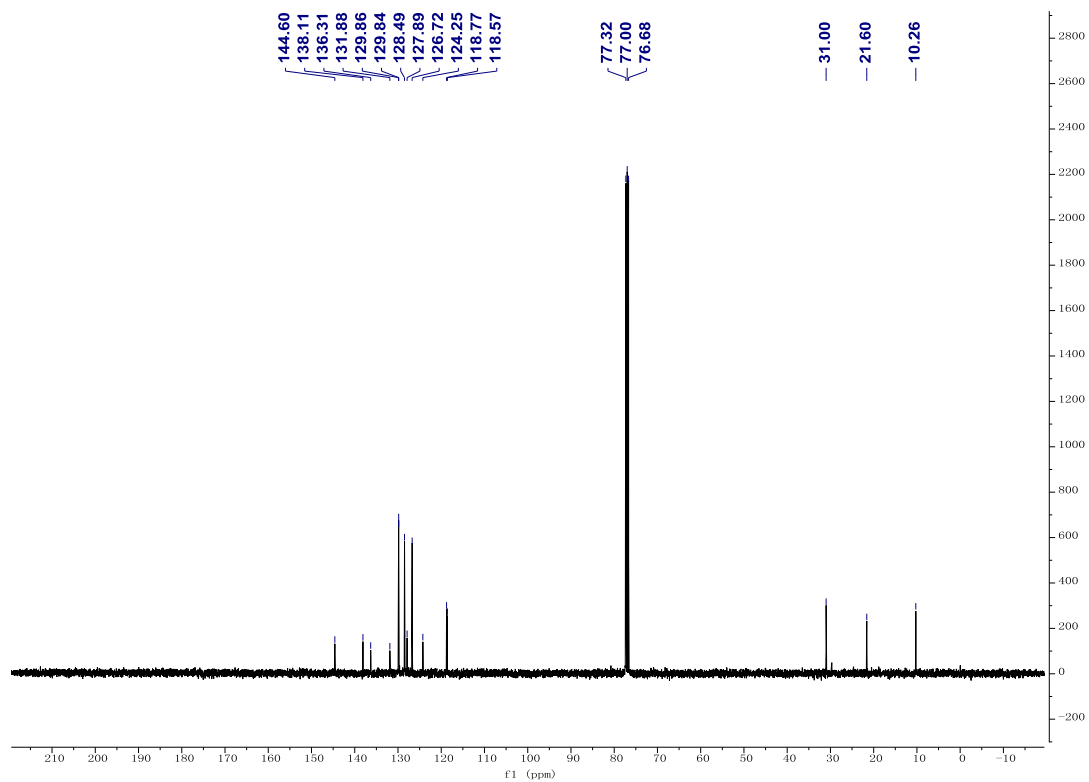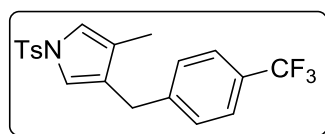

**2h**

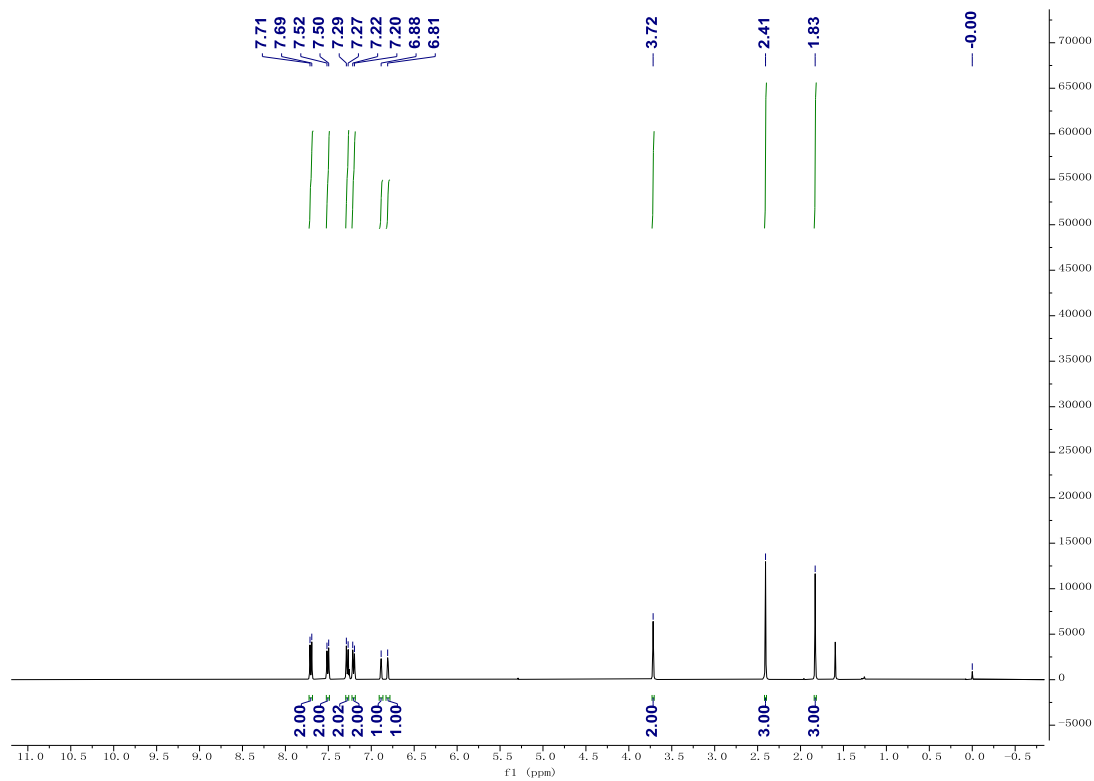

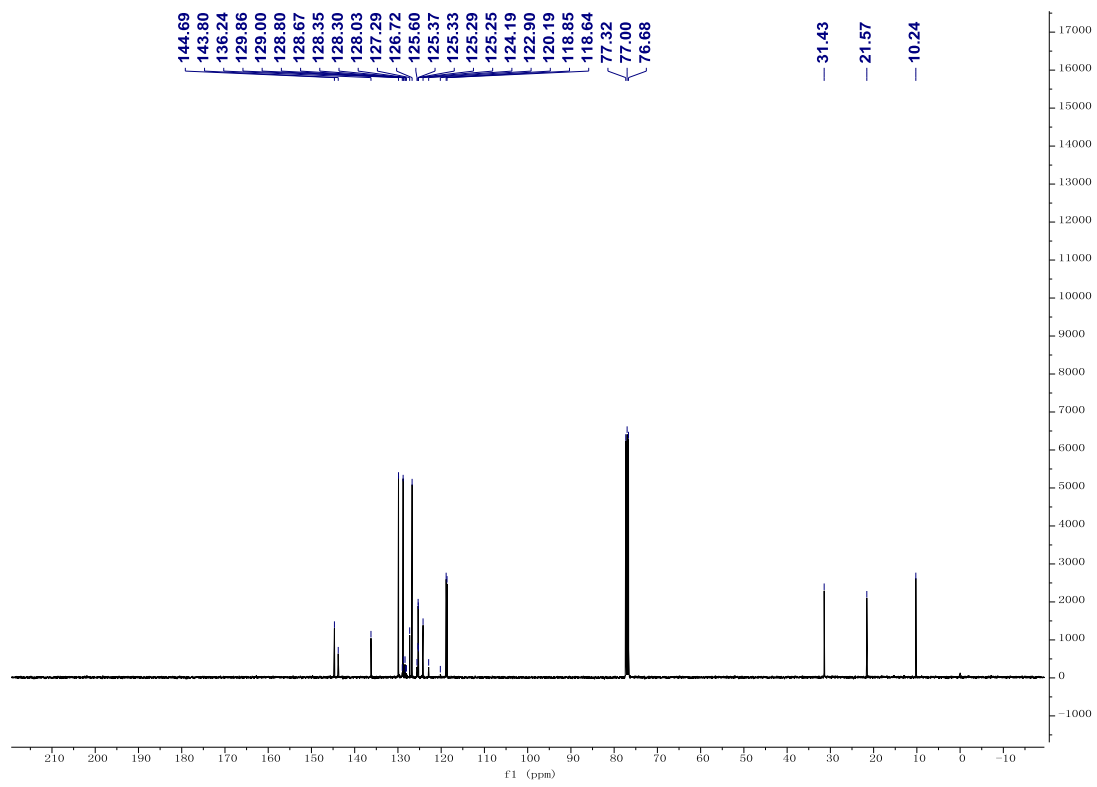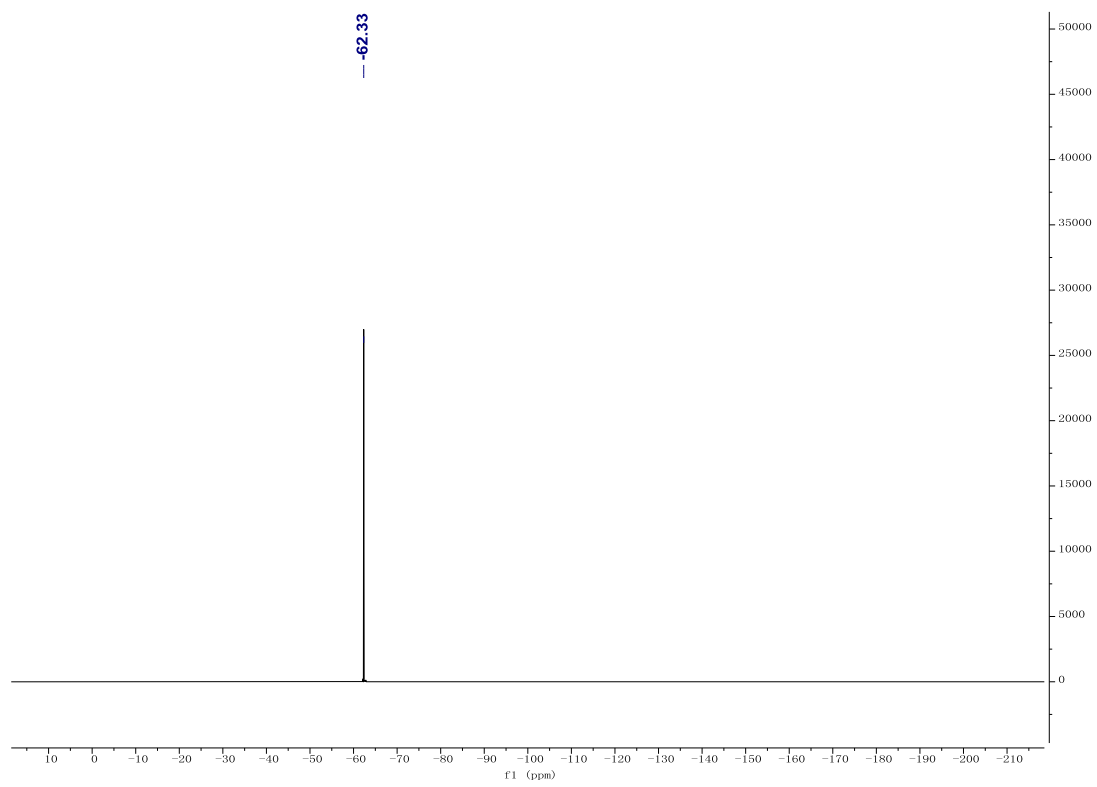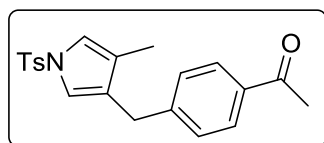

**2i**

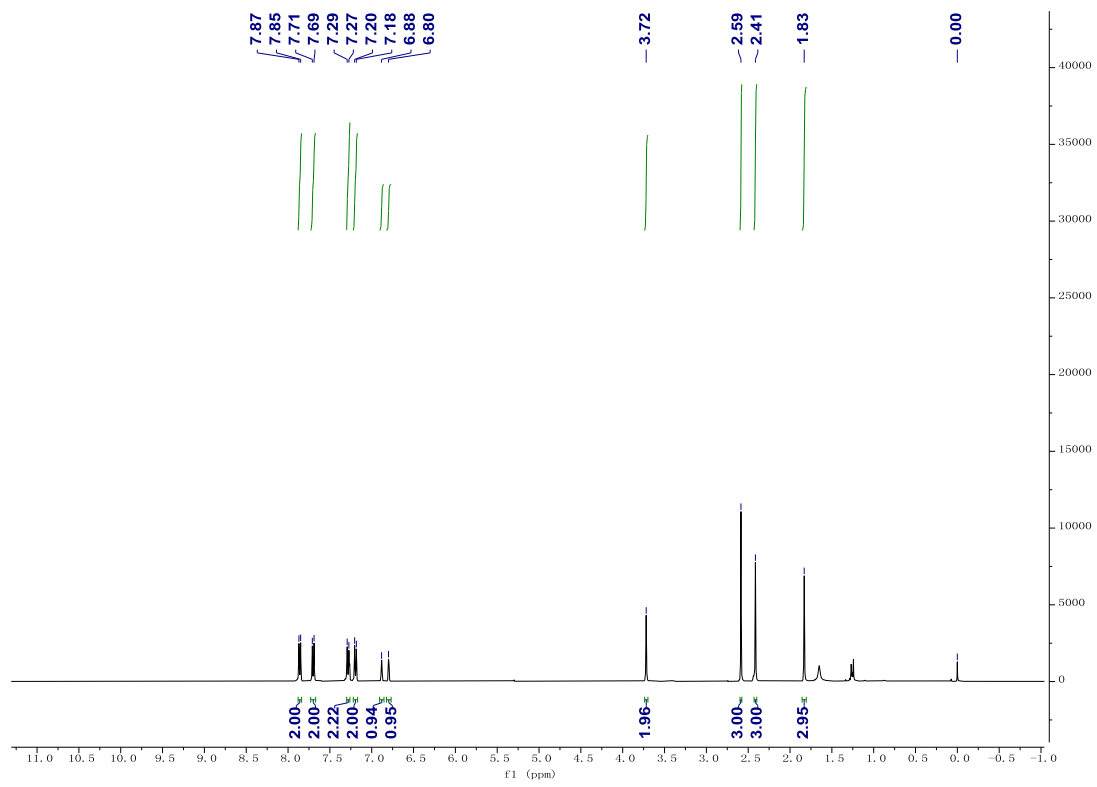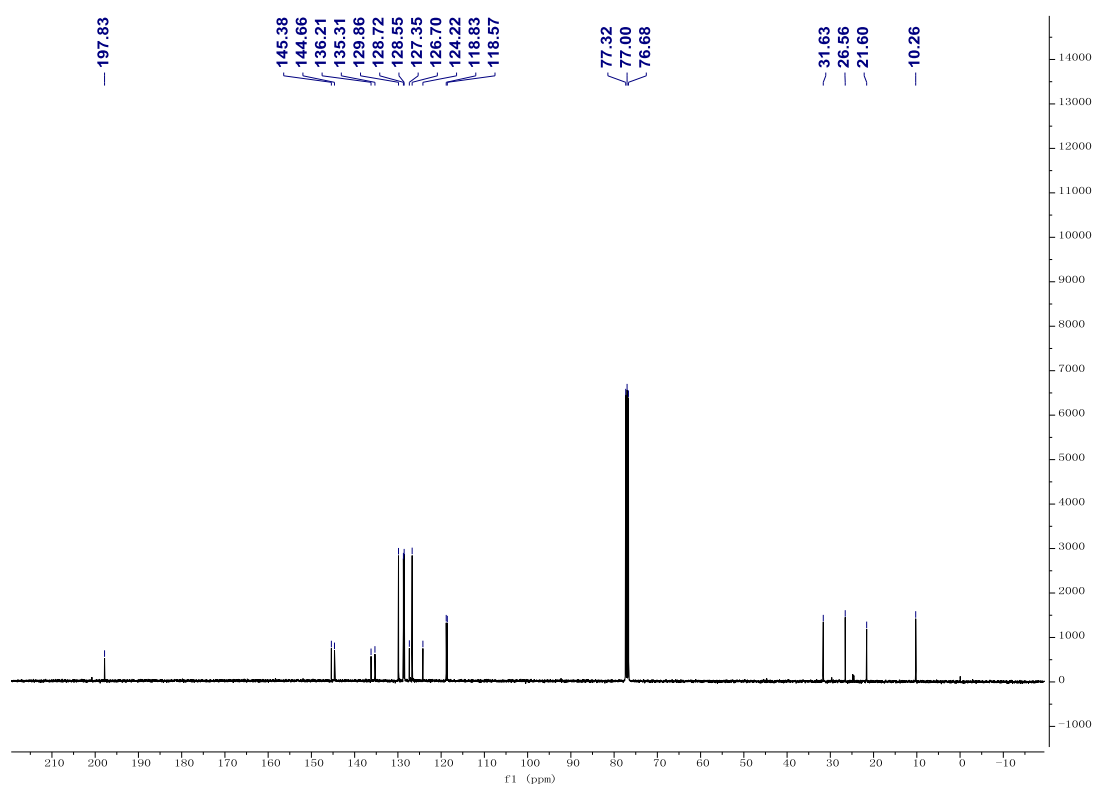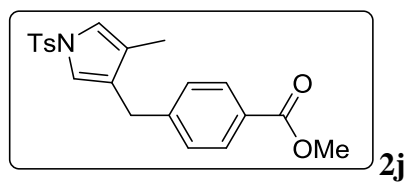



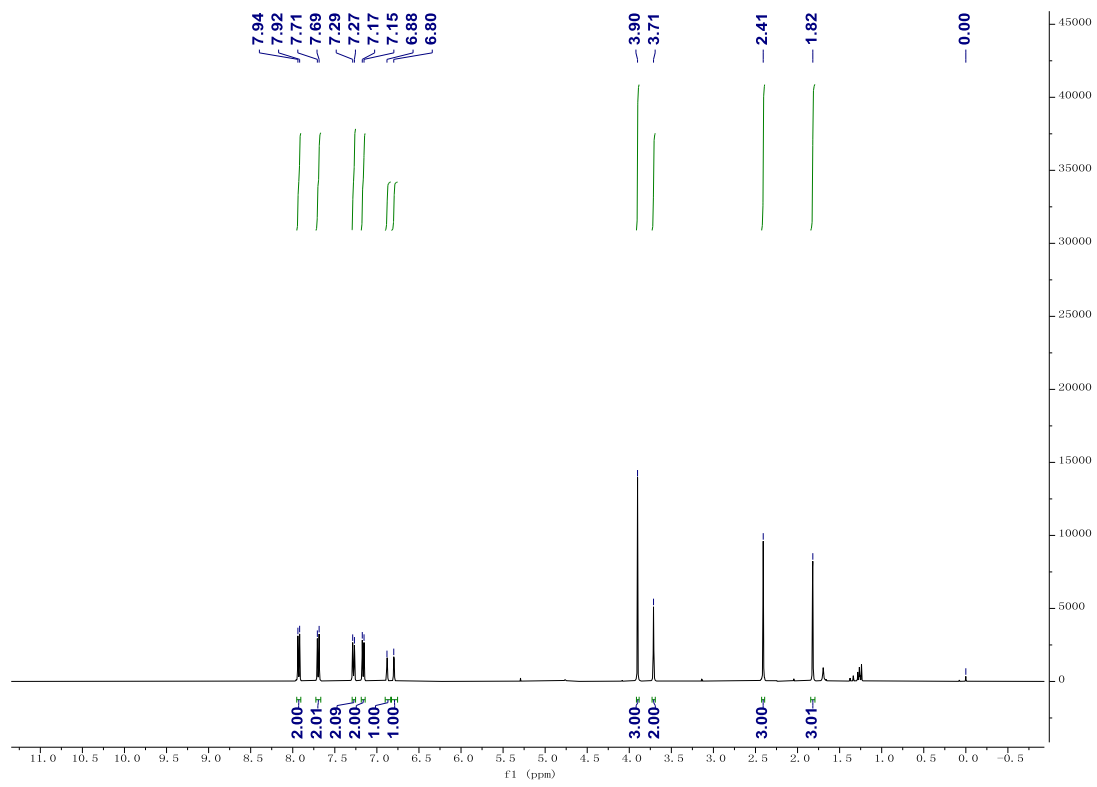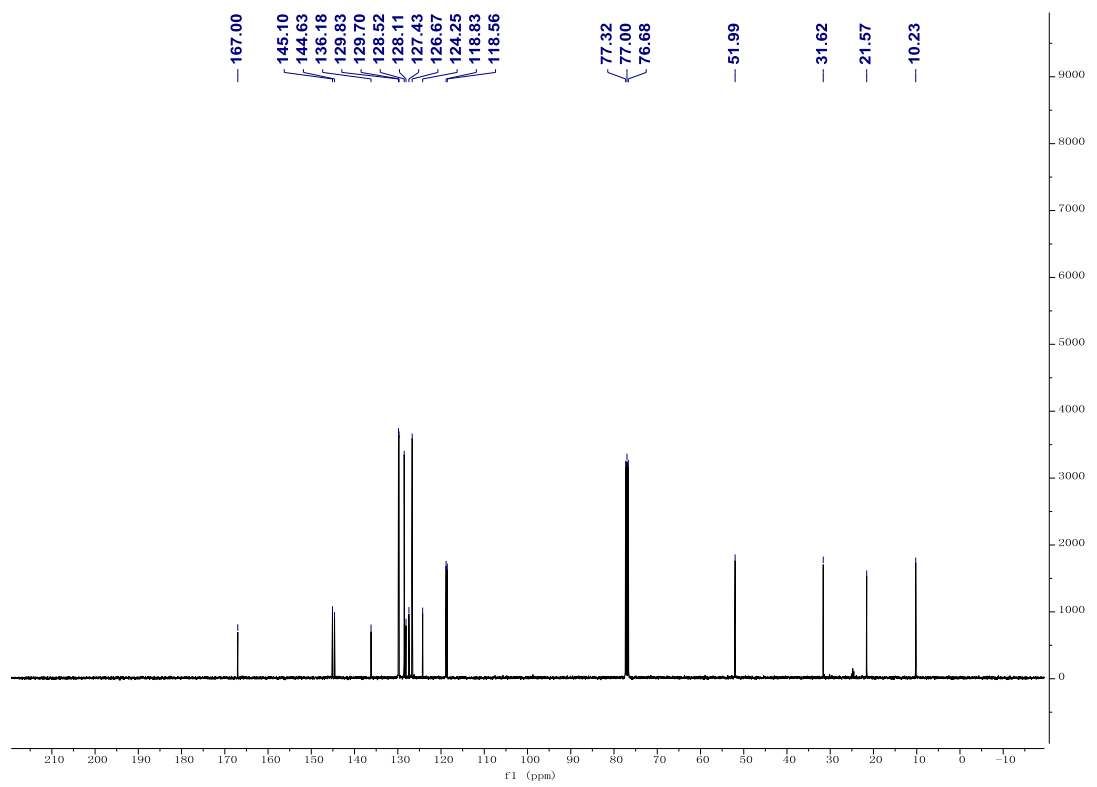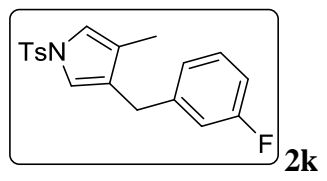

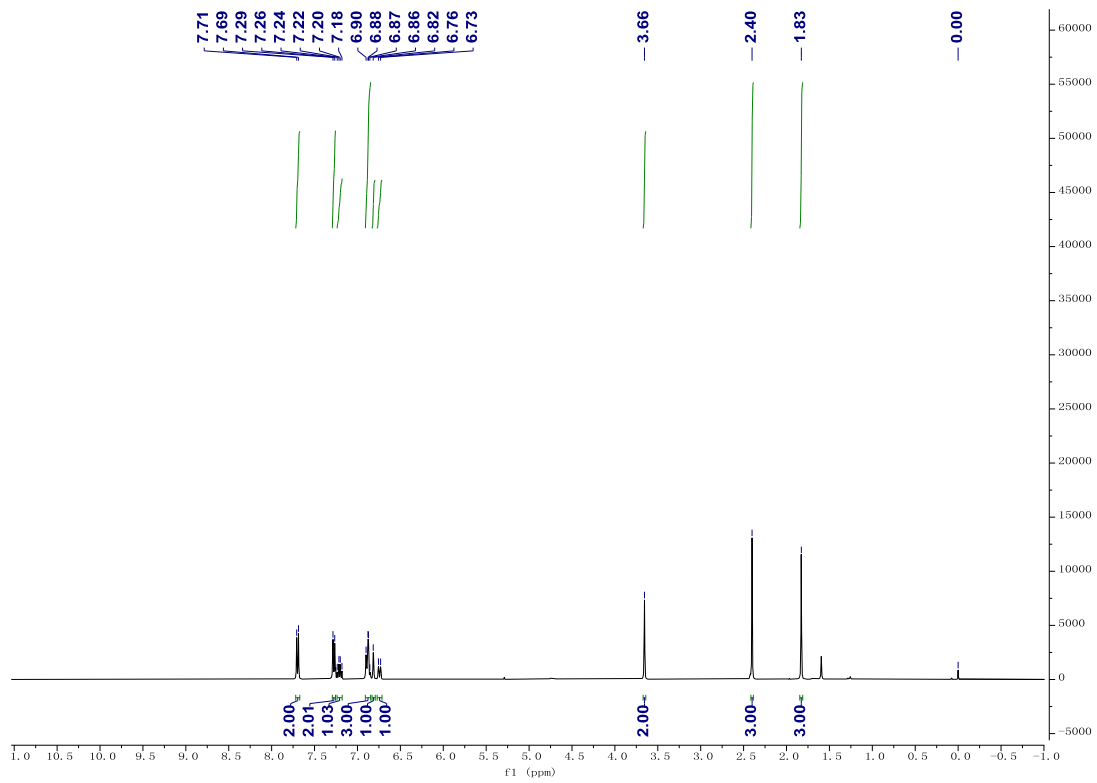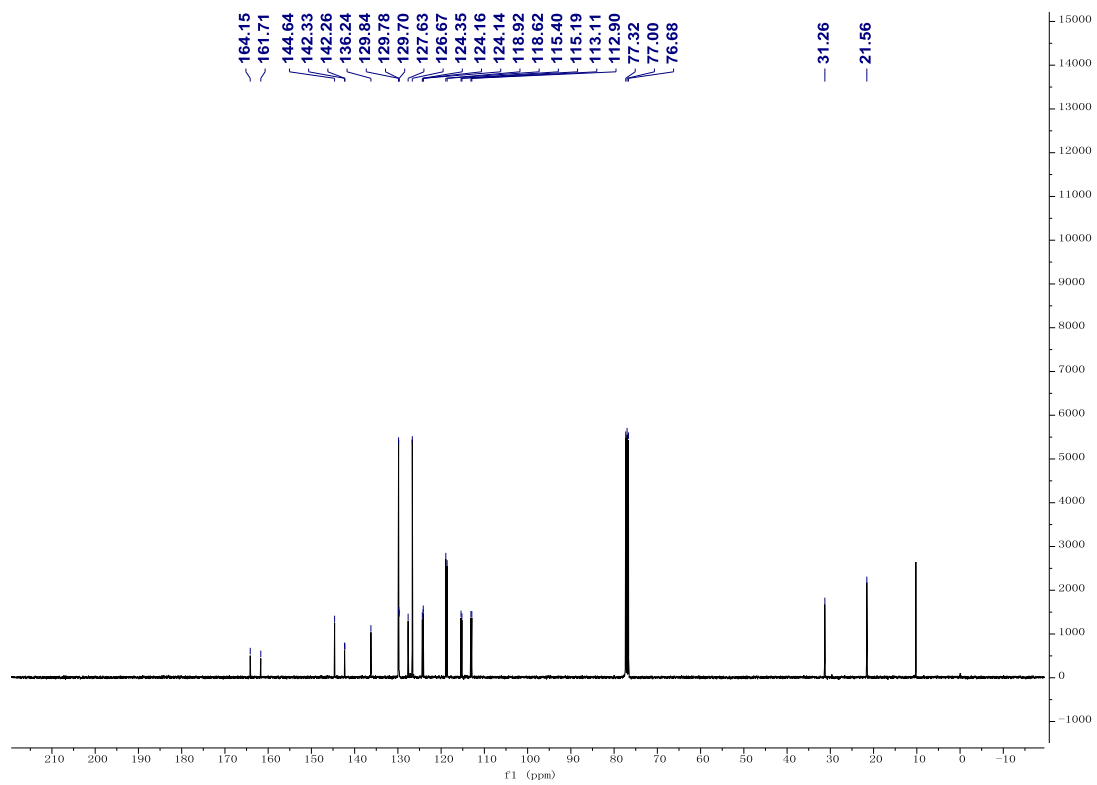

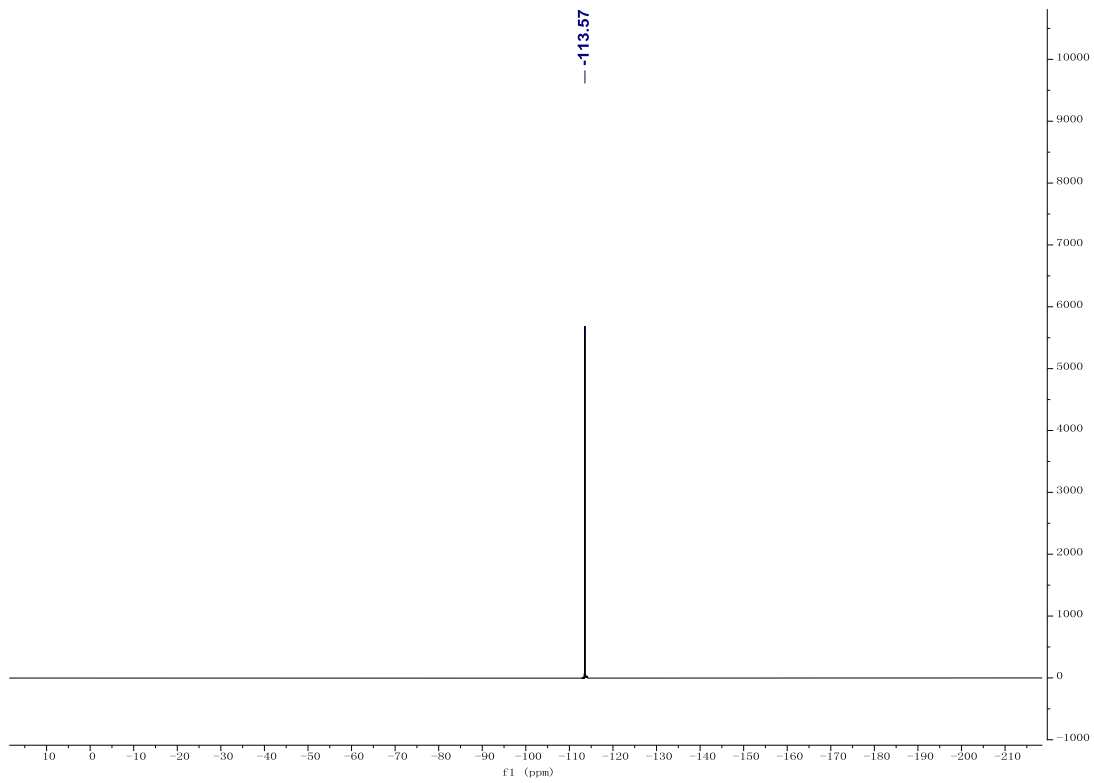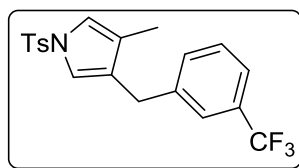

**2l**

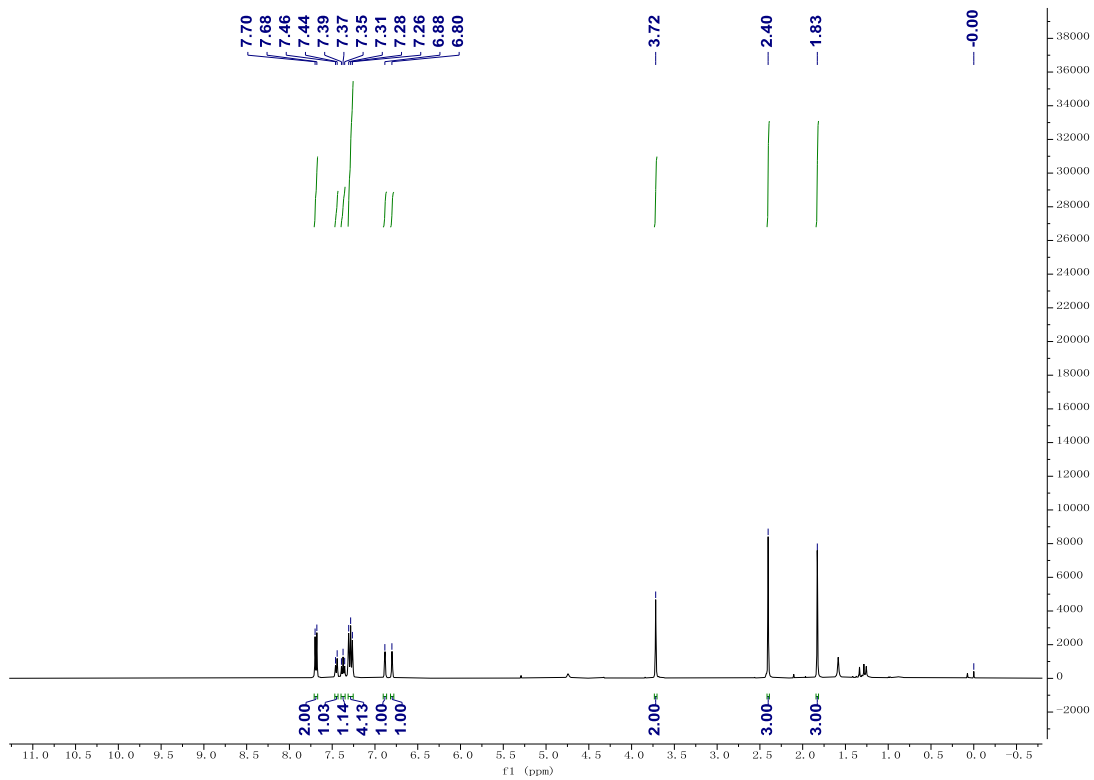

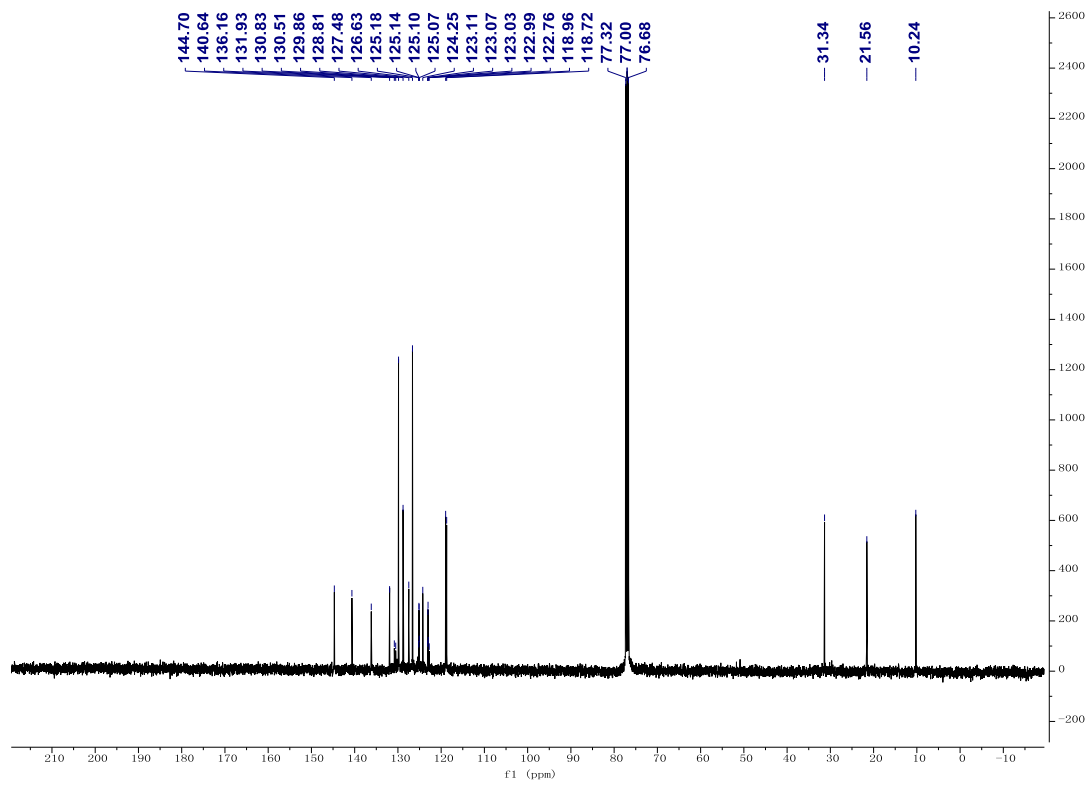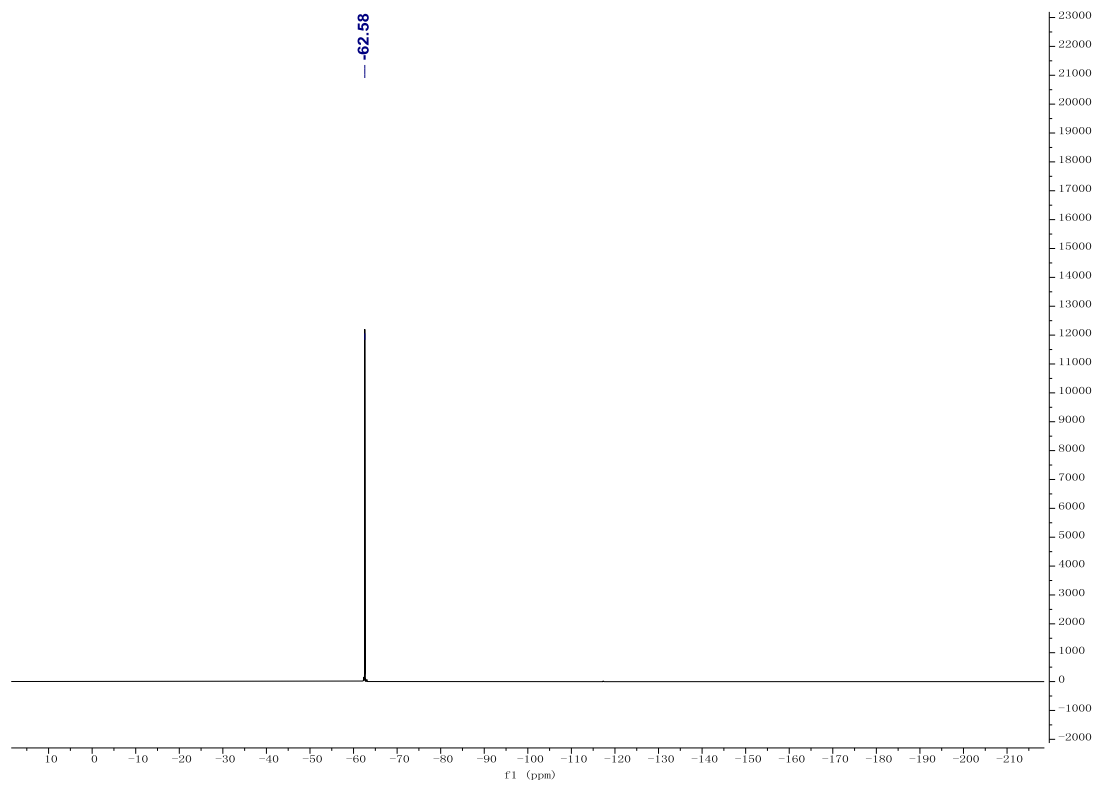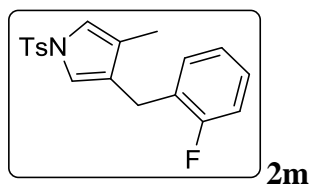

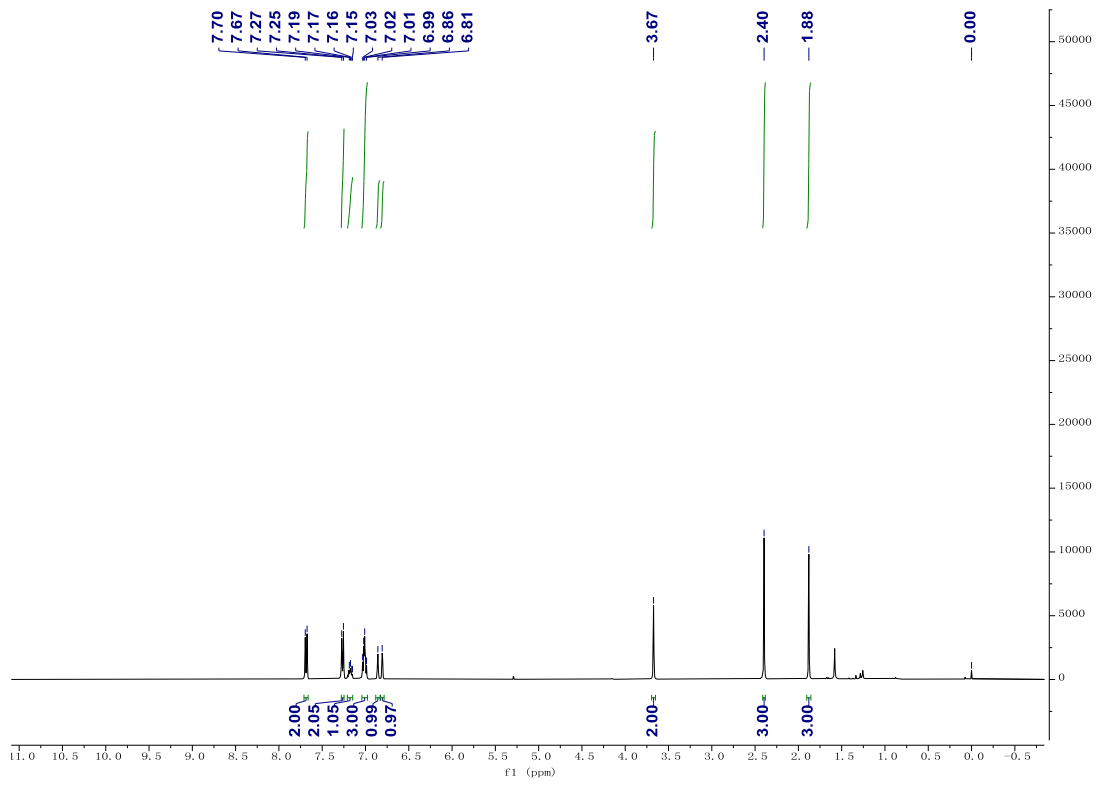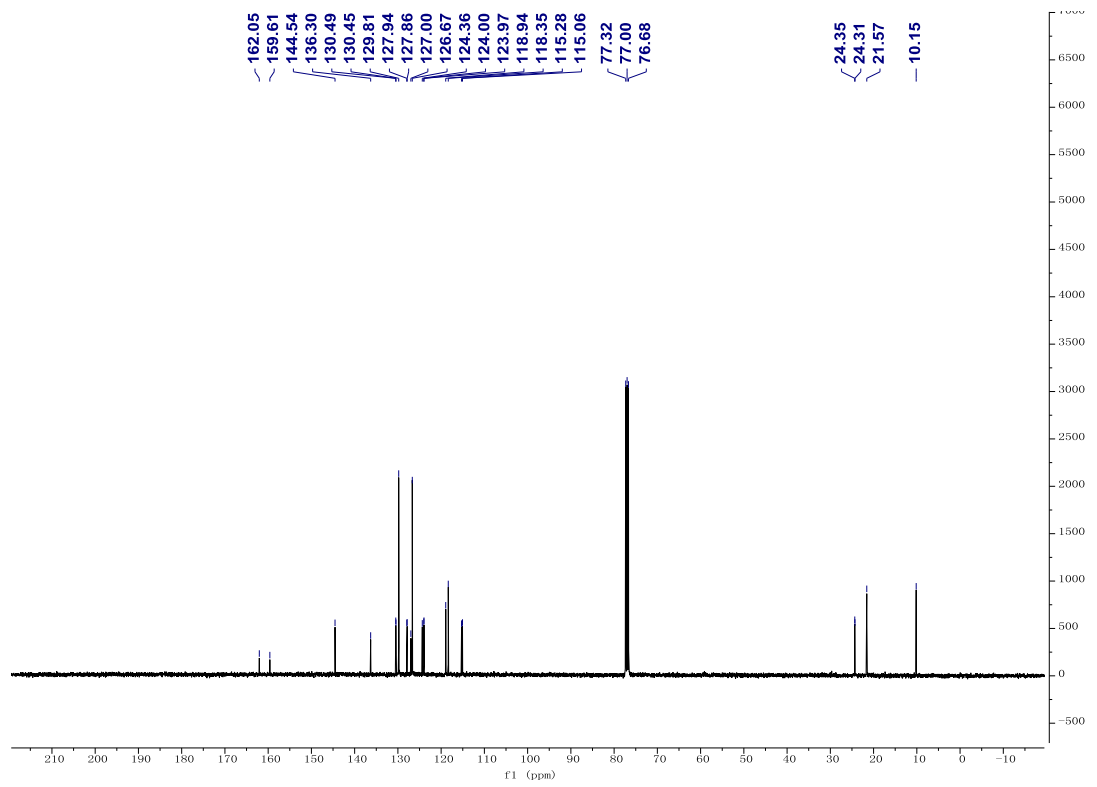

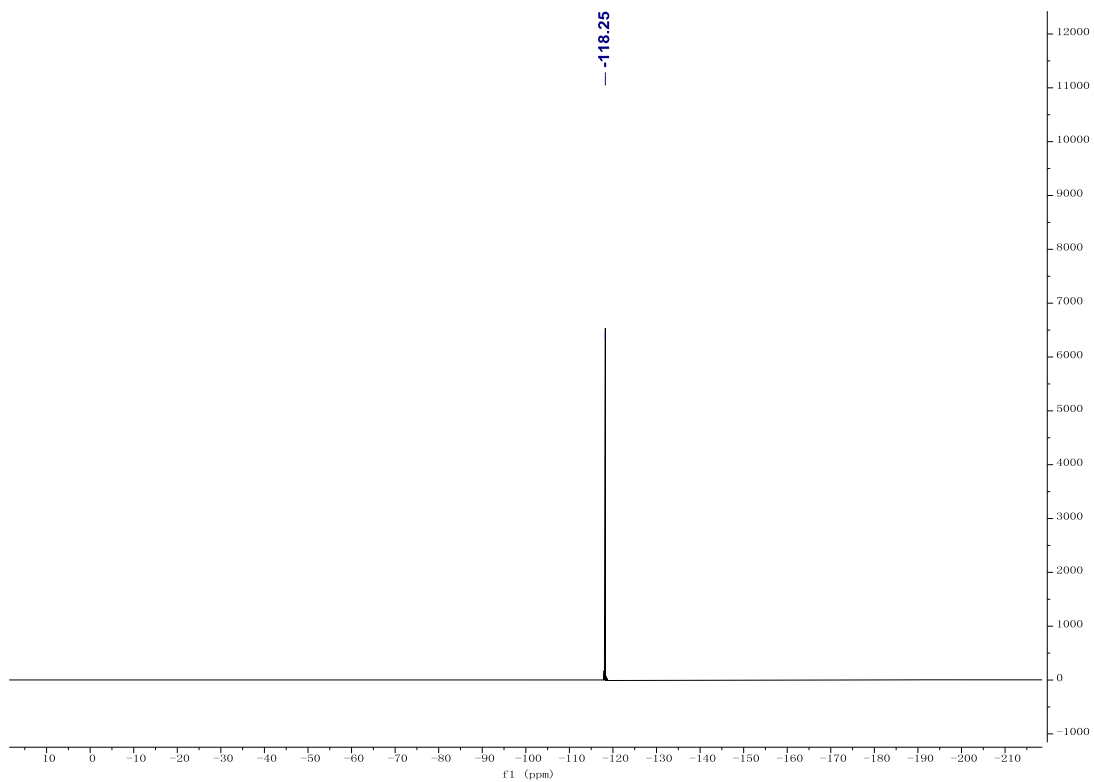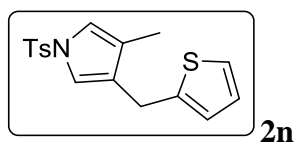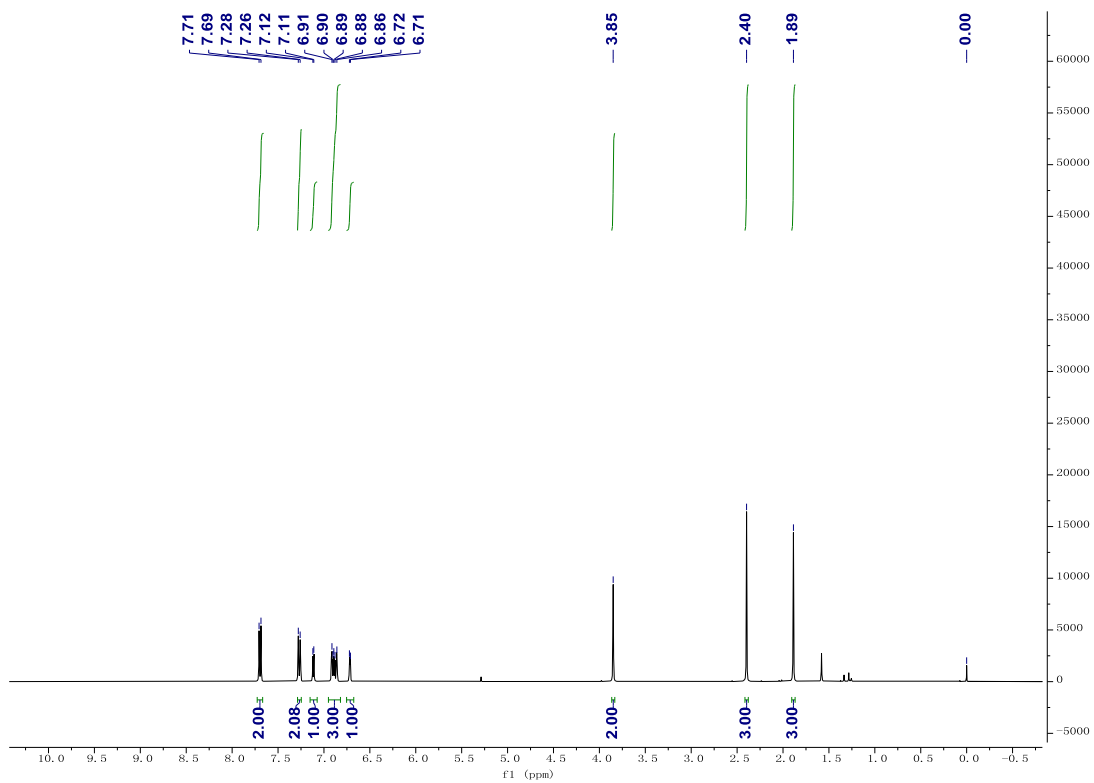

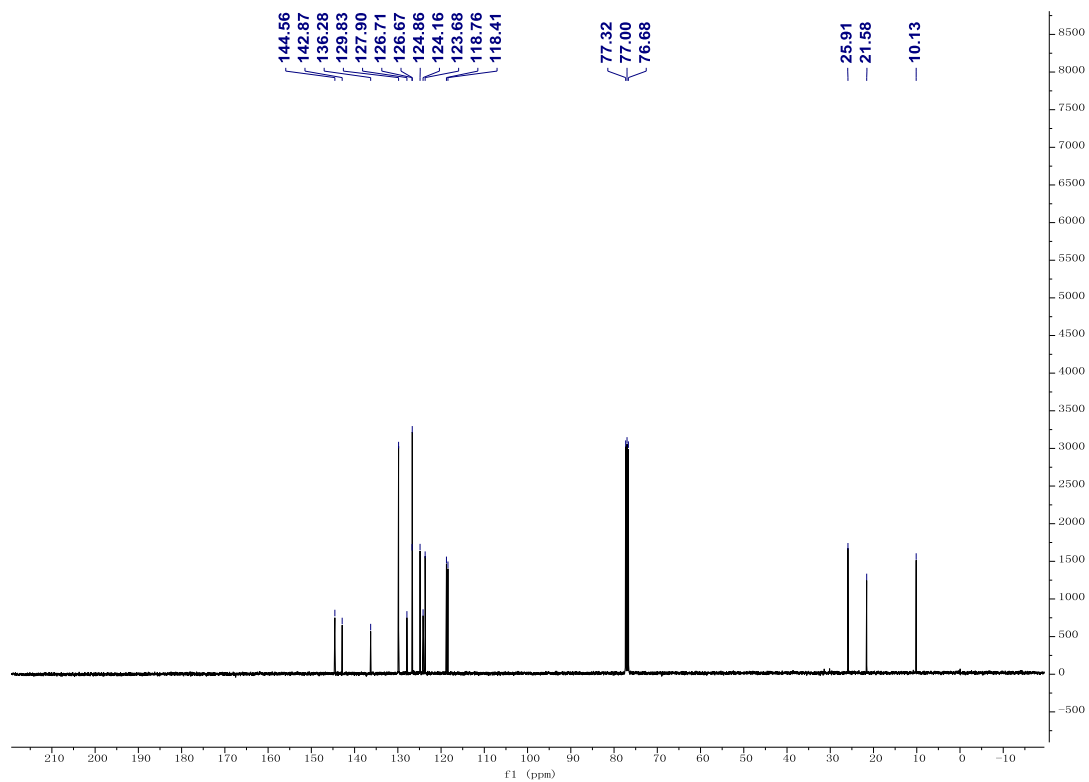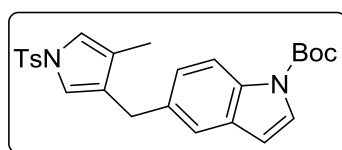

**20**

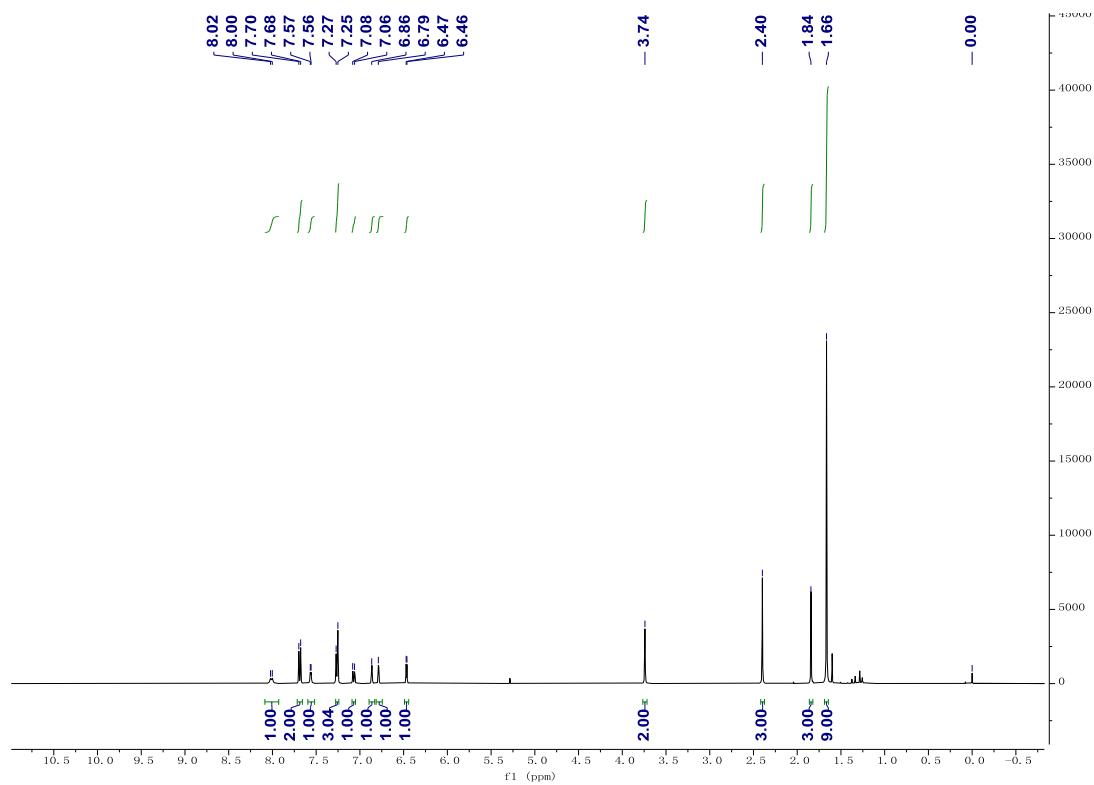

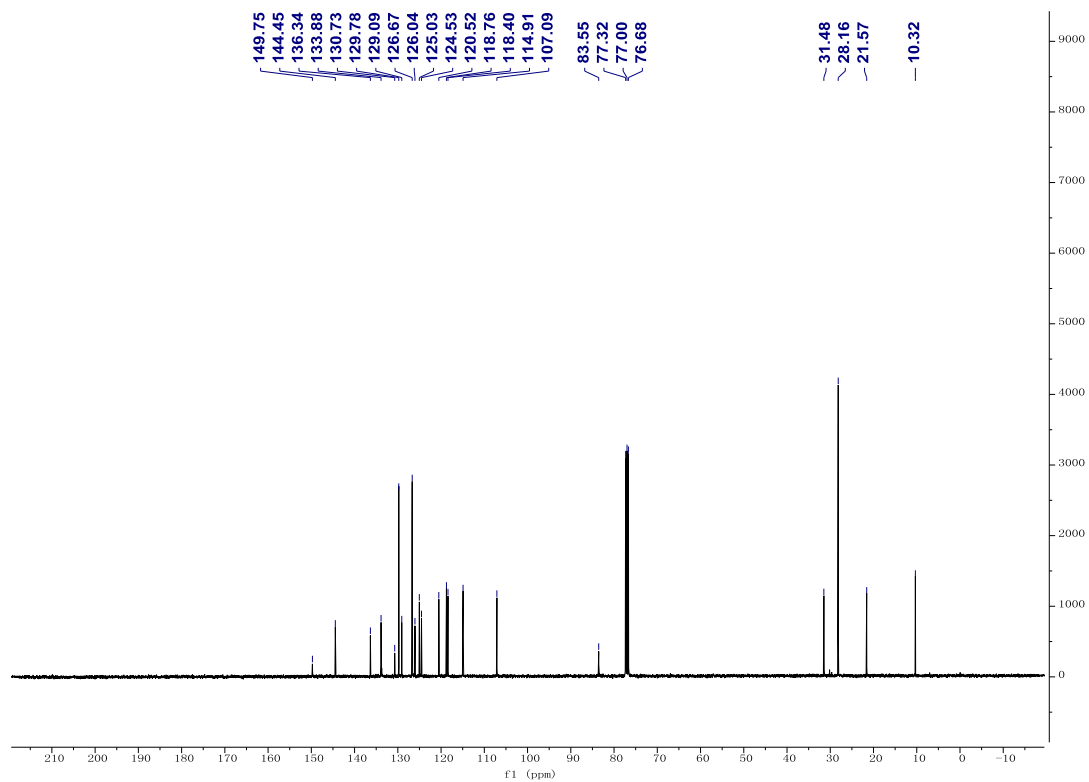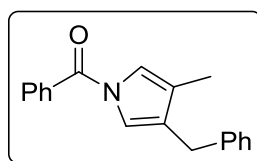

**2p**

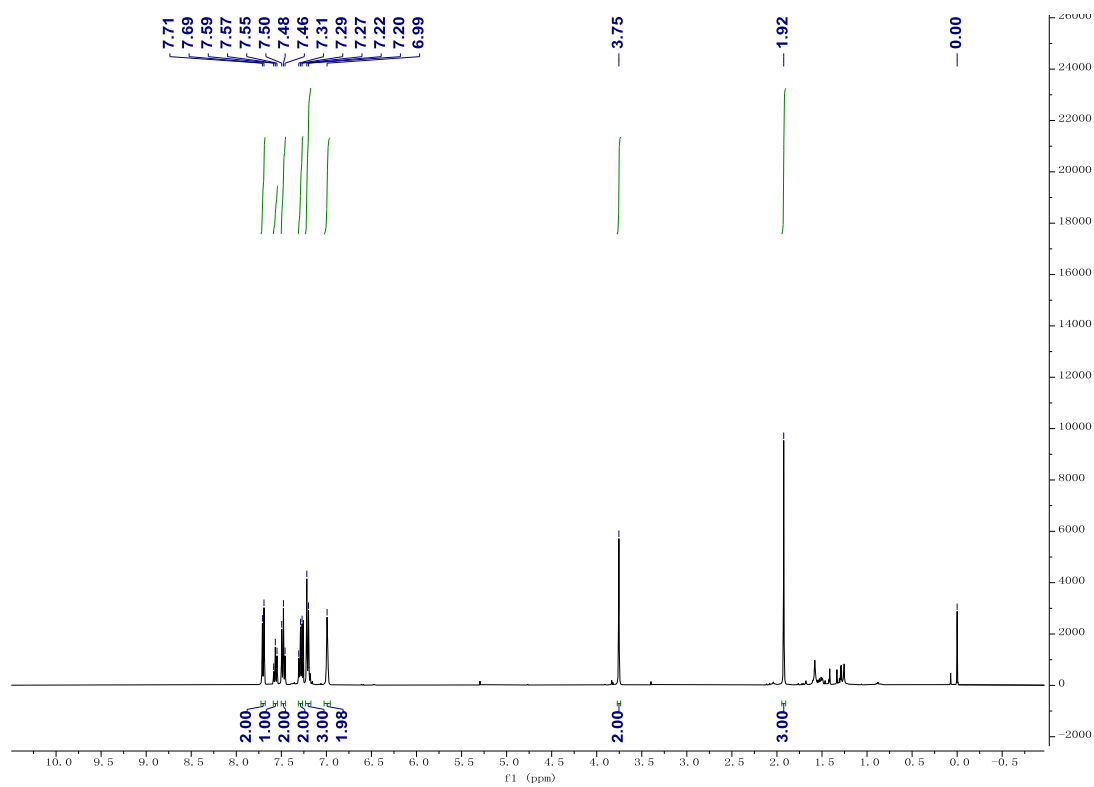



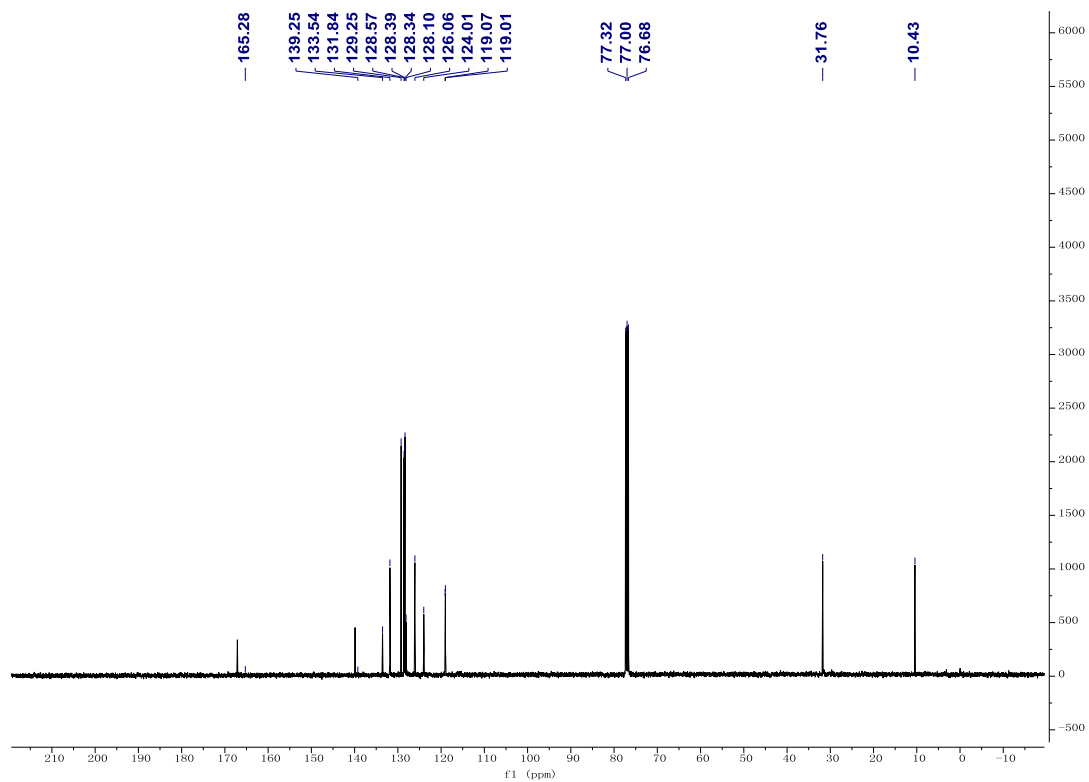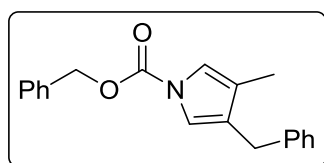

2q

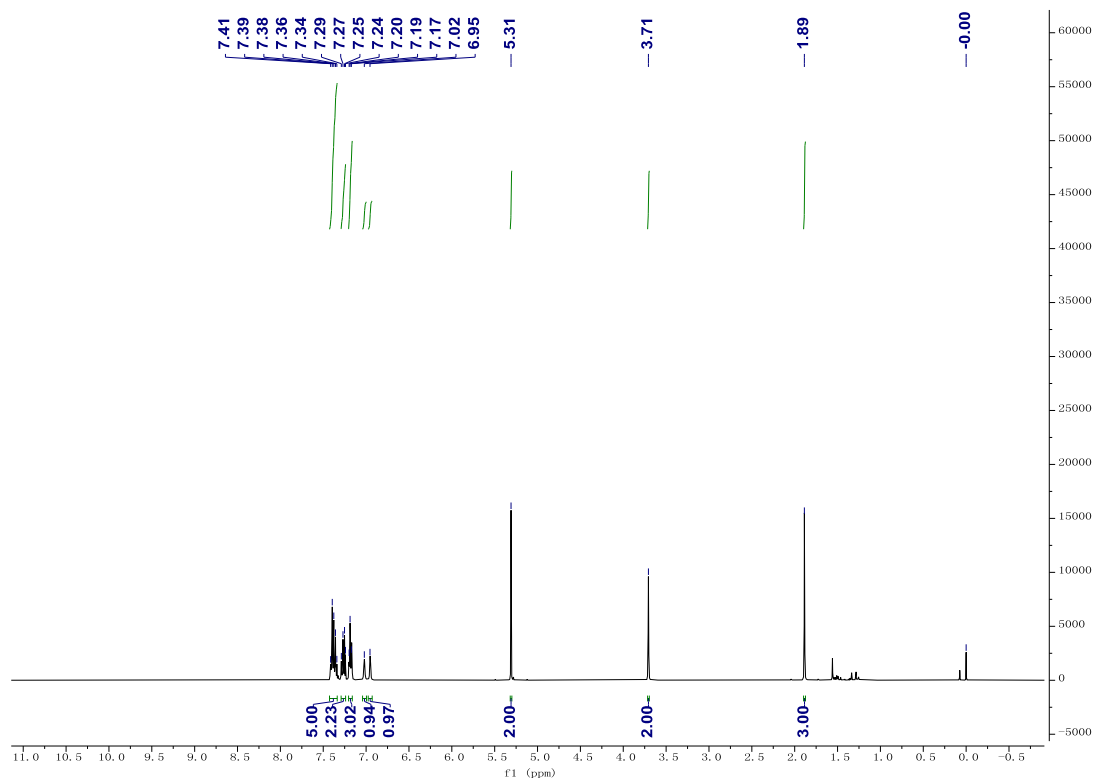

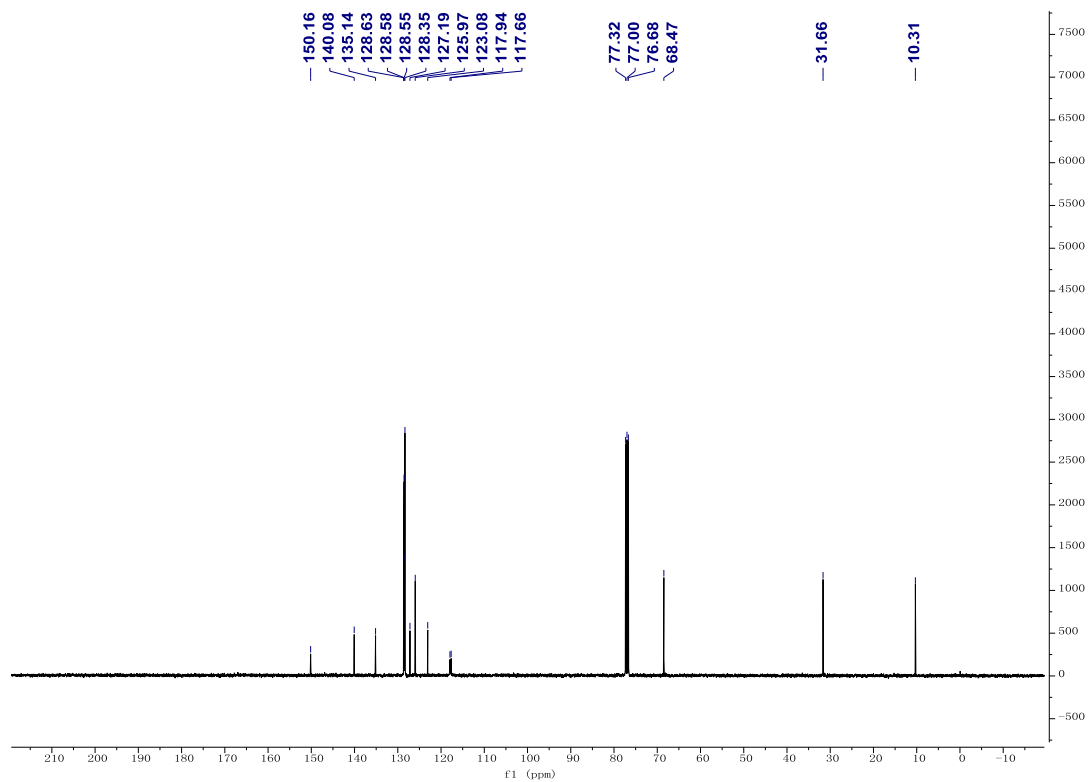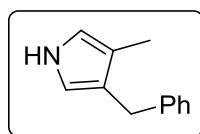

7

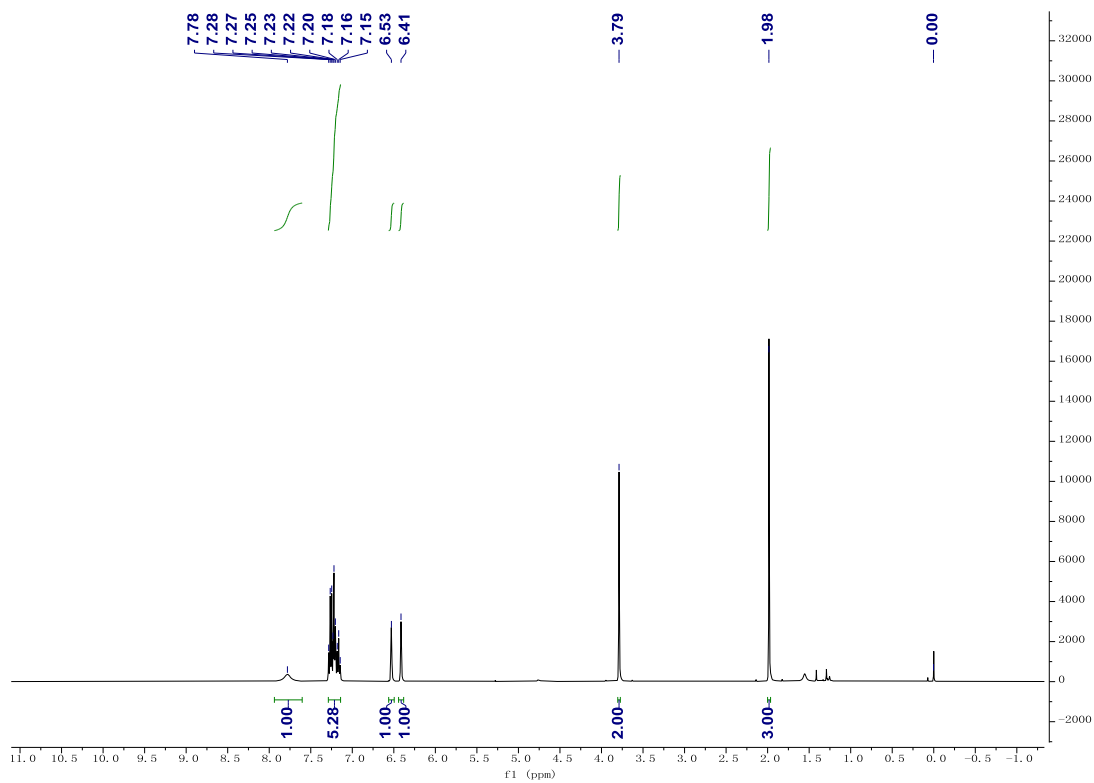

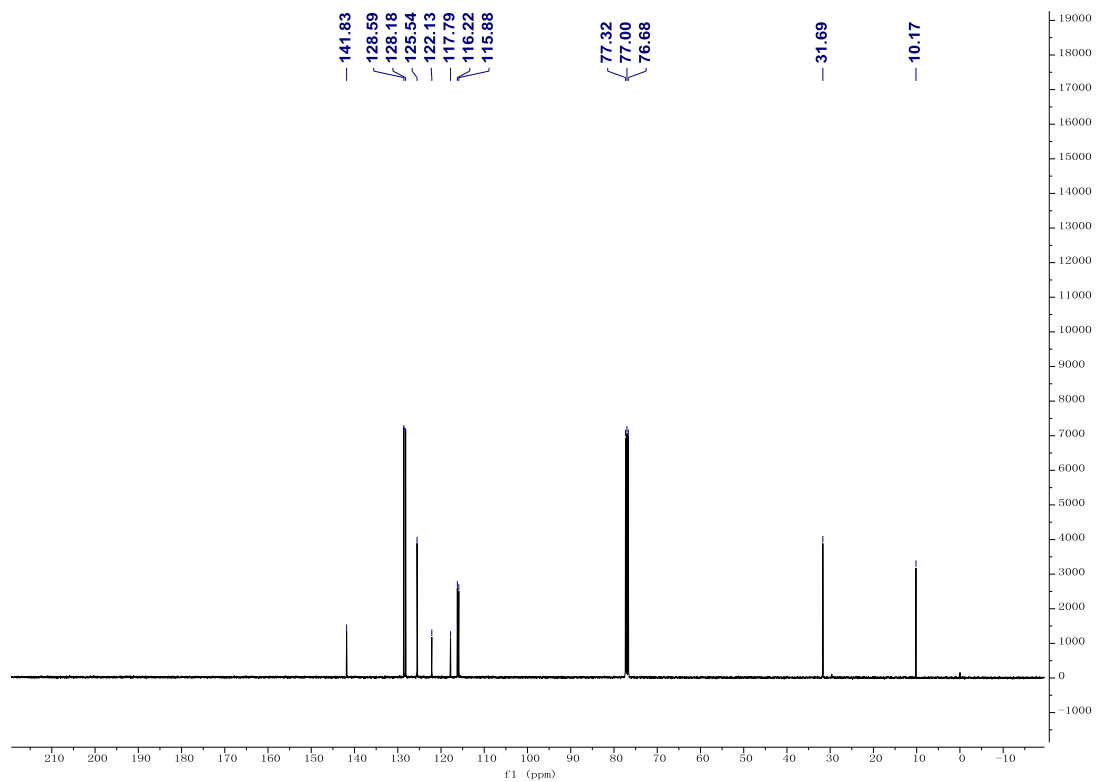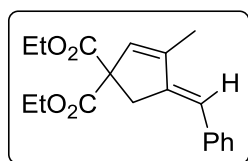

**4a**

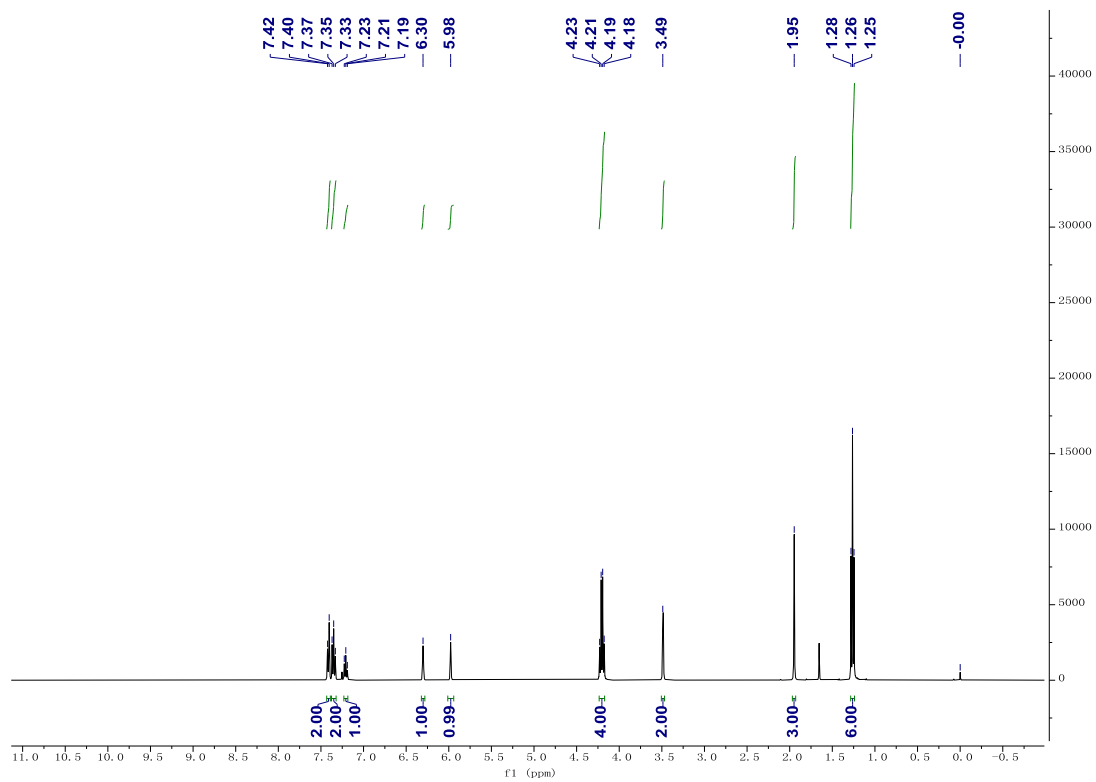

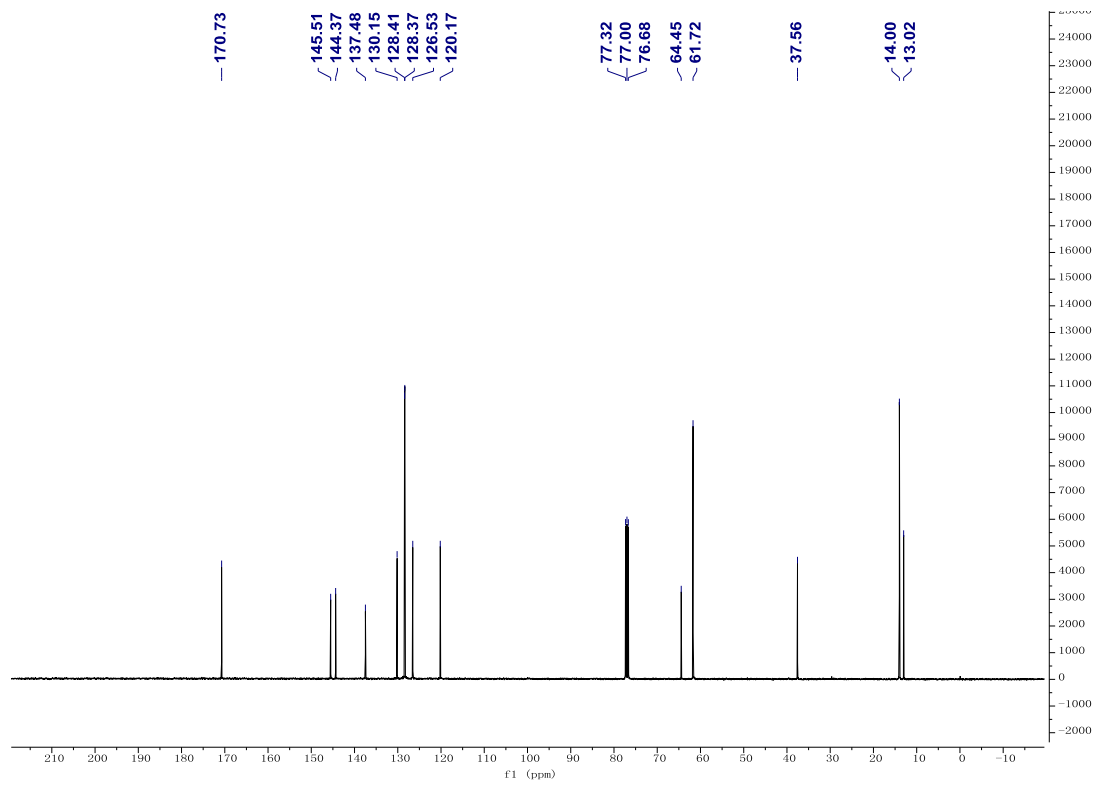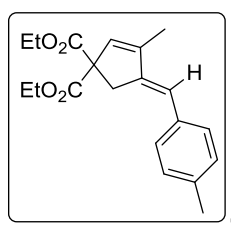

**4b**

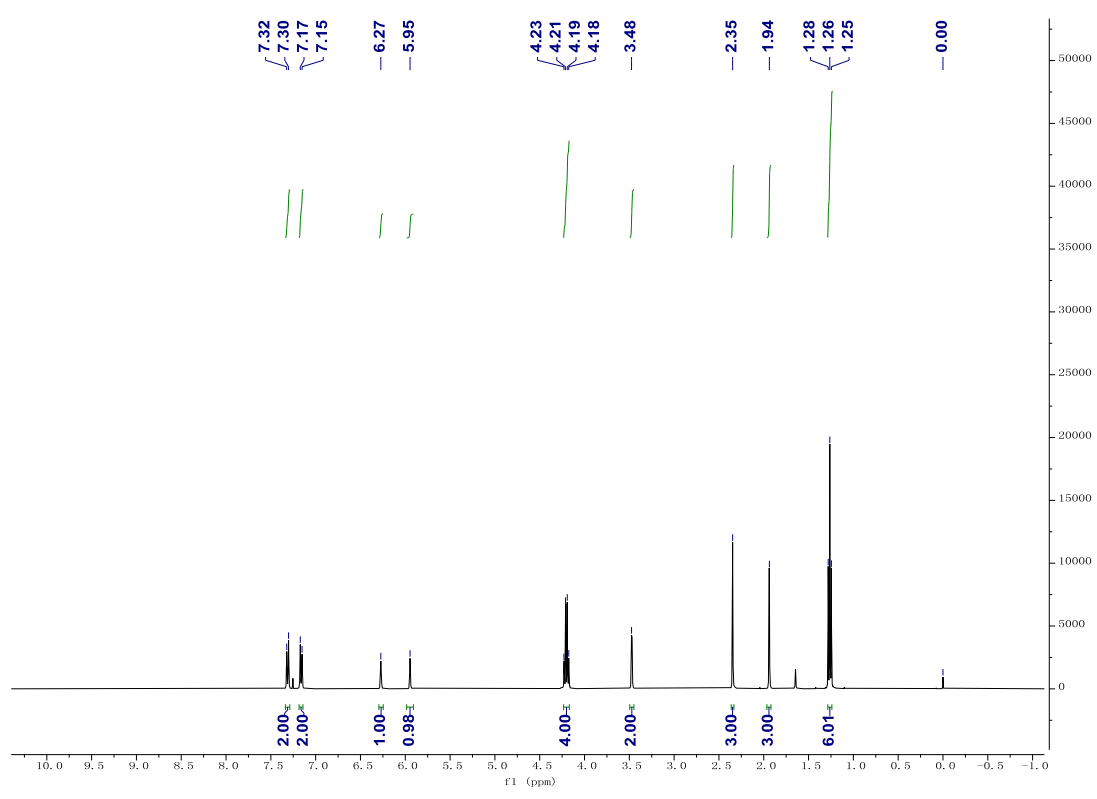

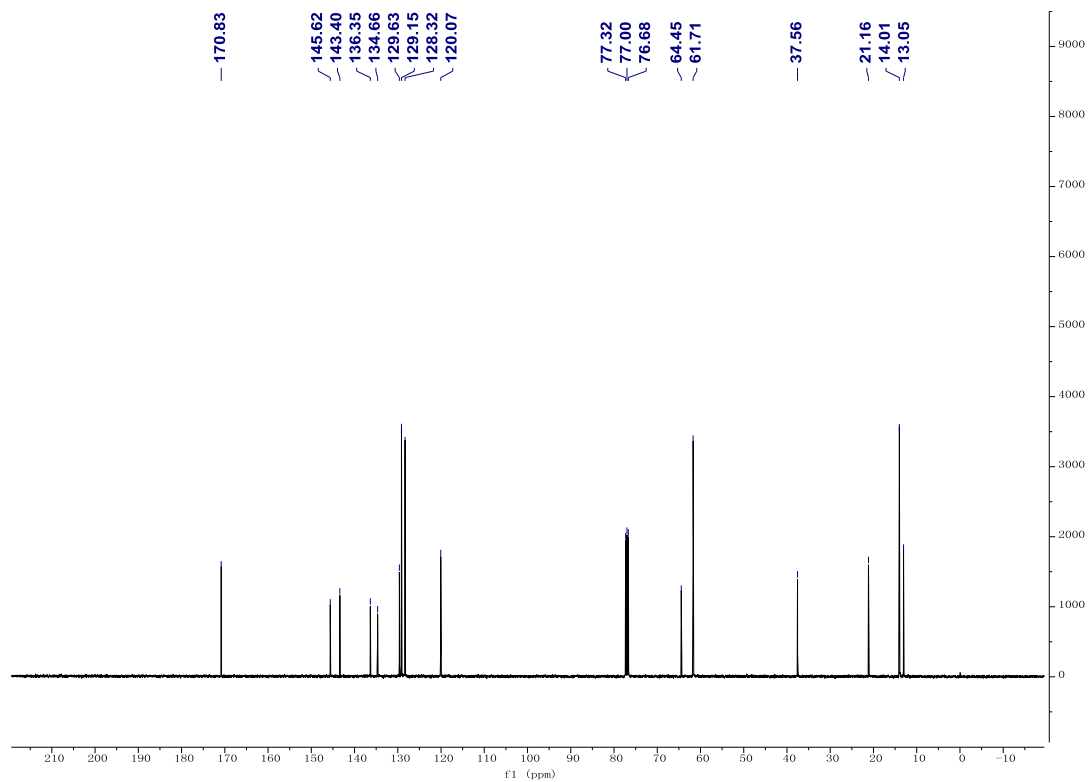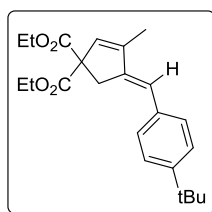

4c

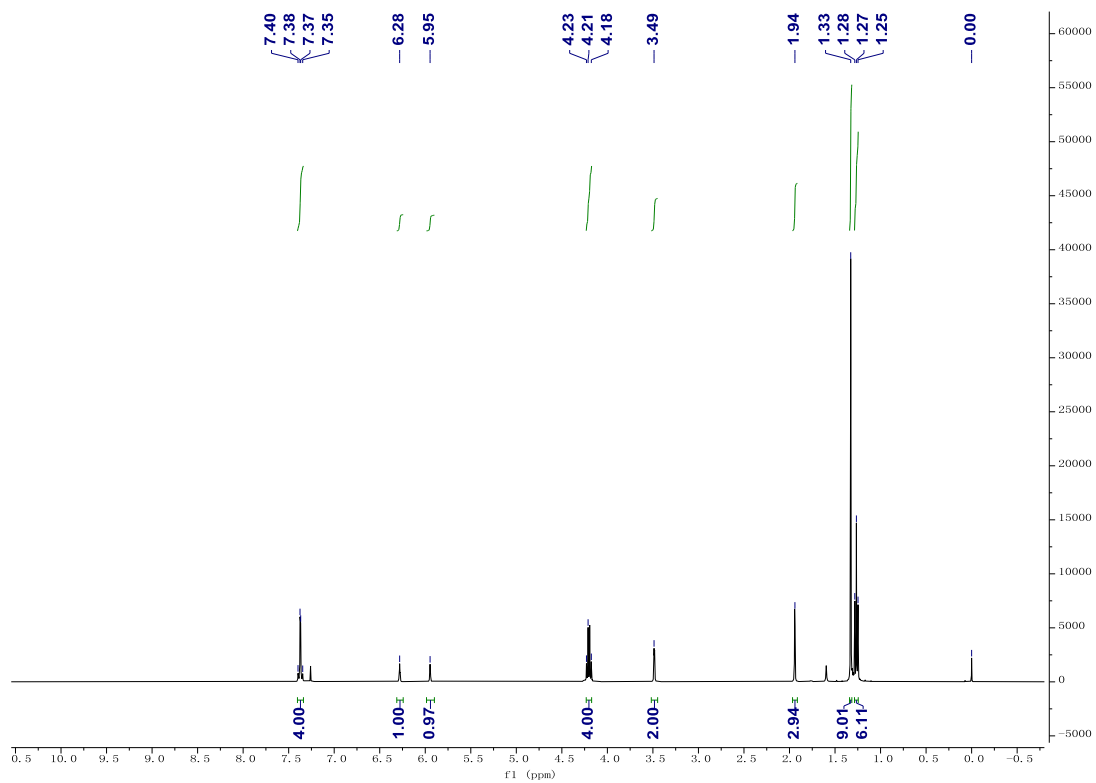

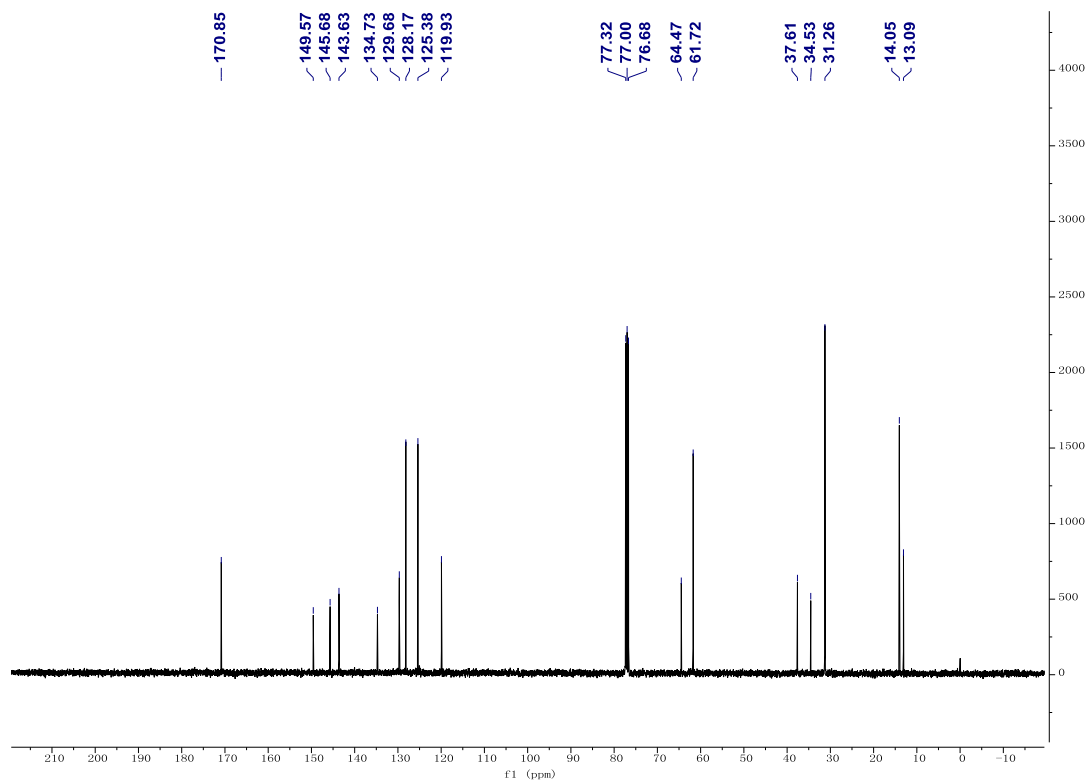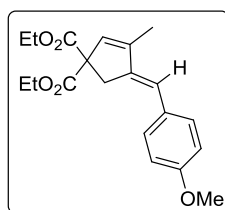

**4d**

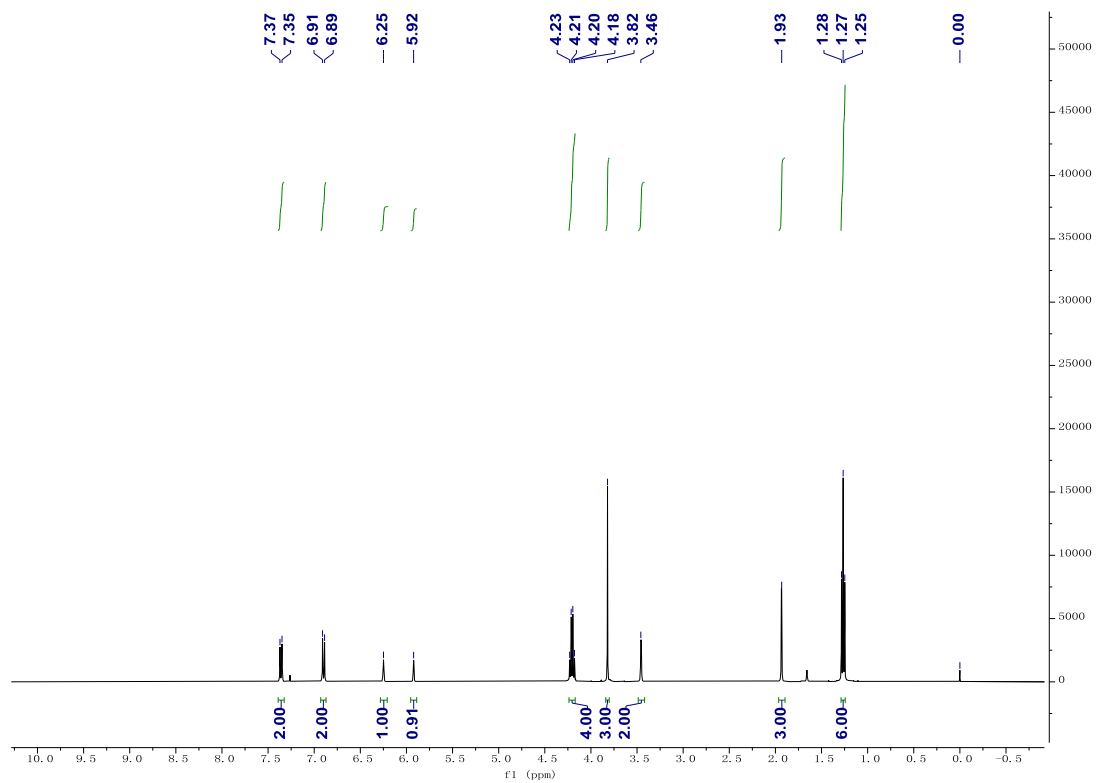

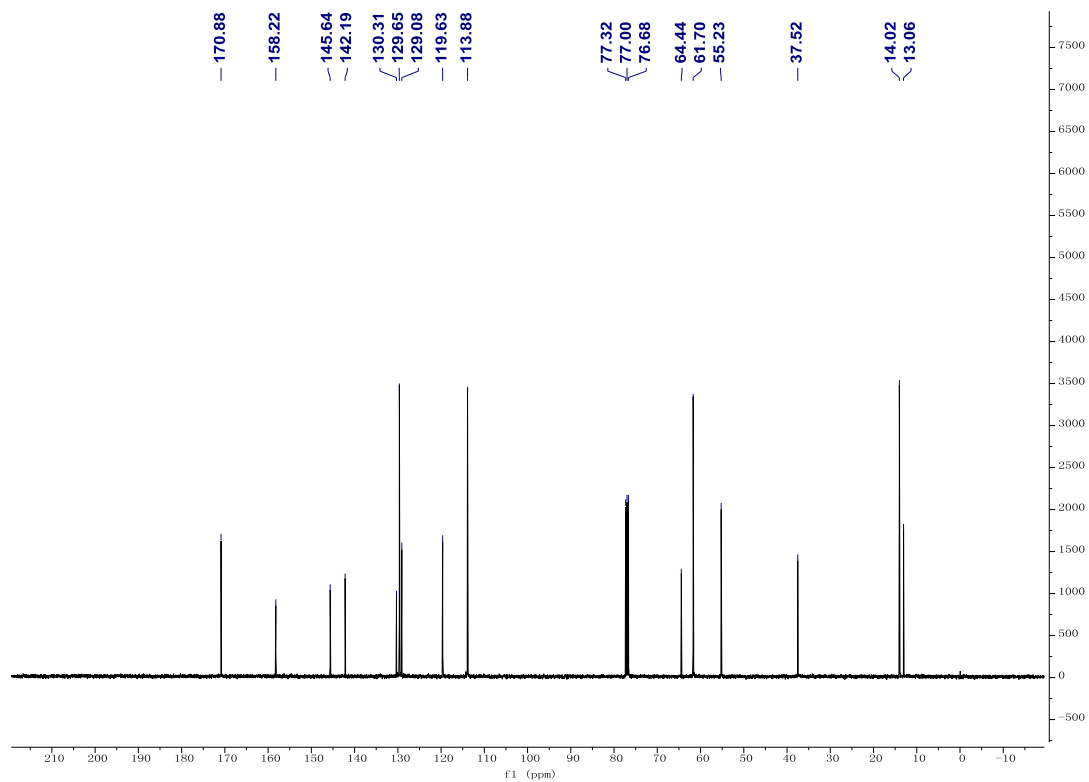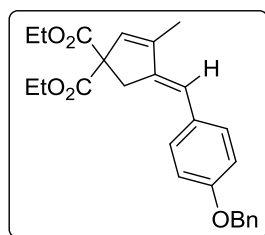

**4e**

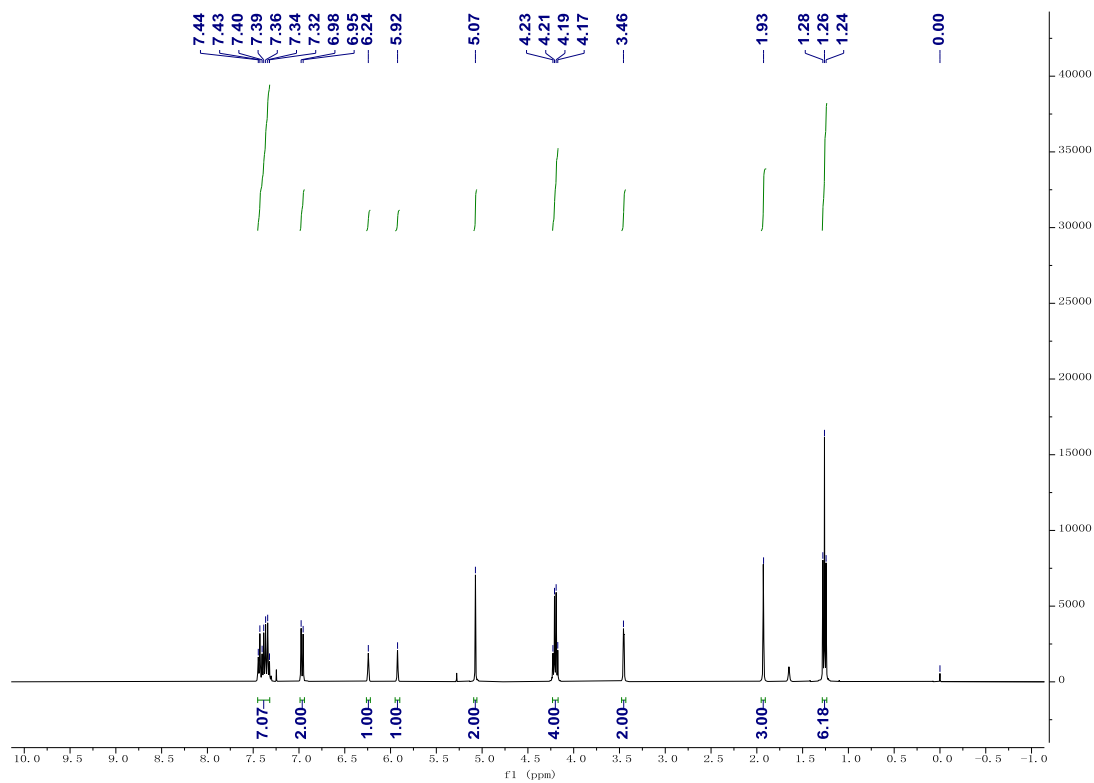

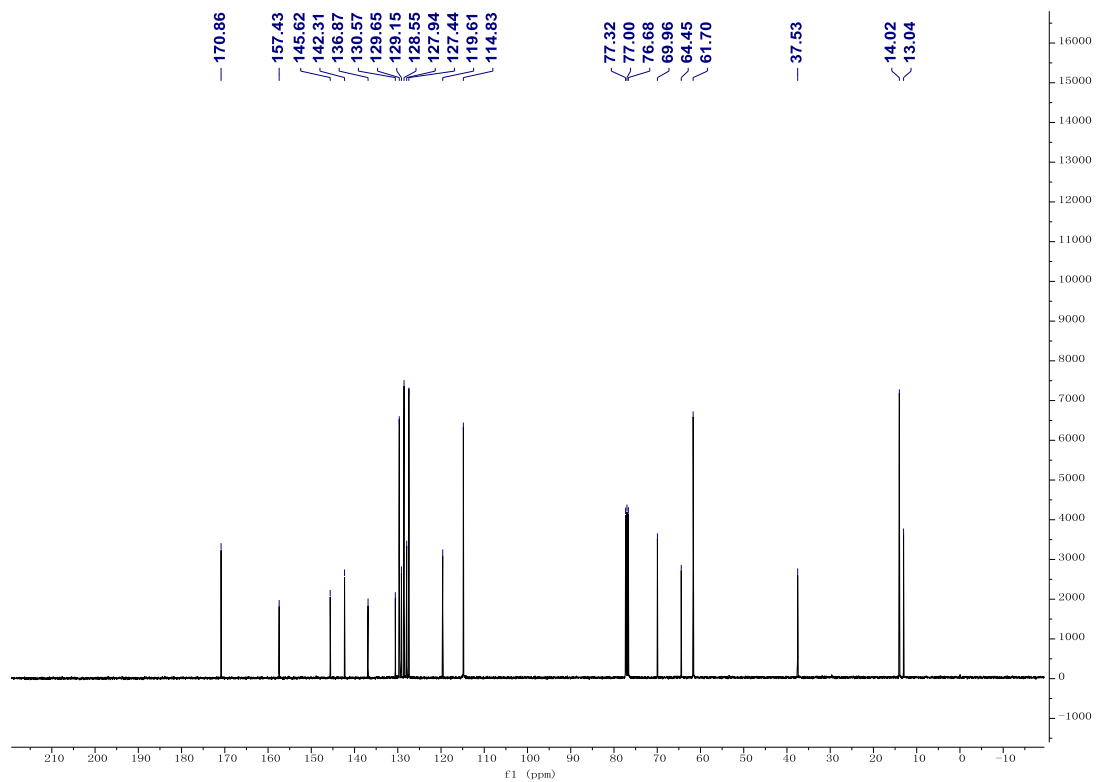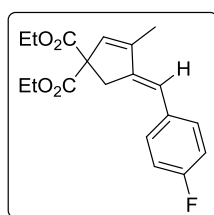

**4f**

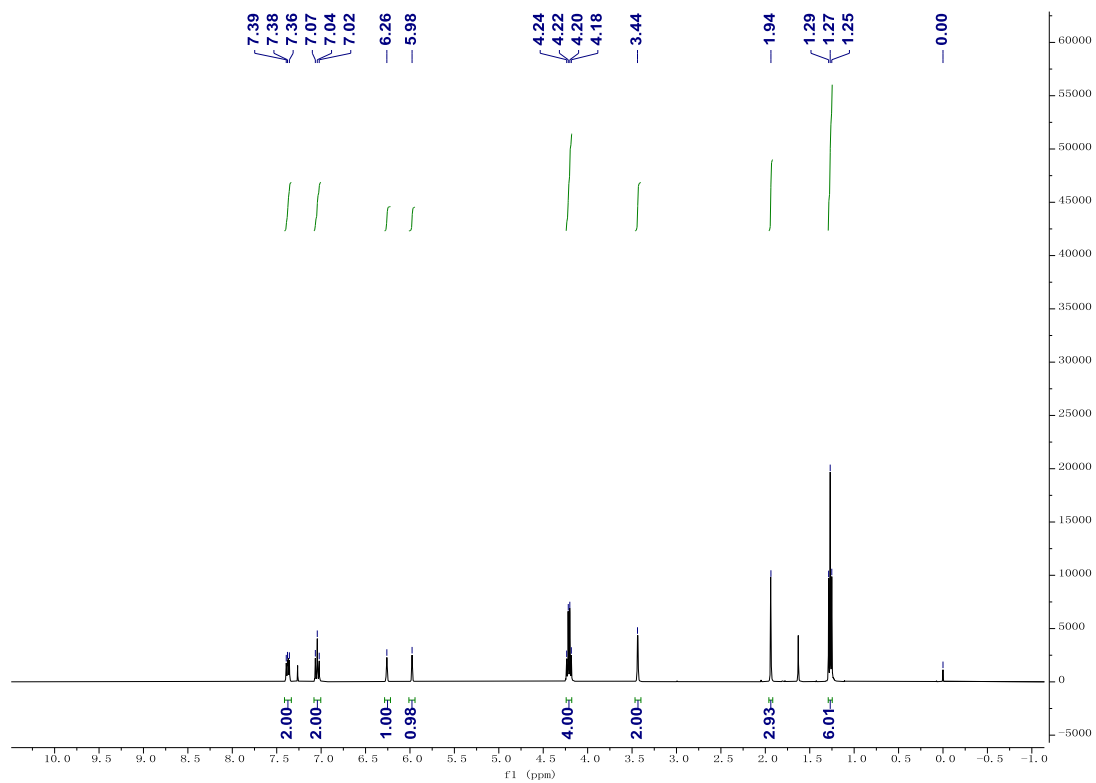



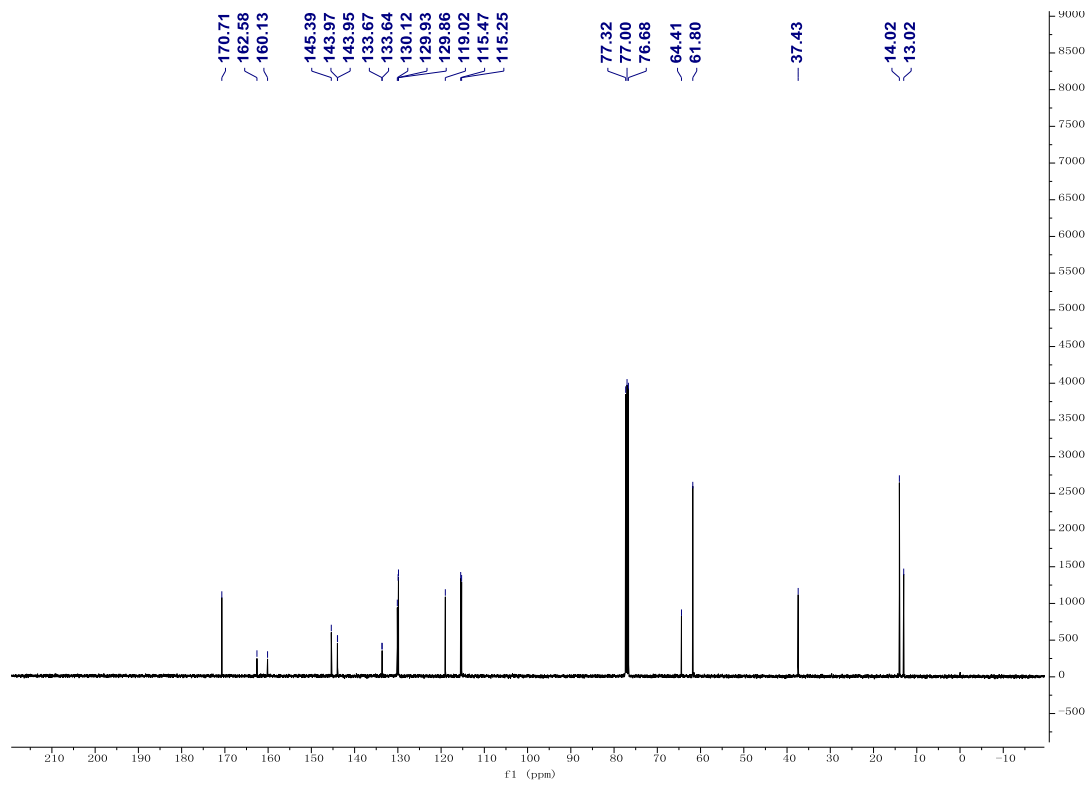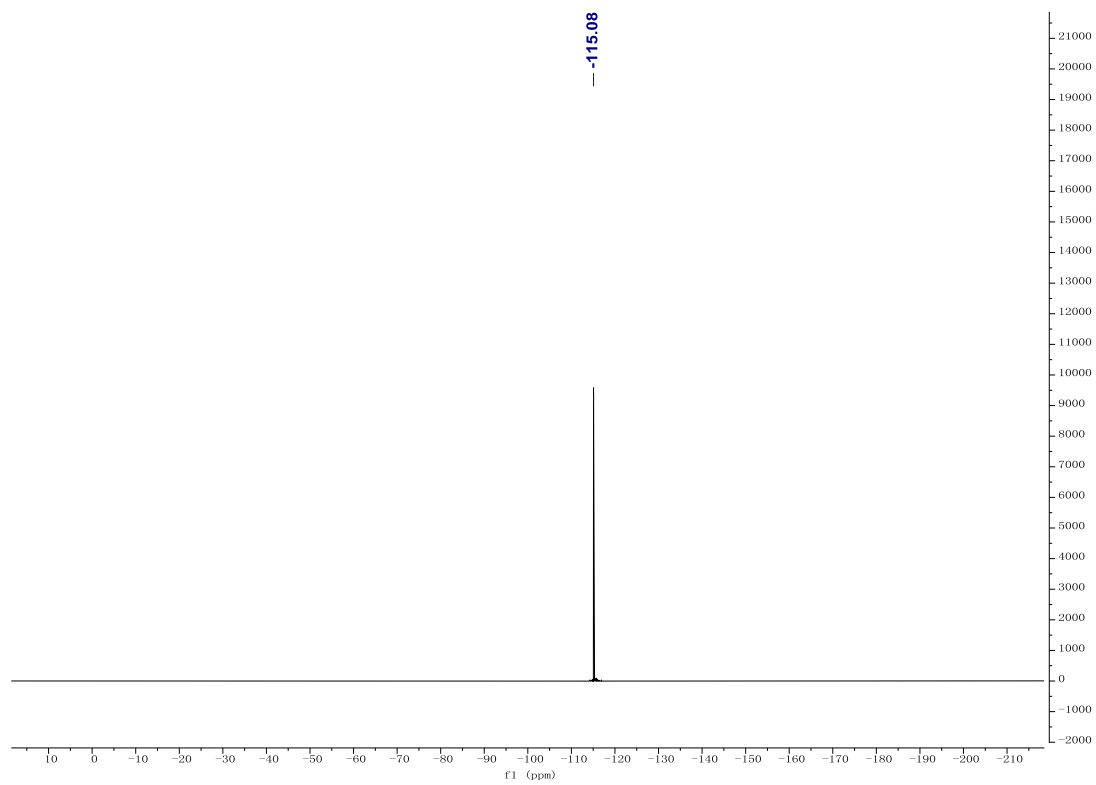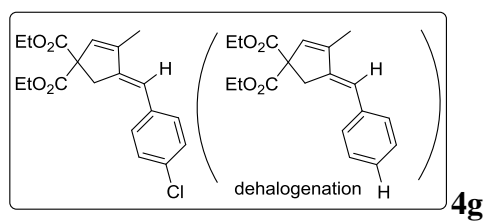

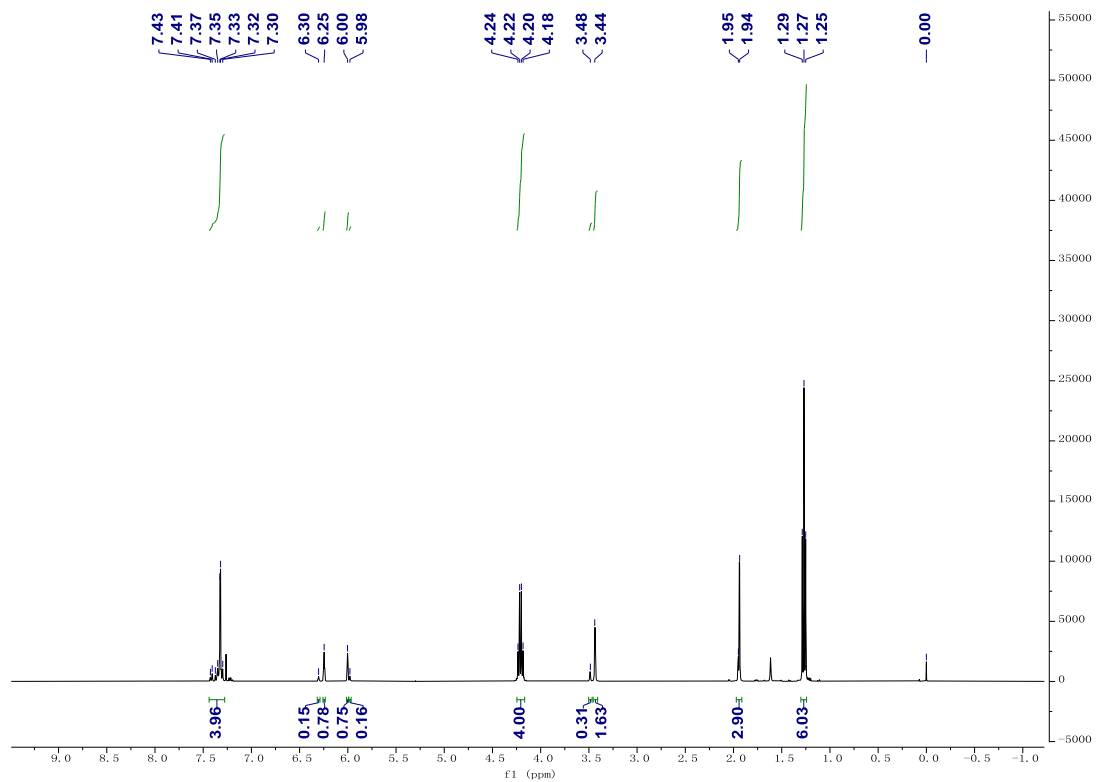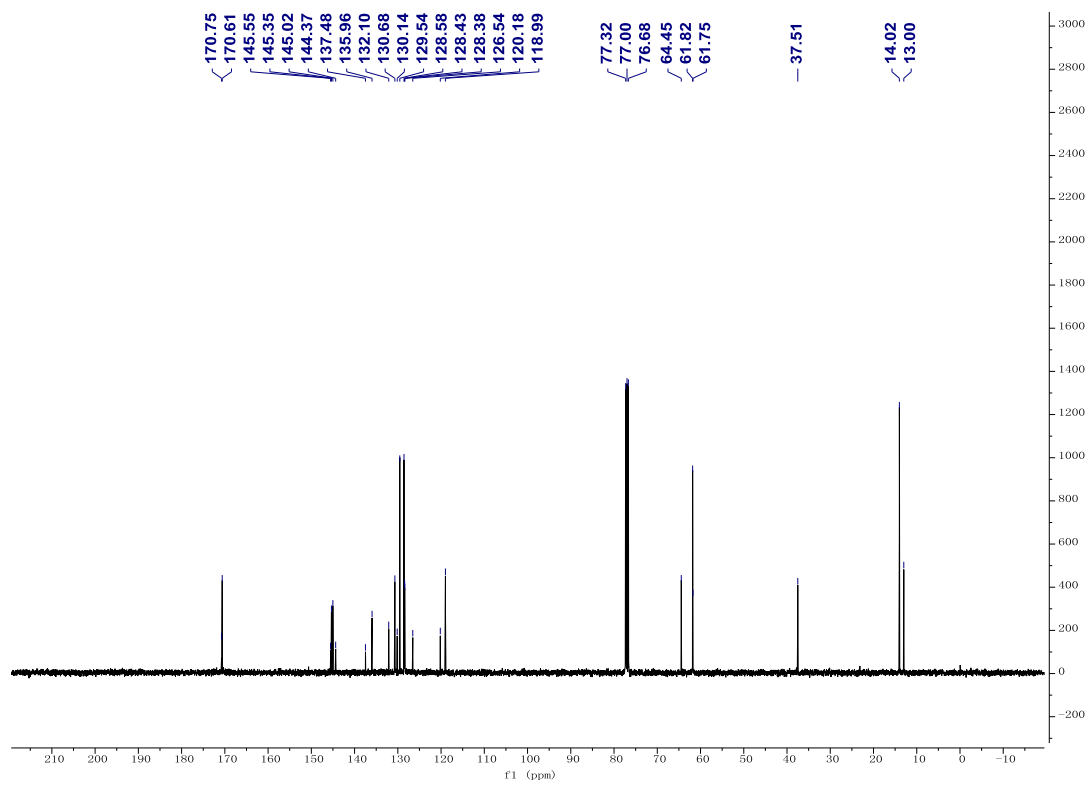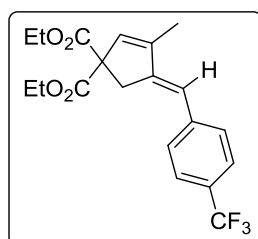

**4h**

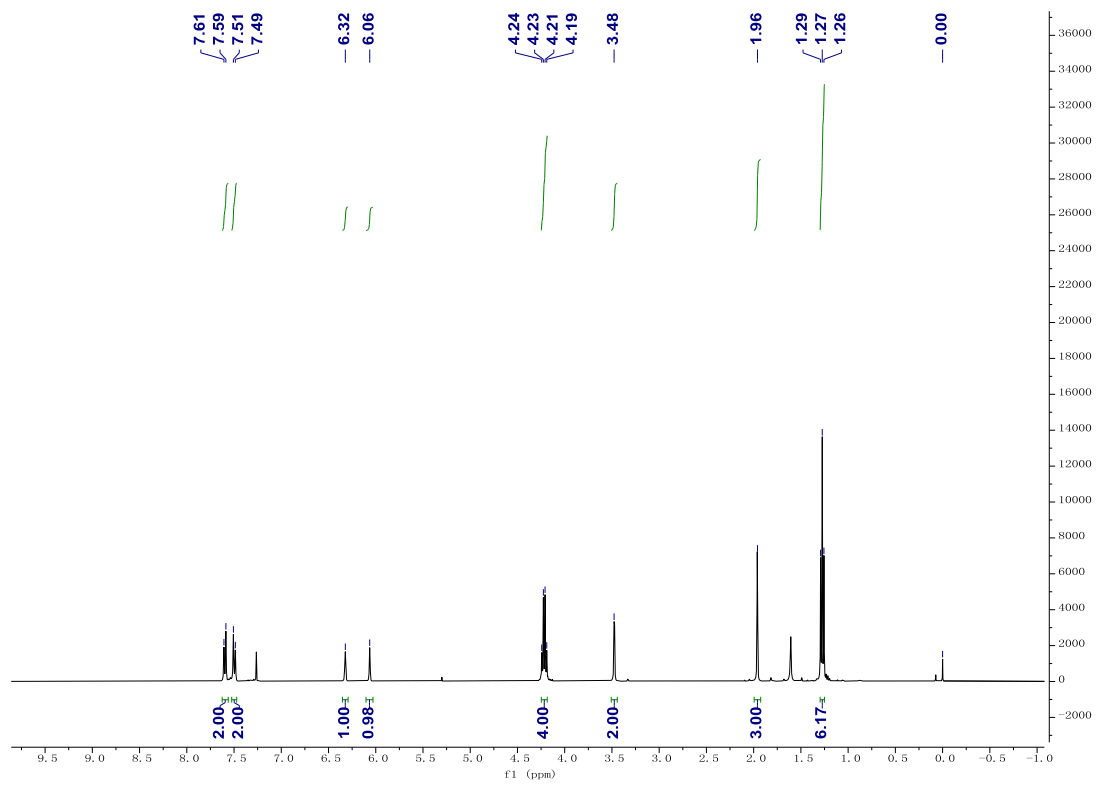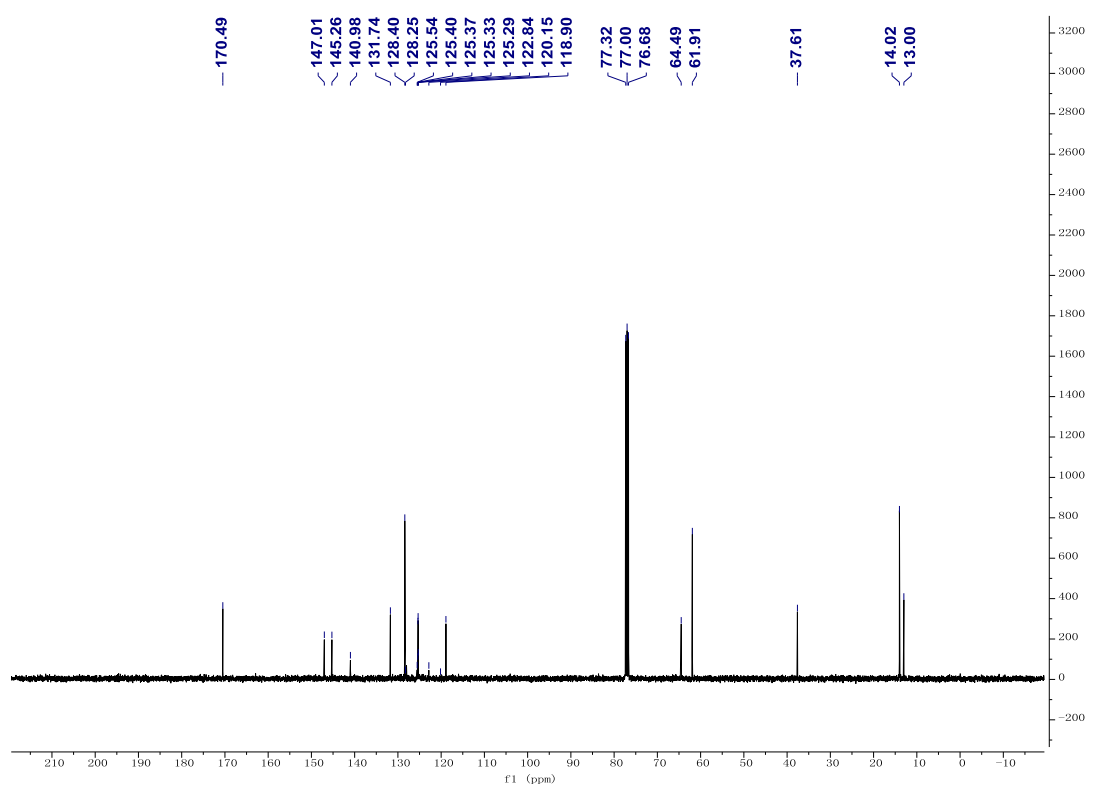

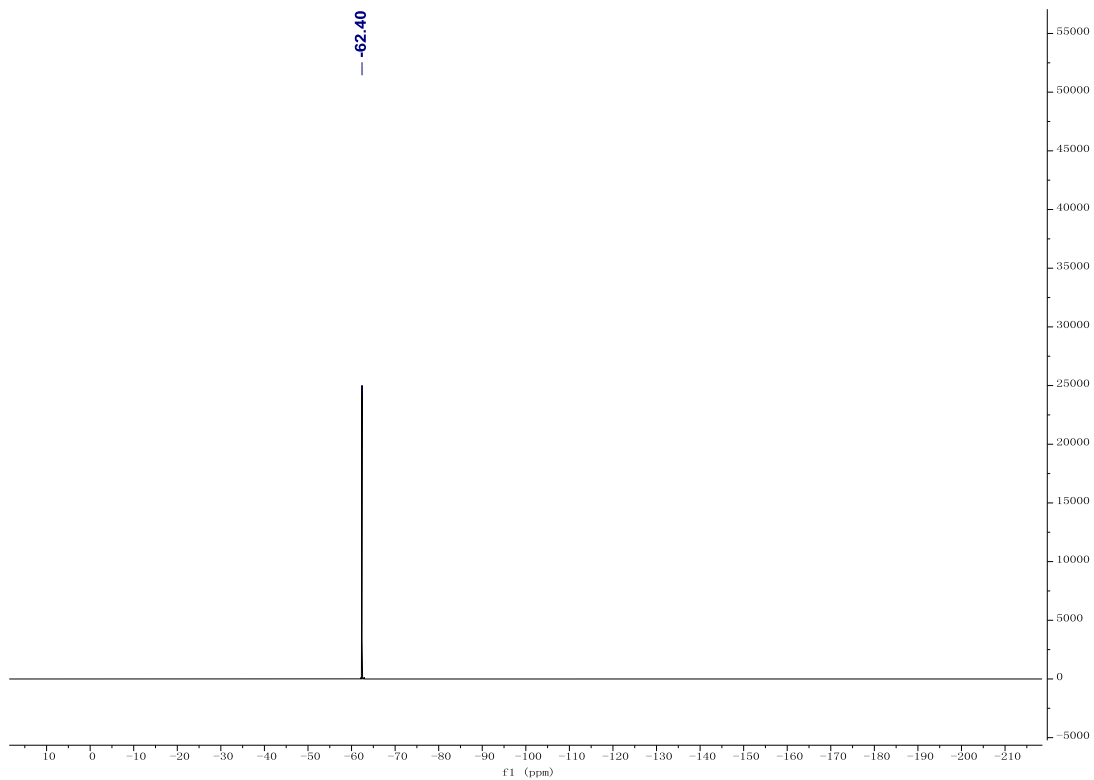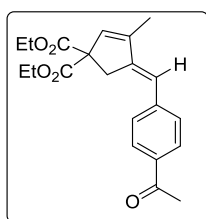

**4i**

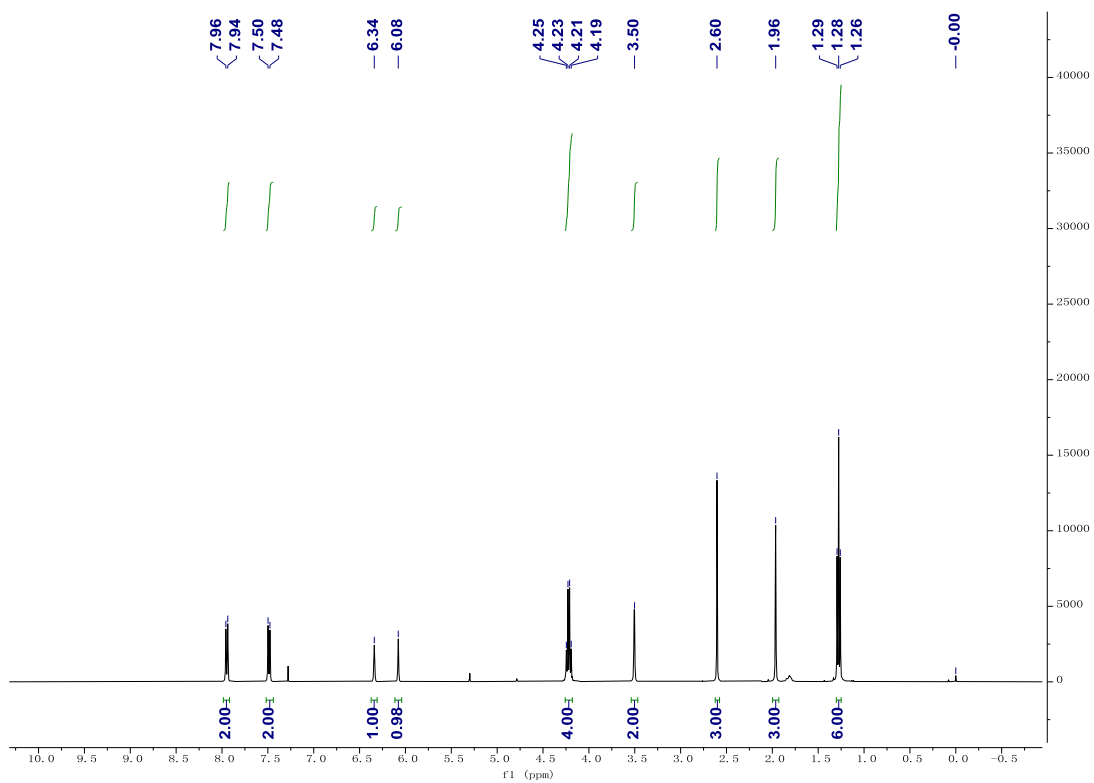

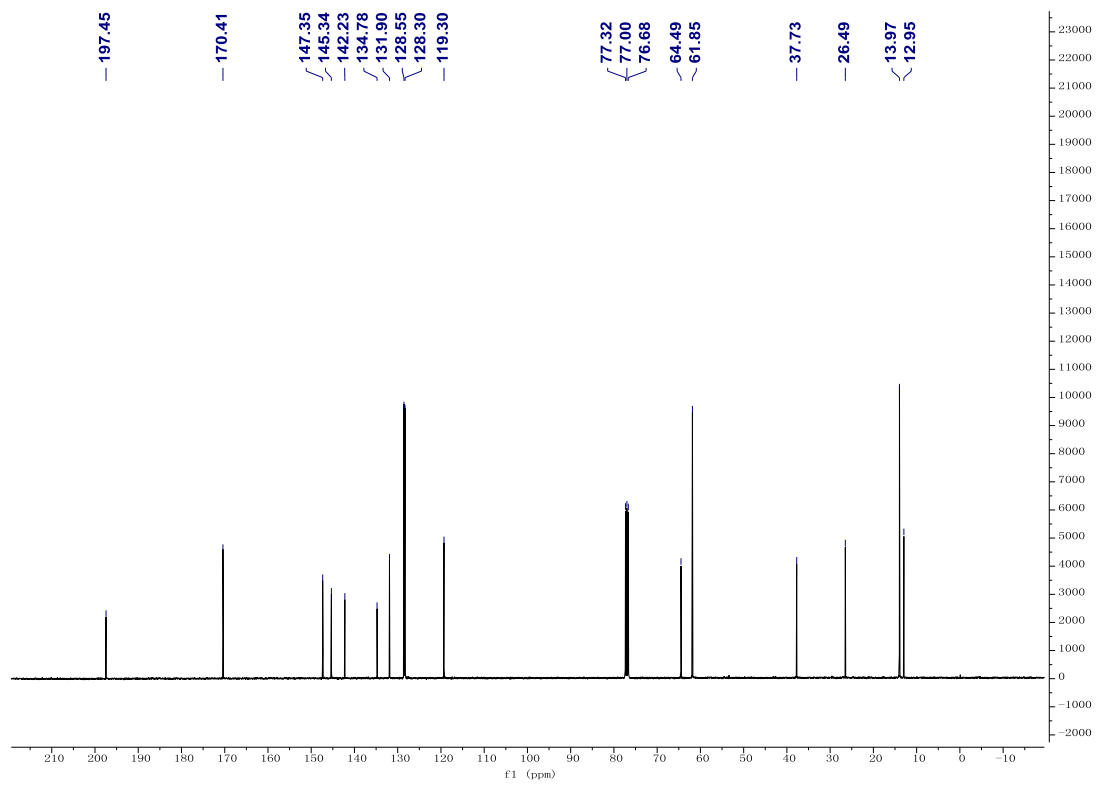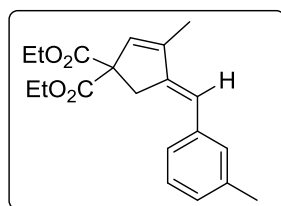

**4j**

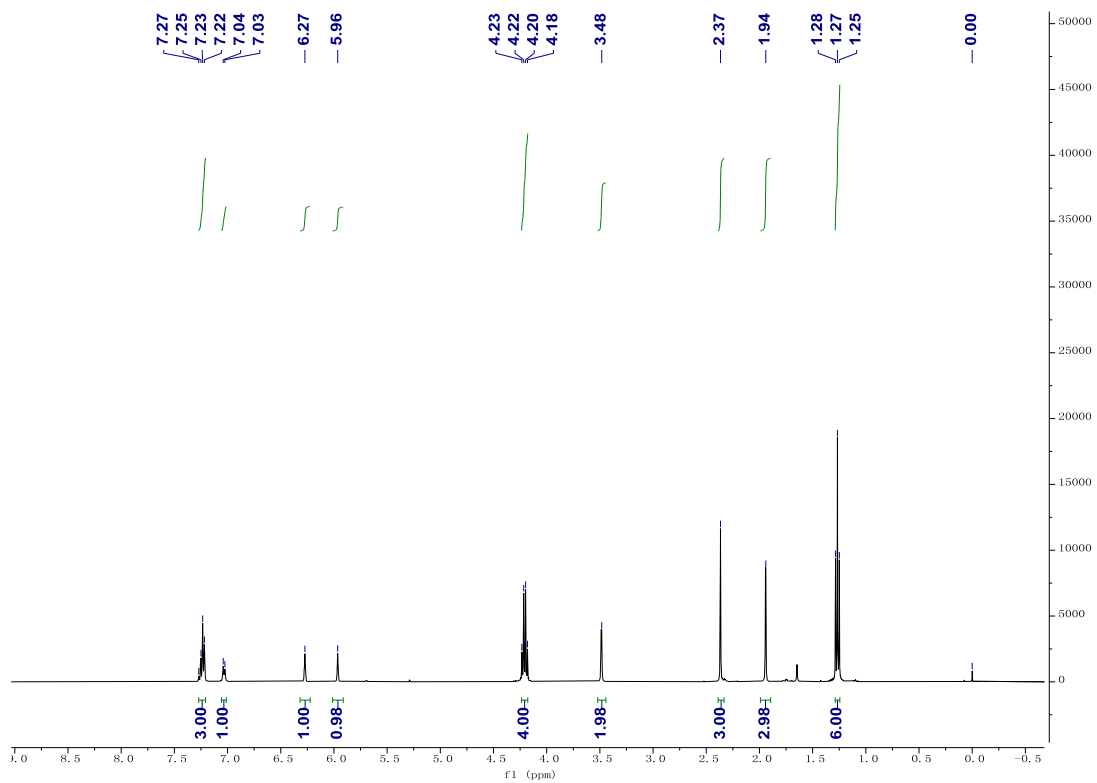

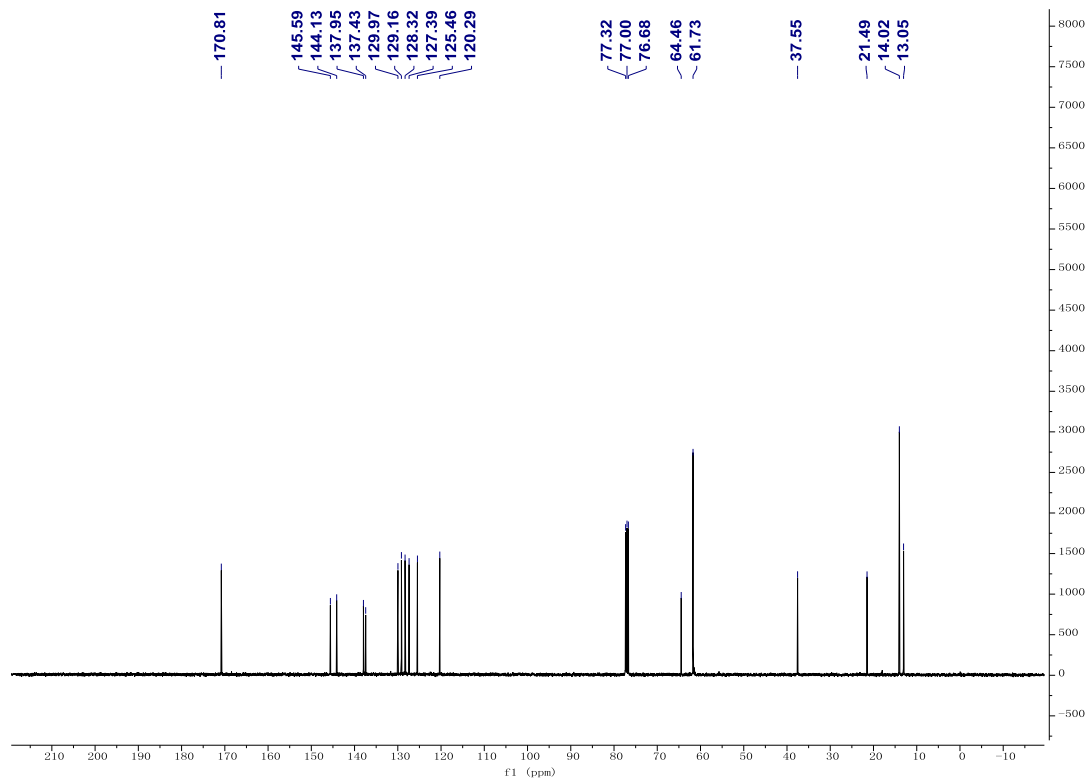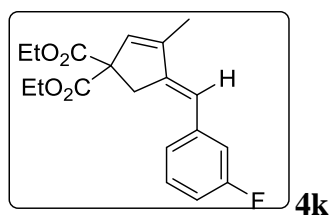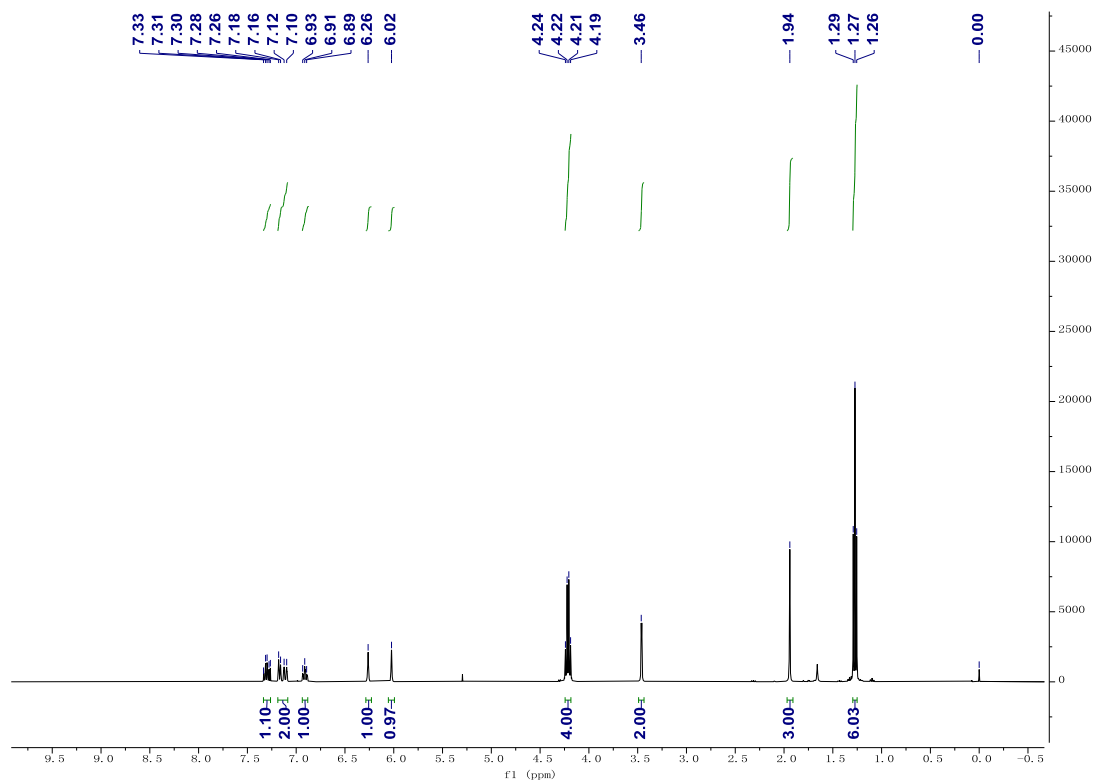

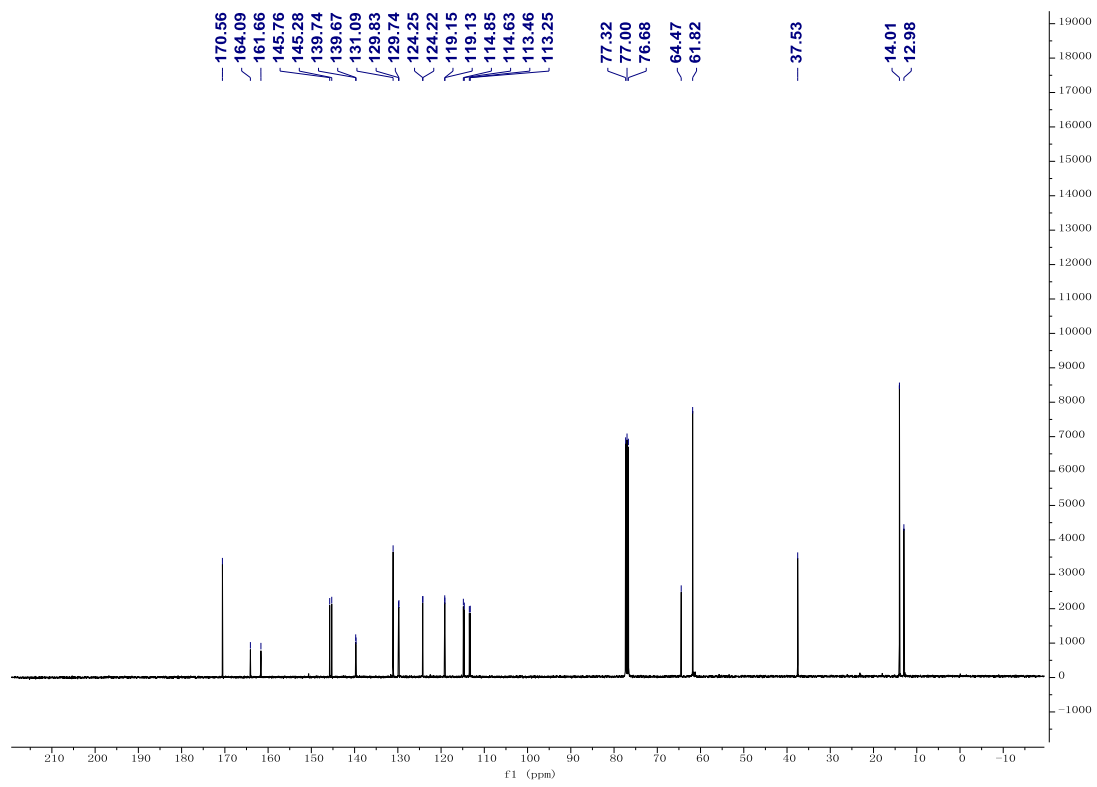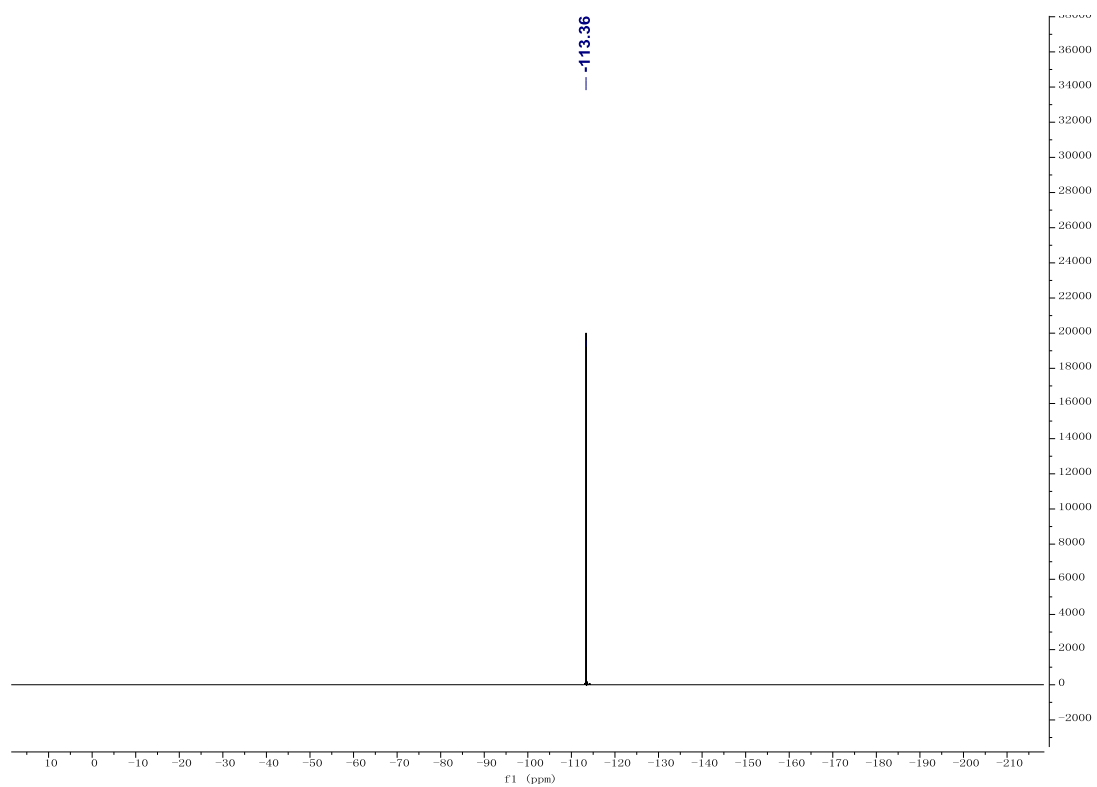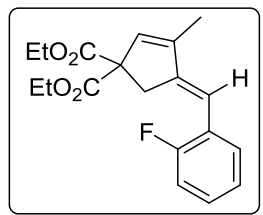

**41**

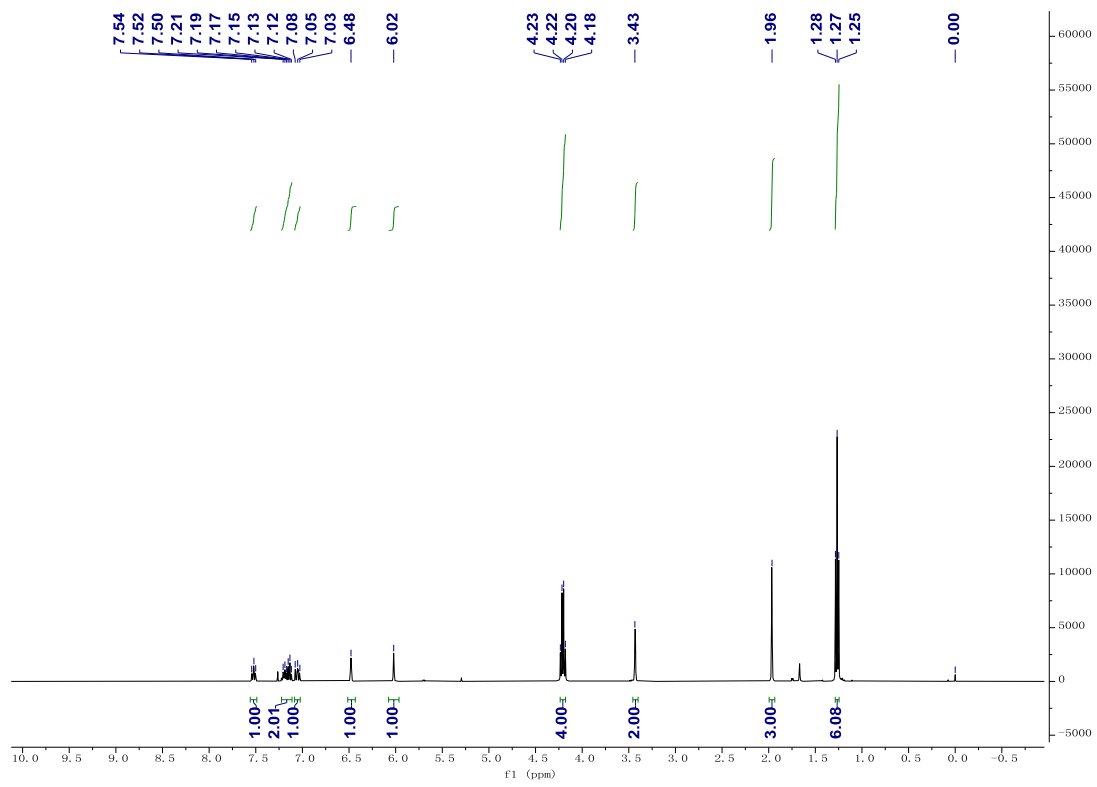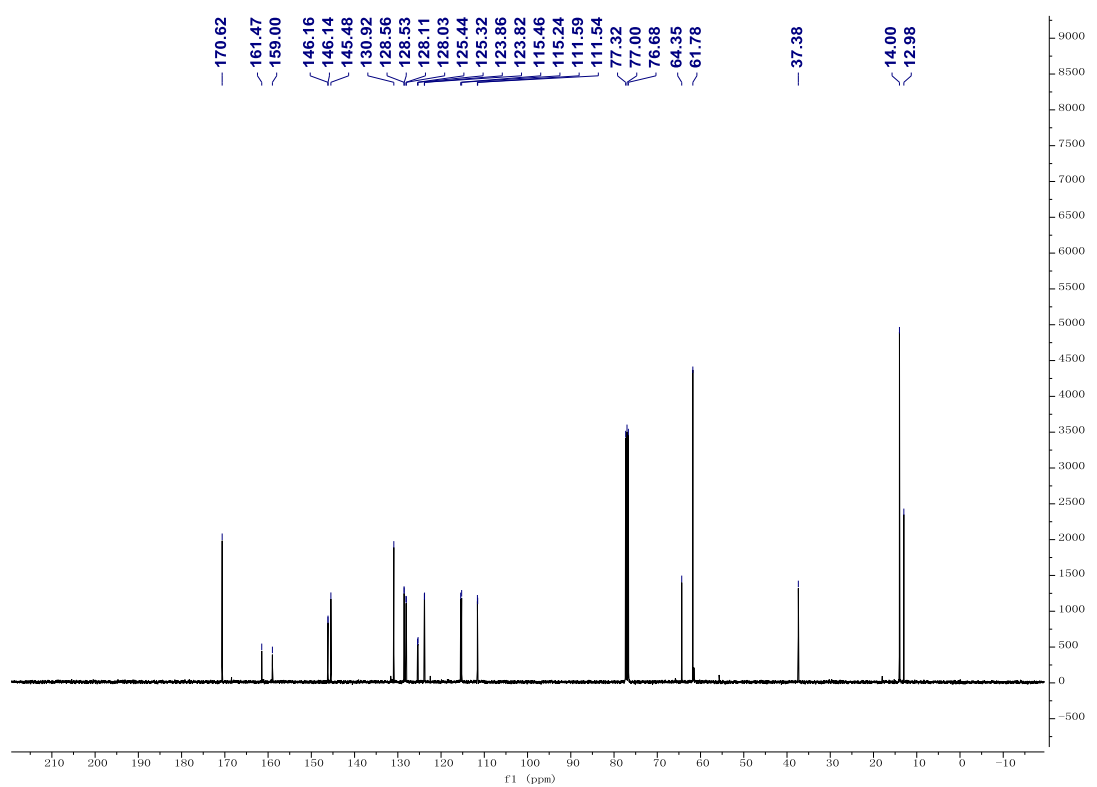



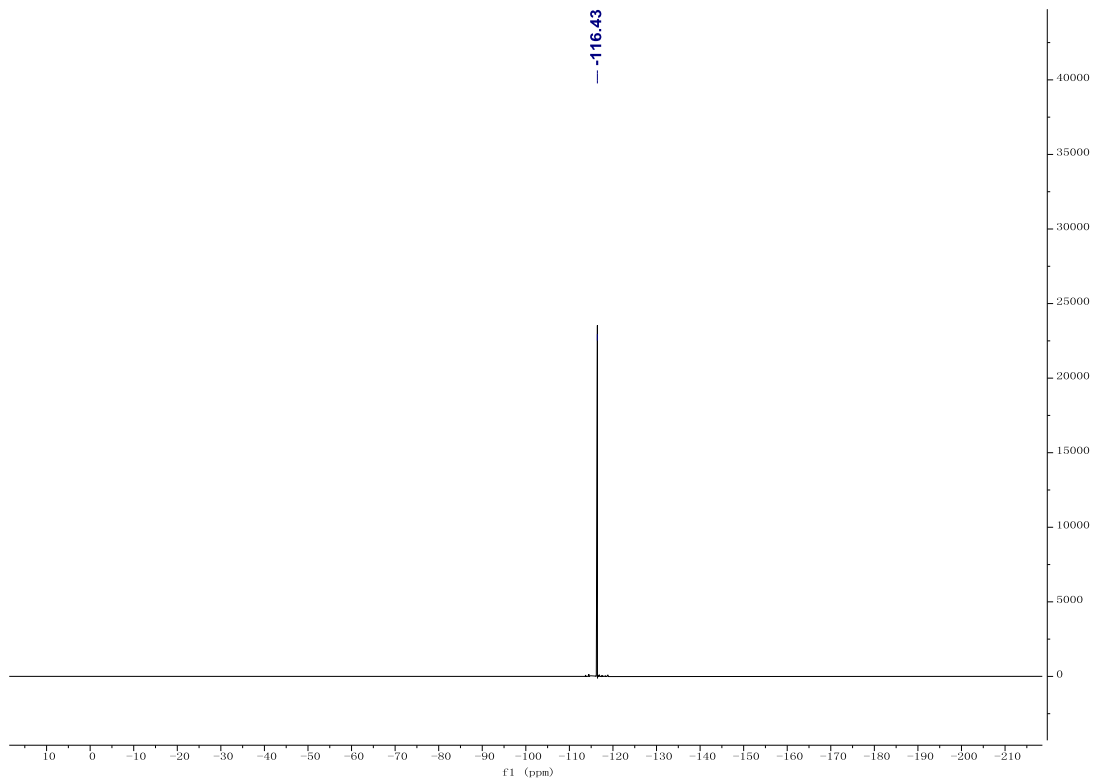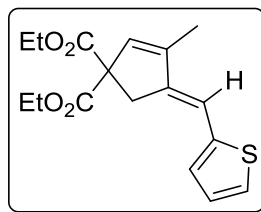

**4m**

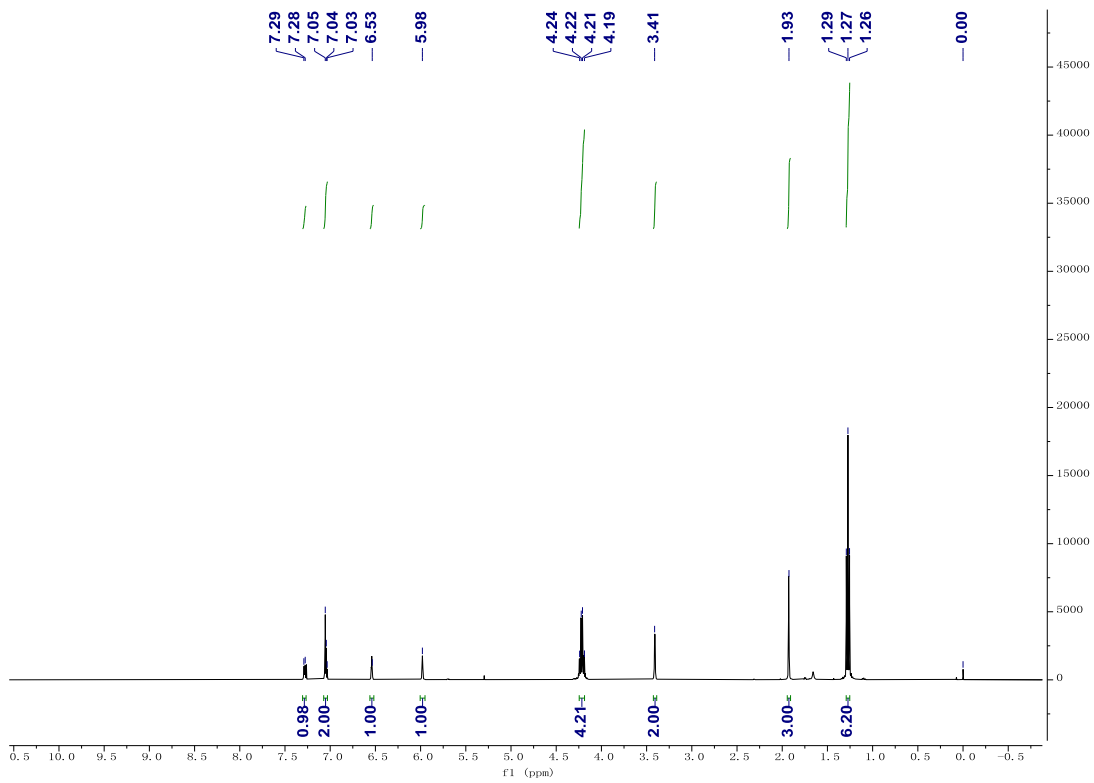

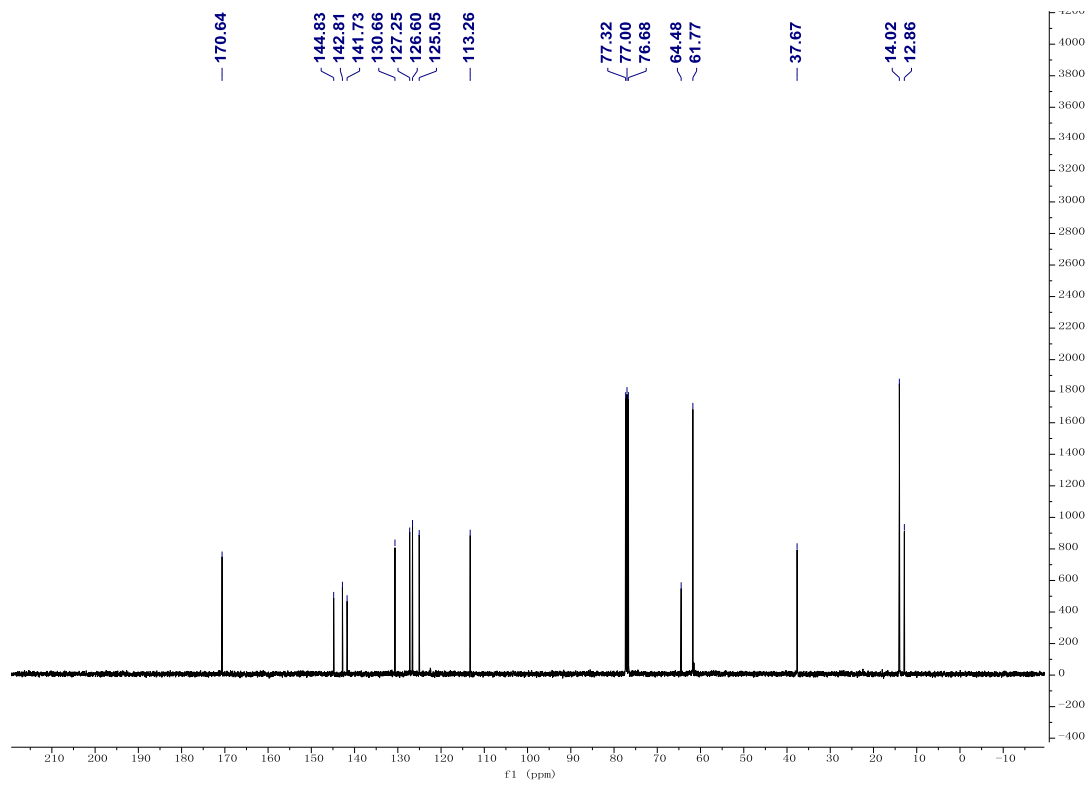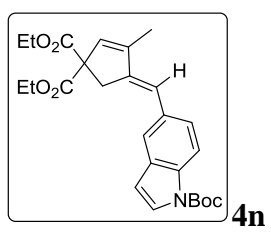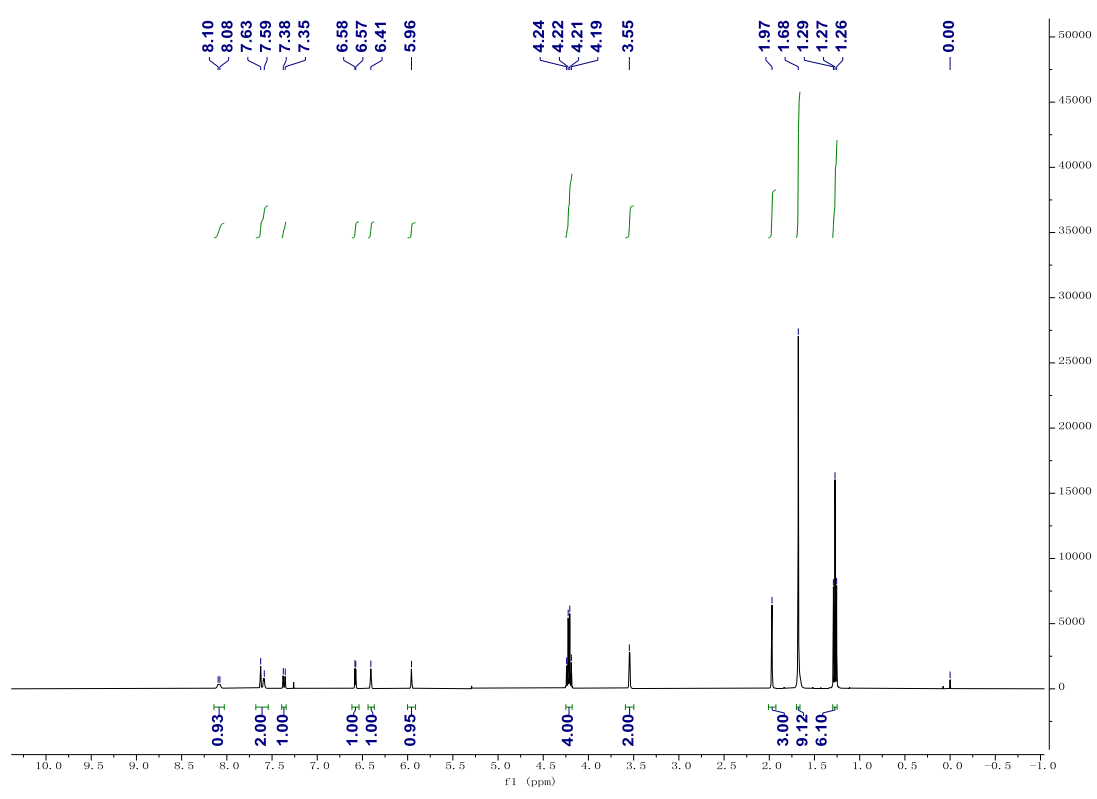

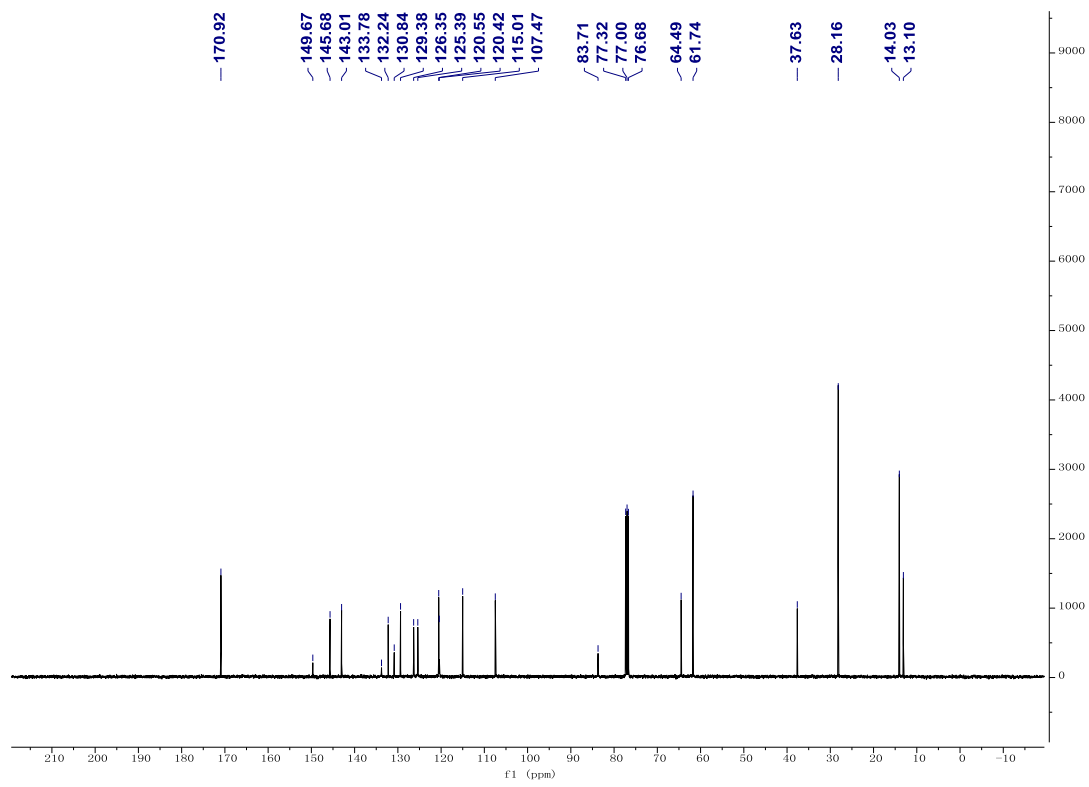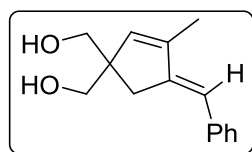

8

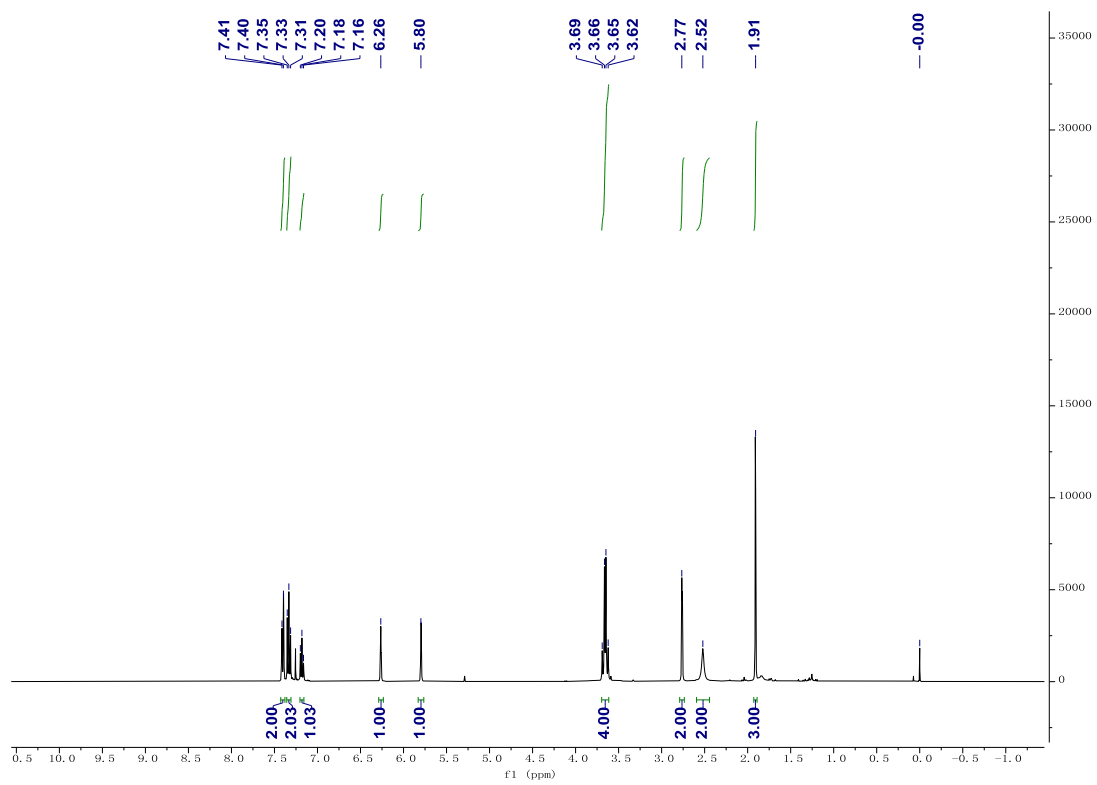

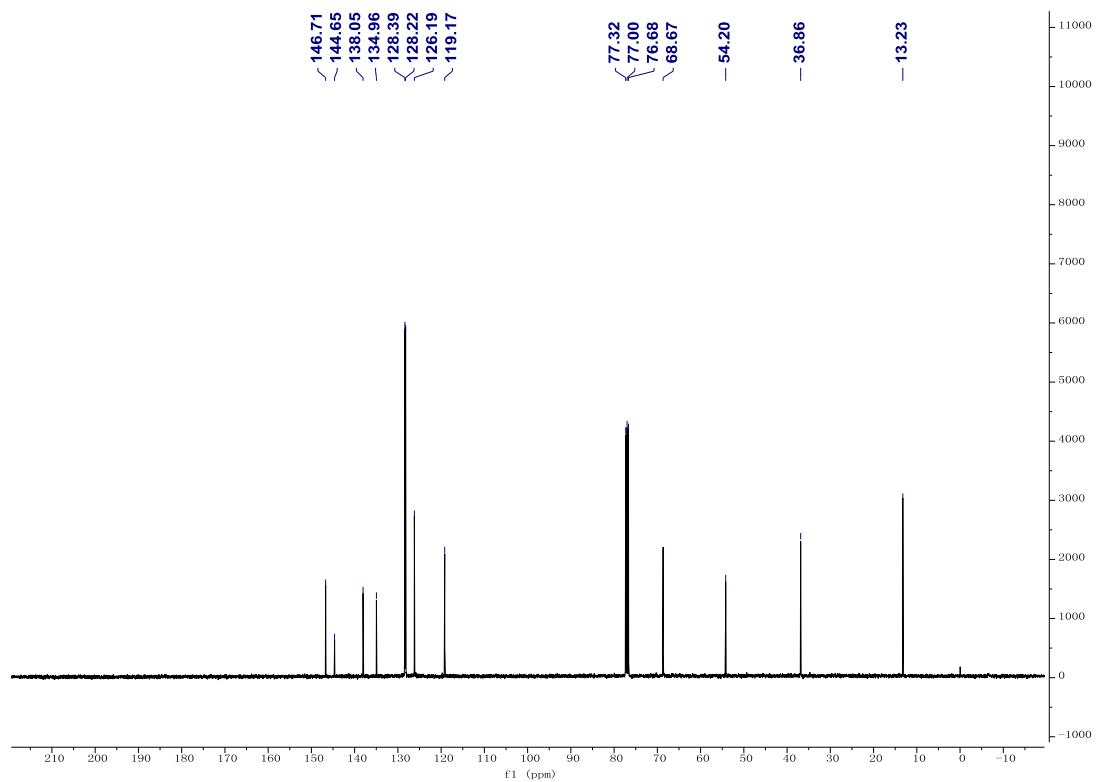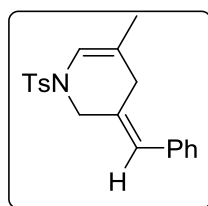

**(E)-6a**

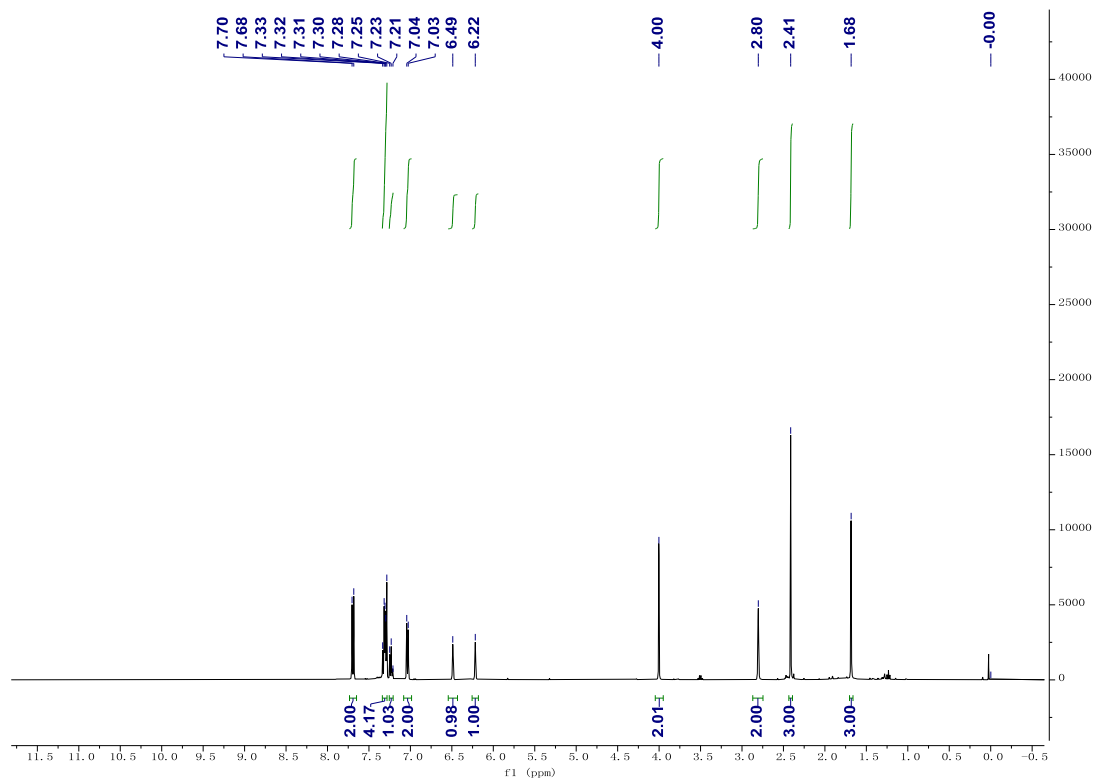

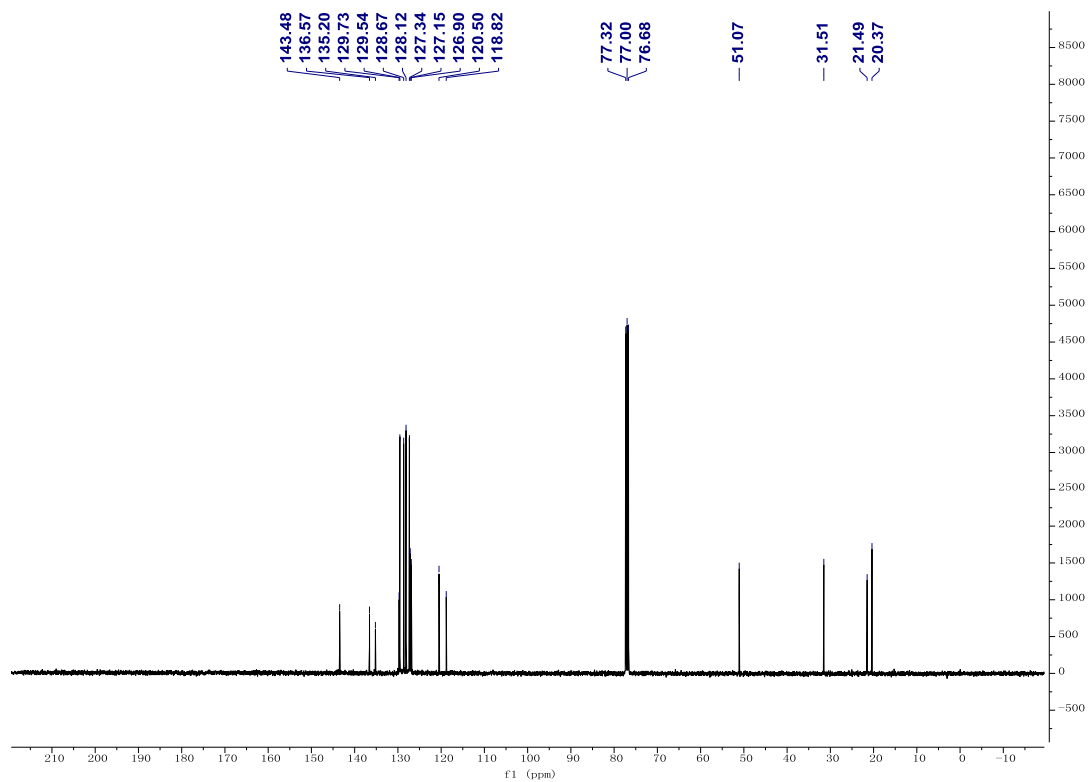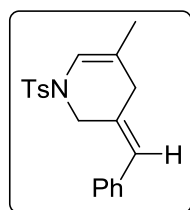

**(Z)-6a**

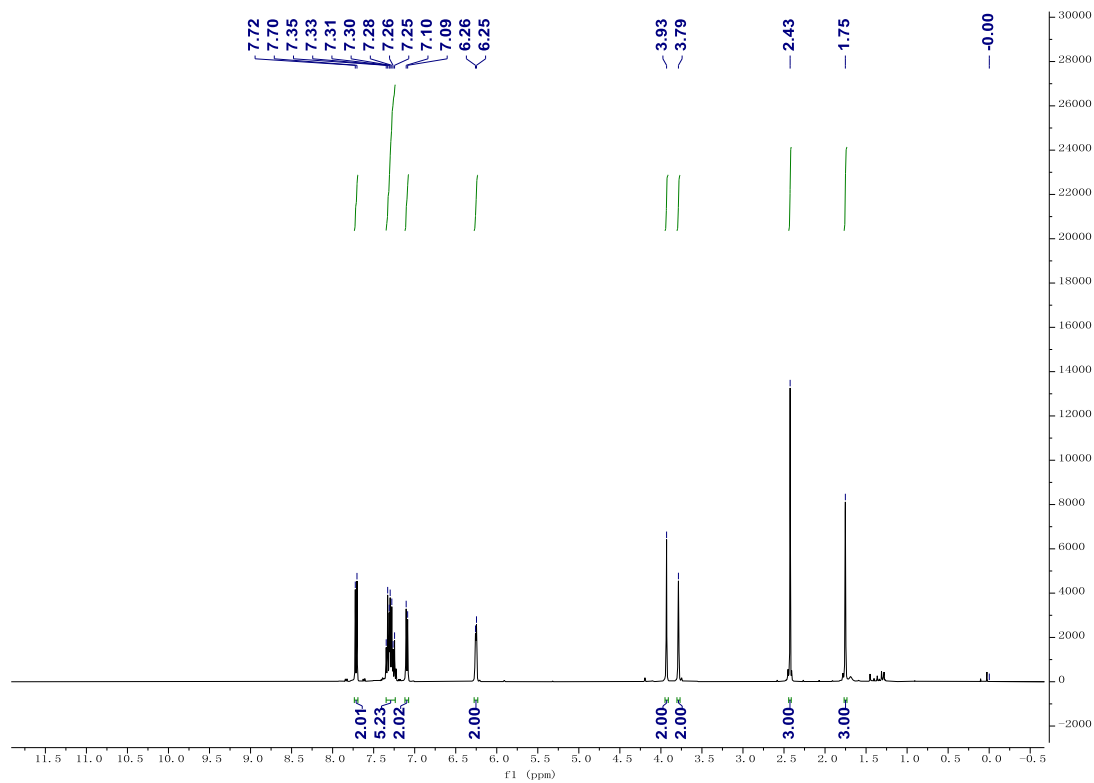

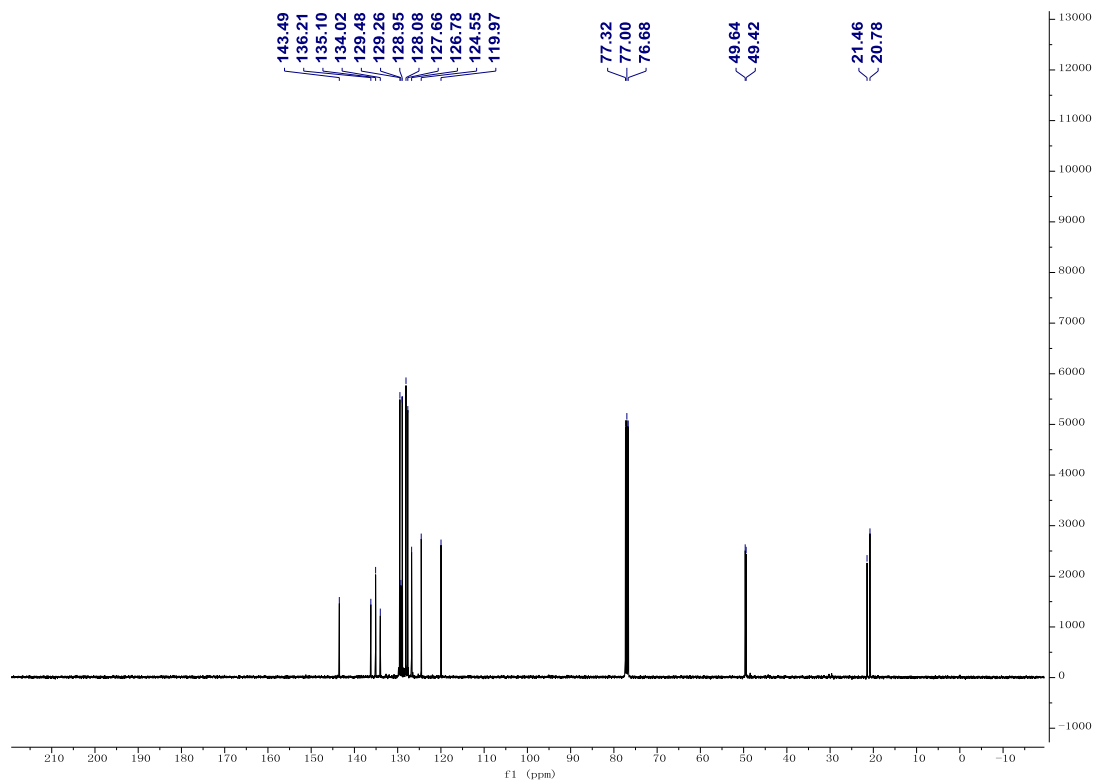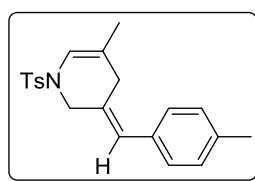

**(E)-6b**

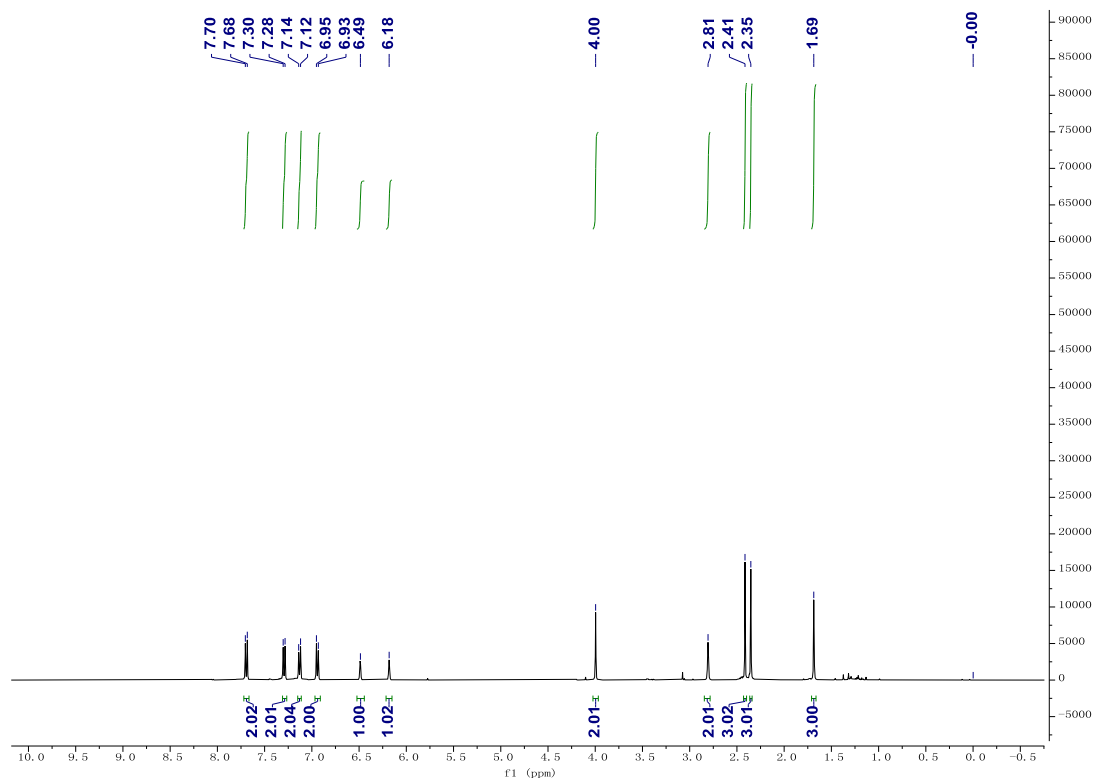

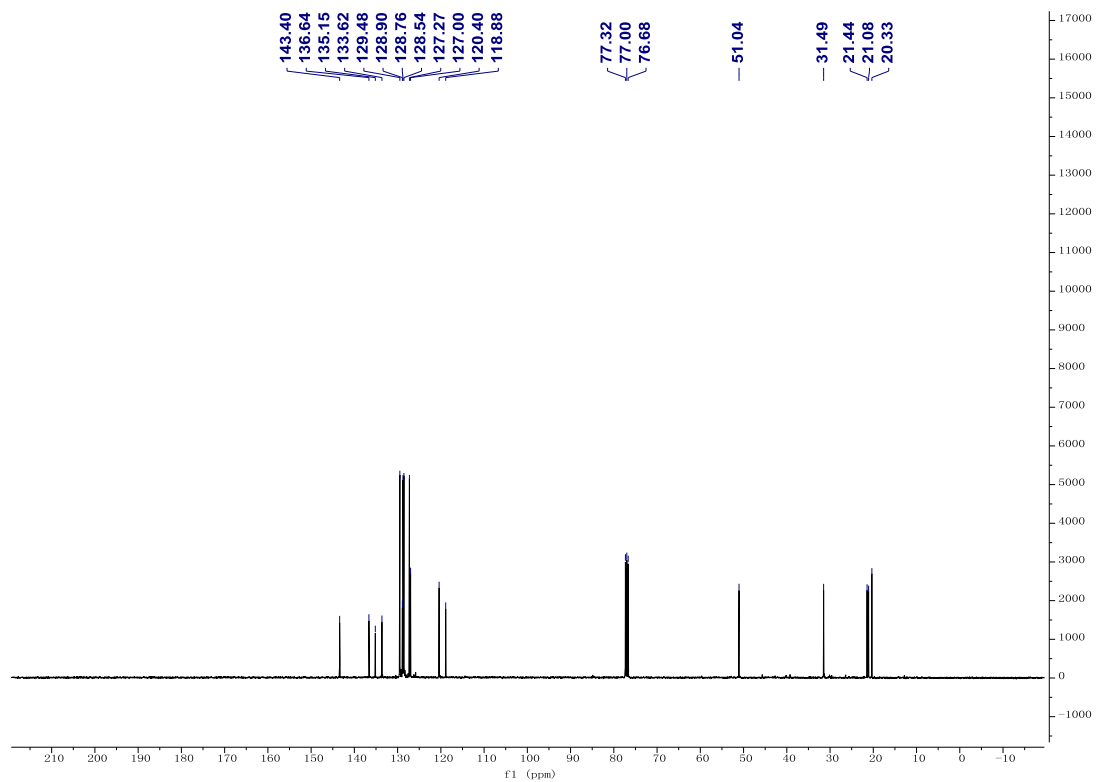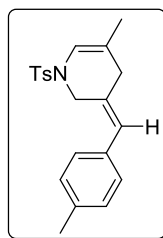

**(Z)-6b**

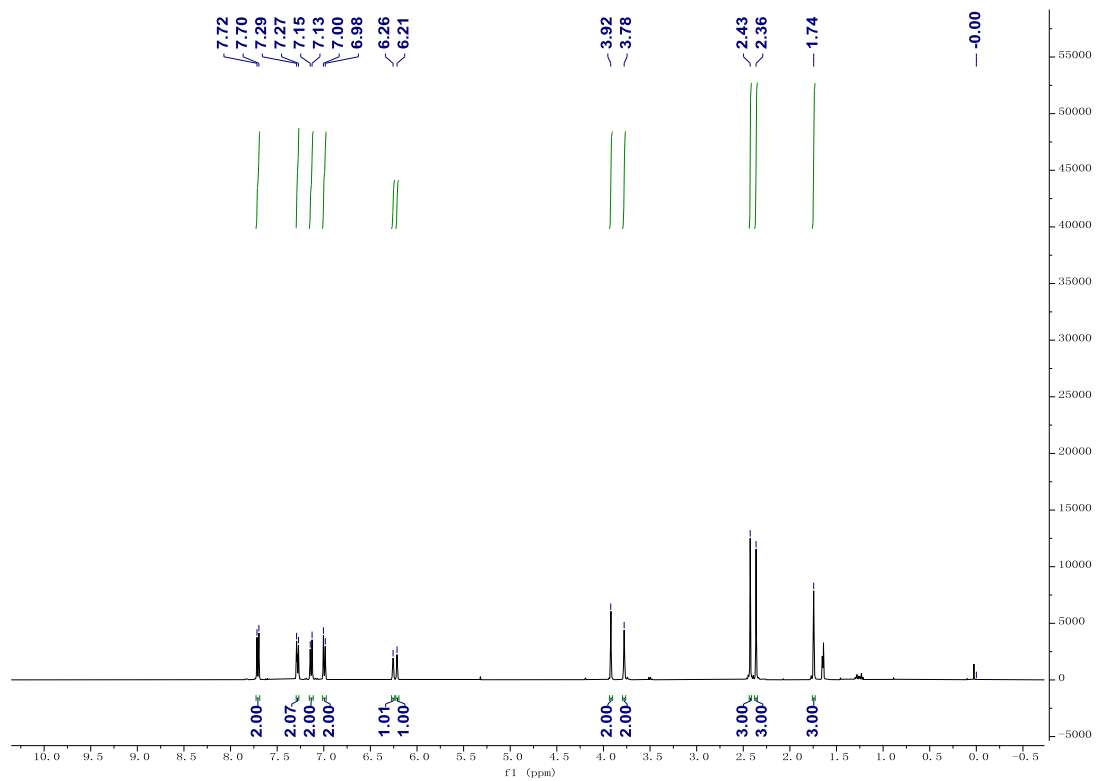

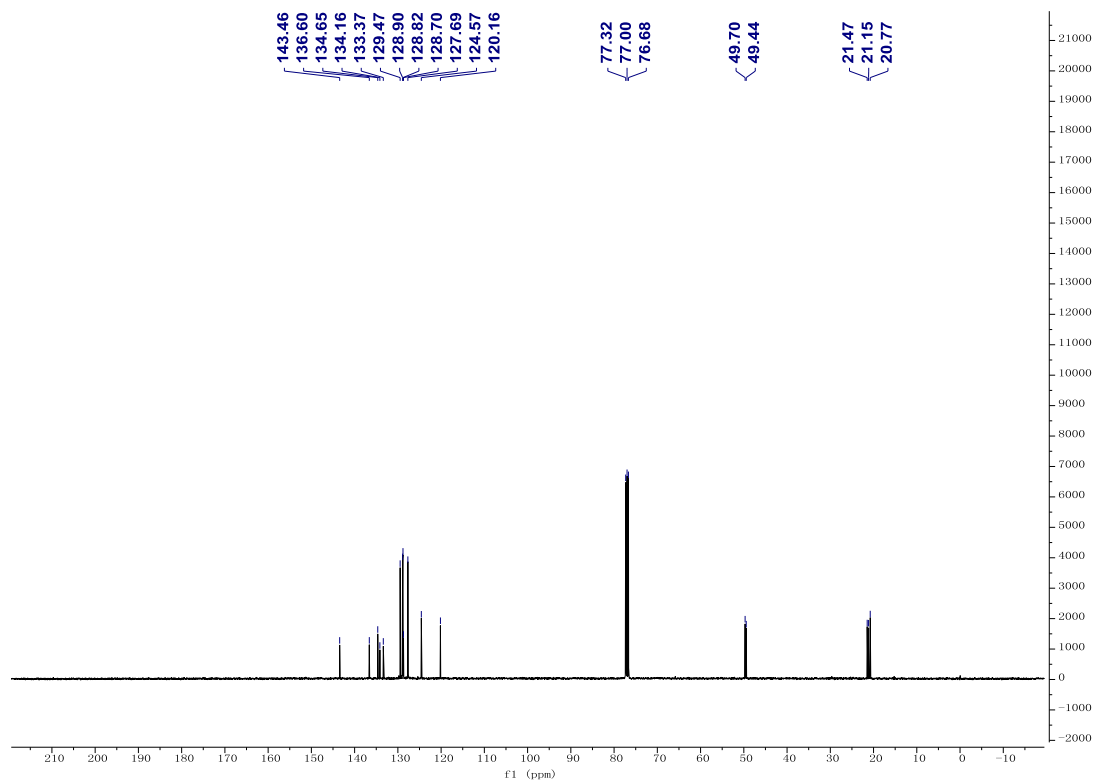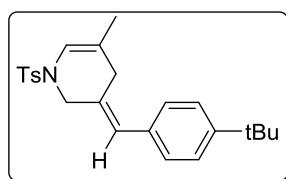

**(E)-6c**

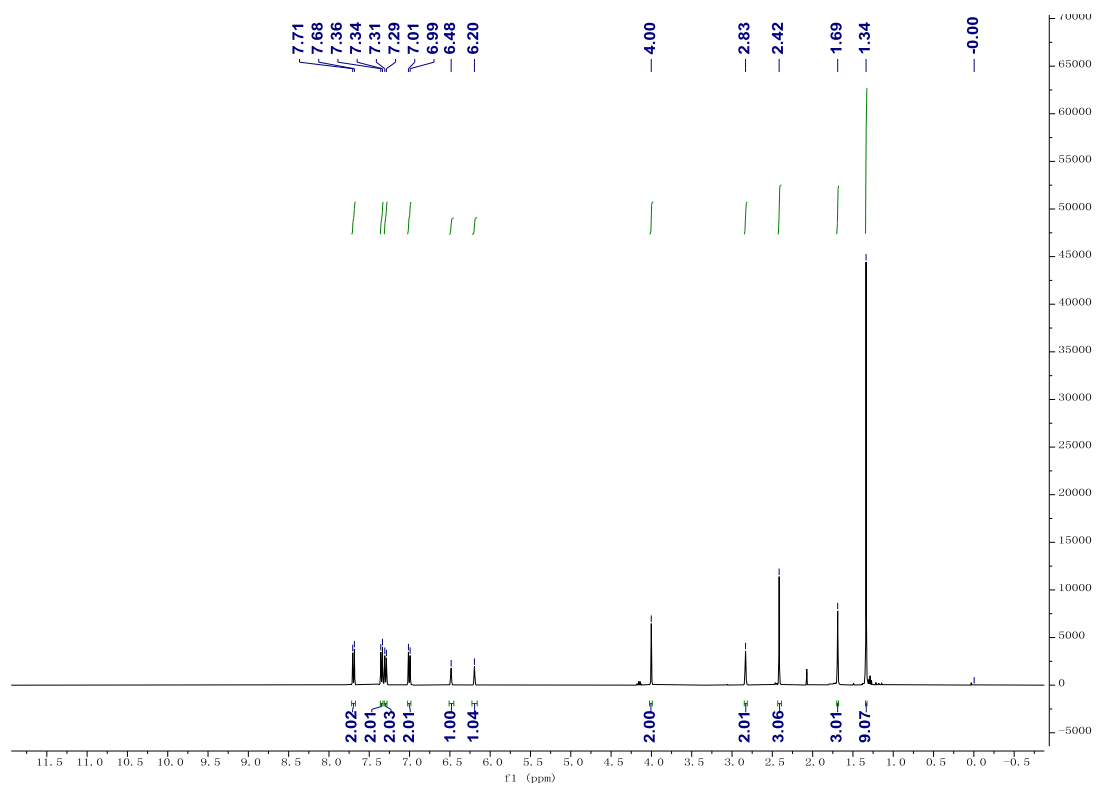



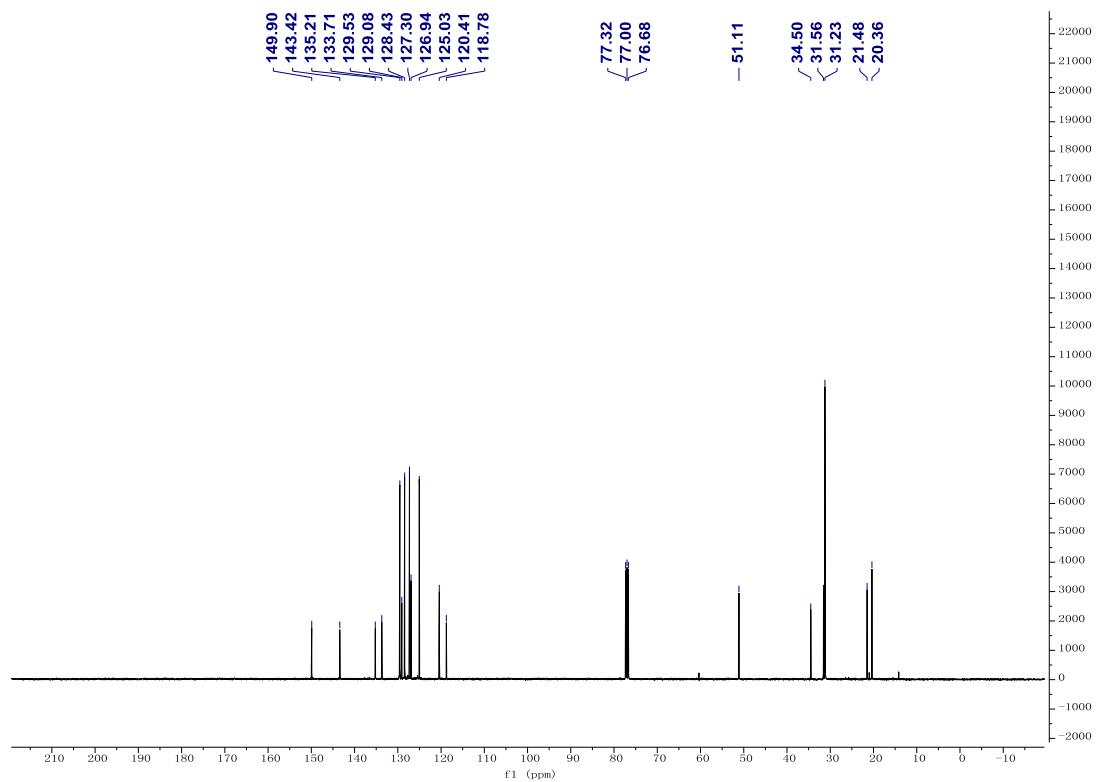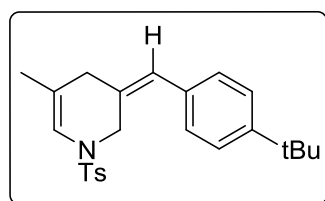

(Z)-6c

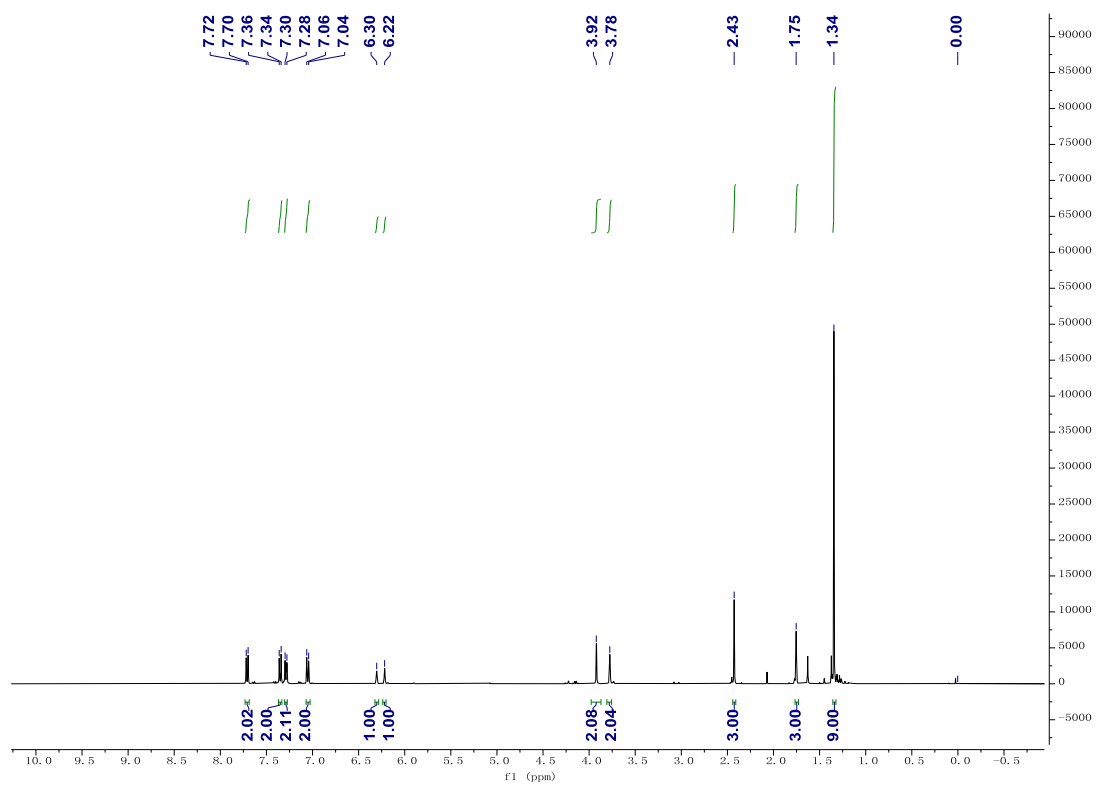

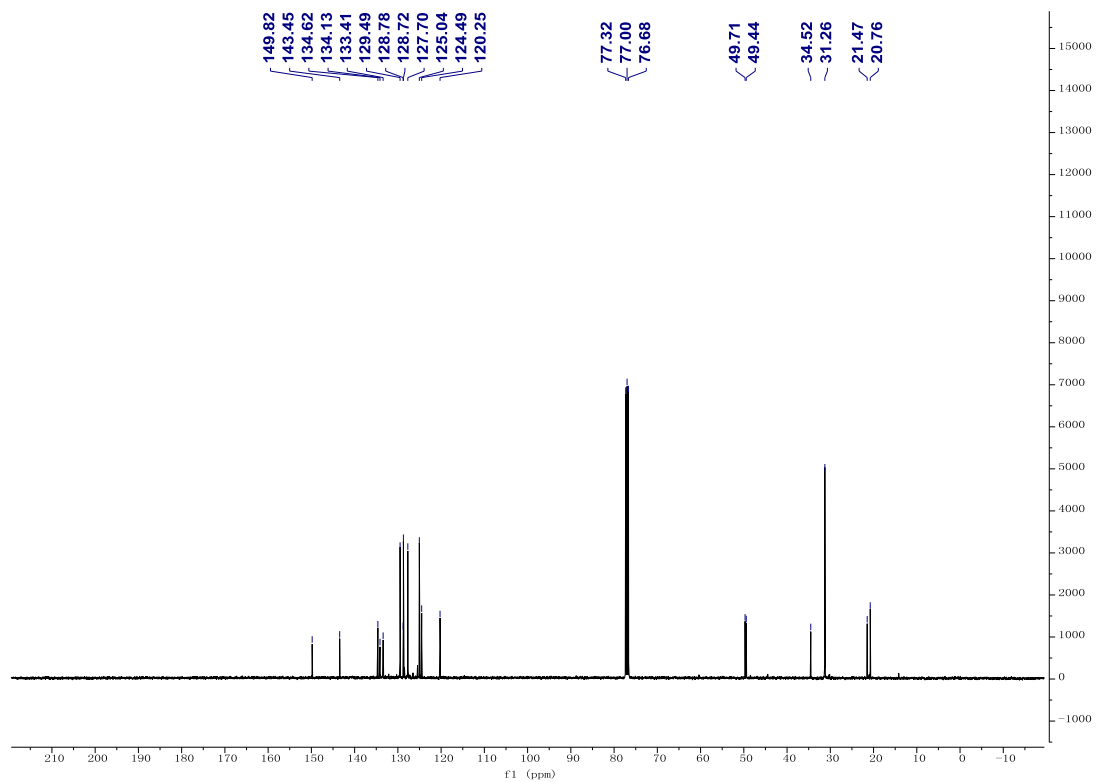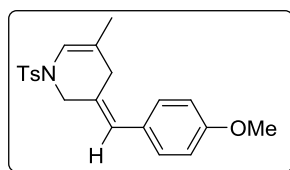

**(E)-6d**

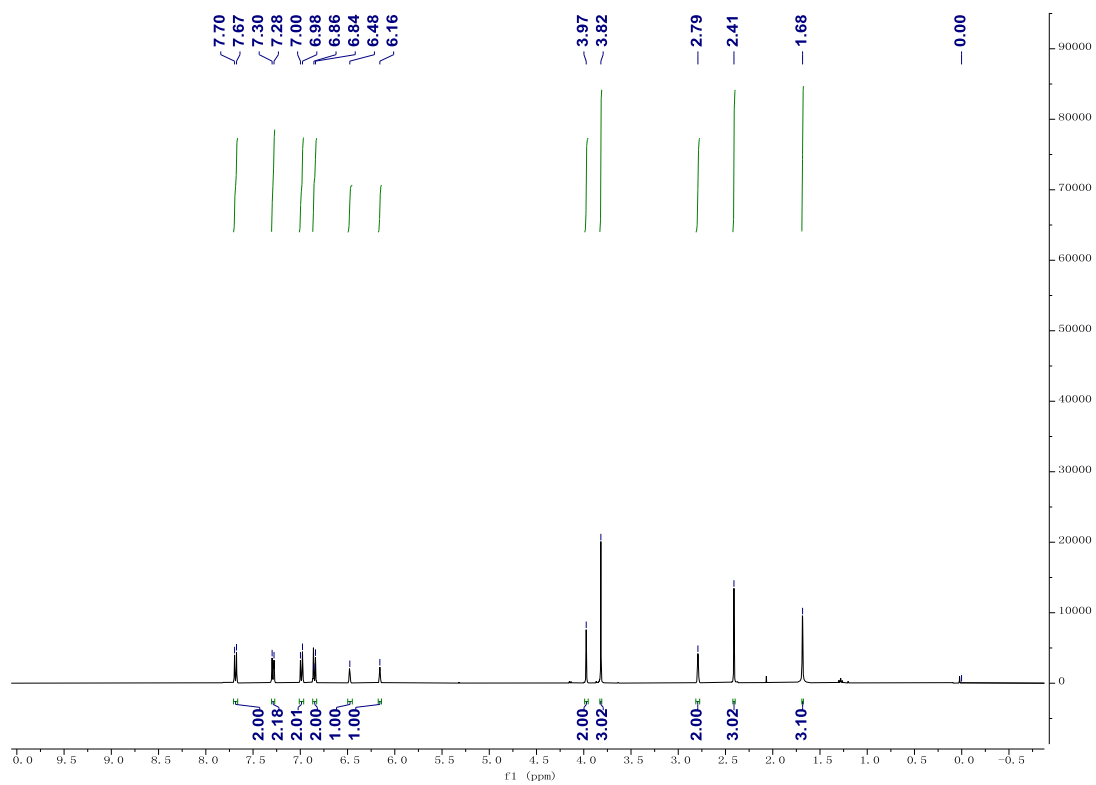

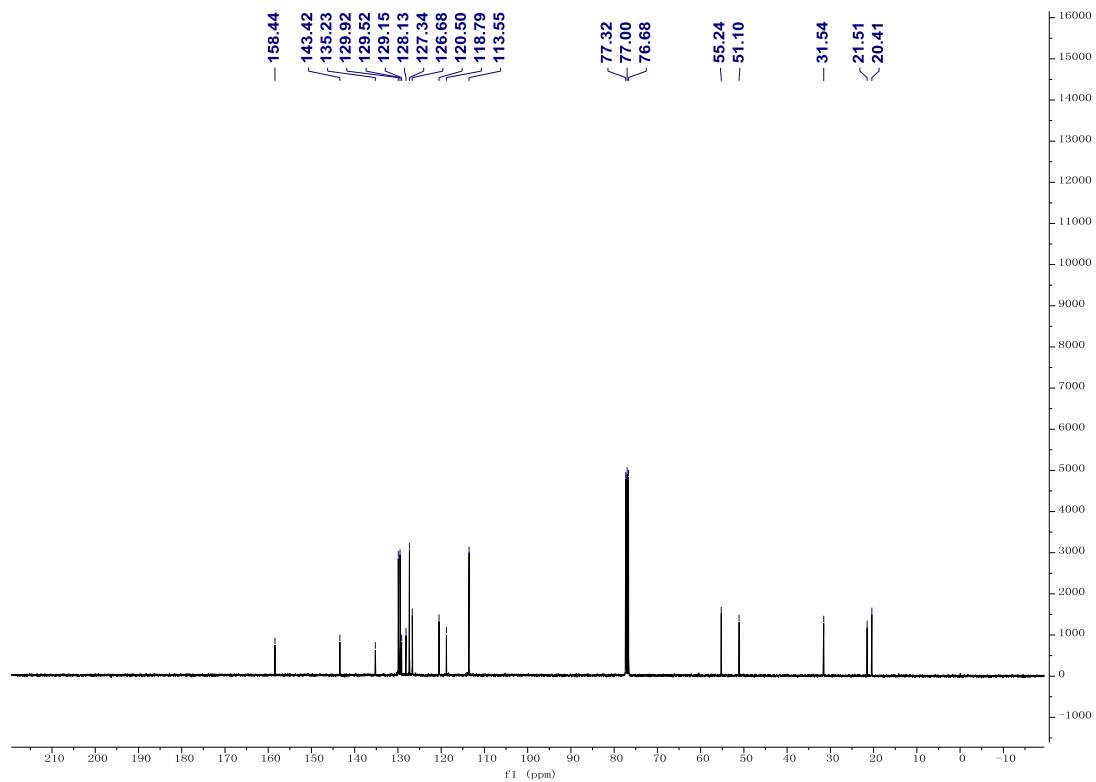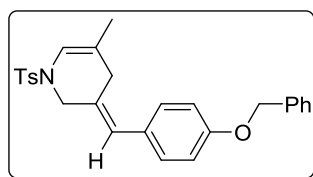

**(E)-6e**

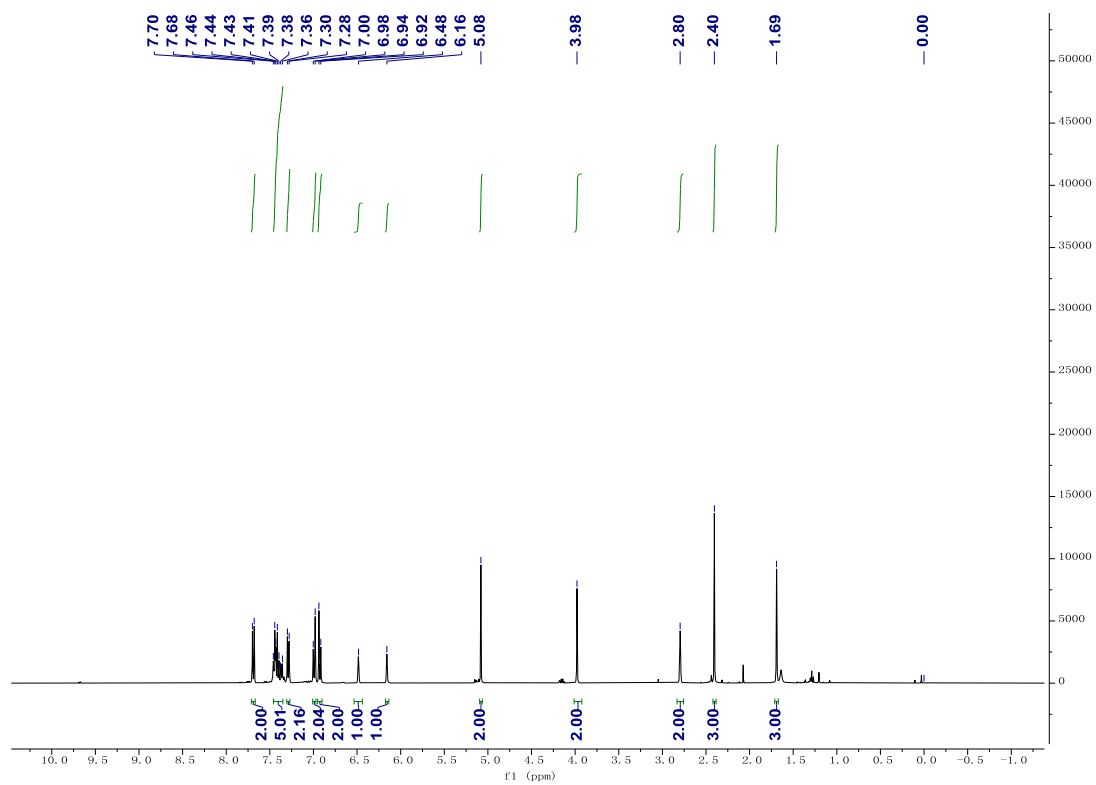

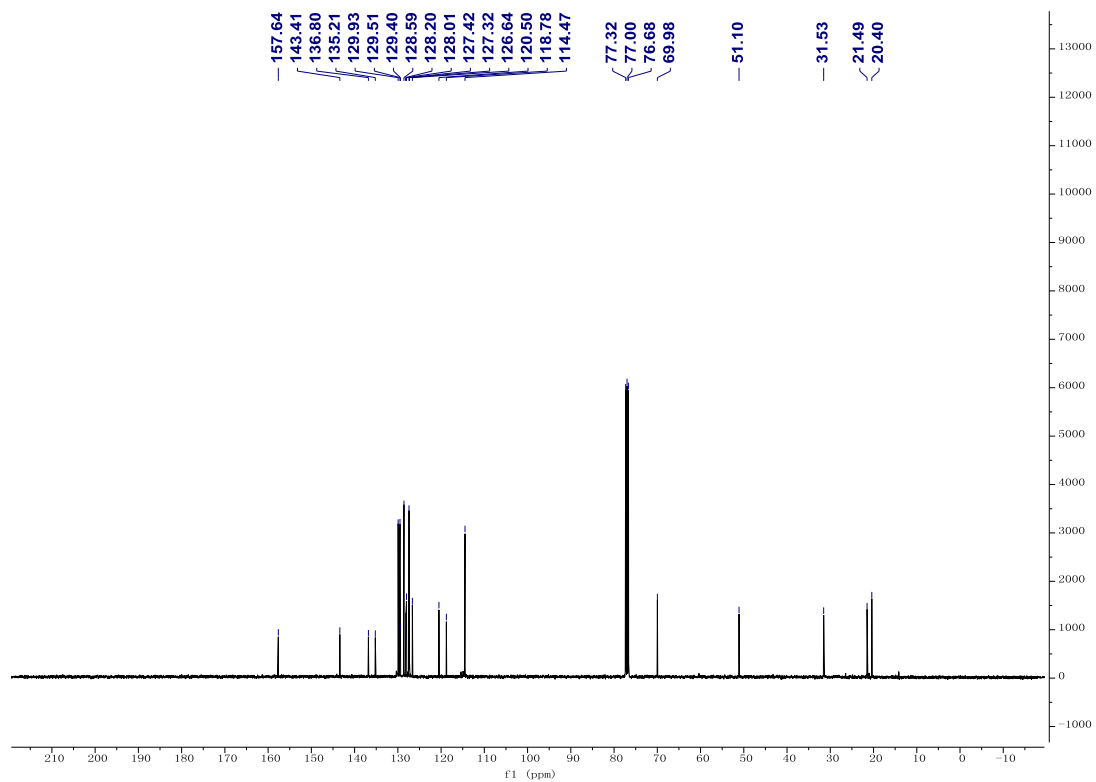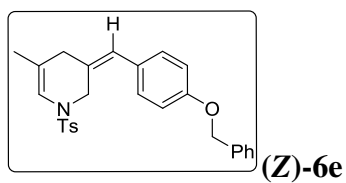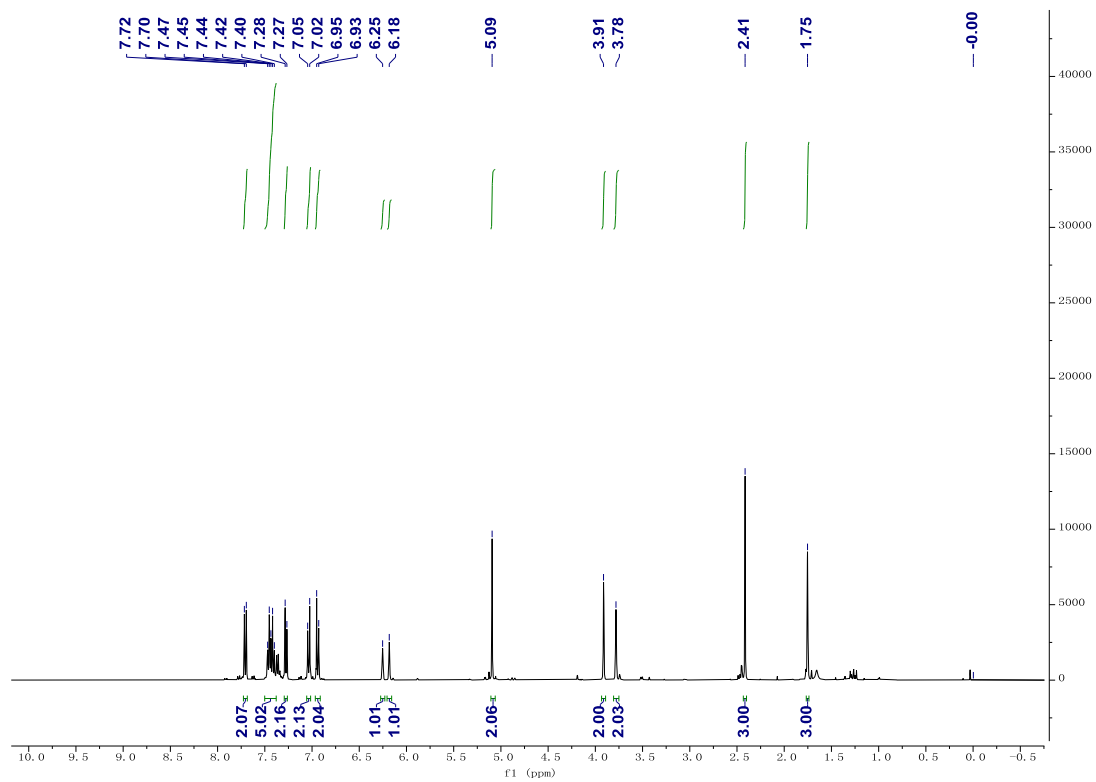

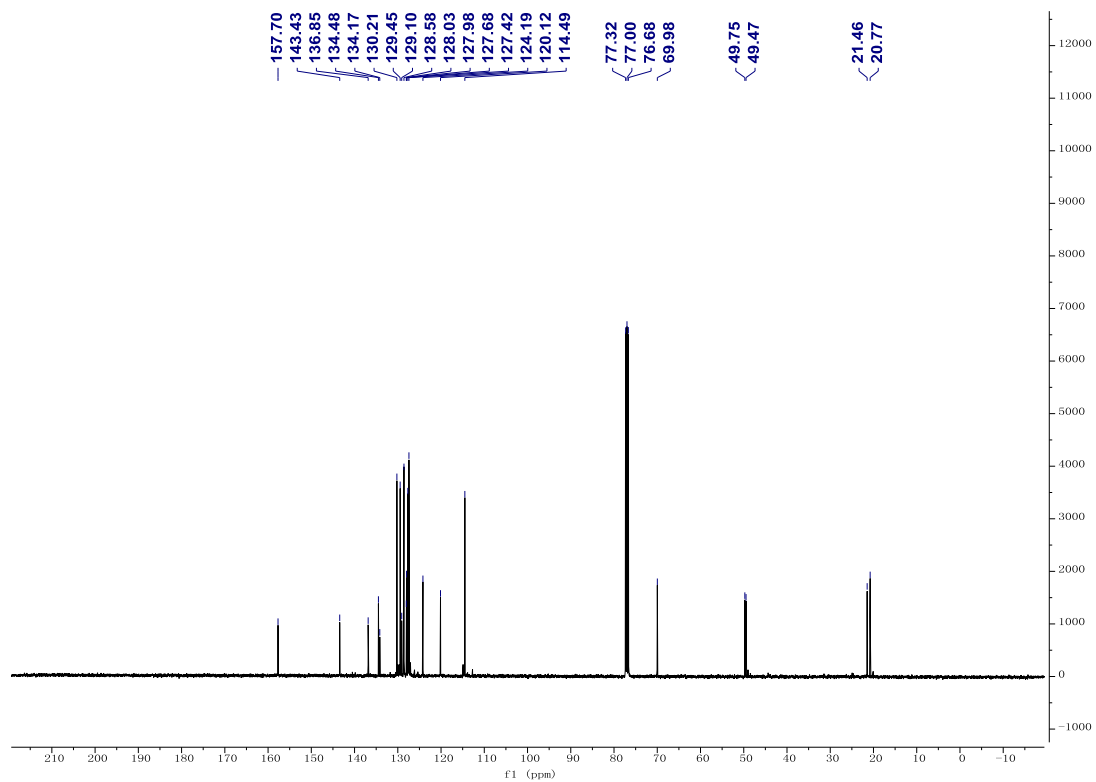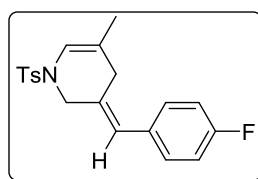

**(E)-6f**

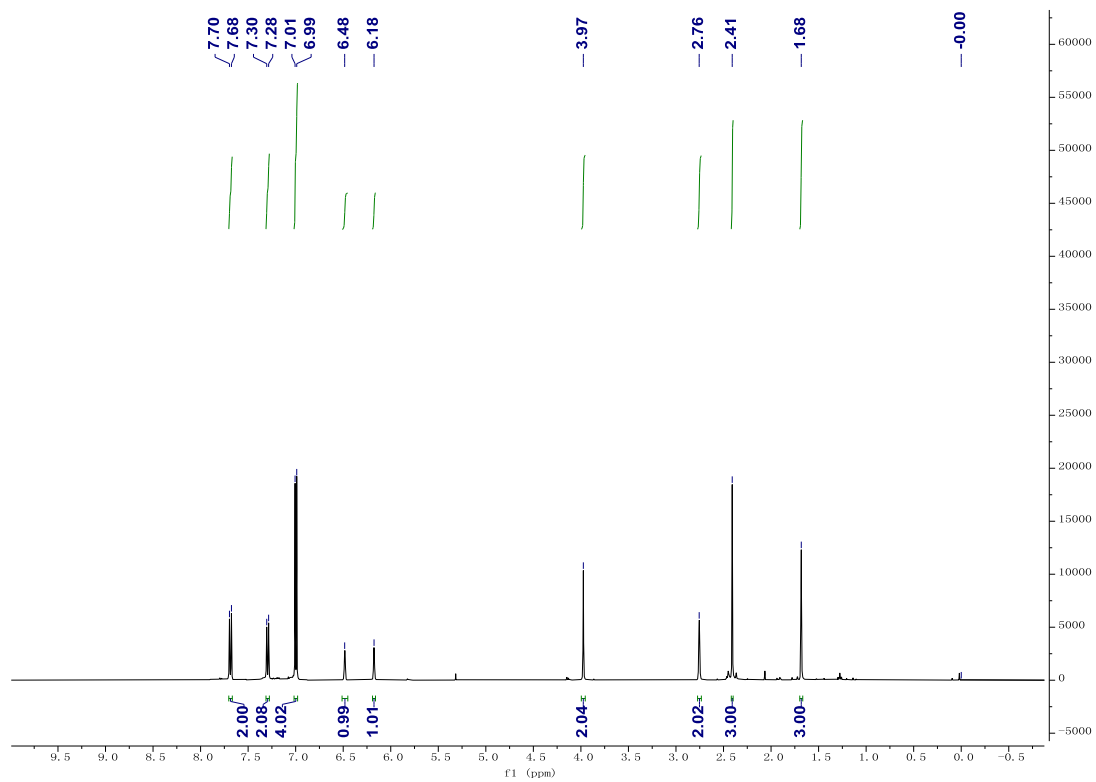

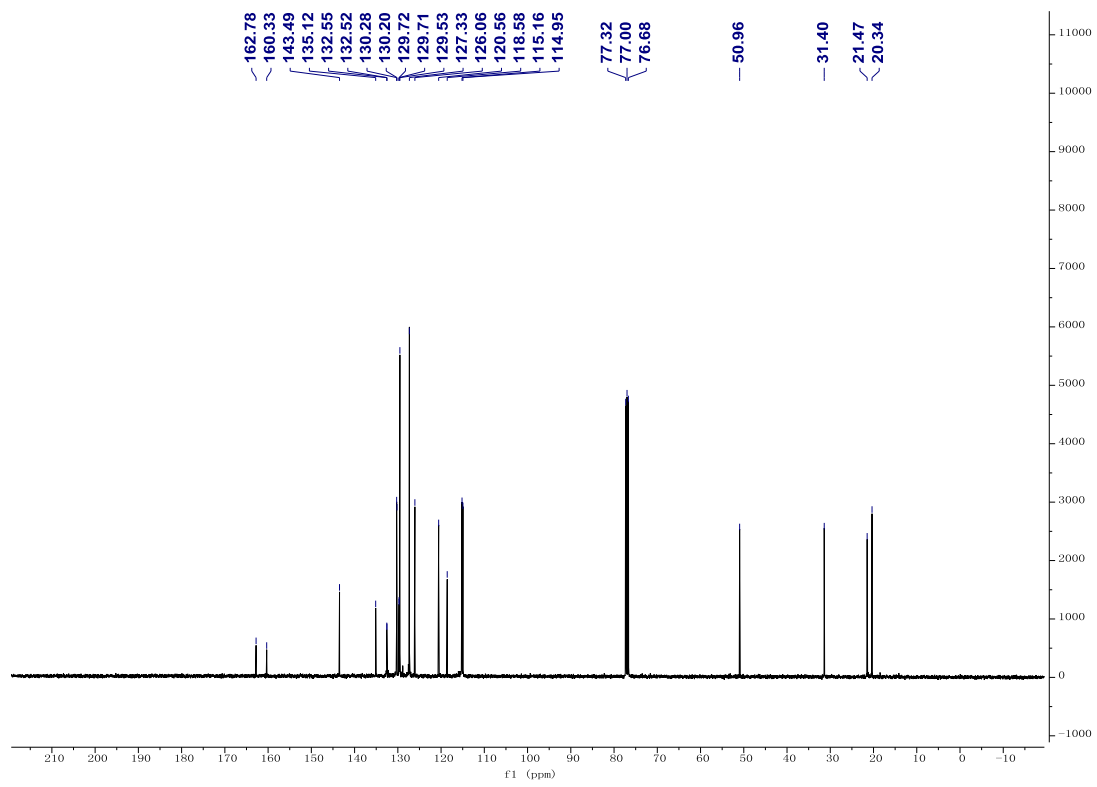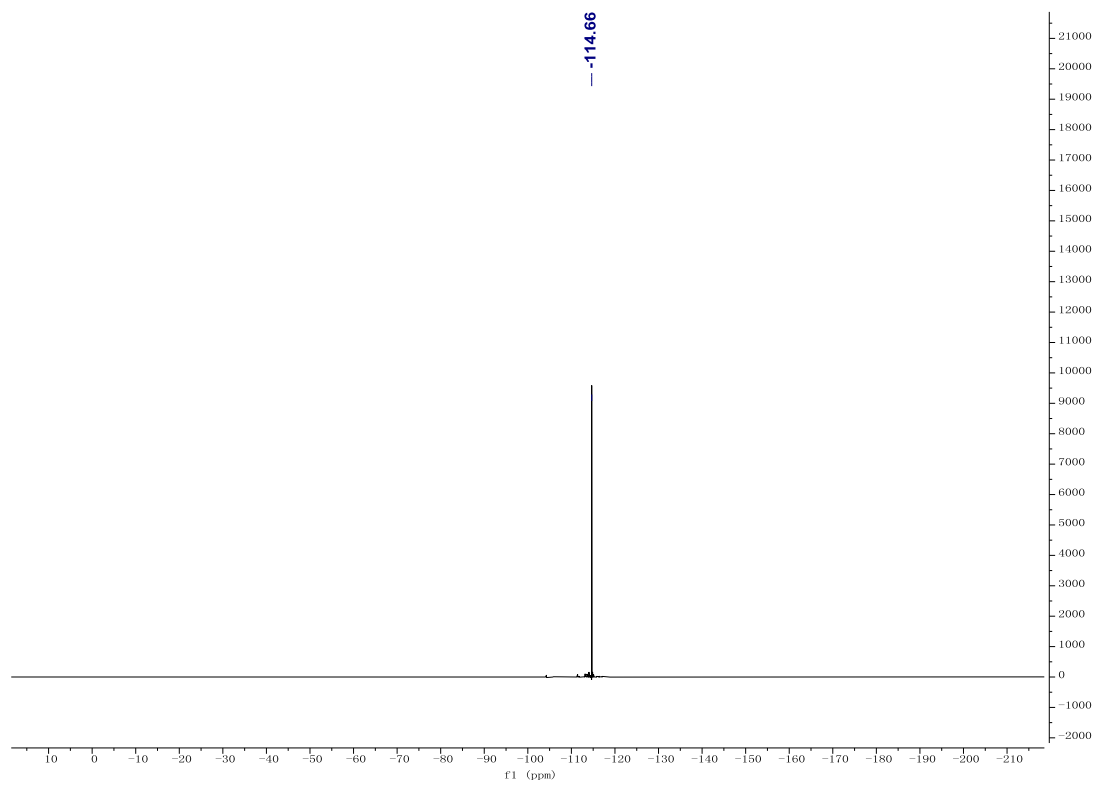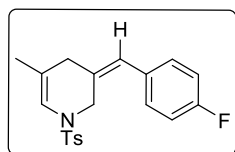

**(Z)-6f**

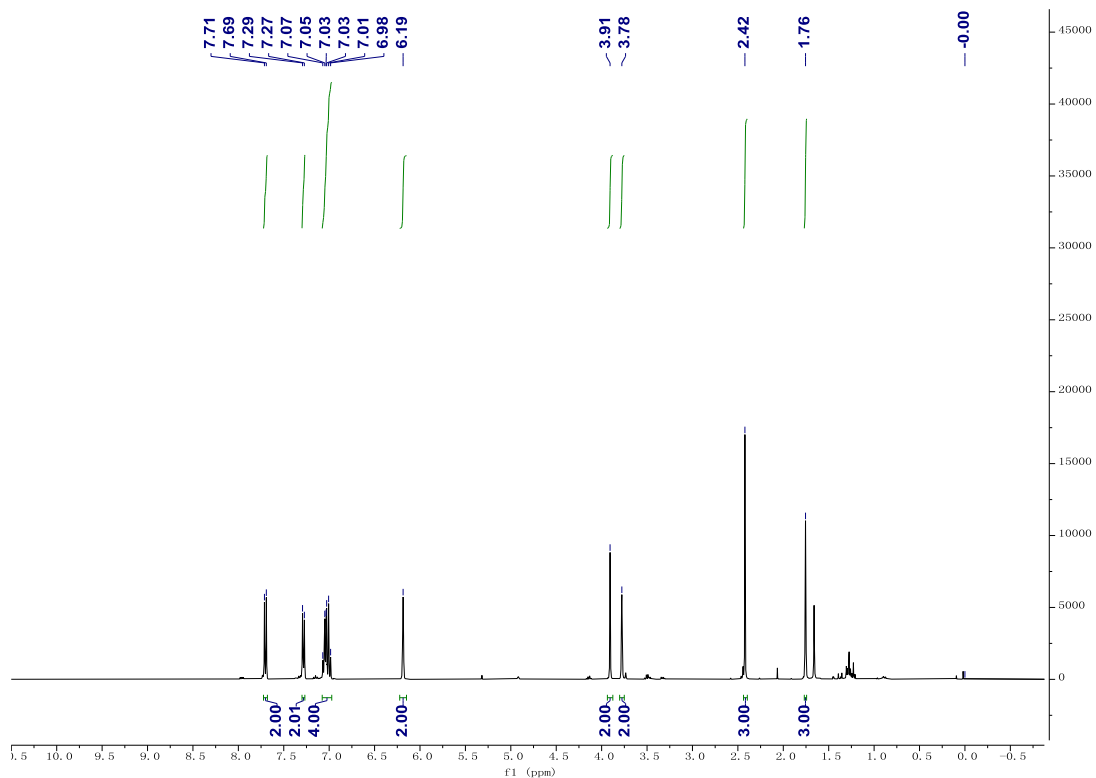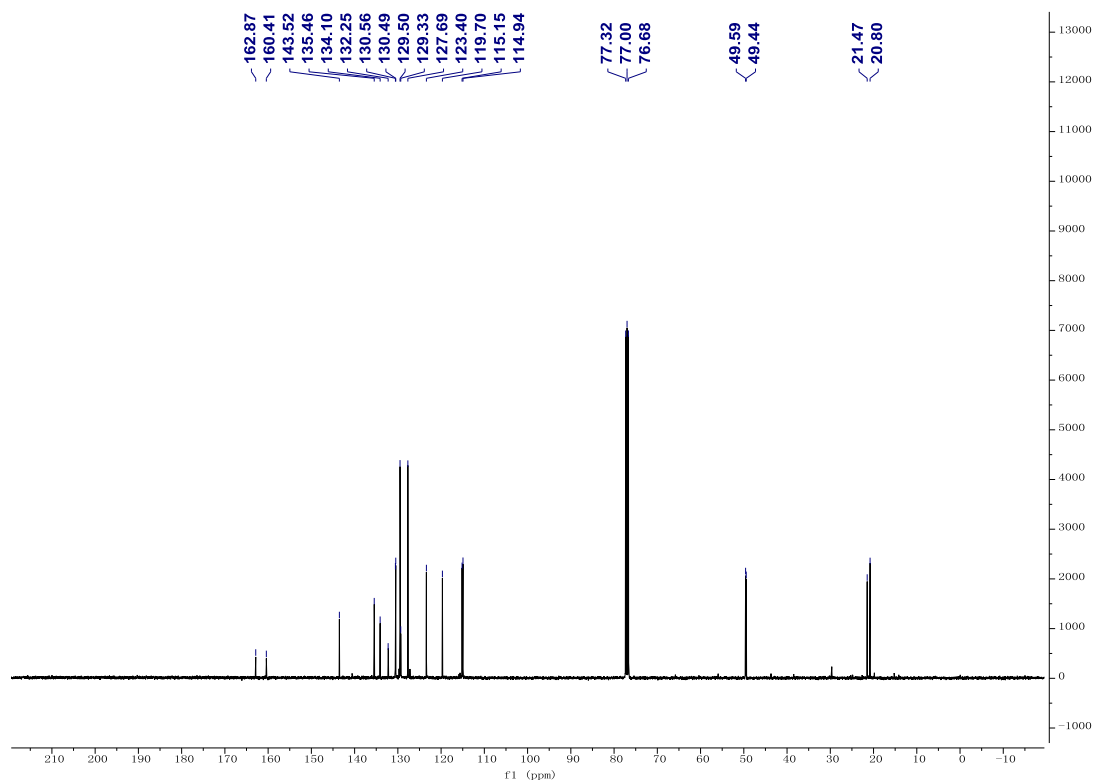

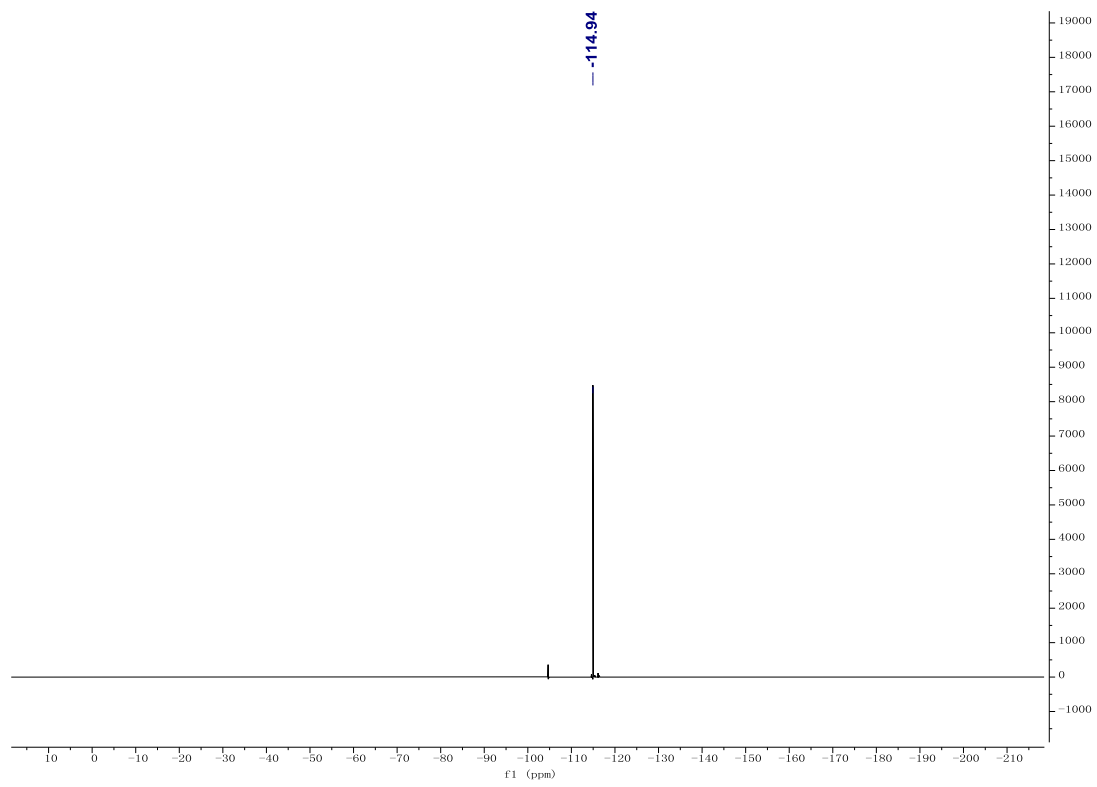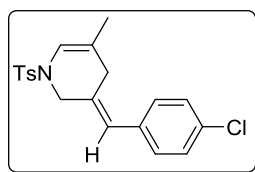

**(E)-6g**

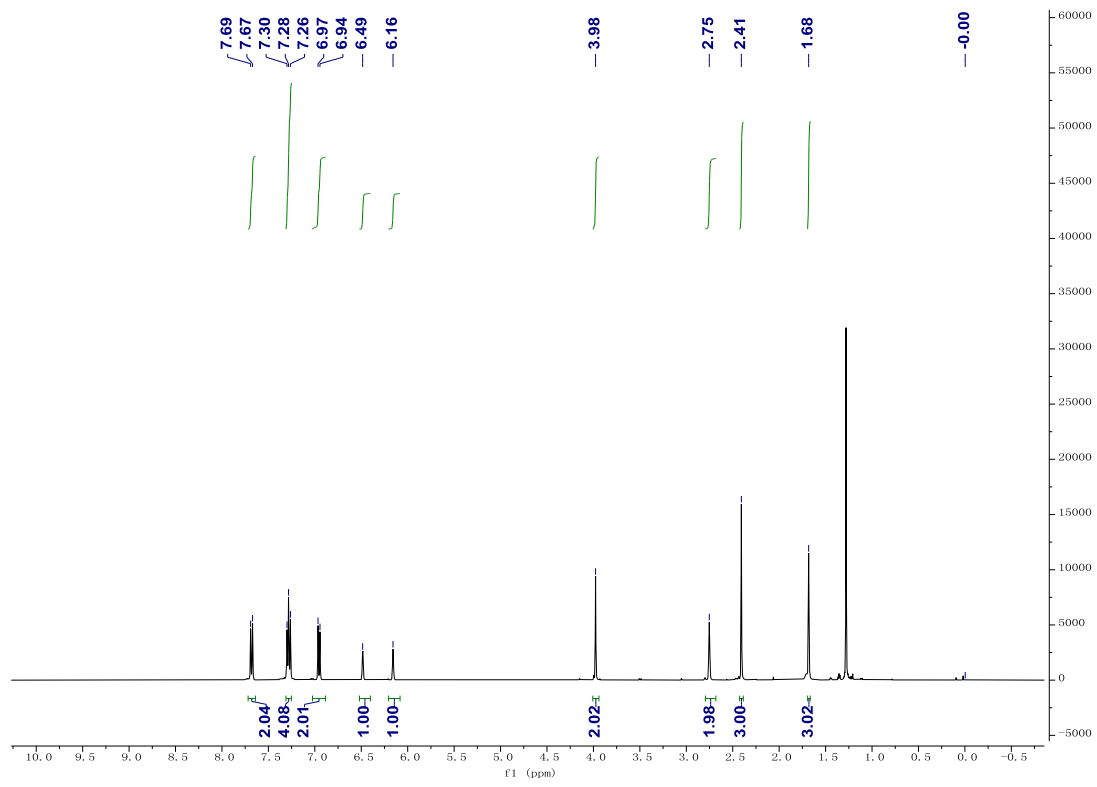



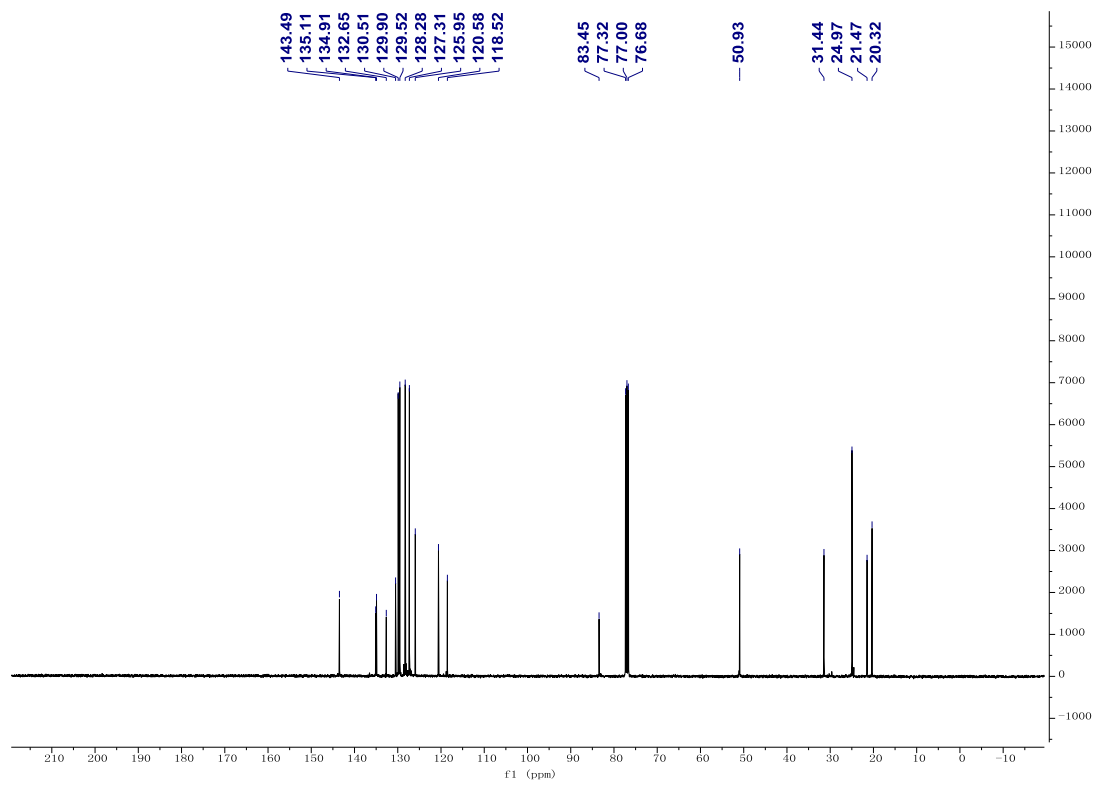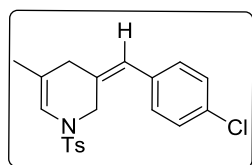

**(Z)-6g**

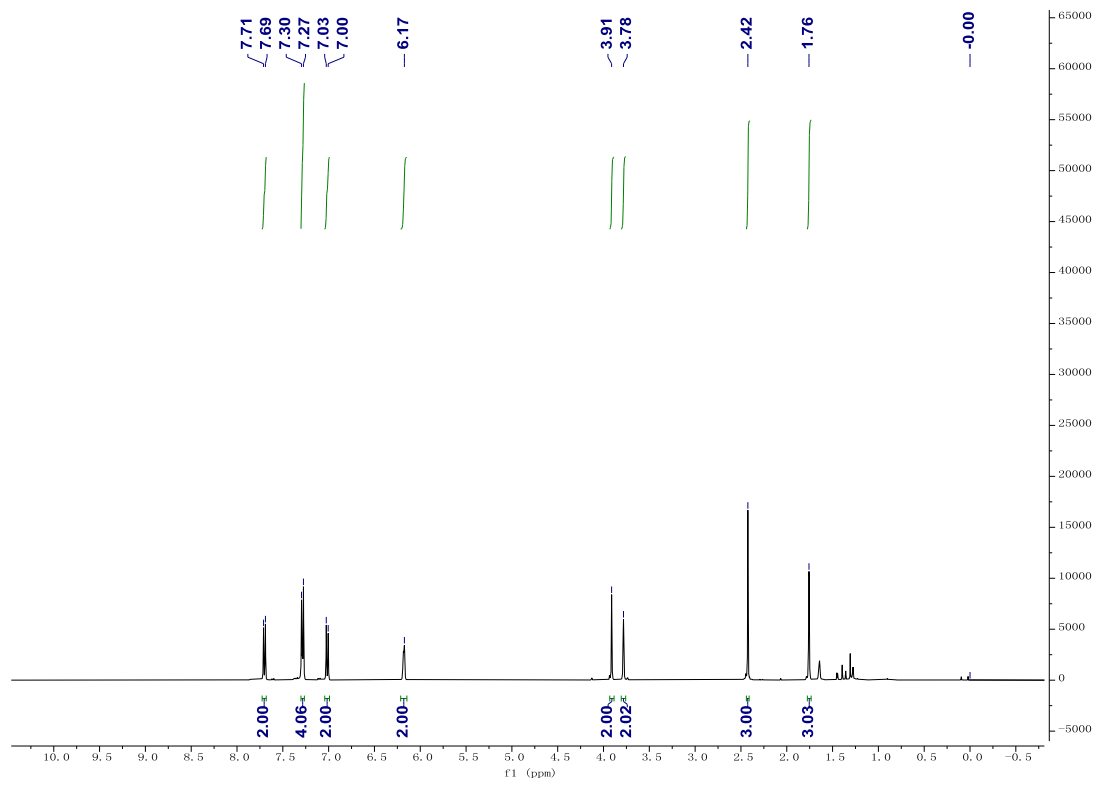

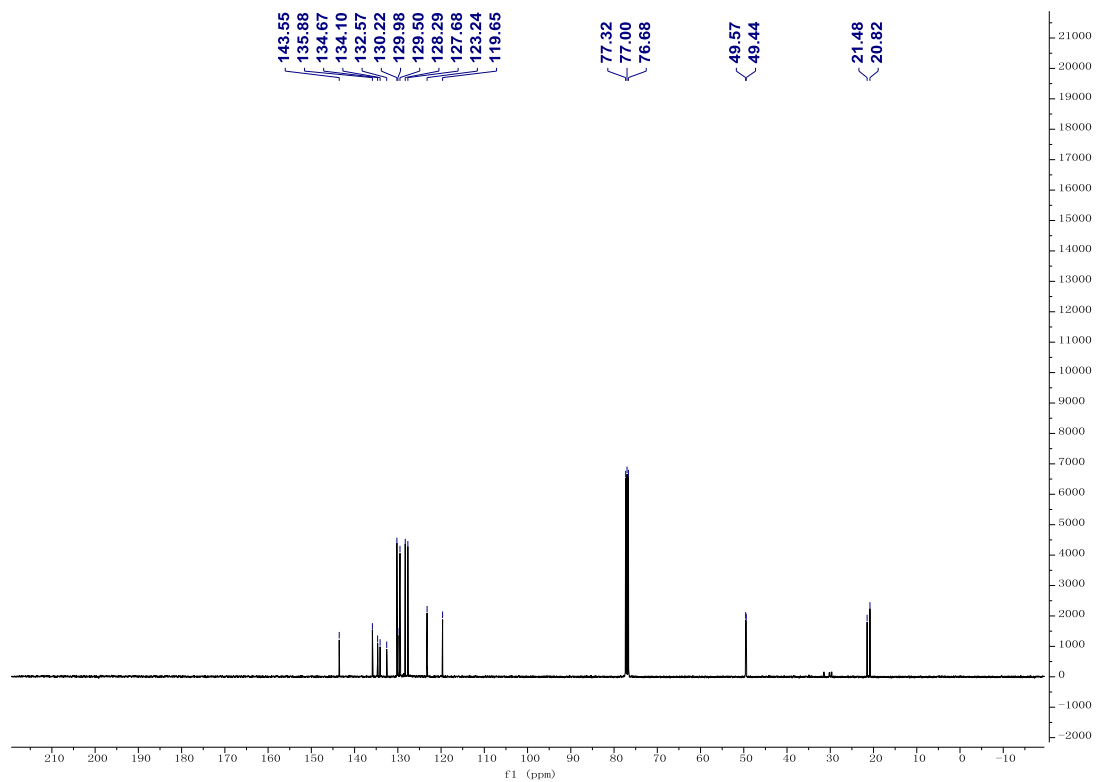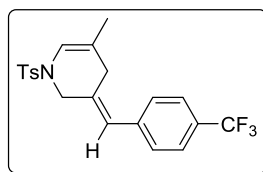

**(E)-6h**

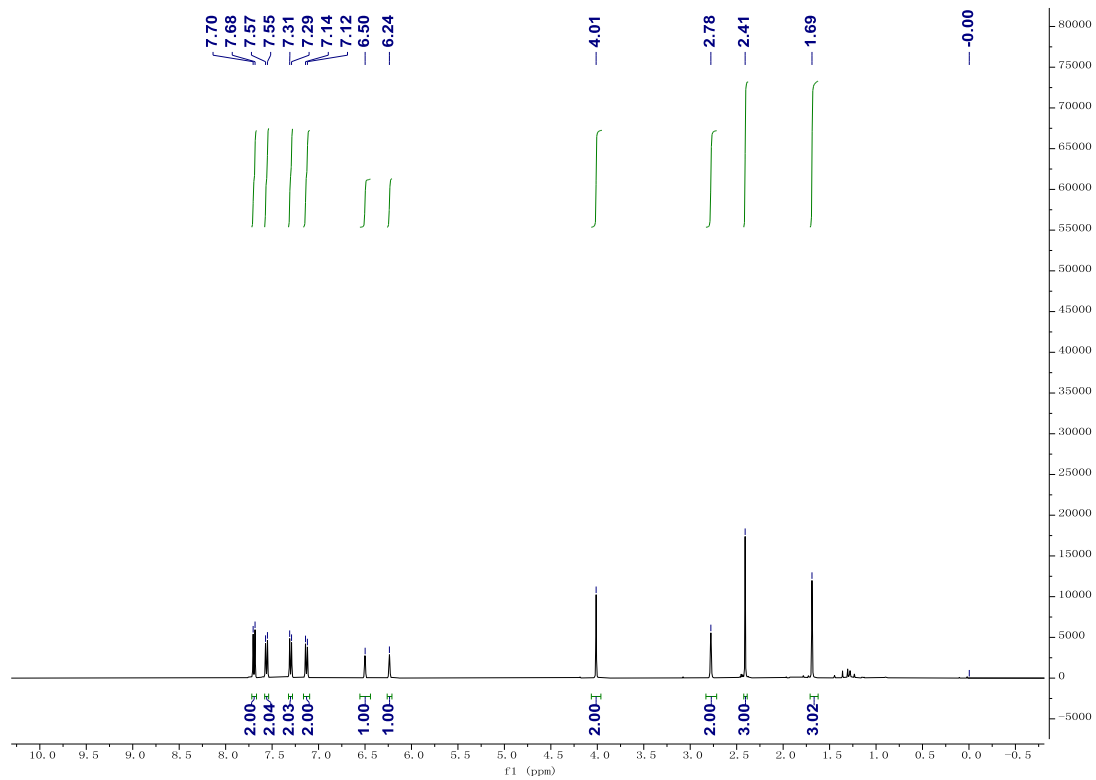

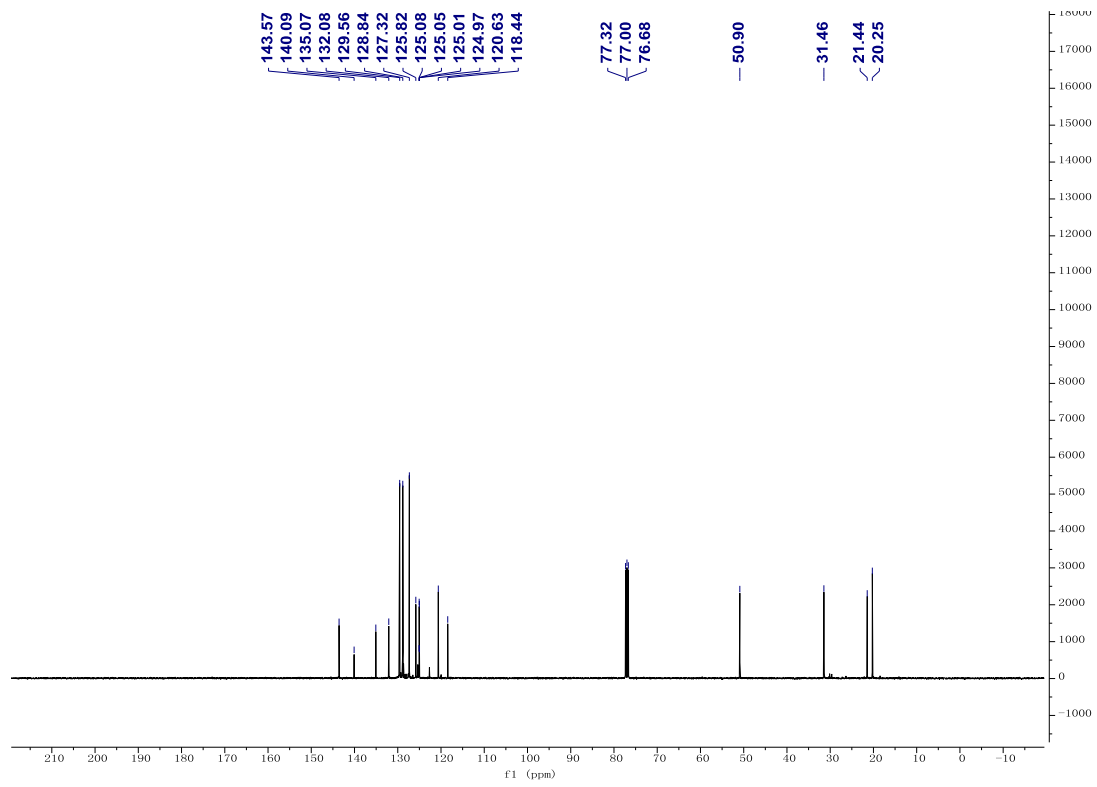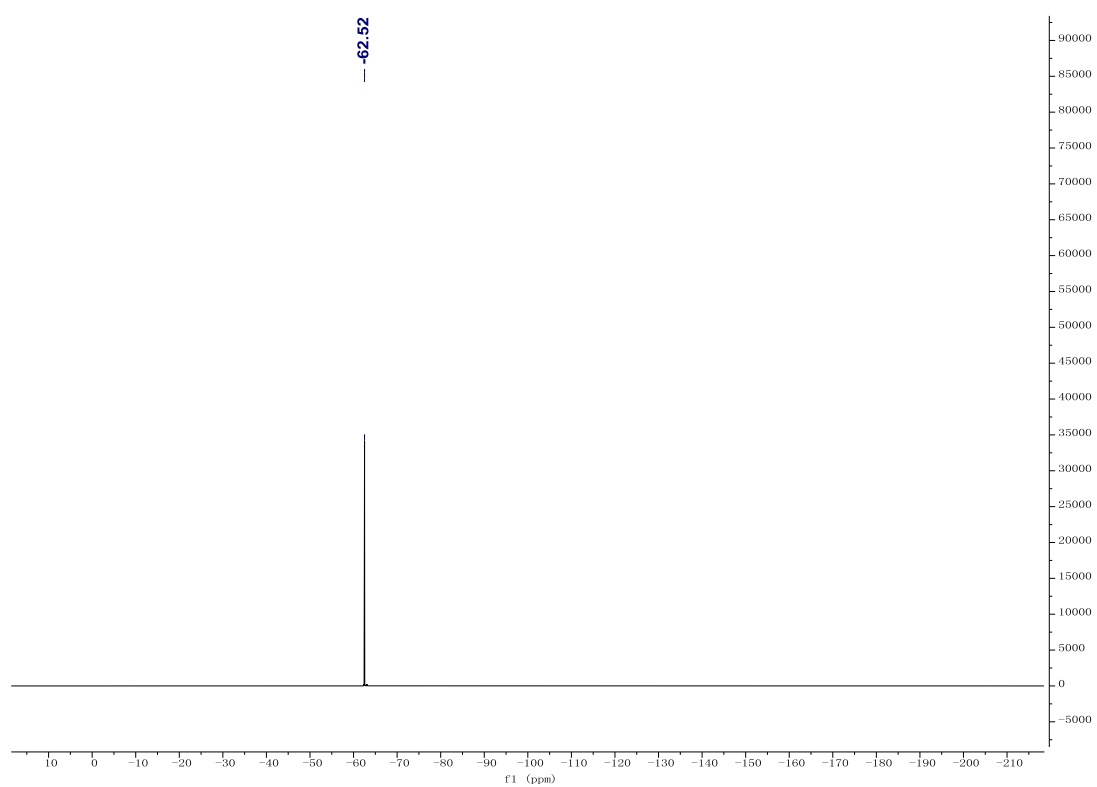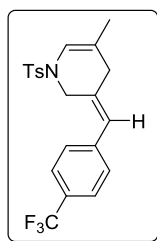

**(Z)-6h**

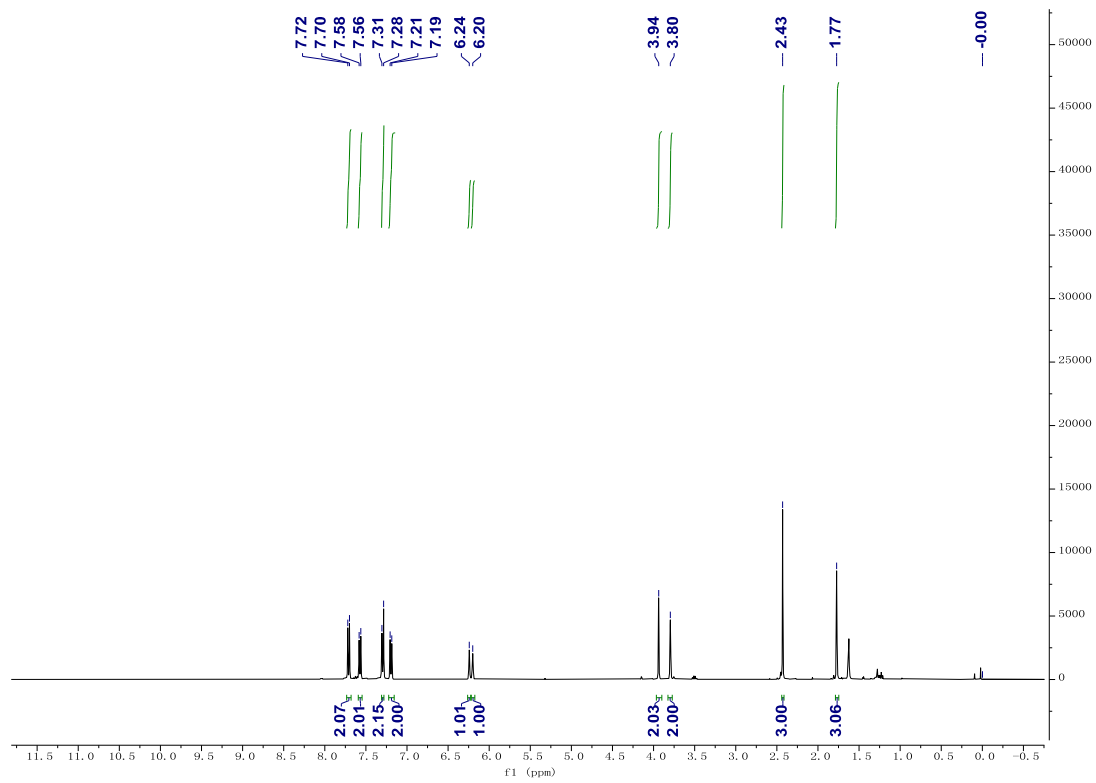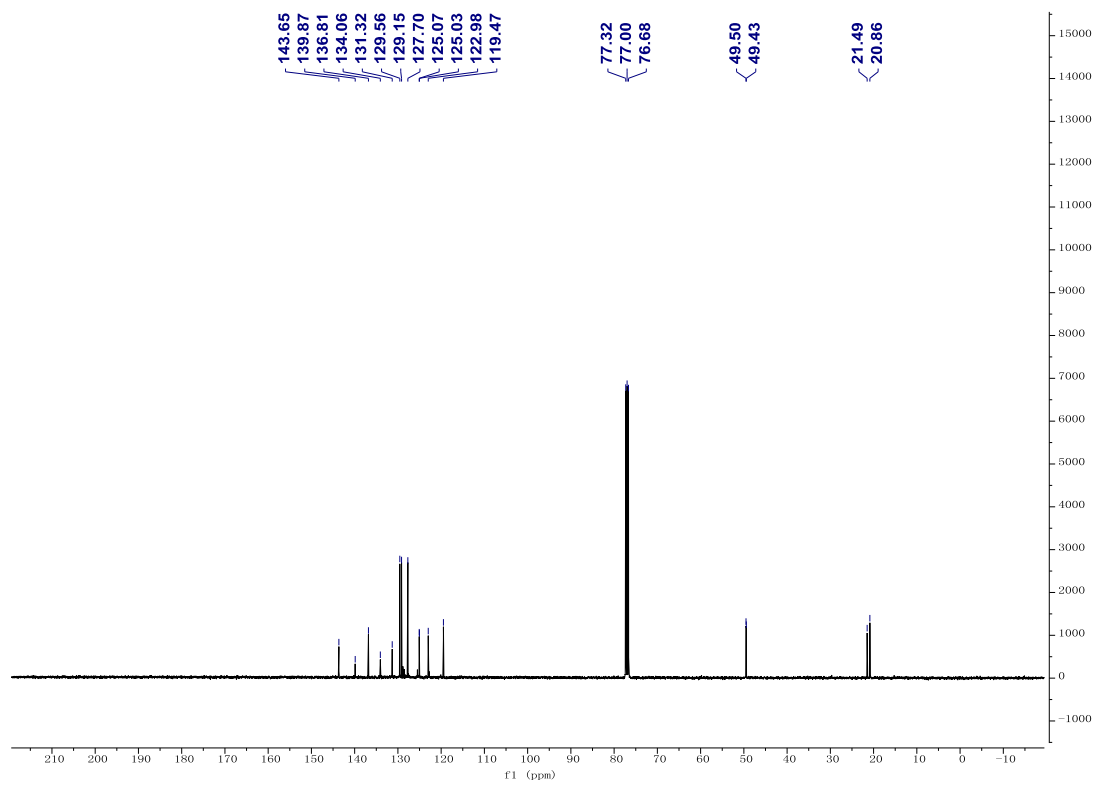

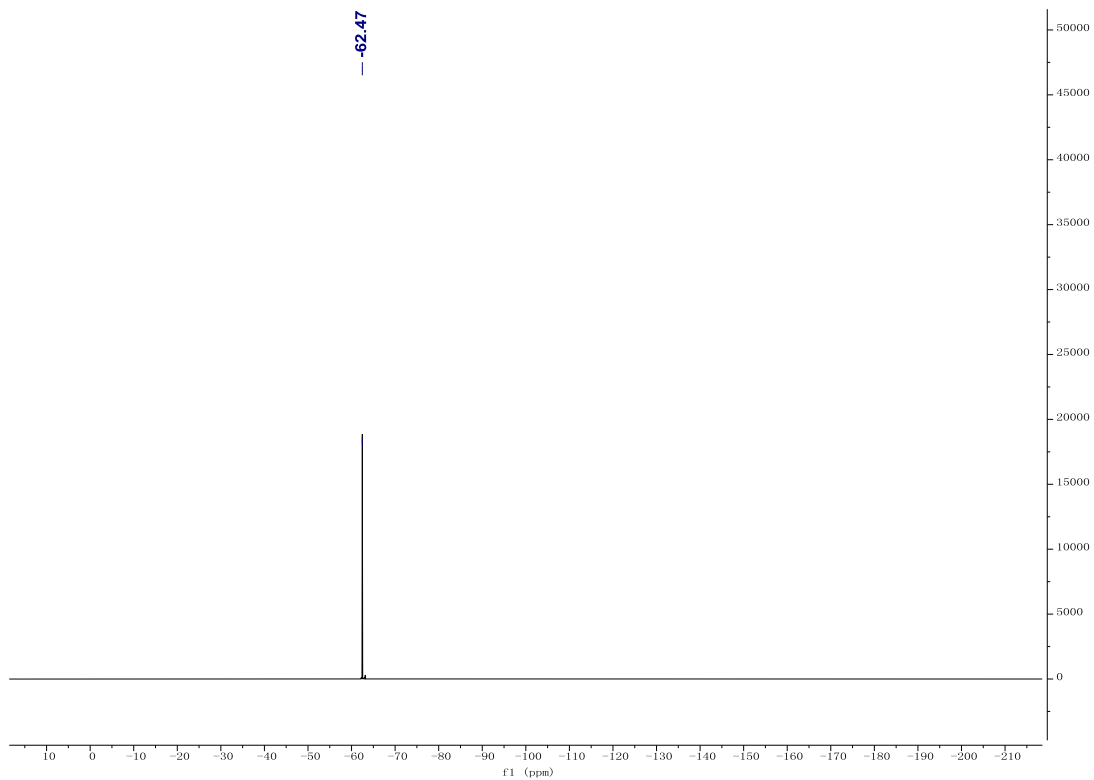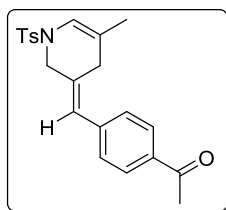

**6i**

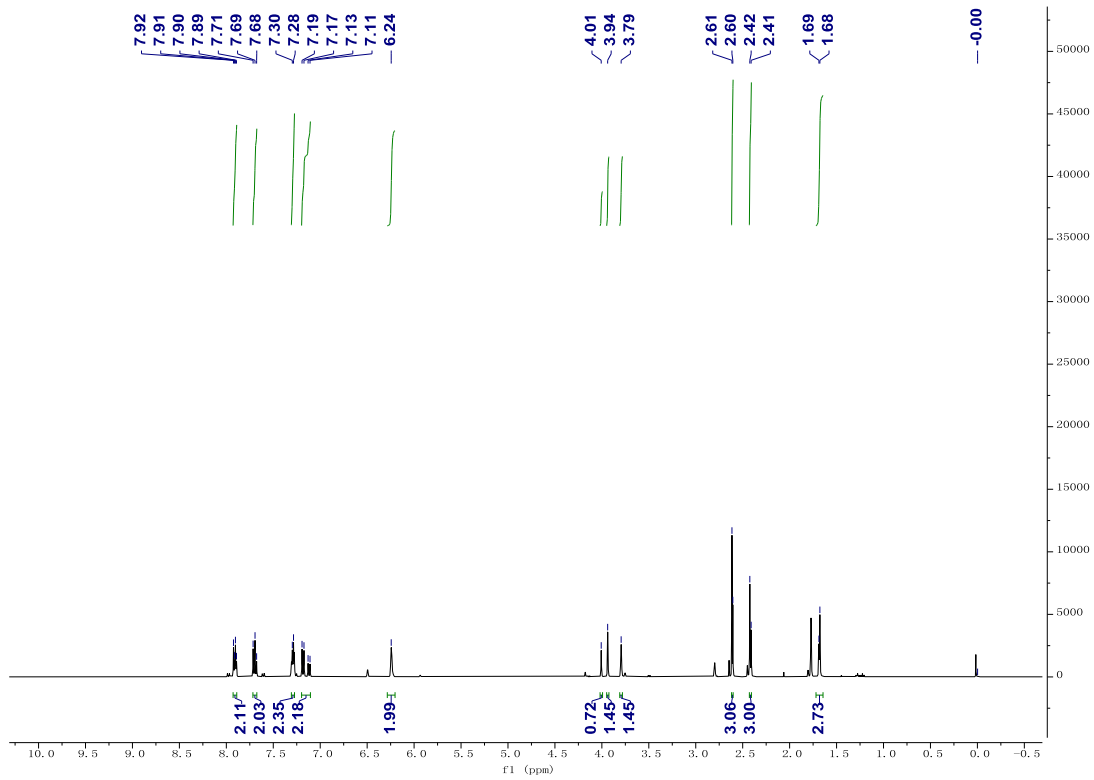

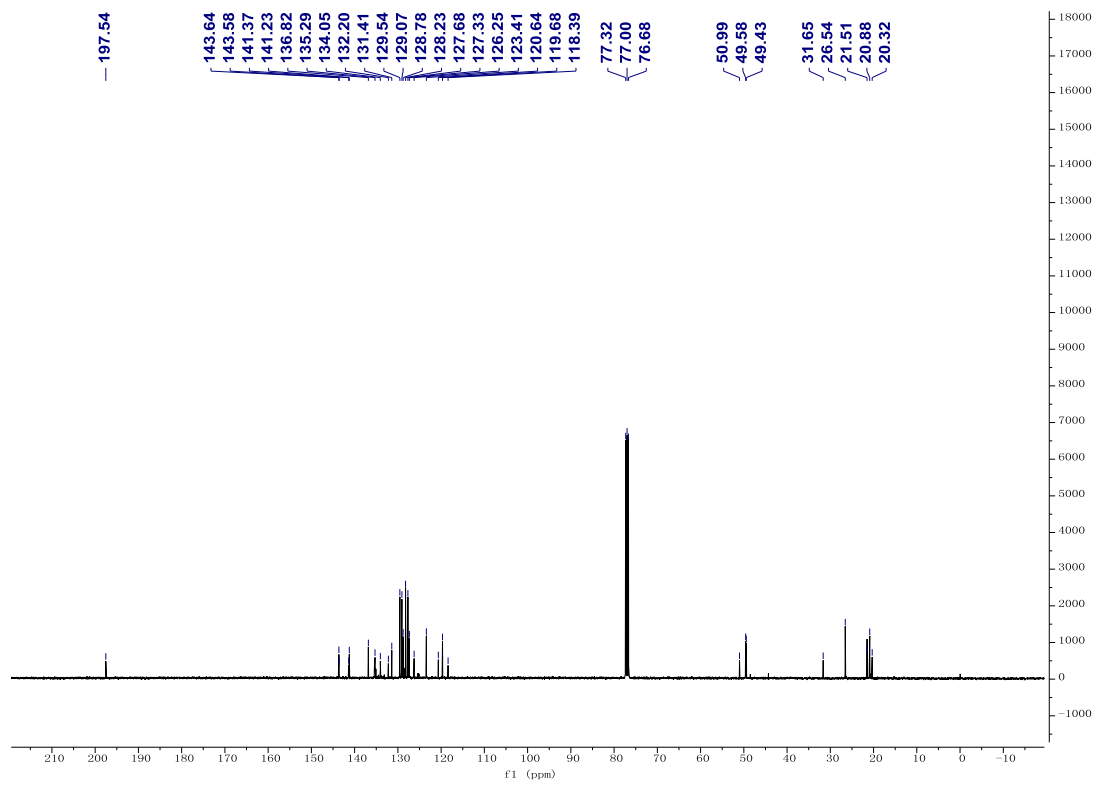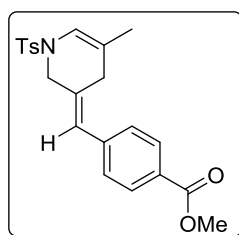

**(E)-6j**

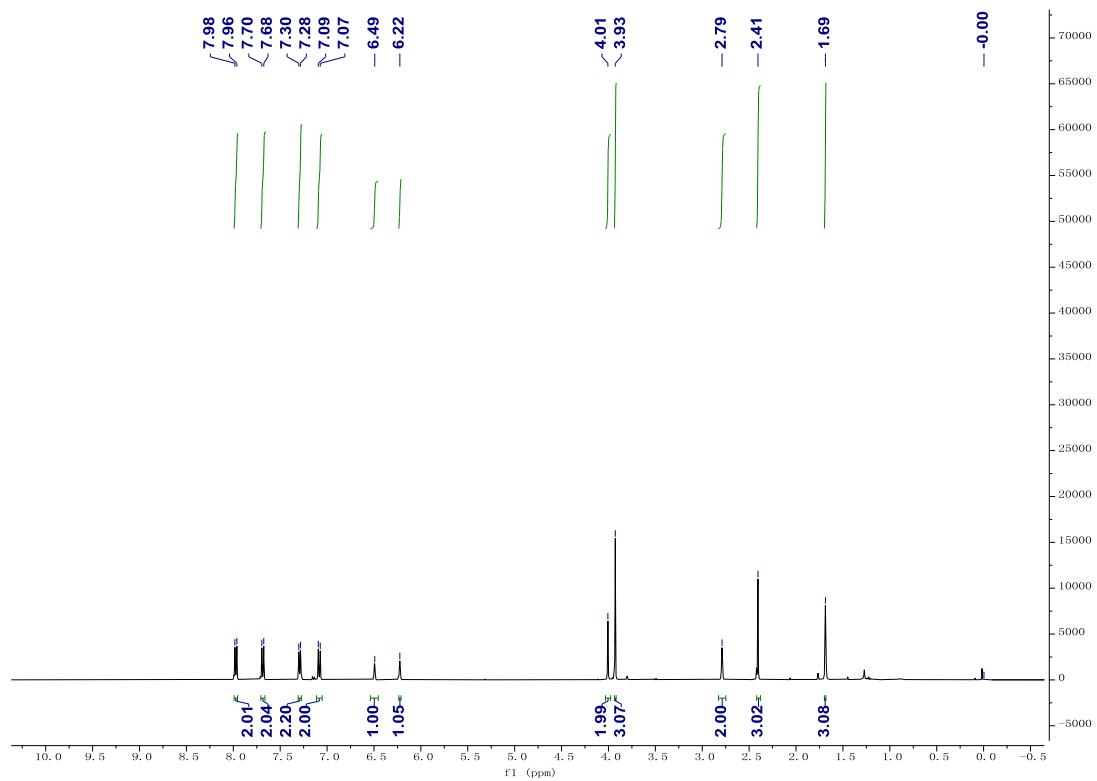

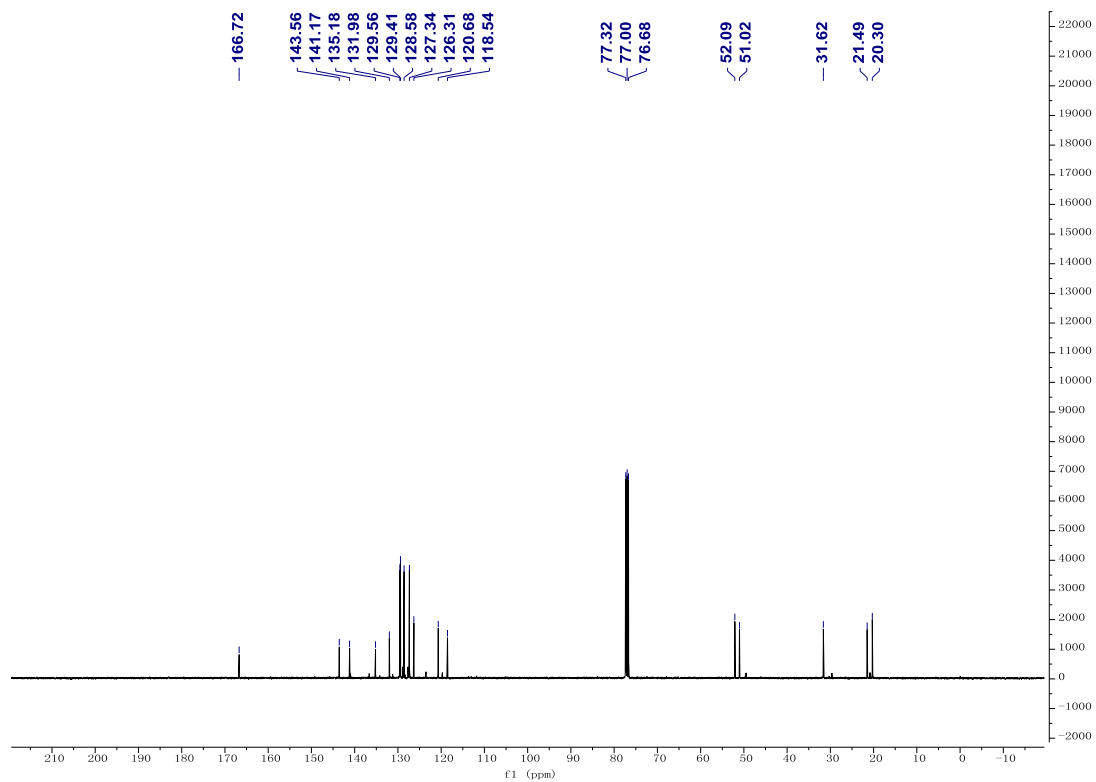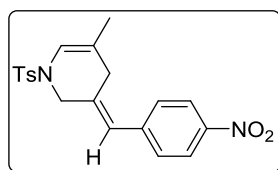

**6k**

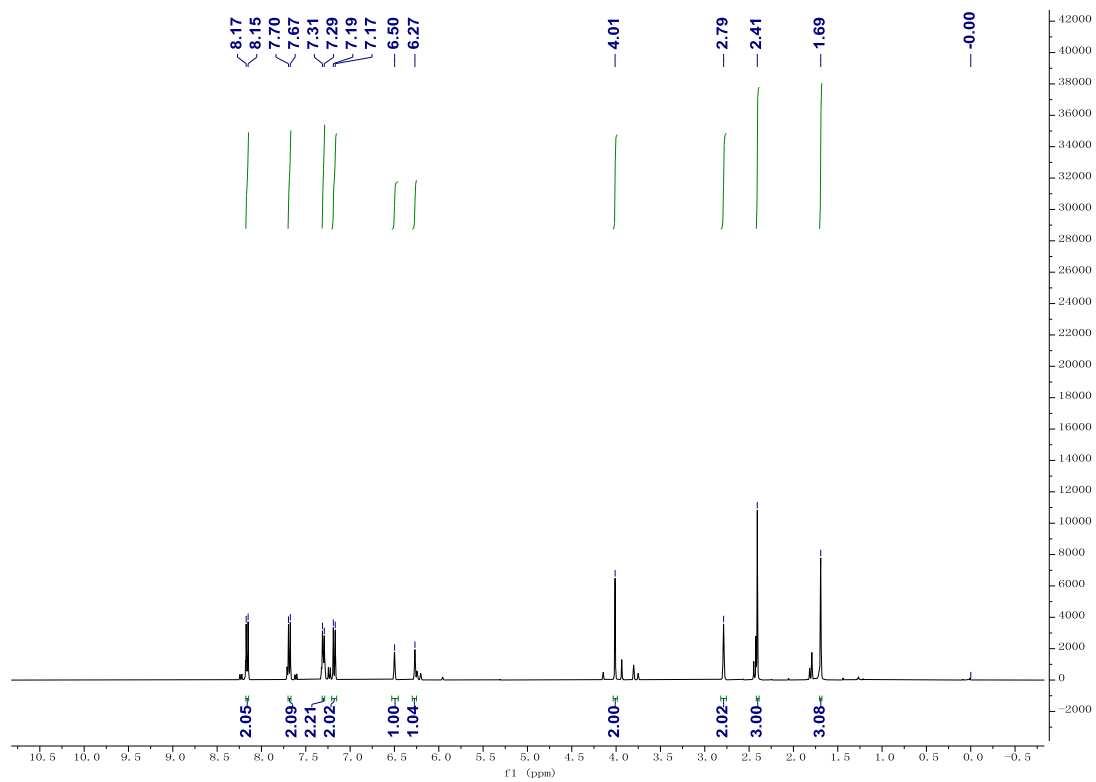

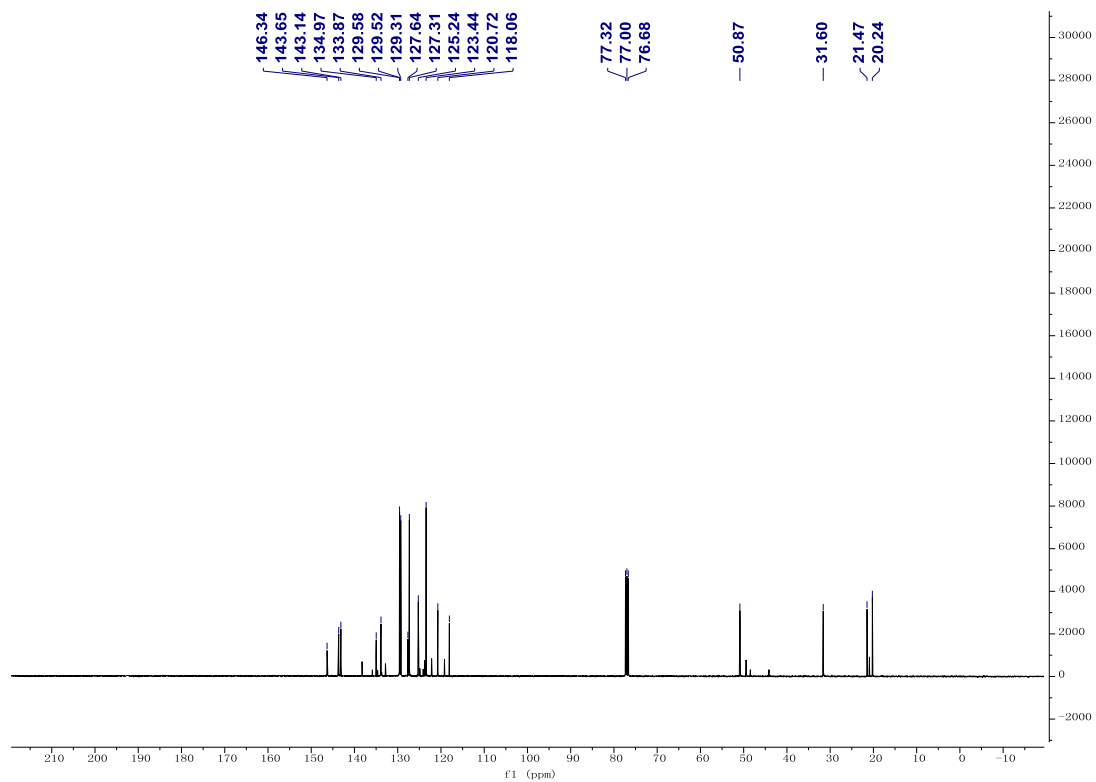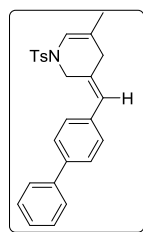

(Z)-6I

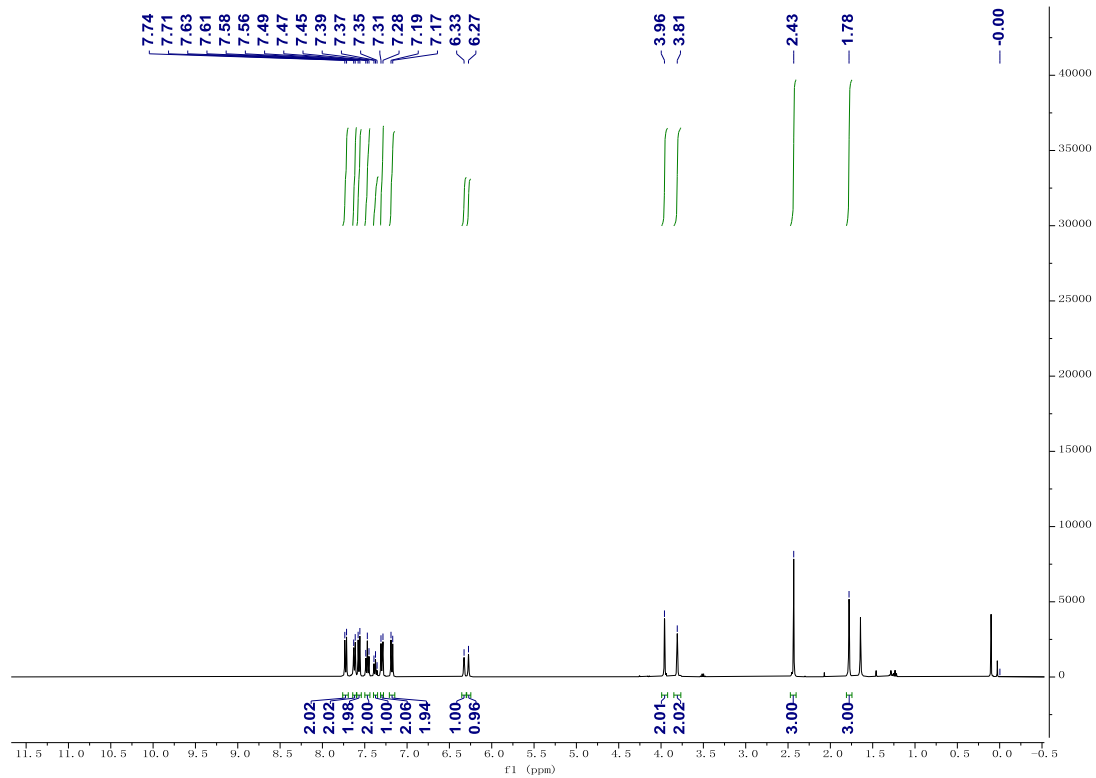



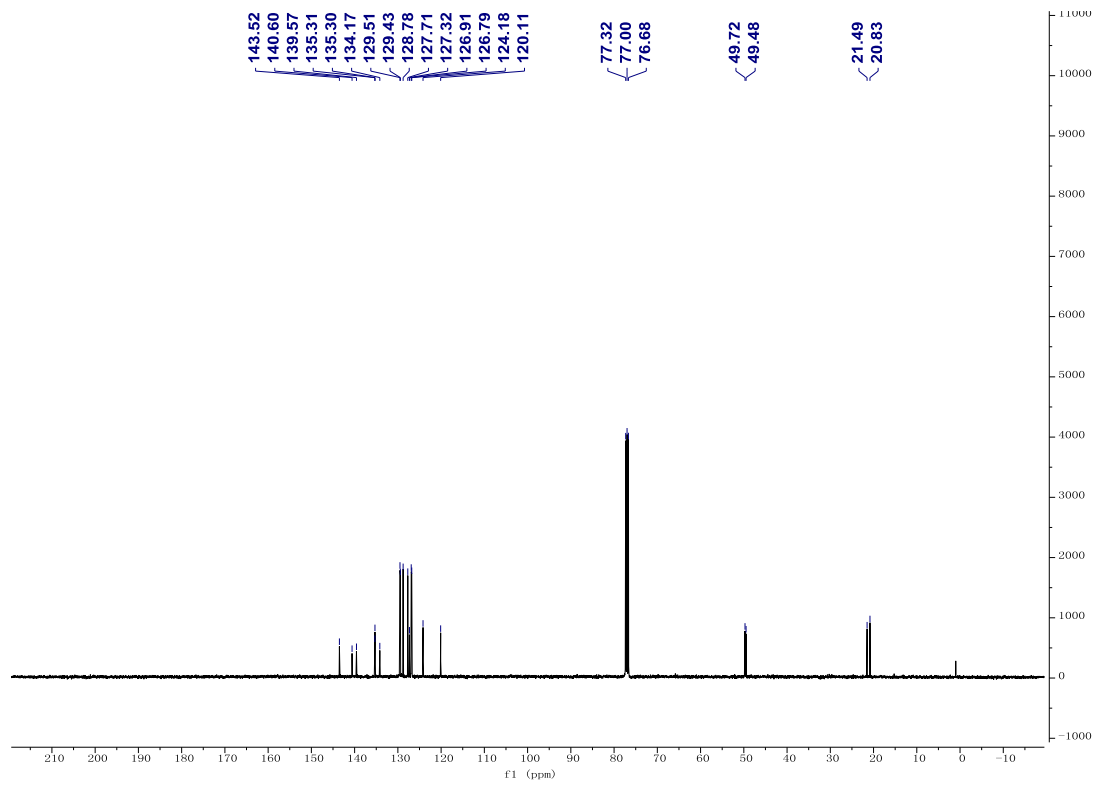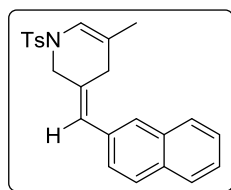

**(E)-6m**

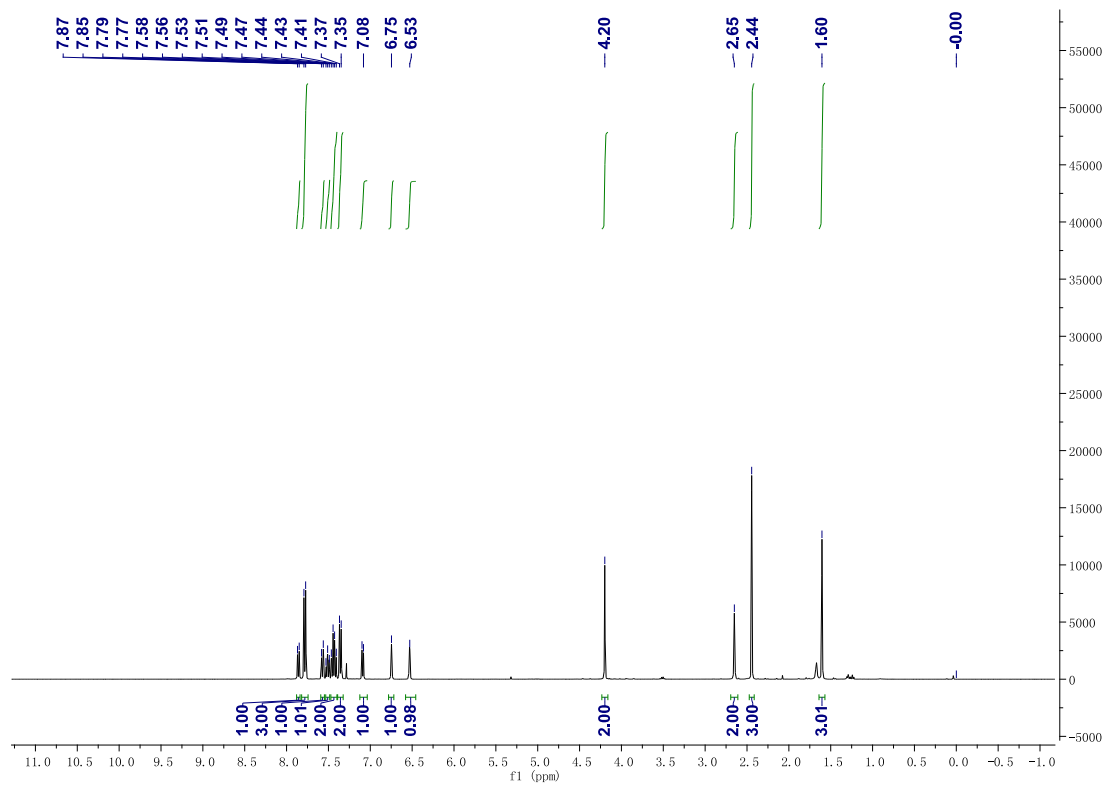

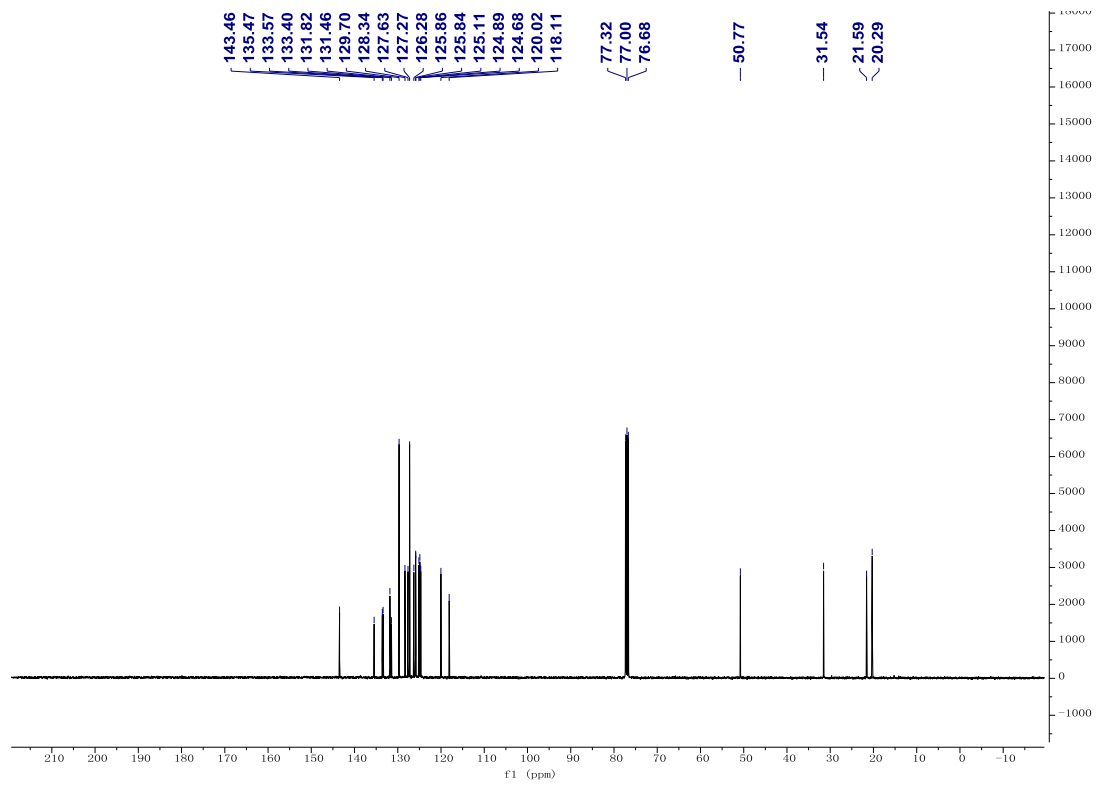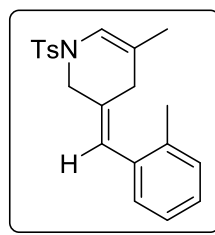

**(E)-6n**

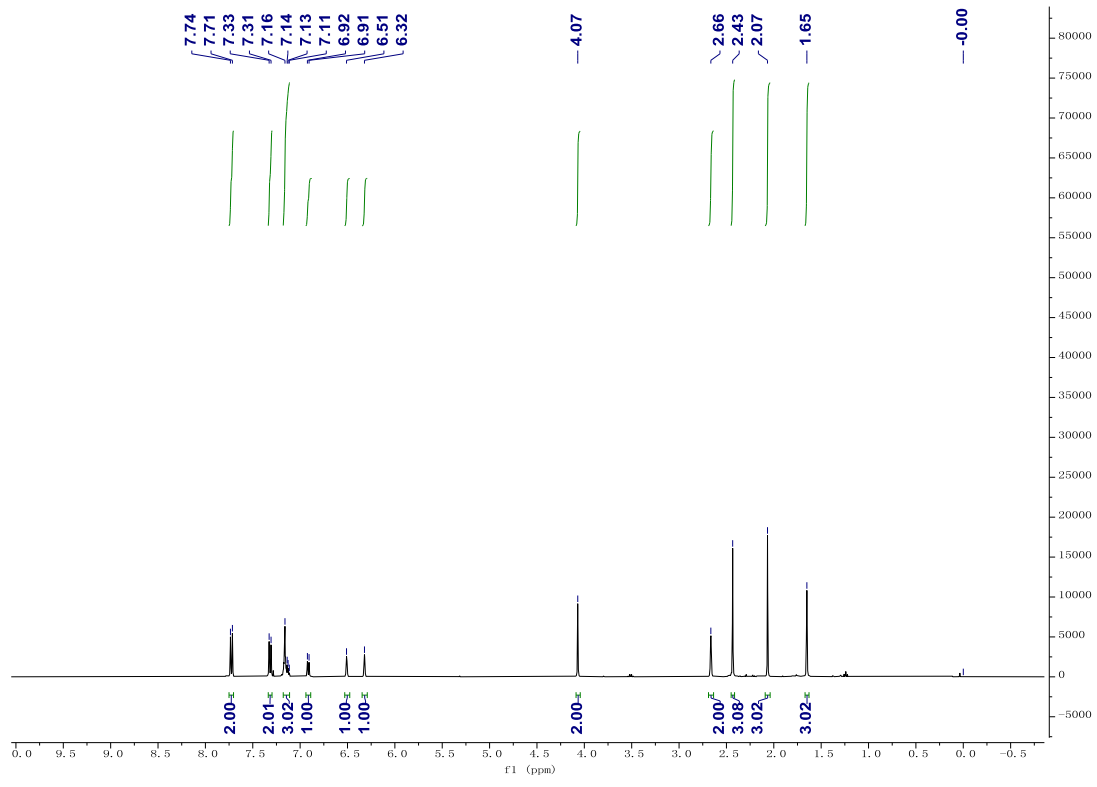

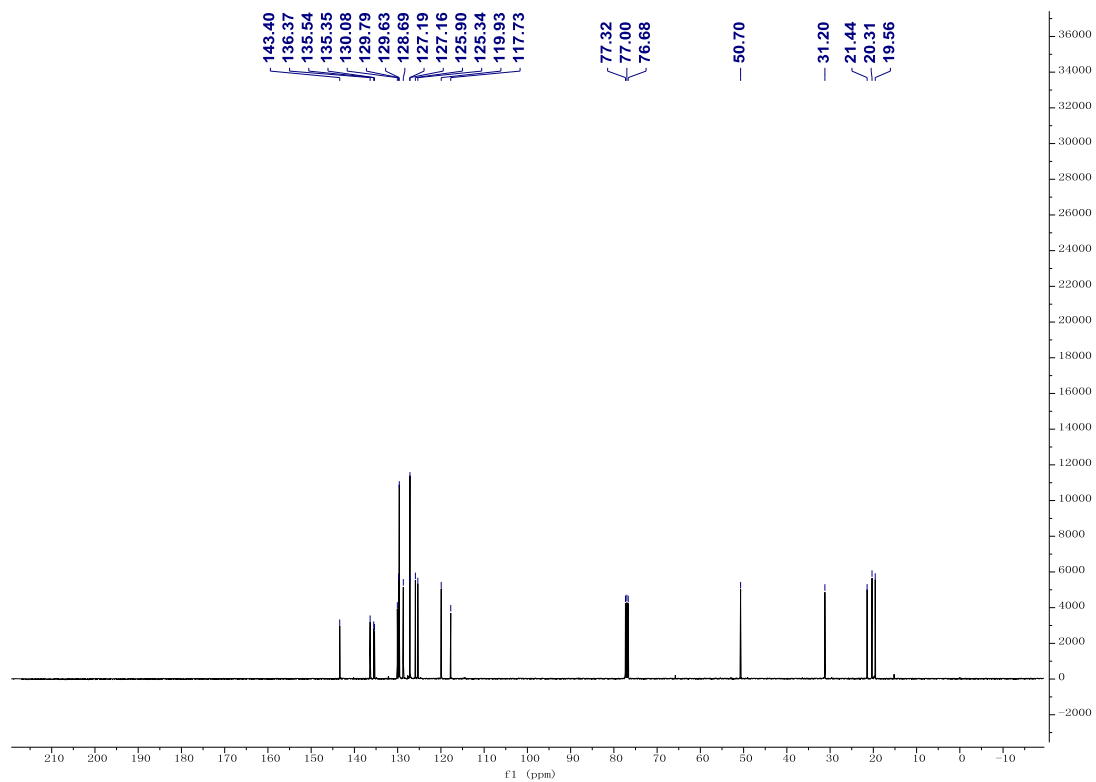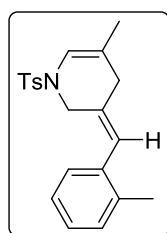

**(Z)-6n**

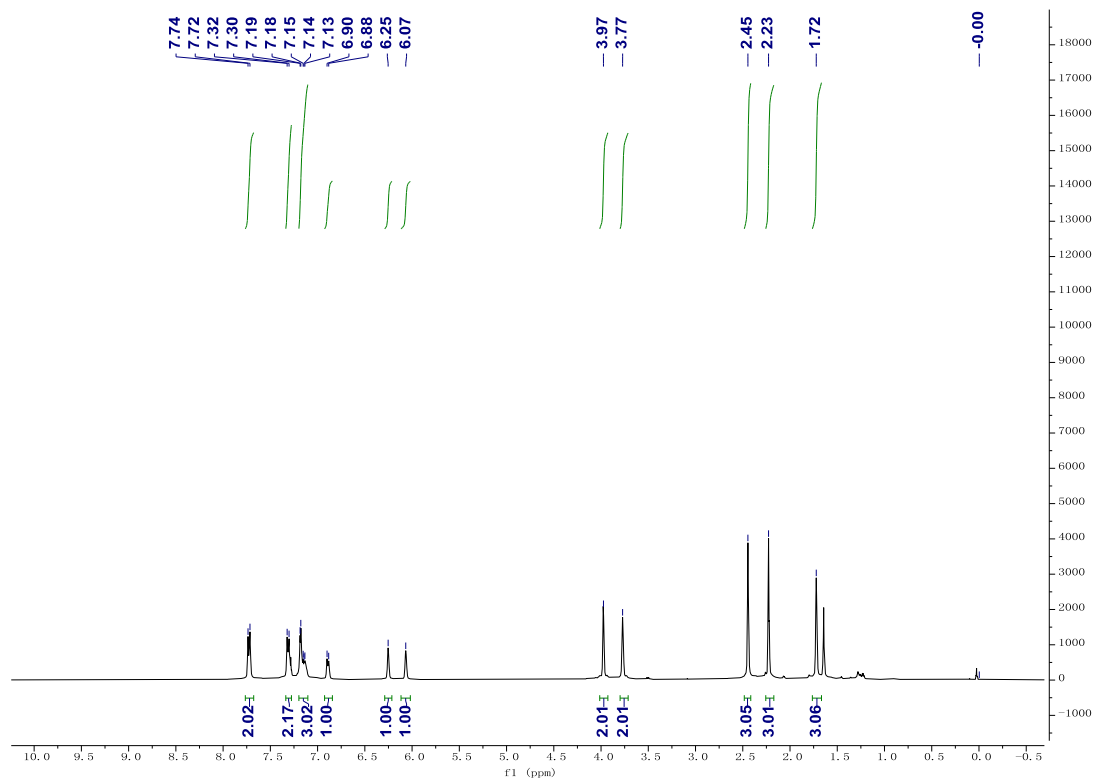

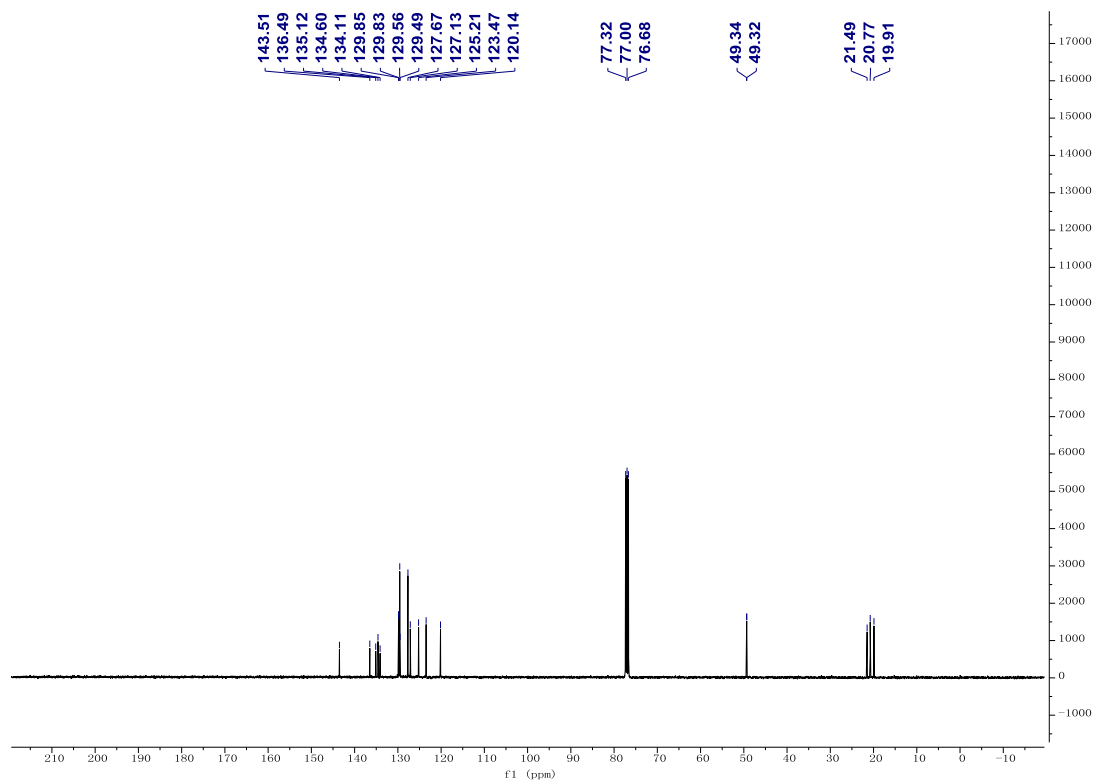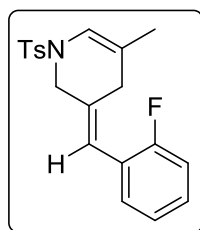

**(E)-60**

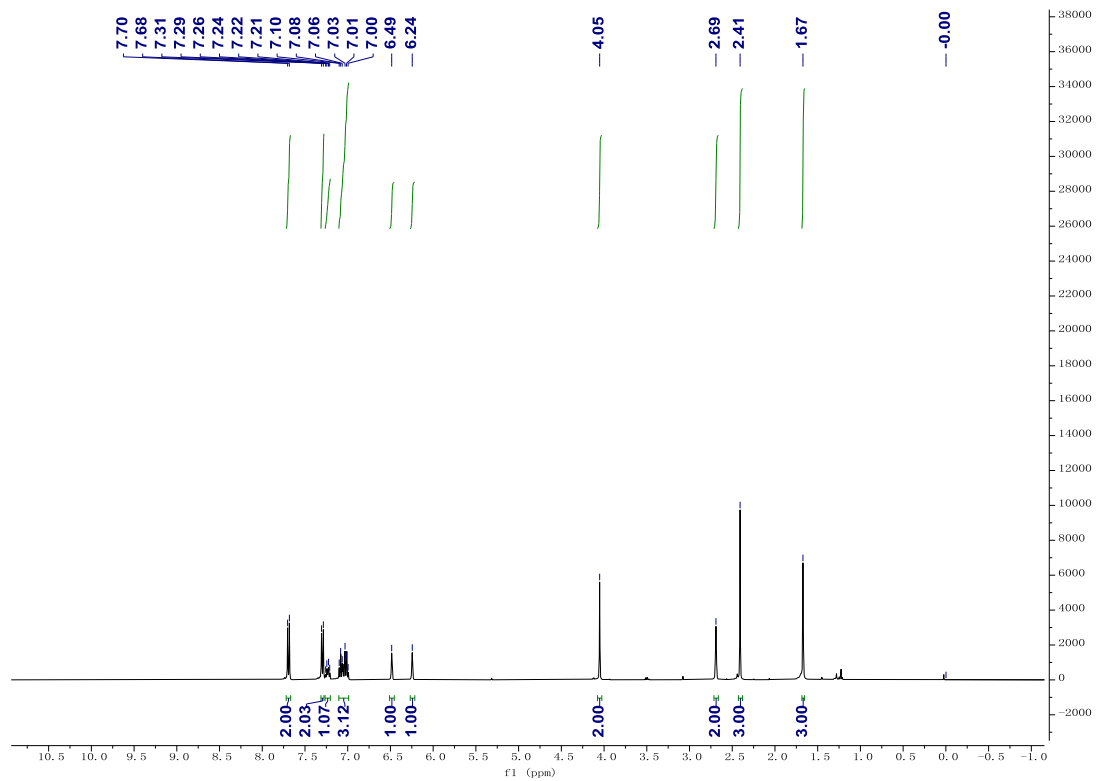

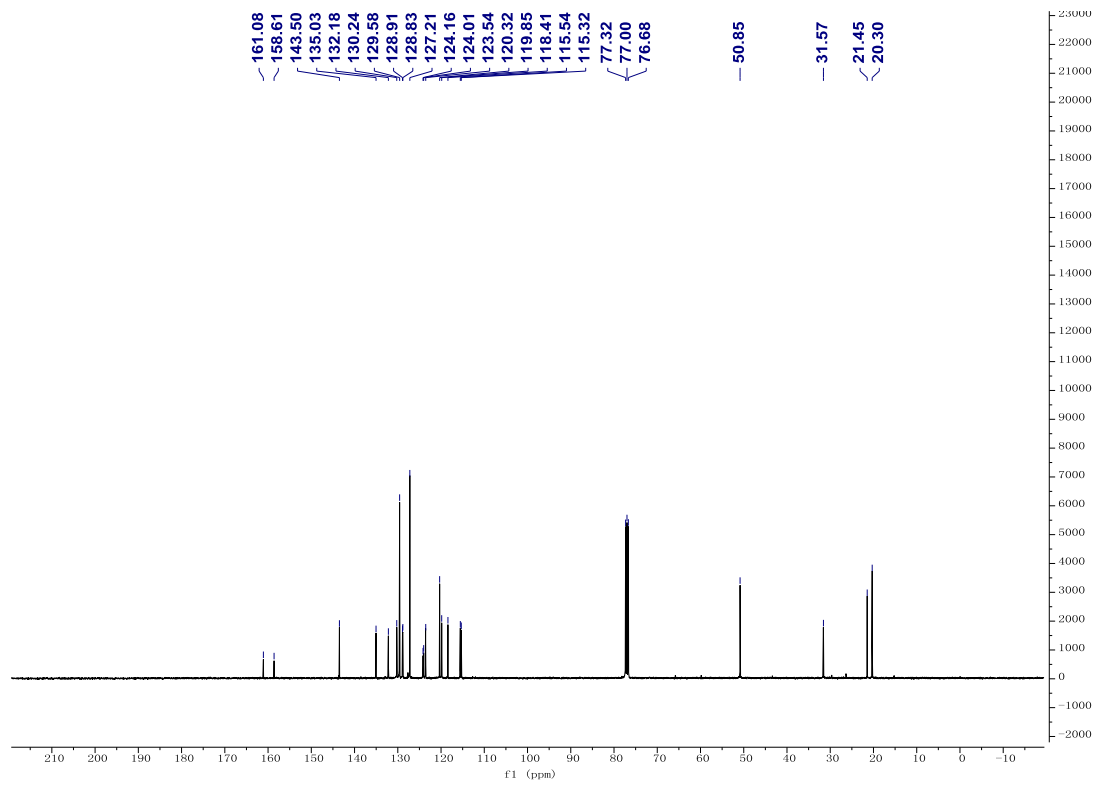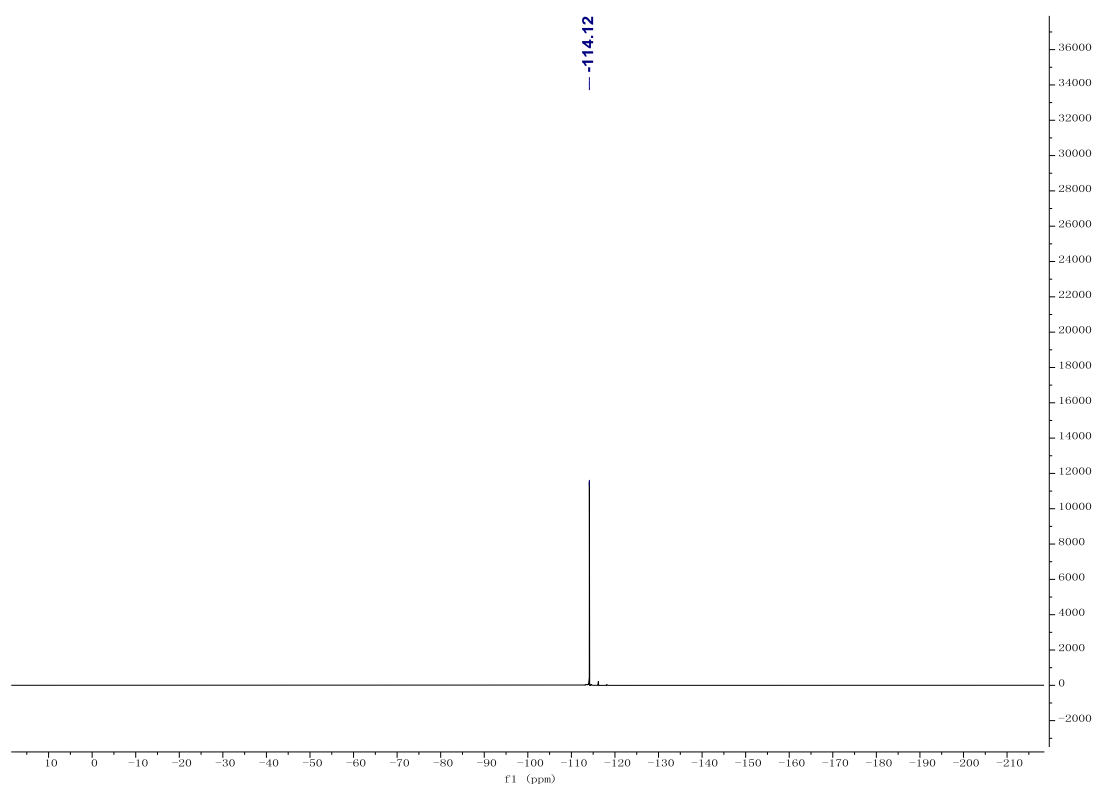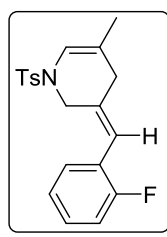

(Z)-60

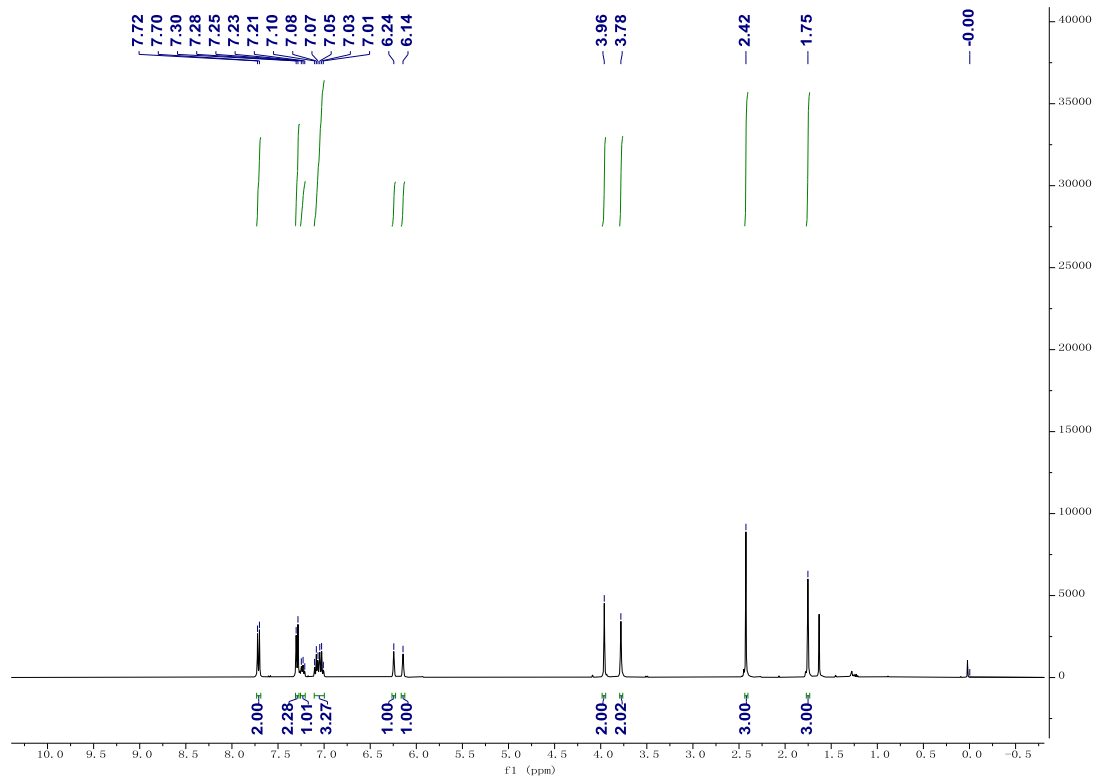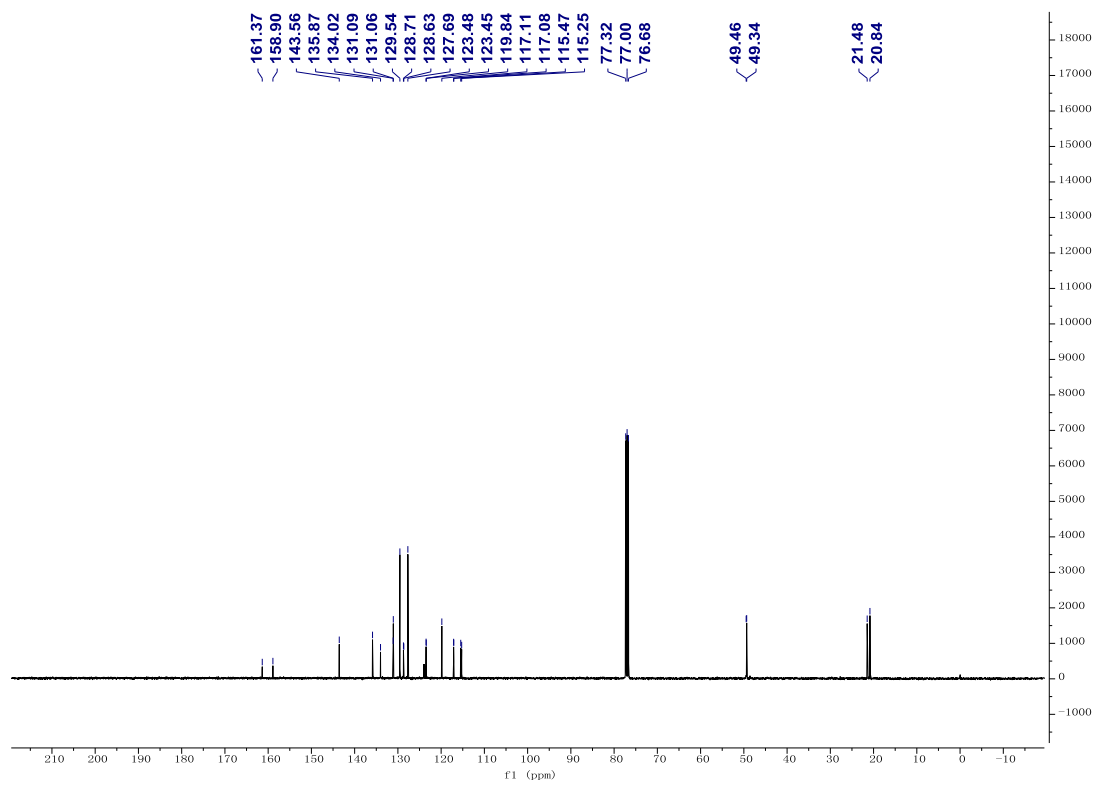

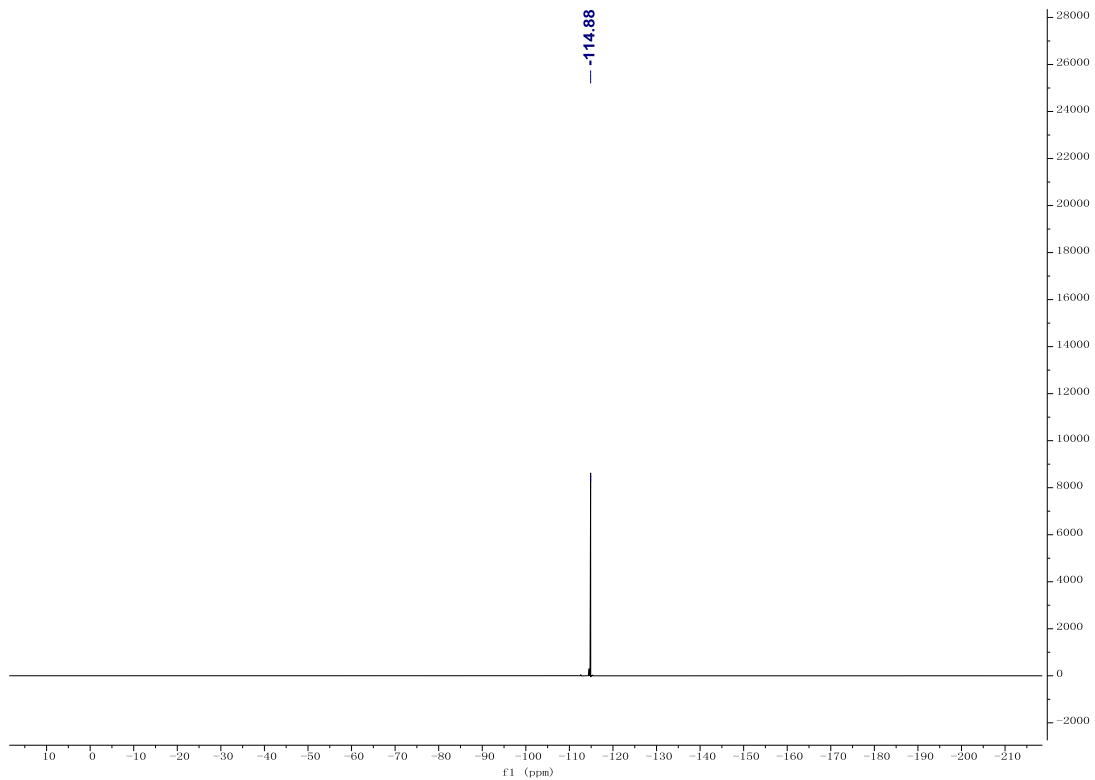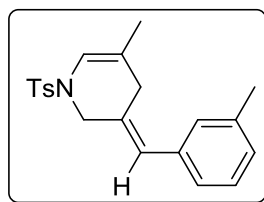

**(E)-6p**

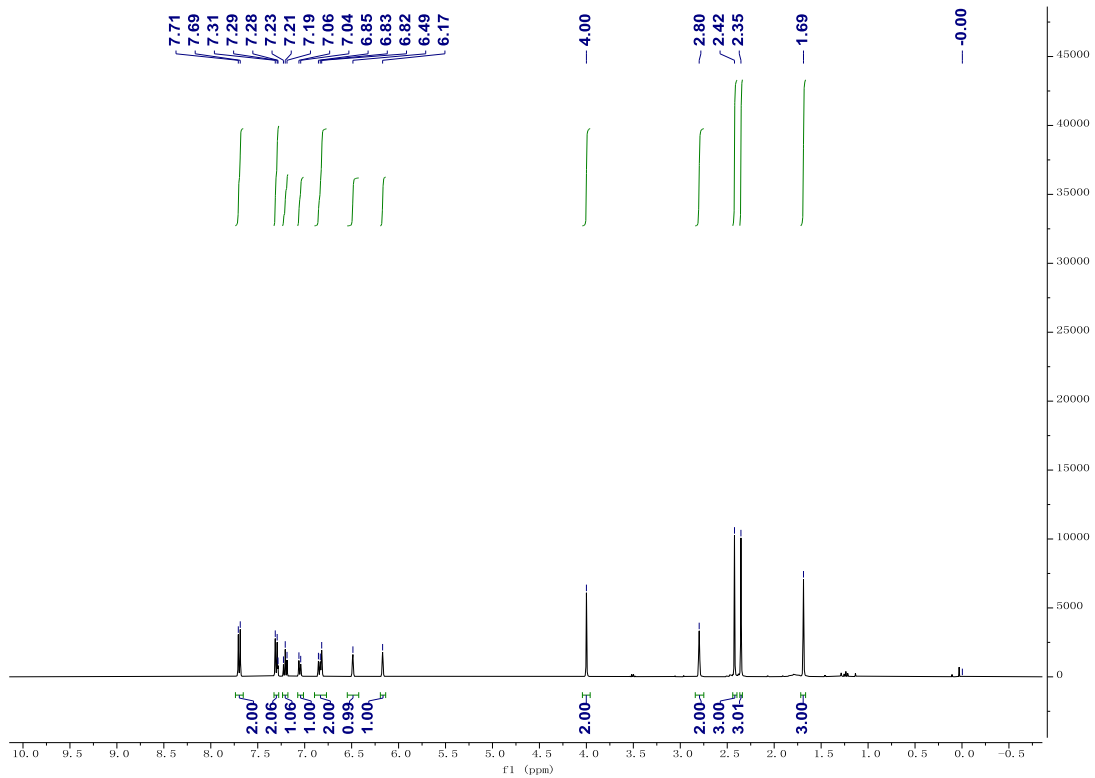

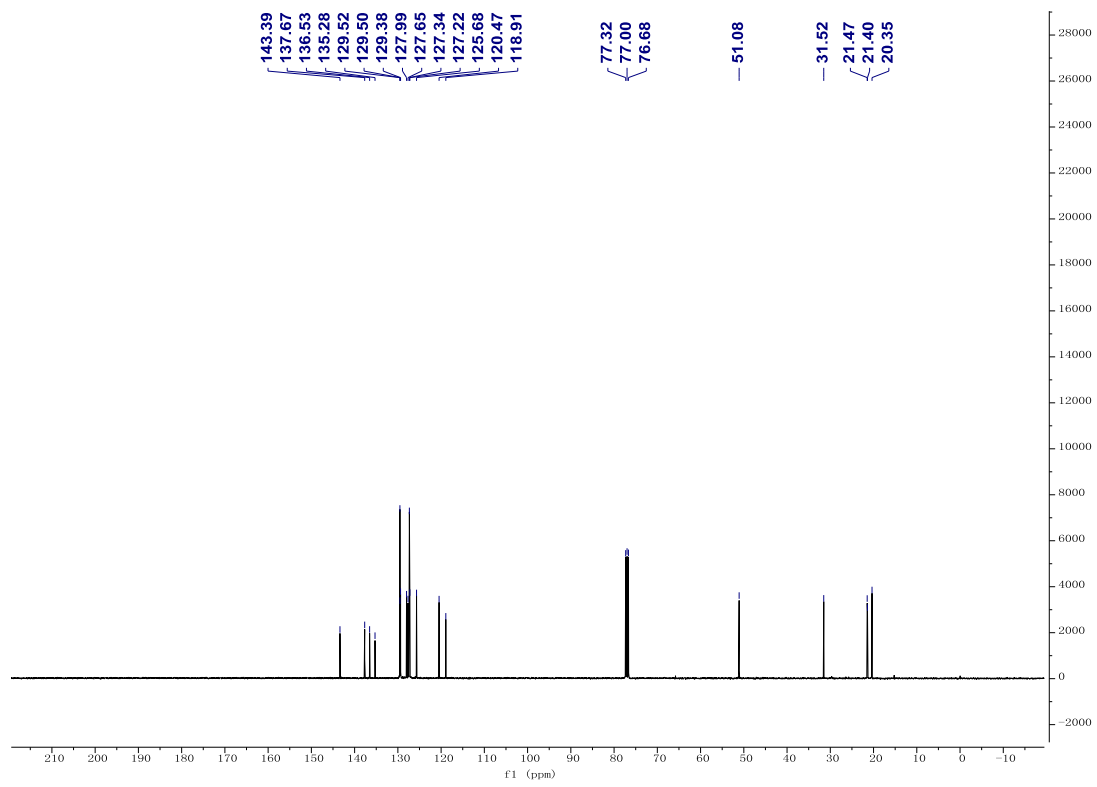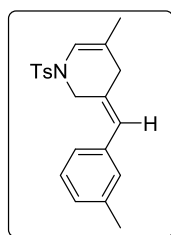

**(Z)-6p**

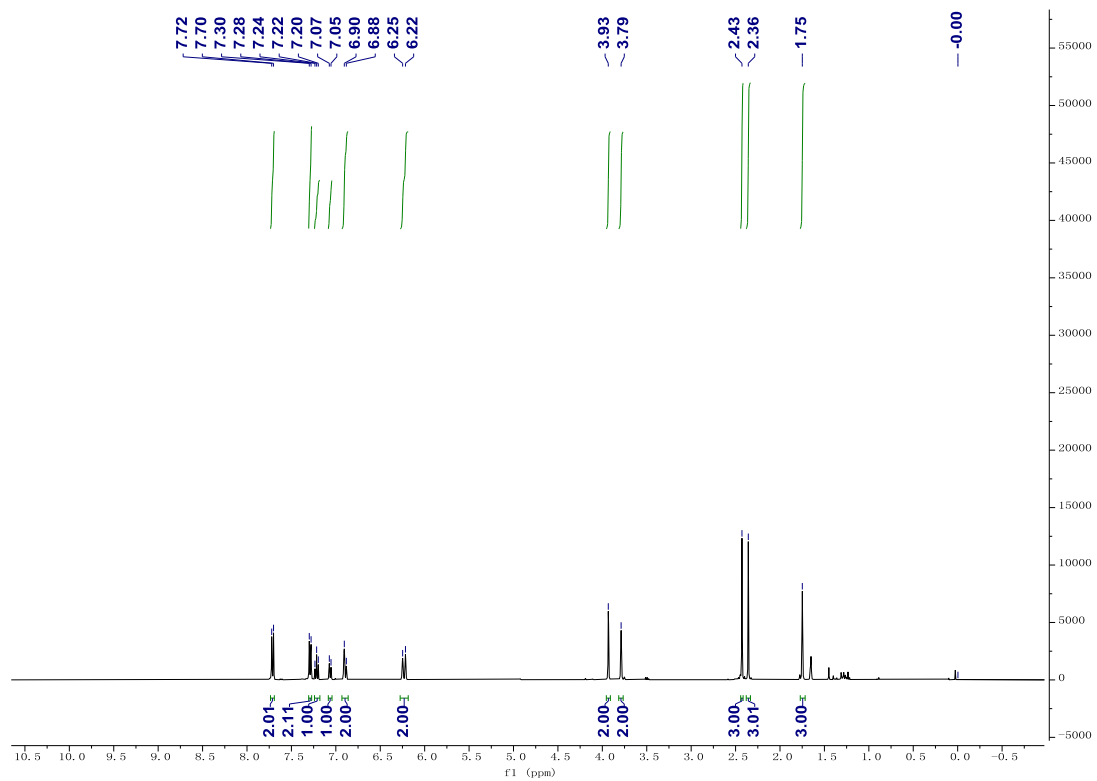



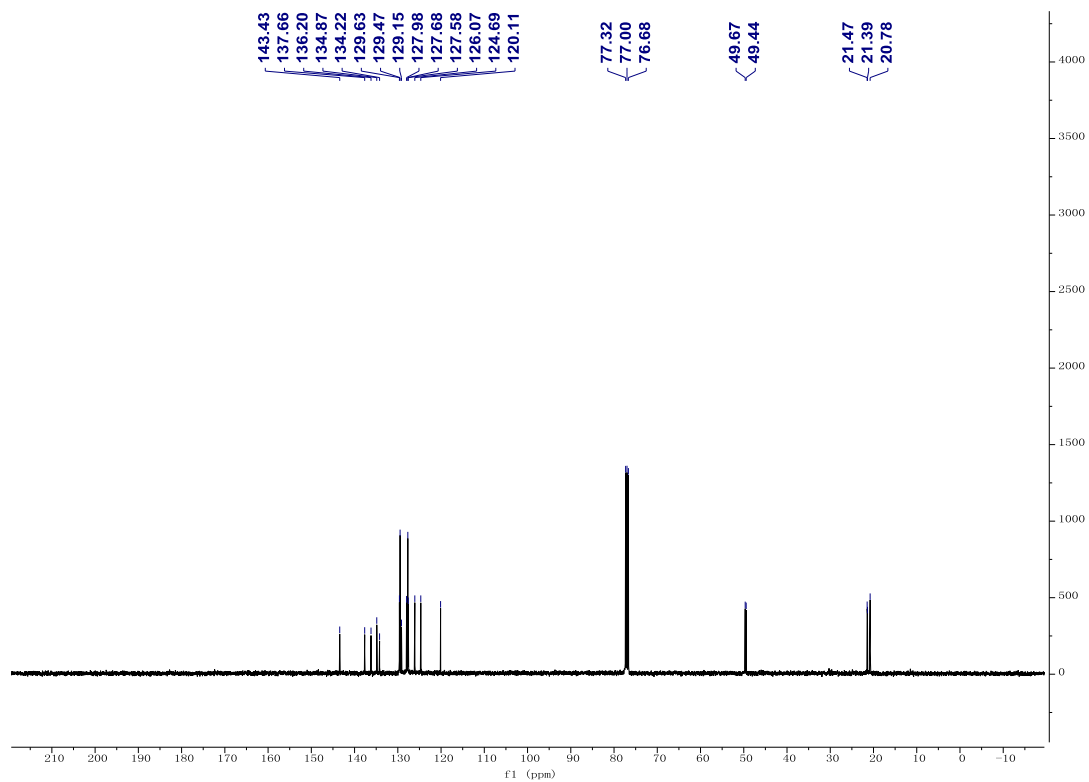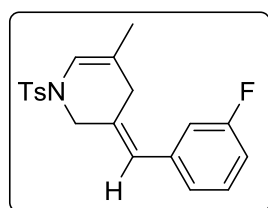

**(E)-6q**

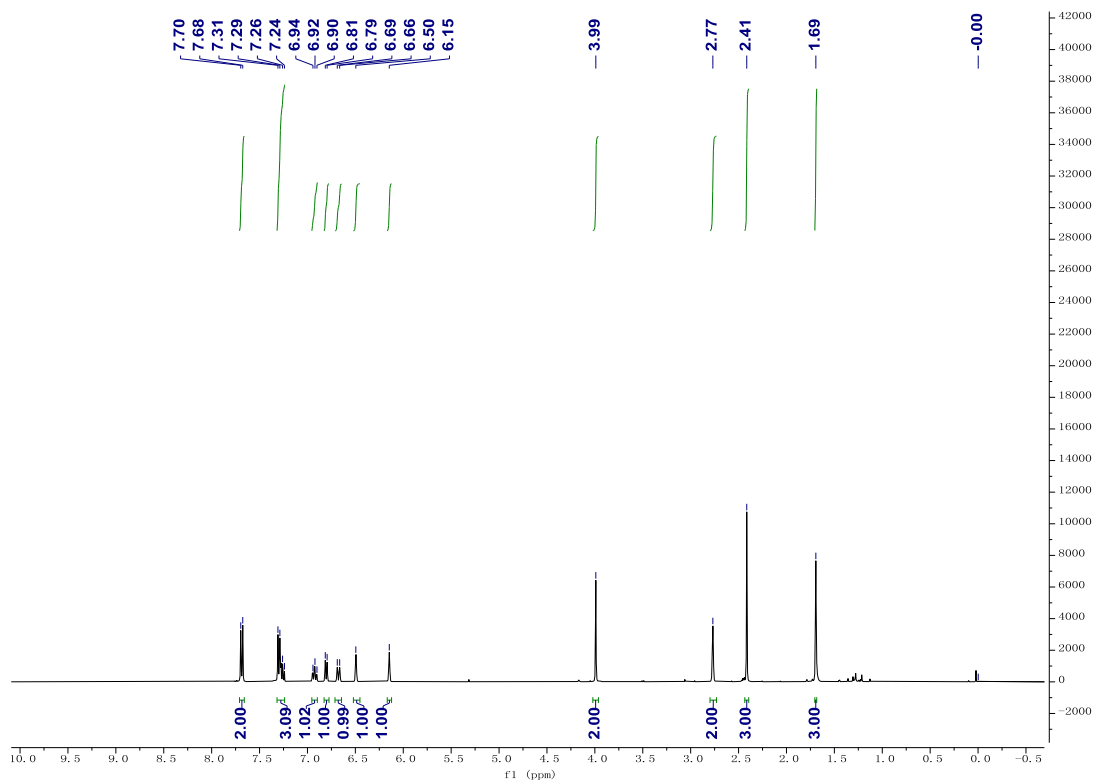

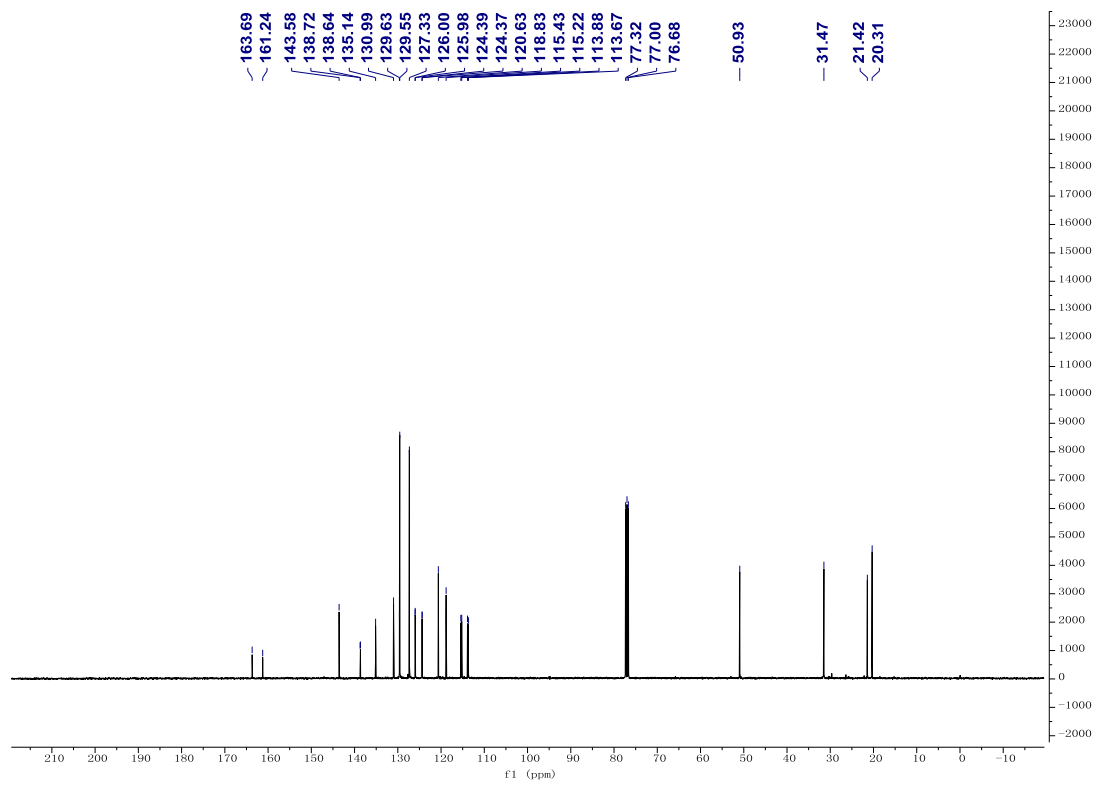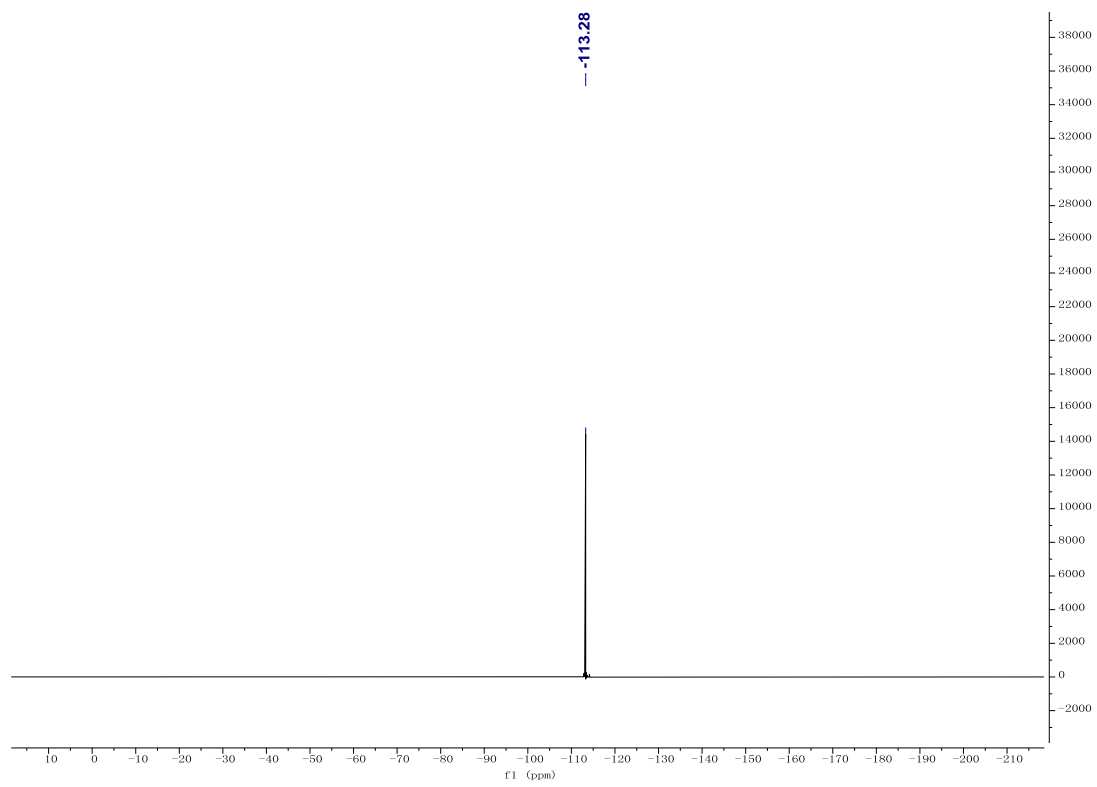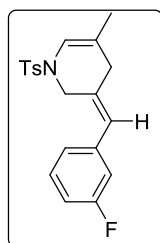

**(Z)-6q**

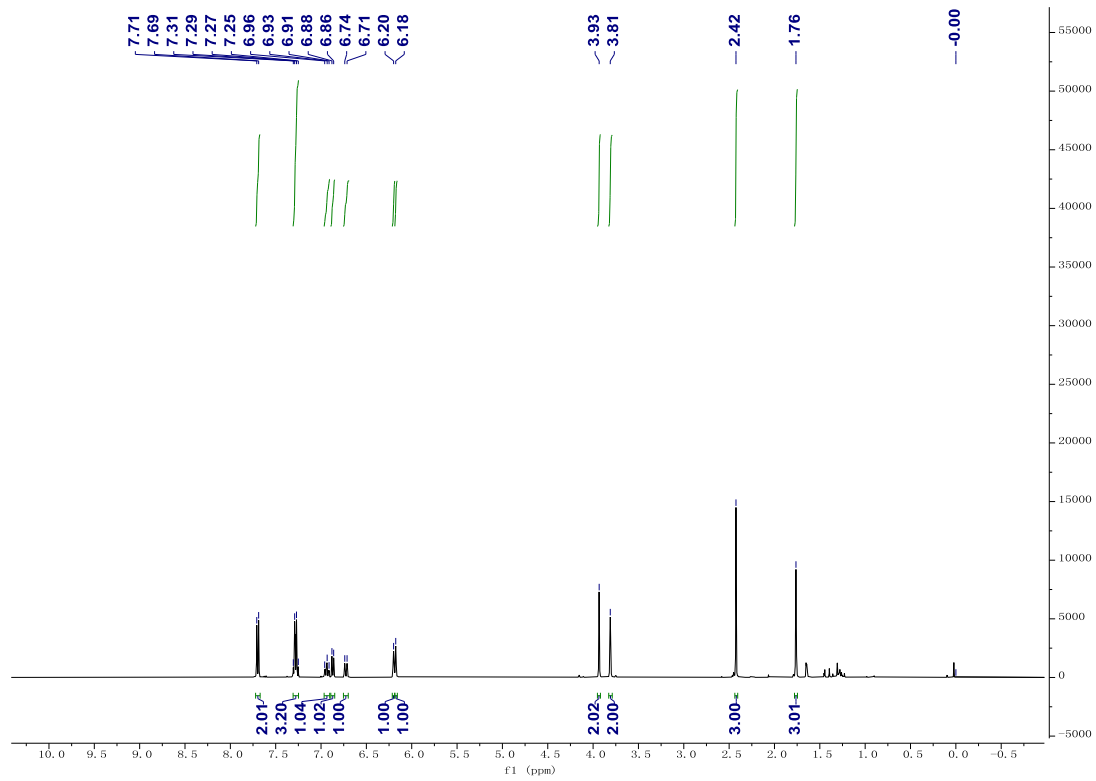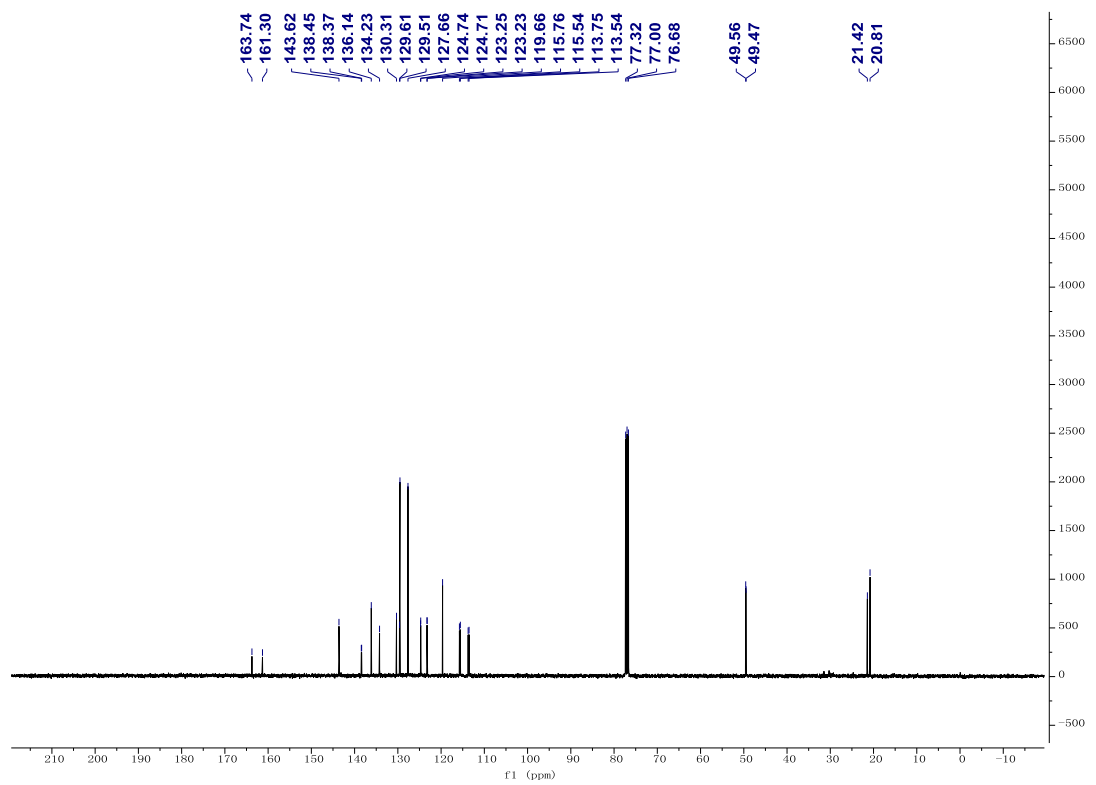

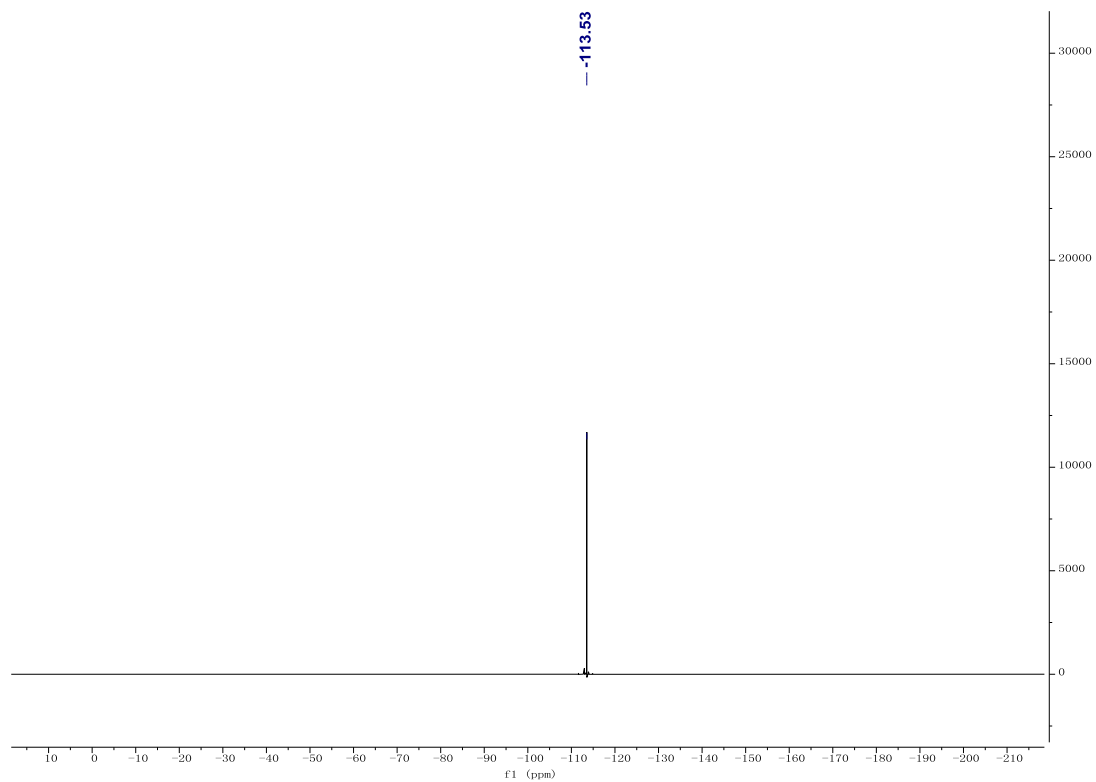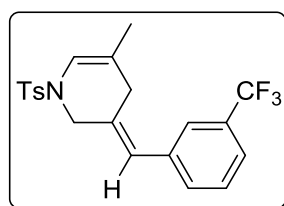

**(E)-6r**

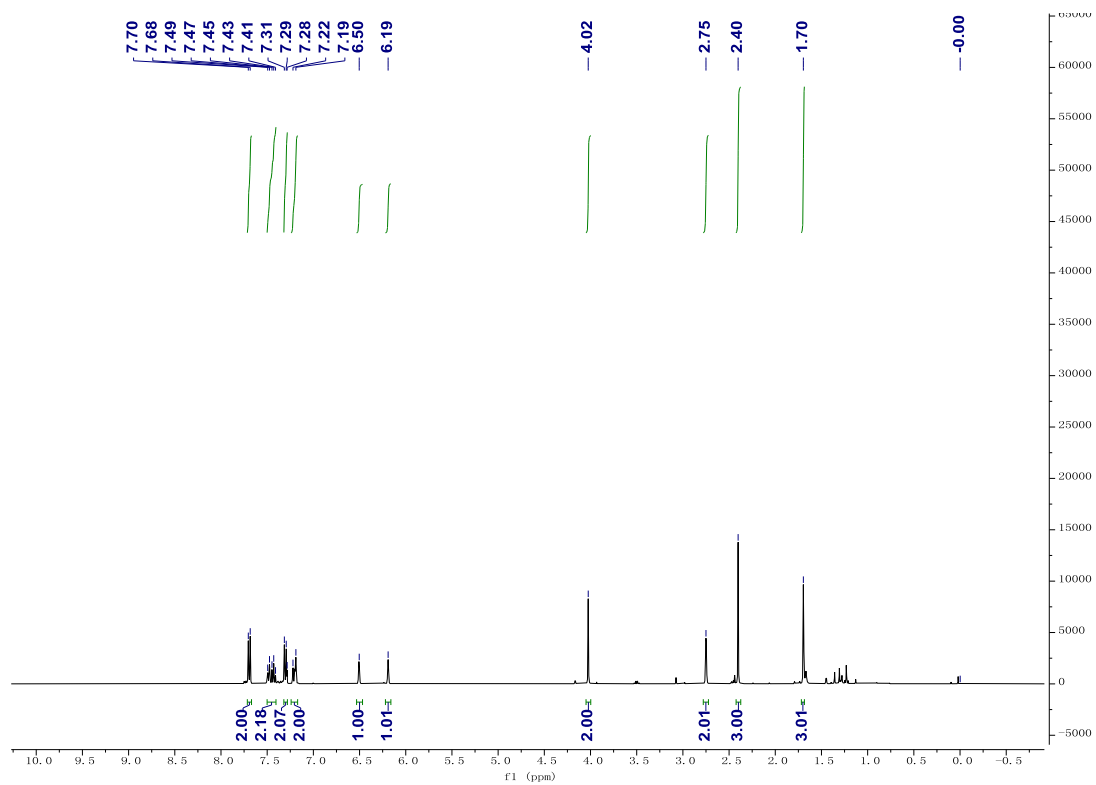

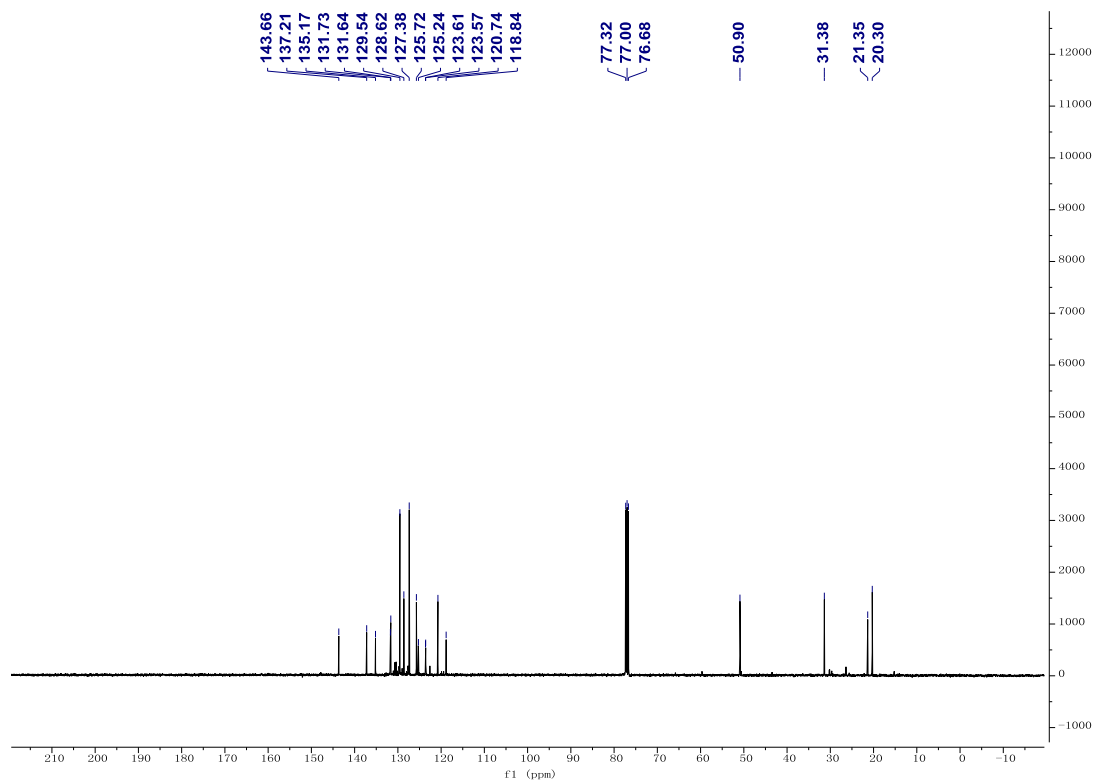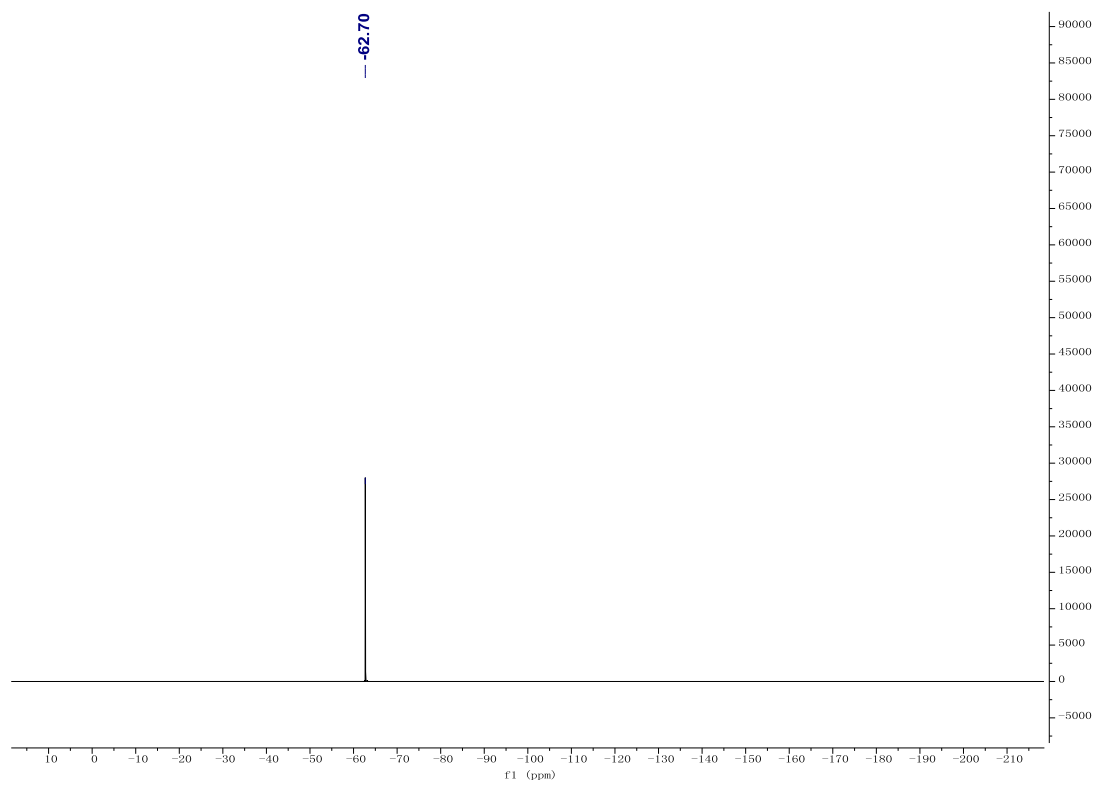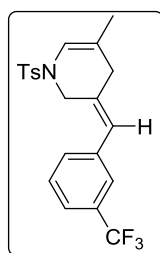

**(Z)-6r**

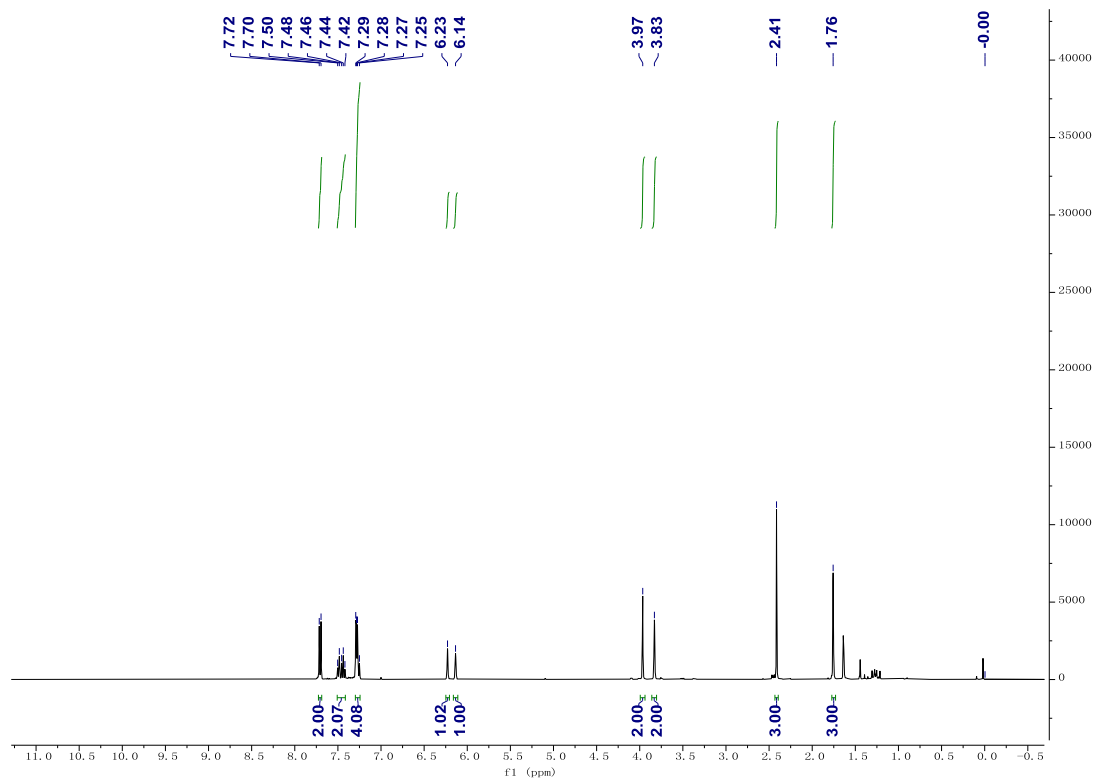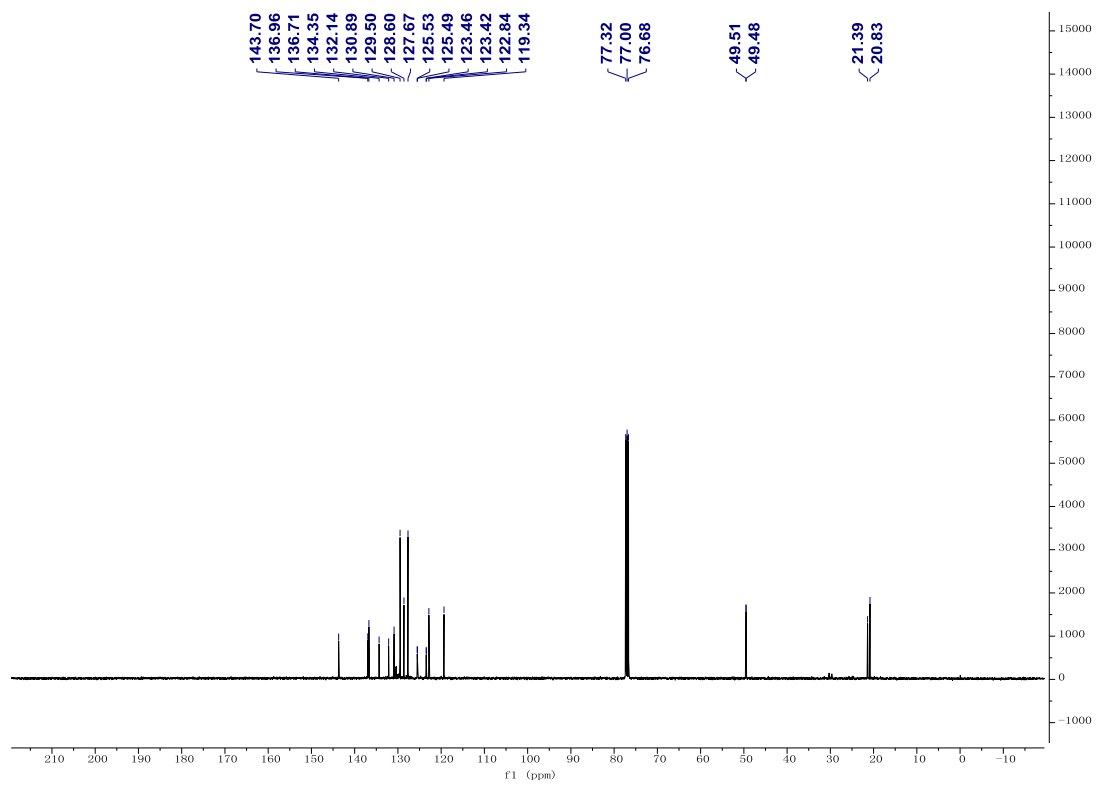

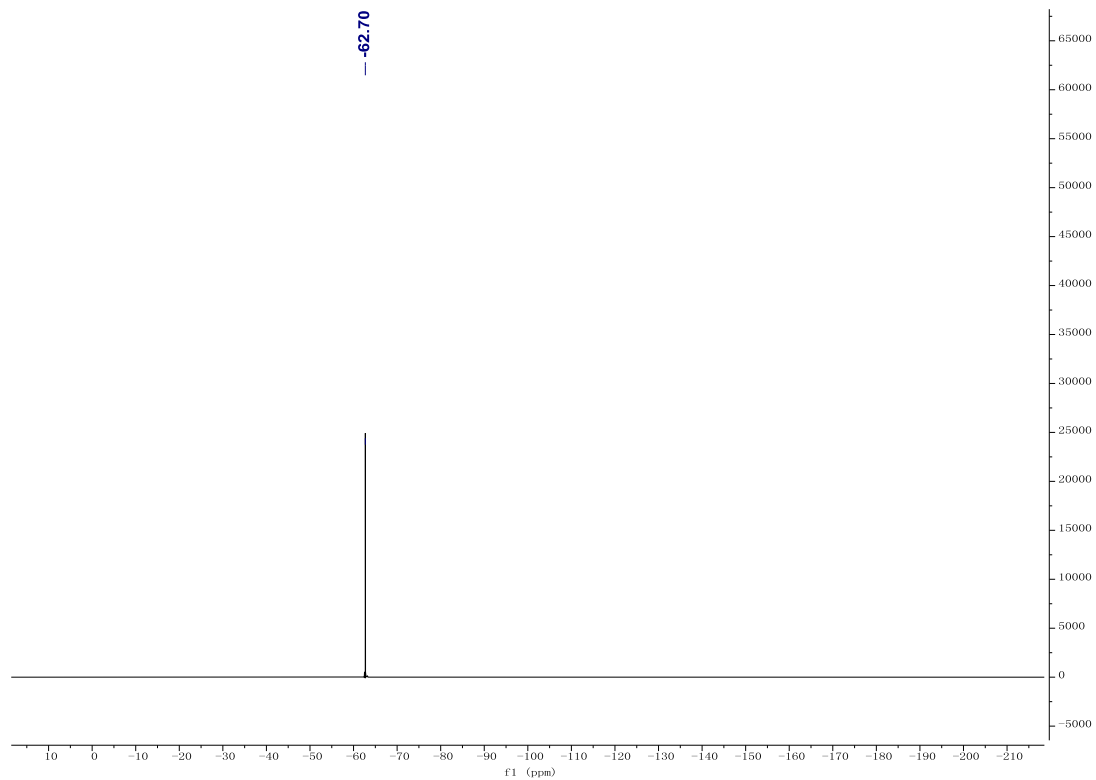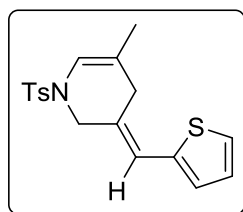

**(E)-6s**

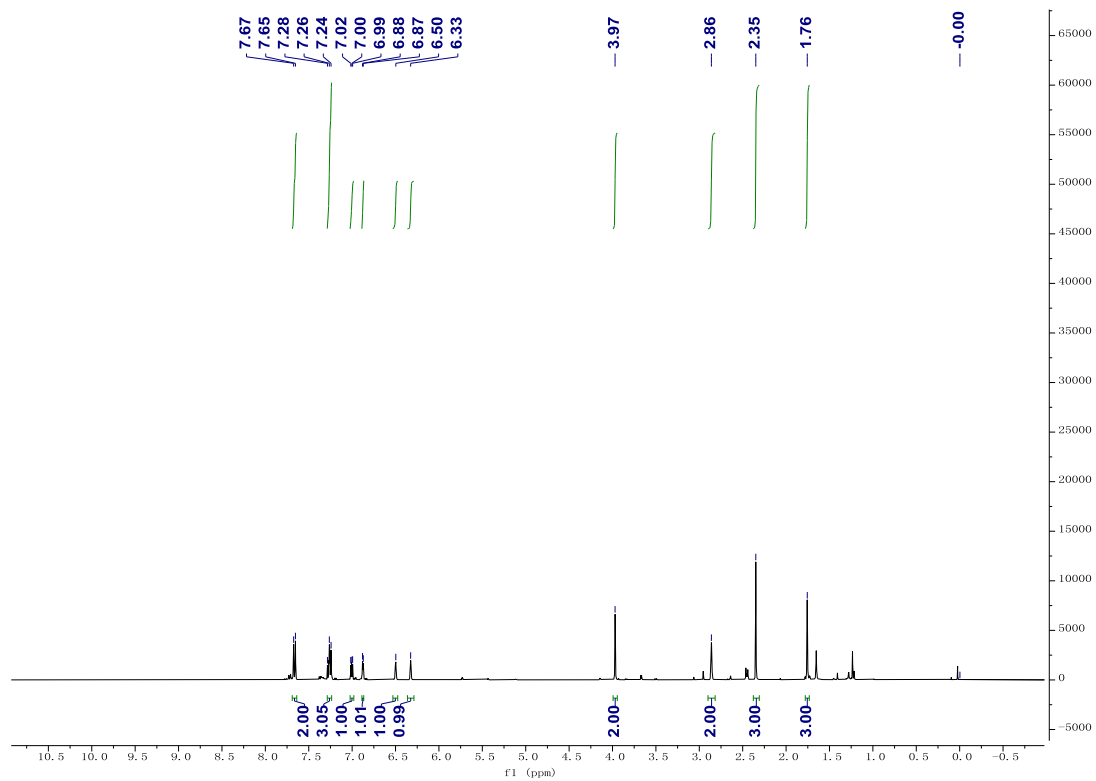

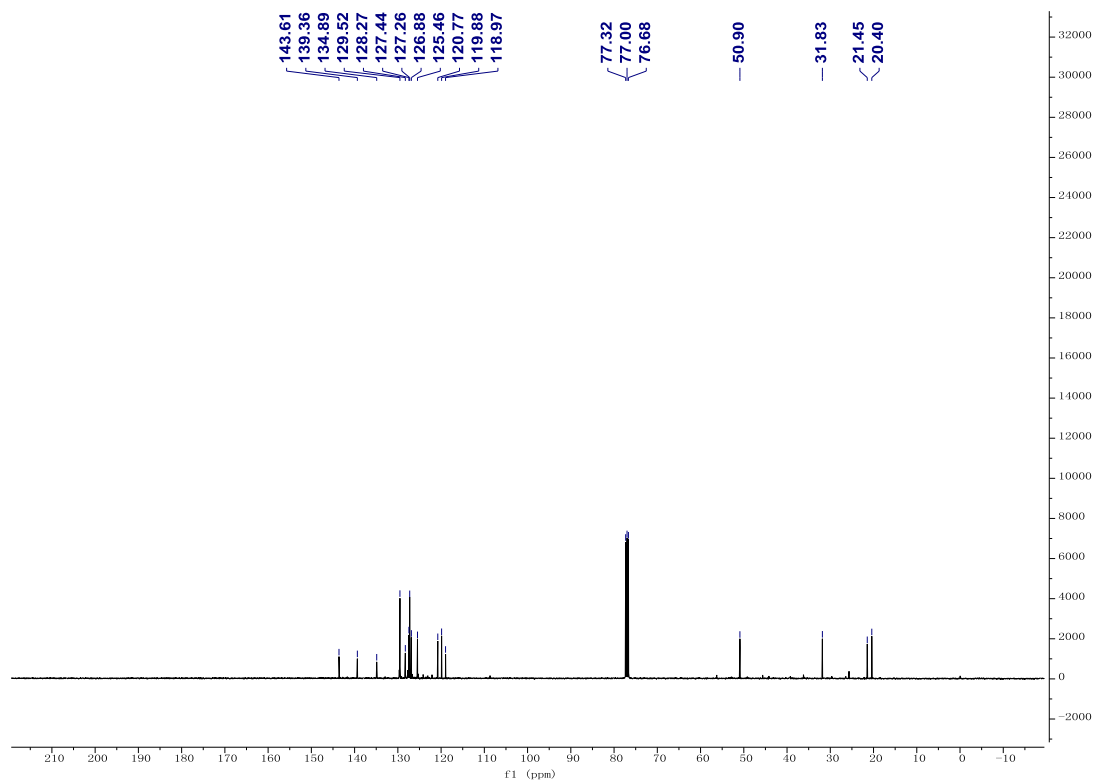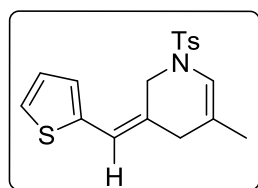

**(Z)-6s**

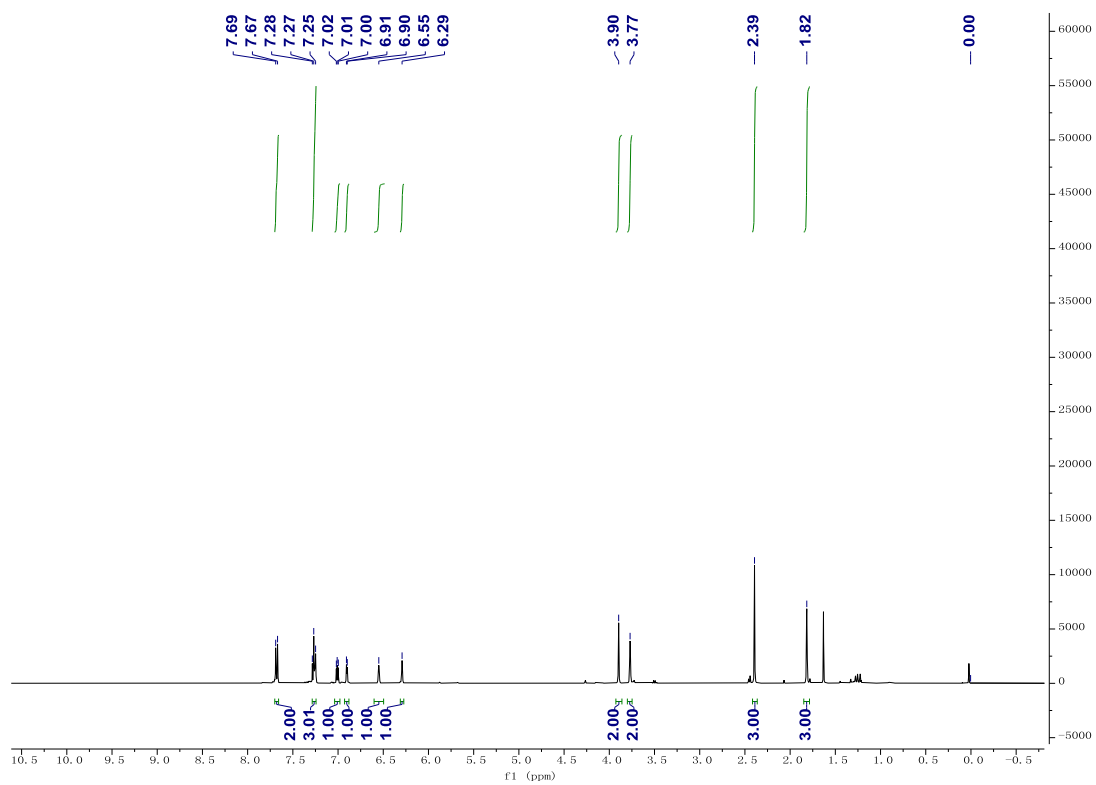



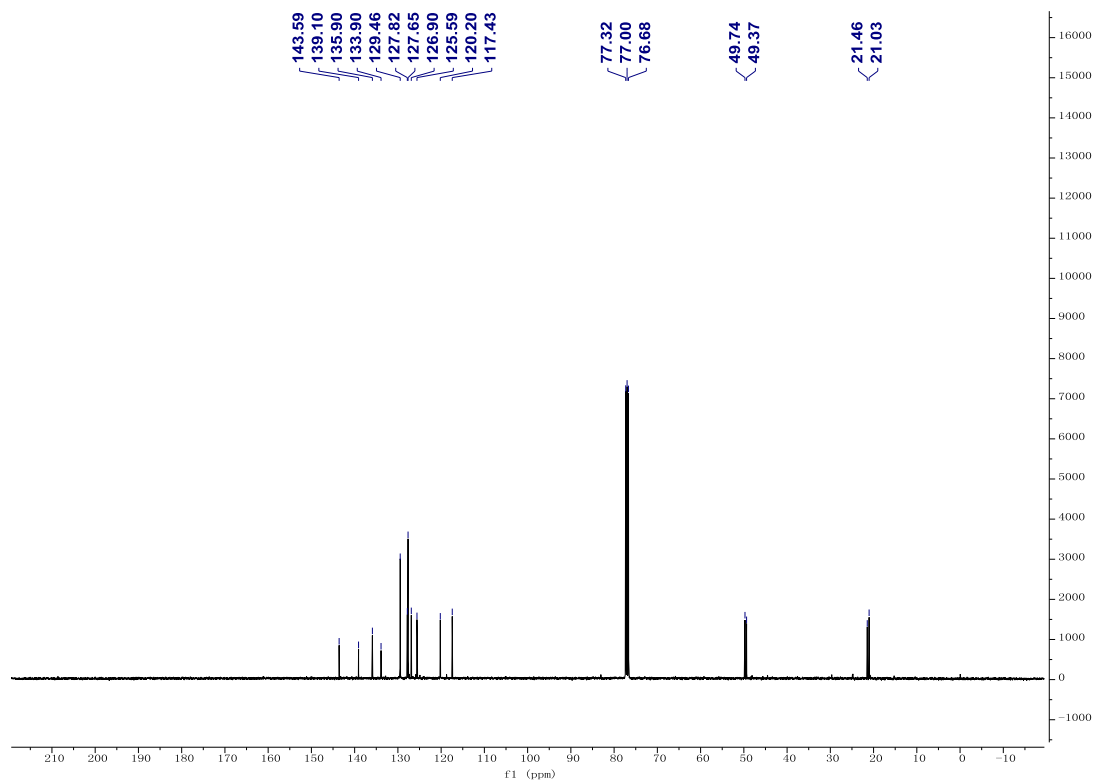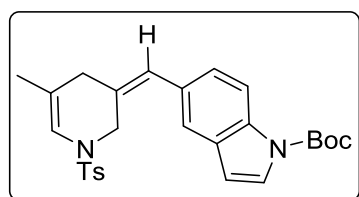

(Z)-6t

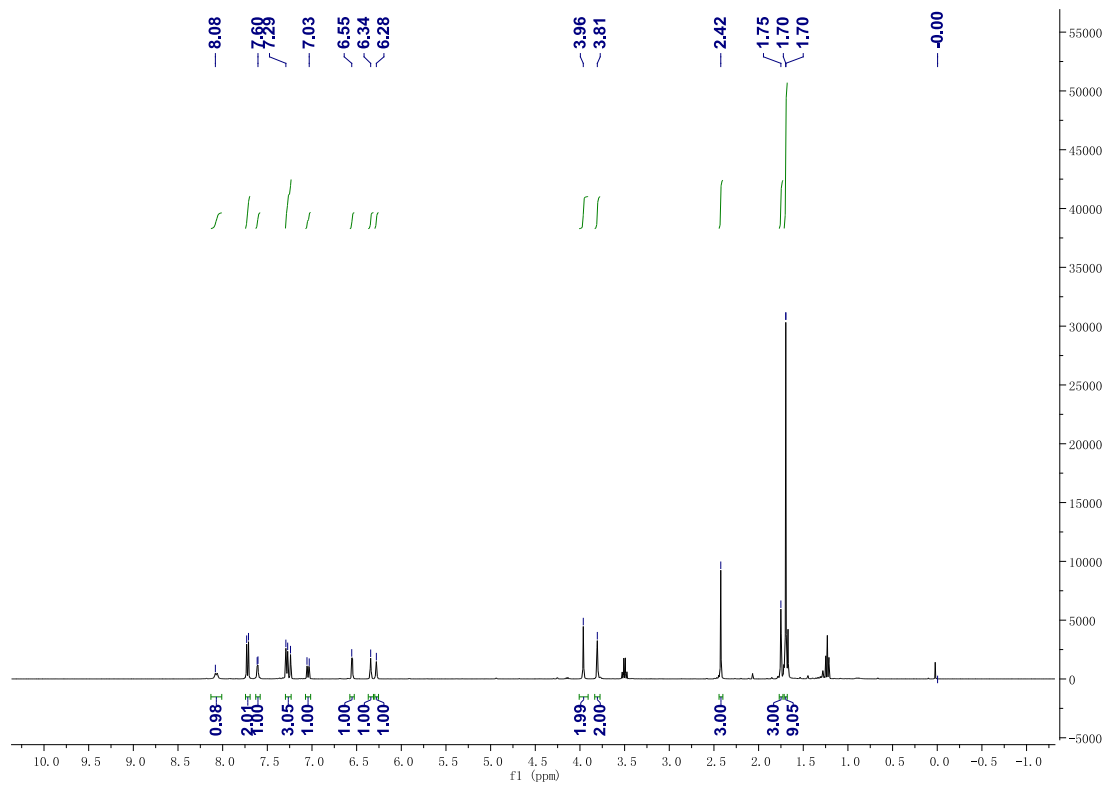

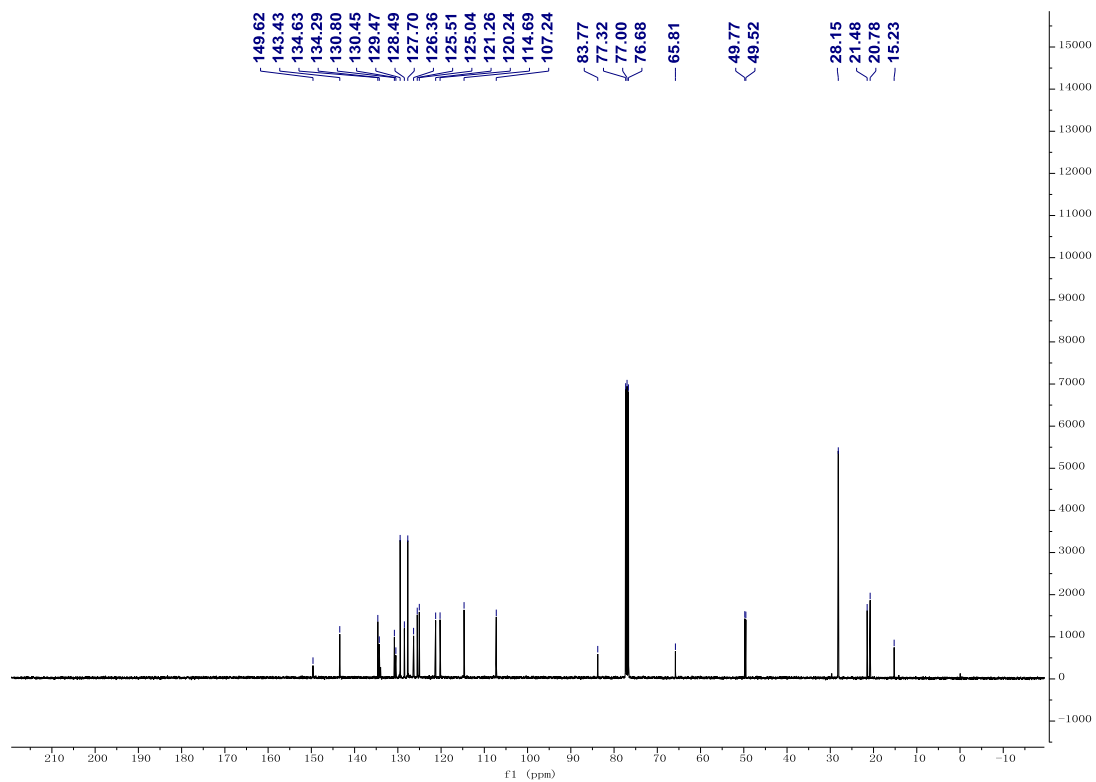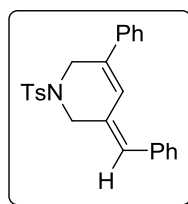

(E)-6u

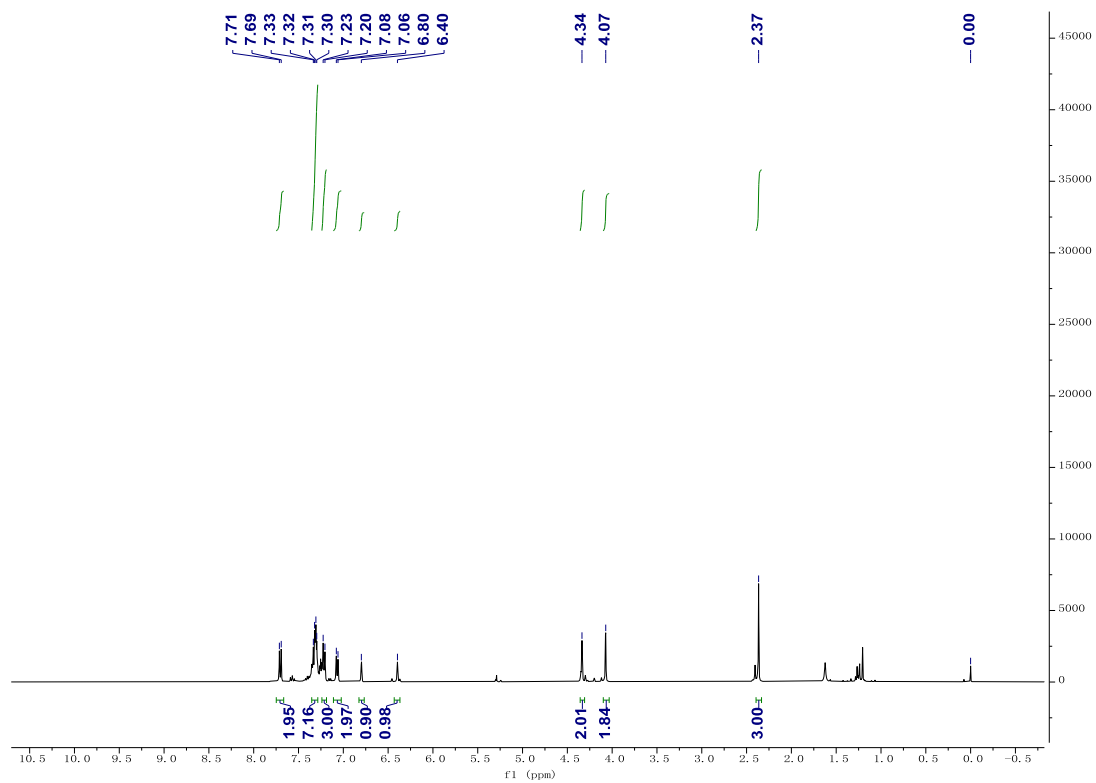

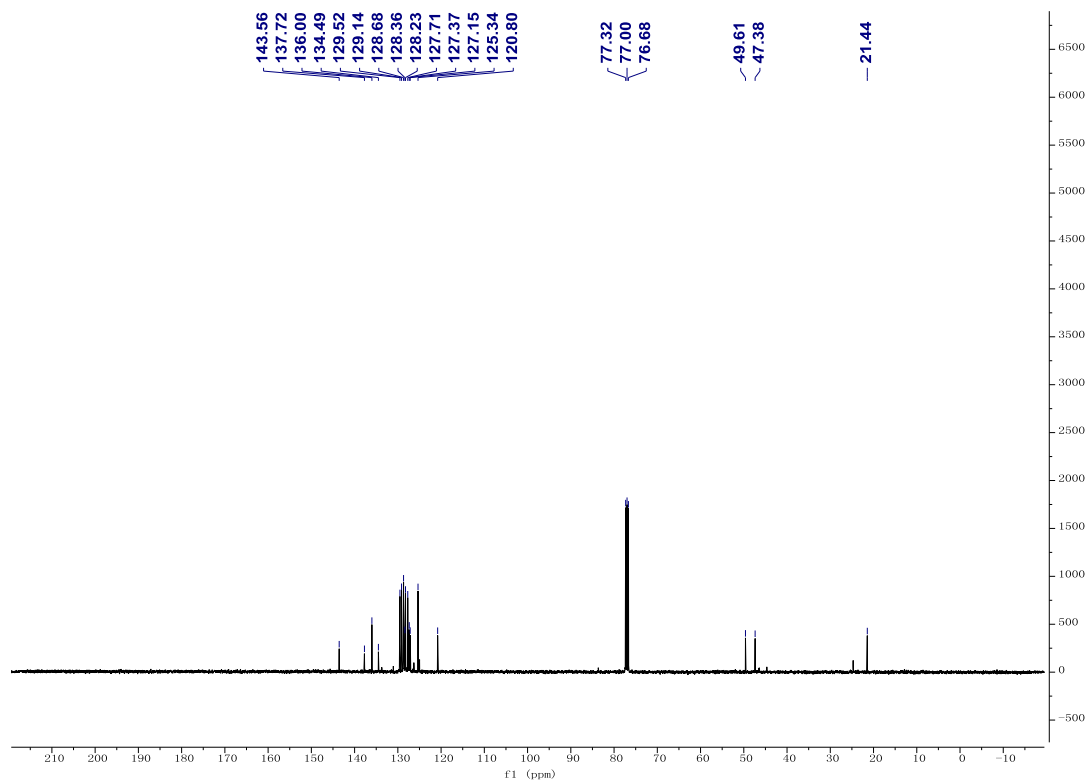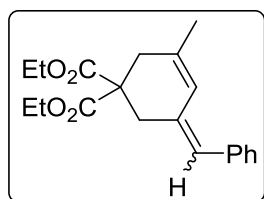

**6v**

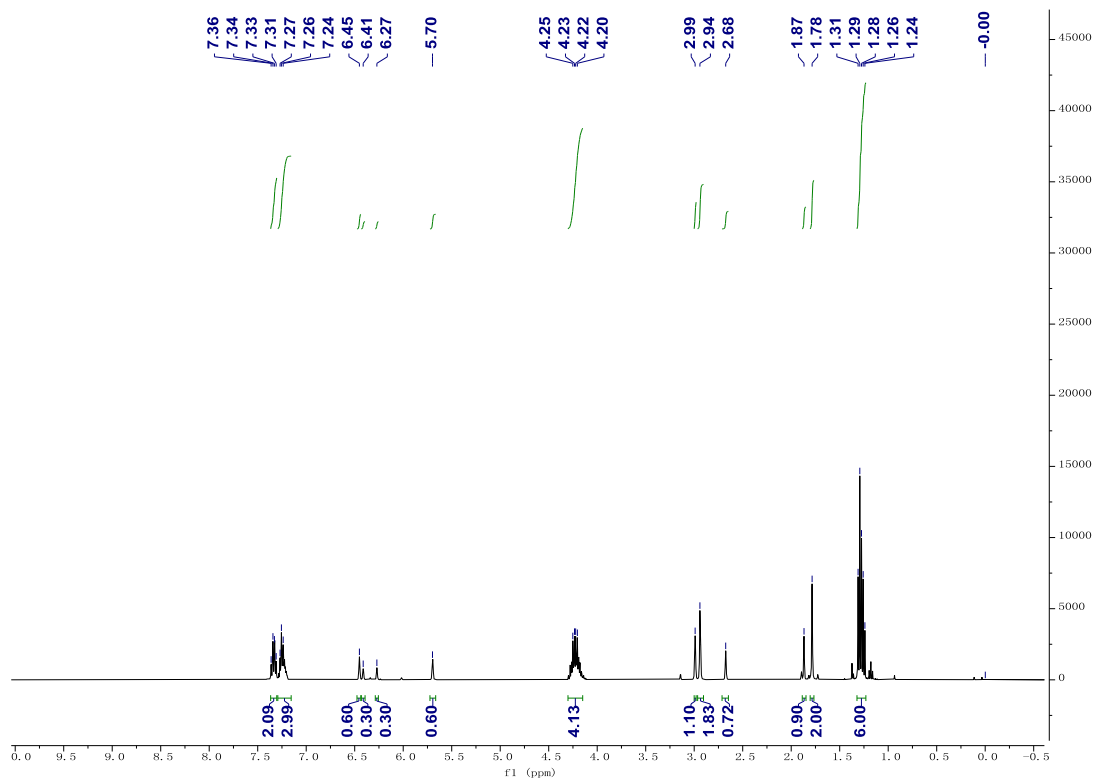

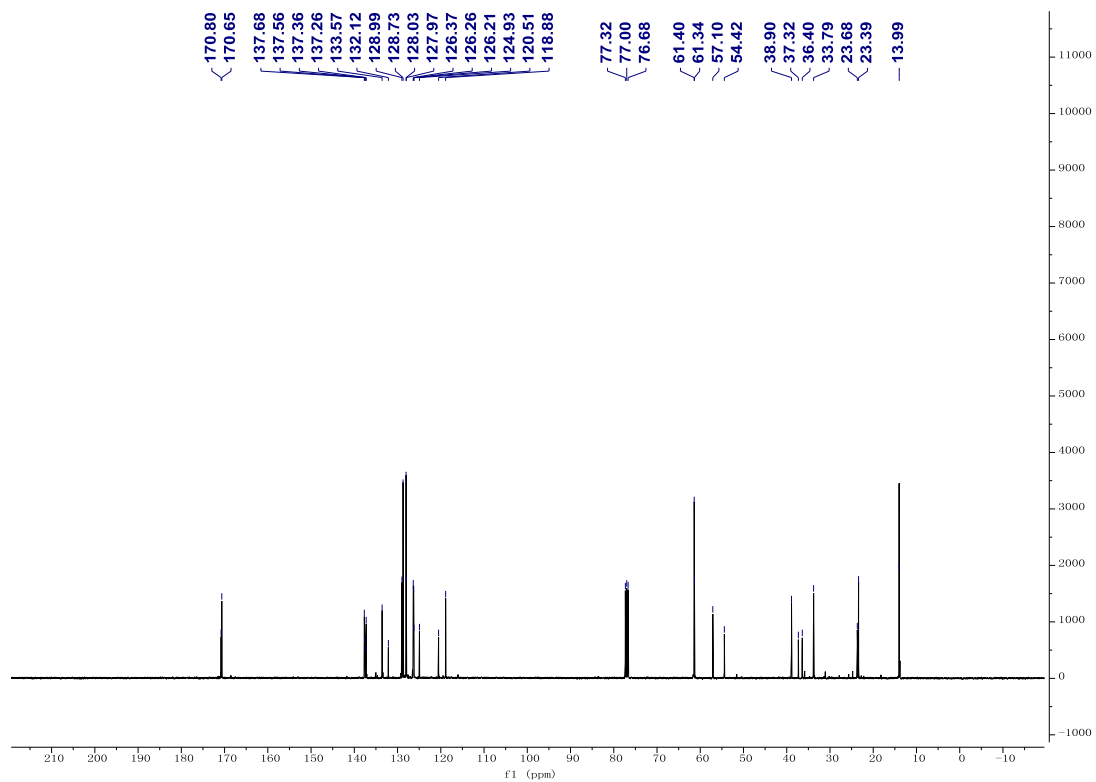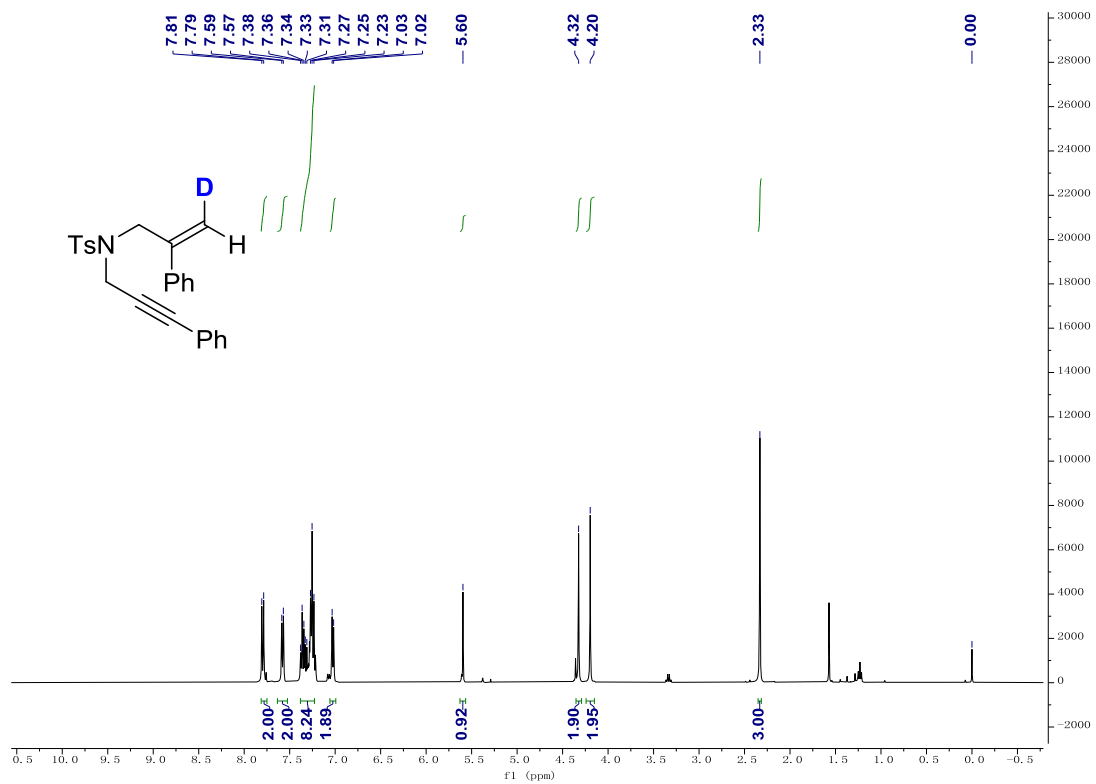

Supplement: d1qo00581b2.pdf [file d1qo00581b2.pdf]
