# Supplementary material for: Palladium-catalyzed divergent cycloisomerization of 1,6-enynes controlled by functional groups for the synthesis of pyrroles, cyclopentenes, and tetrahydropyridines
Source: Royal Society of Chemistry journal article supplement (doi:10.1039/d1qo00581b), 2021-01-01
Supplement: d1qo00581b1.pdf [file d1qo00581b1.pdf]

# Supporting Information

## Computational details

All density functional theory (DFT) calculations were conducted with the Gaussian 16 program. Geometry optimization was performed with B3LYP.<sup>[1]</sup> LANL2DZ+f basis set with ECP was used for Pd, the 6-31+G (d) basis set was used for other atoms.<sup>[2]</sup> Frequency analysis was conducted at the same level of theory to verify the stationary points to be energy minimum or a transition state and to obtain the thermal energy corrections. Single point energies were calculated with M06-L and a mixed basis set SDD for Pd and 6-311++G(d,p) for the other atoms.<sup>[3]</sup> Solvent effect (Solvent=1,2-dichloroethane) was calculated by using SMD solvation model<sup>[4]</sup>. The relative energies with ZPE corrections and free energies (at 298.15K) are in kcal/mol.

## References:

- [1] Gaussian 16, Revision A.03, M. J. Frisch, G. W. Trucks, H. B. Schlegel, G. E. Scuseria, M. A. Robb, J. R. Cheeseman, G. Scalmani, V. Barone, G. A. Petersson, H. Nakatsuji, X. Li, M. Caricato, A. V. Marenich, J. Bloino, B. G. Janesko, R. Gomperts, B. Mennucci, H. P. Hratchian, J. V. Ortiz, A. F. Izmaylov, J. L. Sonnenberg, D. Williams-Young, F. Ding, F. Lipparini, F. Egidi, J. Goings, B. Peng, A. Petrone, T. Henderson, D. Ranasinghe, V. G. Zakrzewski, J. Gao, N. Rega, G. Zheng, W. Liang, M. Hada, M. Ehara, K. Toyota, R. Fukuda, J. Hasegawa, M. Ishida, T. Nakajima, Y. Honda, O. Kitao, H. Nakai, T. Vreven, K. Throssell, J. A. Montgomery, Jr., J. E. Peralta, F. Ogliaro, M. J. Bearpark, J. J. Heyd, E. N. Brothers, K. N. Kudin, V. N. Staroverov, T. A. Keith, R. Kobayashi, J. Normand, K. Raghavachari, A. P. Rendell, J. C. Burant, S. S. Iyengar, J. Tomasi, M. Cossi, J. M. Millam, M. Klene, C. Adamo, R. Cammi, J. W. Ochterski, R. L. Martin, K. Morokuma, O. Farkas, J. B. Foresman, and D. J. Fox, Gaussian, Inc., Wallingford CT, 2016.
- [2] (a) A. D. Becke, *J. Chem. Phys.* 1993, **98**, 5648-5652; (b) C. Lee, W. Yang, R. G. Parr, *Phys. Rev. B*, 1988, **37**, 785-789.
- [3] P. J. Hay, W. R. Wadt, *J. Chem. Phys.* 1985, **82**, 270-283.
- [4] Y. Zhao, D. G. Truhlar, *J. Chem. Phys.* 2006, **125**, 194101.
- [5] A. V. Marenich, C. J. Cramer, D. G. Truhlar, *J. Phys. Chem. B*. 2009, **113**, 6378-6396.

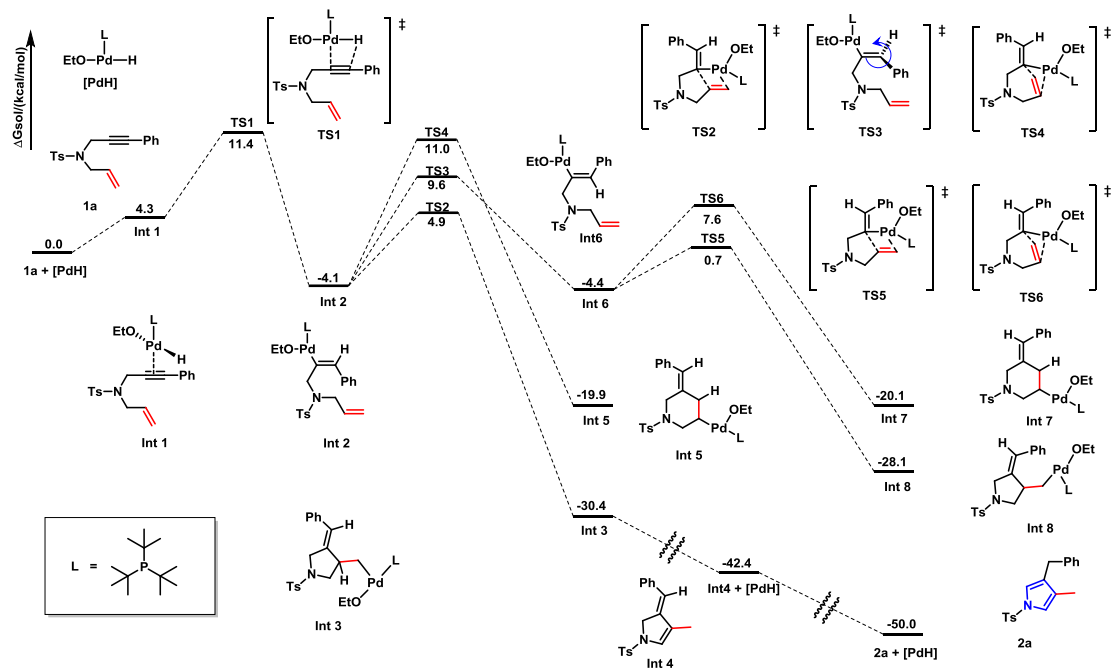

**Figure S1.** Gibbs energy profiles of cycloisomerization of 1a at the M06-L/6-311++G(d,p)/SDD/SMD(1,2-Dichloroethane)//B3LYP/6-31G+(d)/LANL2DZ+f level. (in kcal/mol)

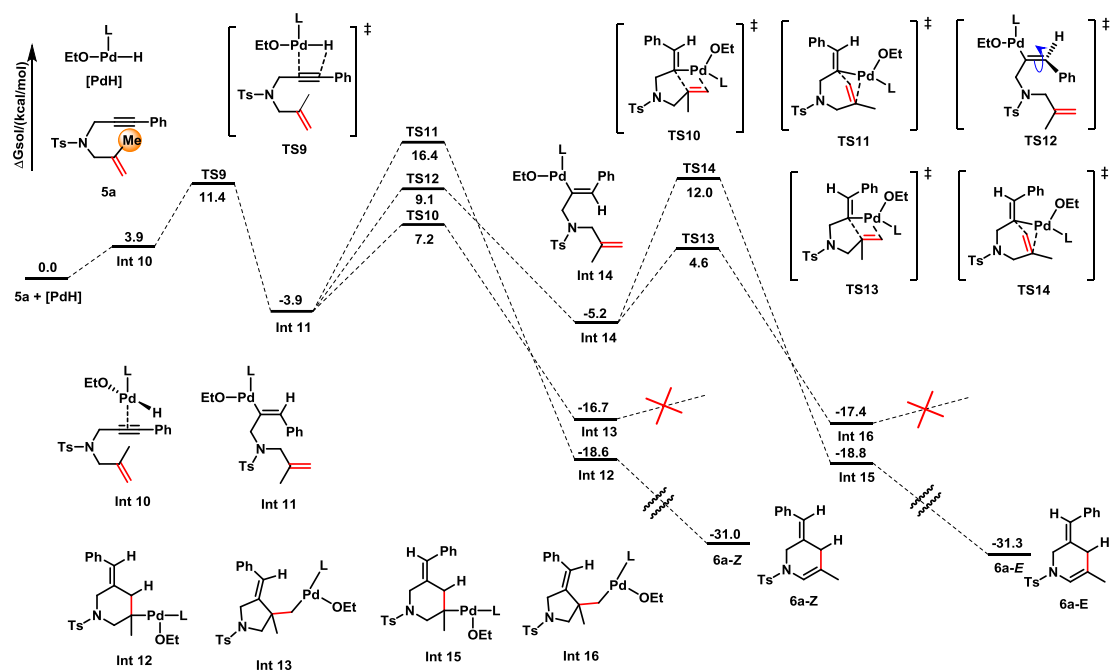

**Figure S2.** Gibbs energy profiles of cycloisomerization of 5a at the M06-L/6-311++G(d,p)/SDD/SMD(1,2-Dichloroethane)//B3LYP/6-31G+(d)/LANL2DZ+f level. (in kcal/mol)

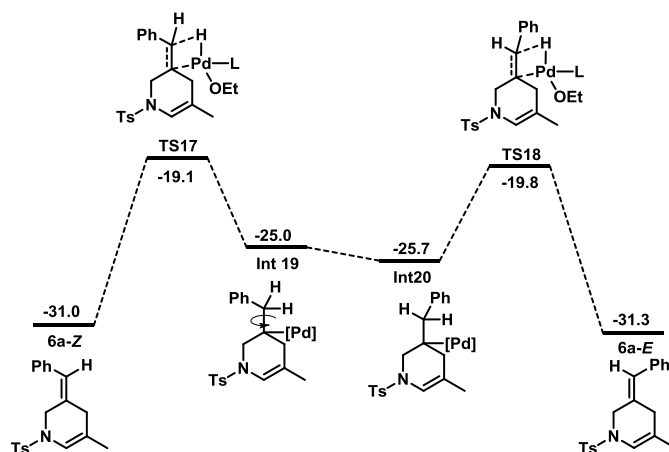

**Figure S3.** Gibbs energy profiles of isomerization process at the M06-L/6-311++G(d,p)/SDD/SMD(1,2-Dichloroethane)//B3LYP/6-31G+(d)/LANL2DZ+f level. (in kcal/mol). Palladium hydride coordinates with **6a-Z**, followed by alkene insertion via **TS17** to form **Int 19**. **Int 19** and **Int 20** can convert to each other via single bond rotation. With final  $\beta$ -H elimination via **TS18**, this pathway shows that **6a-Z** and **6a-E** can convert to each other.

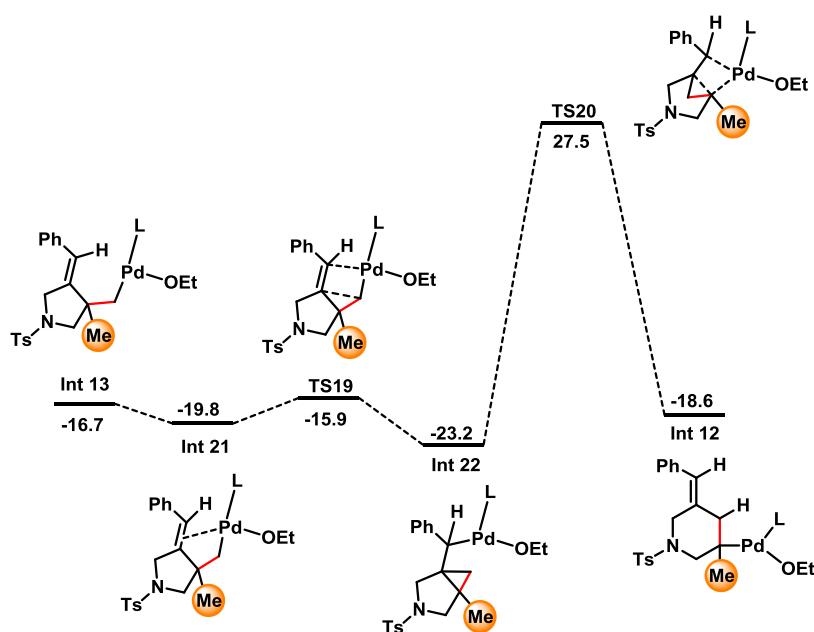

**Figure S4.** Gibbs energy profiles of an alternative process to form 6-membered rings at the M06-L/6-311++G(d,p)/SDD/SMD(1,2-Dichloroethane)//B3LYP/6-31G+(d)/LANL2DZ+f level. (in kcal/mol). The alkene moiety in **Int 13** complex to the palladium to give a cyclopropane intermediate **Int 22** via **TS19**. **Int 22** then undergoes a fragmentation via **TS20** which leads to **Int 12**. However, the barrier in this step is too high to achieve.

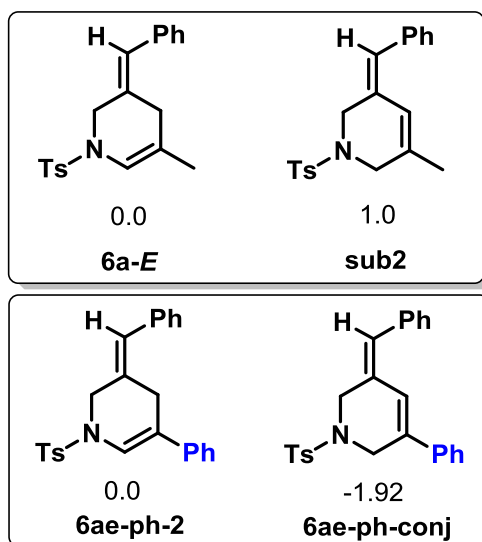

**Figure S5.** The relative free energies for R=Me and Ph. (kcal/mol)

### Cartesian Coordinates

|    |           |           |           |    |           |           |           |
|----|-----------|-----------|-----------|----|-----------|-----------|-----------|
|    |           |           |           | H  | -0.087777 | 0.355787  | -1.458992 |
| 1a |           |           |           | H  | -0.105511 | -1.249668 | -0.713422 |
| S  | -1.559508 | -0.603974 | 1.381685  | C  | 1.719063  | -0.248016 | -0.545657 |
| O  | -1.843253 | 0.048439  | 2.663899  | C  | 2.930729  | -0.312610 | -0.537038 |
| O  | -1.105554 | -1.995939 | 1.299862  | C  | 4.359218  | -0.379750 | -0.504484 |
| C  | -3.043838 | -0.465081 | 0.369887  | C  | 5.014485  | -1.149918 | 0.477503  |
| C  | -3.938264 | 0.586183  | 0.593245  | C  | 5.133706  | 0.321104  | -1.450648 |
| C  | -5.071369 | 0.700811  | -0.212375 | C  | 6.407125  | -1.212101 | 0.510435  |
| C  | -5.330681 | -0.219065 | -1.240468 | H  | 4.420993  | -1.692649 | 1.207392  |
| C  | -4.424664 | -1.273199 | -1.432747 | C  | 6.525971  | 0.251560  | -1.412613 |
| C  | -3.285660 | -1.403906 | -0.637165 | H  | 4.633104  | 0.915542  | -2.209506 |
| H  | -3.764396 | 1.284467  | 1.405649  | C  | 7.167434  | -0.513553 | -0.433143 |
| H  | -5.772659 | 1.511868  | -0.029125 | H  | 6.900129  | -1.808641 | 1.273754  |
| H  | -4.618255 | -2.012210 | -2.206999 | H  | 7.111773  | 0.796323  | -2.148689 |
| H  | -2.608769 | -2.241395 | -0.772596 | H  | 8.252786  | -0.565259 | -0.405491 |
| C  | -6.548003 | -0.071374 | -2.122763 | H  | -1.129931 | 2.143418  | -0.161996 |
| H  | -6.875816 | -1.038235 | -2.518962 | H  | -1.063030 | 2.015296  | 1.612696  |
| H  | -7.386403 | 0.375504  | -1.577683 | H  | 1.504809  | 2.189572  | 1.469055  |
| H  | -6.332654 | 0.578920  | -2.981492 | H  | 0.410401  | 3.880146  | -0.872569 |
| N  | -0.351011 | 0.328370  | 0.643311  | H  | 2.042568  | 4.069729  | -0.019013 |
| C  | -0.521038 | 1.793977  | 0.688357  |    |           |           |           |
| C  | 0.797947  | 2.520213  | 0.709744  |    |           |           |           |
| C  | 1.098012  | 3.538647  | -0.100230 | 5a |           |           |           |
| C  | 0.254541  | -0.224508 | -0.588545 | S  | -1.620309 | 0.037540  | 1.444453  |

|   |           |           |           |    |           |           |           |
|---|-----------|-----------|-----------|----|-----------|-----------|-----------|
| O | -1.891517 | 1.224522  | 2.262022  |    |           |           |           |
| O | -1.163079 | -1.225175 | 2.034031  |    |           |           |           |
| C | -3.118102 | -0.321830 | 0.509476  | 3a |           |           |           |
| C | -4.015140 | 0.709452  | 0.214511  | C  | 0.969812  | -1.560793 | 1.019240  |
| C | -5.158433 | 0.426444  | -0.532836 | C  | 1.268877  | -3.008312 | 0.712958  |
| C | -5.426147 | -0.872928 | -0.991732 | C  | 1.835847  | -3.570833 | -0.360273 |
| C | -4.517853 | -1.892005 | -0.667446 | C  | 0.181750  | -0.690110 | -1.286733 |
| C | -3.368335 | -1.627727 | 0.078479  | H  | 0.356509  | -1.680495 | -1.718163 |
| H | -3.835050 | 1.711149  | 0.591219  | H  | 0.435593  | 0.036057  | -2.065577 |
| H | -5.861231 | 1.227526  | -0.750967 | C  | -1.225752 | -0.553924 | -0.912187 |
| H | -4.717542 | -2.911226 | -0.990524 | C  | -2.389681 | -0.426427 | -0.589998 |
| H | -2.689674 | -2.429191 | 0.352243  | C  | -3.759998 | -0.276473 | -0.205431 |
| C | -6.655063 | -1.162986 | -1.821043 | C  | -4.093299 | 0.300748  | 1.036659  |
| H | -6.974346 | -2.205002 | -1.714018 | C  | -4.797374 | -0.702591 | -1.058863 |
| H | -7.493257 | -0.518609 | -1.534586 | C  | -5.429015 | 0.445267  | 1.410667  |
| H | -6.458112 | -0.987983 | -2.887457 | H  | -3.297087 | 0.630015  | 1.698128  |
| N | -0.424350 | 0.498538  | 0.336601  | C  | -6.130541 | -0.553624 | -0.677462 |
| C | -0.580392 | 1.813313  | -0.318629 | H  | -4.546227 | -1.148661 | -2.016872 |
| C | 0.736467  | 2.540329  | -0.513826 | C  | -6.452013 | 0.019903  | 0.556969  |
| C | 1.102100  | 2.951513  | -1.734653 | H  | -5.671711 | 0.891327  | 2.371894  |
| C | 0.169670  | -0.578088 | -0.486063 | H  | -6.920645 | -0.886854 | -1.345680 |
| H | -0.161339 | -0.462489 | -1.529397 | H  | -7.492012 | 0.134081  | 0.851620  |
| H | -0.213871 | -1.535969 | -0.123292 | C  | 1.158146  | -0.492157 | -0.084661 |
| C | 1.633610  | -0.615374 | -0.428253 | C  | 0.888681  | 0.894318  | 0.546221  |
| C | 2.843174  | -0.702552 | -0.387928 | C  | 2.601849  | -0.474497 | -0.621874 |
| C | 4.270003  | -0.788548 | -0.328546 | O  | 1.116475  | 1.875623  | -0.347529 |
| C | 5.057229  | -0.438677 | -1.443932 | O  | 2.920594  | -0.646220 | -1.779997 |
| C | 4.910525  | -1.225764 | 0.848382  | O  | 0.511295  | 1.086786  | 1.681111  |
| C | 6.447601  | -0.524847 | -1.380355 | O  | 3.478270  | -0.238187 | 0.370841  |
| H | 4.567588  | -0.101101 | -2.352801 | C  | 0.868263  | 3.234775  | 0.099004  |
| C | 6.301456  | -1.307118 | 0.904776  | H  | -0.175853 | 3.304949  | 0.418962  |
| H | 4.307252  | -1.497227 | 1.709761  | H  | 1.504304  | 3.432976  | 0.967596  |
| C | 7.074399  | -0.958275 | -0.207518 | C  | 1.175288  | 4.161249  | -1.062141 |
| H | 7.043447  | -0.252503 | -2.247838 | H  | 0.532976  | 3.941371  | -1.921406 |
| H | 6.783175  | -1.644661 | 1.818877  | H  | 0.999831  | 5.199813  | -0.758084 |
| H | 8.158351  | -1.023813 | -0.160651 | H  | 2.219968  | 4.066626  | -1.377244 |
| H | -1.093524 | 1.695485  | -1.285558 | C  | 4.883581  | -0.203087 | 0.006306  |
| H | -1.215420 | 2.416811  | 0.336843  | H  | 5.144963  | -1.165573 | -0.444209 |
| H | 0.503194  | 2.734282  | -2.616883 | H  | 5.023253  | 0.575529  | -0.750215 |
| H | 2.013797  | 3.522341  | -1.893946 | C  | 5.676872  | 0.072869  | 1.269347  |
| C | 1.536313  | 2.824706  | 0.730685  | H  | 5.516715  | -0.713625 | 2.014363  |
| H | 2.445064  | 3.388569  | 0.498381  | H  | 6.746089  | 0.107844  | 1.029811  |
| H | 0.942306  | 3.401357  | 1.452837  | H  | 5.391742  | 1.033016  | 1.712434  |
| H | 1.822876  | 1.892851  | 1.230592  | H  | 1.987005  | -4.646915 | -0.397329 |

|     |           |           |           |       |           |           |           |
|-----|-----------|-----------|-----------|-------|-----------|-----------|-----------|
| H   | 2.170197  | -3.012468 | -1.229068 | H     | -0.380663 | 2.514474  | 1.484149  |
| H   | 0.974449  | -3.669580 | 1.530208  | H     | -3.655241 | 1.147500  | 2.521459  |
| H   | 1.569836  | -1.263444 | 1.887662  | H     | -3.816847 | 0.973460  | 0.771727  |
| H   | -0.070722 | -1.487811 | 1.359269  | H     | -3.559544 | -0.451819 | 1.790616  |
|     |           |           |           | H     | 1.263811  | -1.132458 | 1.198795  |
|     |           |           |           | O     | 3.341570  | 0.342214  | 0.206019  |
| PdH |           |           |           | C     | 4.377720  | -0.591171 | 0.062530  |
| Pd  | 1.393367  | 0.020874  | 0.200100  | H     | 4.198799  | -1.281141 | -0.783247 |
| P   | -0.911695 | -0.018775 | -0.001274 | H     | 4.465685  | -1.216613 | 0.969460  |
| C   | -1.304993 | 1.053900  | -1.578304 | C     | 5.704211  | 0.140465  | -0.164068 |
| C   | -0.340566 | 2.267644  | -1.570733 | H     | 5.919306  | 0.808327  | 0.678487  |
| C   | -0.956783 | 0.255503  | -2.855720 | H     | 6.532716  | -0.574656 | -0.265498 |
| C   | -2.757220 | 1.558756  | -1.700231 | H     | 5.655974  | 0.748581  | -1.075613 |
| H   | -0.487204 | 2.941495  | -0.727017 |       |           |           |           |
| H   | 0.710796  | 1.951310  | -1.573924 |       |           |           |           |
| H   | -0.501870 | 2.849600  | -2.488385 | Int 1 |           |           |           |
| H   | -1.657148 | -0.557978 | -3.057219 | Pd    | 1.333067  | 0.150701  | -0.064167 |
| H   | -1.004969 | 0.940653  | -3.712584 | P     | 3.067437  | -1.427064 | -0.250280 |
| H   | 0.058124  | -0.153640 | -2.820556 | C     | 2.204091  | -3.167942 | -0.366889 |
| H   | -2.864828 | 2.102024  | -2.649455 | C     | 1.013209  | -3.174643 | 0.622574  |
| H   | -3.486260 | 0.743892  | -1.707233 | C     | 1.592961  | -3.369756 | -1.771680 |
| H   | -3.030782 | 2.253461  | -0.902198 | C     | 3.118438  | -4.374287 | -0.061572 |
| C   | -1.615404 | -1.811015 | -0.252920 | H     | 1.311214  | -3.055344 | 1.664107  |
| C   | -3.039452 | -1.873188 | -0.846148 | H     | 0.302577  | -2.375834 | 0.384735  |
| C   | -0.646089 | -2.591023 | -1.175431 | H     | 0.490067  | -4.136917 | 0.532294  |
| C   | -1.617788 | -2.567748 | 1.094898  | H     | 2.346207  | -3.524551 | -2.547602 |
| H   | -3.777071 | -1.344894 | -0.236334 | H     | 0.968693  | -4.273095 | -1.745944 |
| H   | -3.089863 | -1.474994 | -1.862645 | H     | 0.952682  | -2.532174 | -2.063096 |
| H   | -3.352379 | -2.924980 | -0.899070 | H     | 2.537046  | -5.296089 | -0.201535 |
| H   | 0.374023  | -2.581095 | -0.780115 | H     | 3.982153  | -4.431515 | -0.728902 |
| H   | -0.983350 | -3.635216 | -1.228055 | H     | 3.480982  | -4.378202 | 0.968736  |
| H   | -0.616692 | -2.208605 | -2.195939 | C     | 4.165575  | -1.154982 | -1.843771 |
| H   | -1.857976 | -3.620436 | 0.895684  | C     | 5.025217  | -2.382895 | -2.223569 |
| H   | -0.637936 | -2.542146 | 1.581741  | C     | 3.294828  | -0.782506 | -3.067367 |
| H   | -2.369865 | -2.194960 | 1.793976  | C     | 5.102619  | 0.054766  | -1.623216 |
| C   | -1.755212 | 0.794425  | 1.550847  | H     | 5.663860  | -2.732167 | -1.410150 |
| C   | -1.087850 | 0.226647  | 2.828304  | H     | 4.418856  | -3.224590 | -2.568302 |
| C   | -1.453511 | 2.310883  | 1.565973  | H     | 5.683230  | -2.101477 | -3.056959 |
| C   | -3.282455 | 0.595747  | 1.647478  | H     | 2.787111  | 0.173261  | -2.920826 |
| H   | -1.256414 | -0.840844 | 2.971654  | H     | 3.960981  | -0.684436 | -3.935590 |
| H   | -0.007997 | 0.400576  | 2.822687  | H     | 2.539968  | -1.528005 | -3.316684 |
| H   | -1.513752 | 0.744706  | 3.698406  | H     | 5.578085  | 0.298055  | -2.582703 |
| H   | -1.980485 | 2.863557  | 0.784929  | H     | 4.552297  | 0.942699  | -1.295738 |
| H   | -1.789784 | 2.717624  | 2.528827  | H     | 5.903834  | -0.146377 | -0.909596 |

|   |           |           |           |     |           |           |           |
|---|-----------|-----------|-----------|-----|-----------|-----------|-----------|
| C | 4.232159  | -1.384150 | 1.311595  | H   | 1.851356  | 2.871126  | 1.591651  |
| C | 4.555760  | 0.094357  | 1.644533  | C   | 1.318176  | 5.543442  | -1.191333 |
| C | 3.459026  | -1.928660 | 2.534450  | H   | -0.079701 | 4.131241  | -2.039020 |
| C | 5.551158  | -2.172983 | 1.168651  | C   | 2.214067  | 5.800797  | -0.147503 |
| H | 5.125128  | 0.603315  | 0.866546  | H   | 3.106607  | 5.044953  | 1.667636  |
| H | 3.637746  | 0.648738  | 1.856160  | H   | 1.165524  | 6.281243  | -1.974845 |
| H | 5.173470  | 0.103042  | 2.554085  | H   | 2.759724  | 6.740772  | -0.119759 |
| H | 3.277837  | -3.005347 | 2.486165  | O   | 1.510611  | 0.640023  | 1.999381  |
| H | 4.074012  | -1.748083 | 3.426602  | C   | 0.404645  | 0.421527  | 2.813191  |
| H | 2.519084  | -1.388186 | 2.668781  | H   | 0.188987  | -0.663780 | 2.942331  |
| H | 6.071058  | -2.142513 | 2.136035  | H   | -0.525980 | 0.858676  | 2.388451  |
| H | 5.400581  | -3.225683 | 0.915013  | C   | 0.614488  | 1.031145  | 4.207098  |
| H | 6.229014  | -1.734435 | 0.431745  | H   | 0.770357  | 2.114629  | 4.132295  |
| H | 1.168484  | -0.166067 | -1.581995 | H   | -0.255544 | 0.849611  | 4.854866  |
| S | -4.348397 | 0.416092  | -1.525176 | H   | 1.500384  | 0.596399  | 4.686245  |
| O | -3.683169 | -0.198082 | -2.680099 | H   | -4.537891 | 1.548066  | 0.941026  |
| O | -5.348157 | 1.478831  | -1.675967 | H   | -2.848988 | 1.652147  | 1.427260  |
| C | -5.123641 | -0.908035 | -0.582987 | H   | -4.168313 | 3.656389  | -0.527996 |
| C | -4.552670 | -2.186595 | -0.589226 | H   | -2.294548 | 3.980280  | 1.908836  |
| C | -5.138786 | -3.198668 | 0.168265  | H   | -2.976429 | 5.325065  | 0.835736  |
| C | -6.293877 | -2.961220 | 0.933593  |     |           |           |           |
| C | -6.852240 | -1.675791 | 0.911592  |     |           |           |           |
| C | -6.278295 | -0.647856 | 0.158471  | TS1 |           |           |           |
| H | -3.679019 | -2.390064 | -1.200398 | Pd  | 1.166015  | -0.089802 | -0.499330 |
| H | -4.699125 | -4.193785 | 0.156373  | P   | 3.376723  | -0.902125 | 0.140254  |
| H | -7.755172 | -1.473541 | 1.482857  | C   | -0.681904 | 0.930155  | -0.642438 |
| H | -6.733569 | 0.336551  | 0.123657  | C   | -2.040979 | 0.334630  | -0.613575 |
| C | -6.917790 | -4.072909 | 1.744680  | C   | 0.100147  | 1.920192  | -0.653123 |
| H | -7.213307 | -4.913179 | 1.103913  | N   | -2.570074 | 0.300444  | 0.766032  |
| H | -6.212331 | -4.465415 | 2.487827  | H   | -2.701581 | 0.953041  | -1.227352 |
| H | -7.809373 | -3.728139 | 2.277856  | H   | -2.005808 | -0.677854 | -1.020013 |
| N | -3.126642 | 1.070047  | -0.565383 | C   | 0.322932  | 3.352456  | -0.696168 |
| C | -3.543532 | 1.875797  | 0.610490  | S   | -4.098988 | 0.953071  | 1.017561  |
| C | -3.561639 | 3.355744  | 0.324259  | C   | -2.125063 | -0.828175 | 1.609553  |
| C | -2.914773 | 4.263233  | 1.059990  | C   | 1.563075  | 3.939386  | -0.993664 |
| C | -1.873089 | 0.303725  | -0.449503 | C   | -0.791672 | 4.185907  | -0.457295 |
| H | -1.771434 | -0.308578 | -1.348856 | O   | -4.152458 | 2.182502  | 0.211514  |
| H | -1.901709 | -0.370516 | 0.420485  | O   | -4.312177 | 0.970667  | 2.466675  |
| C | -0.703160 | 1.193362  | -0.338255 | C   | -5.302211 | -0.191764 | 0.320864  |
| C | 0.054978  | 2.159240  | -0.252906 | C   | -1.312915 | -0.445608 | 2.822396  |
| C | 0.807914  | 3.379326  | -0.216903 | C   | 1.692169  | 5.327626  | -1.054026 |
| C | 1.711309  | 3.639061  | 0.833374  | H   | 2.422026  | 3.302887  | -1.183060 |
| C | 0.617451  | 4.338353  | -1.232404 | C   | -0.653359 | 5.571647  | -0.516392 |
| C | 2.408283  | 4.846925  | 0.858280  | H   | -1.754523 | 3.740811  | -0.221308 |

|   |           |           |           |       |           |           |           |
|---|-----------|-----------|-----------|-------|-----------|-----------|-----------|
| C | -5.650274 | -0.101927 | -1.031970 | H     | 3.551228  | -1.336362 | 3.295106  |
| C | -5.869356 | -1.173369 | 1.137157  | H     | 4.689113  | -2.795281 | 2.432940  |
| C | -0.995964 | 0.785618  | 3.225234  | C     | 4.625382  | -3.254423 | 1.444004  |
| C | 0.586403  | 6.148720  | -0.814977 | C     | 3.391696  | -2.789428 | 0.640206  |
| H | 2.658239  | 5.767347  | -1.288384 | H     | 4.538794  | -4.338284 | 1.602828  |
| H | -1.518024 | 6.201801  | -0.325373 | H     | 5.569663  | -3.078701 | 0.920812  |
| C | -6.558267 | -1.015026 | -1.565157 | C     | 2.105832  | -3.076603 | 1.455428  |
| H | -5.237095 | 0.689410  | -1.649069 | C     | 3.297928  | -3.674245 | -0.623162 |
| C | -6.777566 | -2.080272 | 0.584973  | H     | 2.069129  | -2.544151 | 2.406704  |
| H | -5.623999 | -1.206688 | 2.193678  | H     | 1.215387  | -2.828696 | 0.867519  |
| H | 0.689061  | 7.229776  | -0.859518 | H     | 2.083736  | -4.151657 | 1.685706  |
| C | -7.132572 | -2.021406 | -0.769889 | H     | 4.207911  | -3.660386 | -1.228033 |
| H | -6.833958 | -0.938395 | -2.614846 | H     | 3.147453  | -4.711921 | -0.296299 |
| H | -7.223552 | -2.839187 | 1.223618  | H     | 2.445892  | -3.405882 | -1.247117 |
| C | -8.113518 | -3.003936 | -1.366317 | O     | 0.138253  | -1.923098 | -0.762696 |
| H | -7.637109 | -3.616829 | -2.142188 | C     | 0.167091  | -2.518042 | -2.028199 |
| H | -8.515444 | -3.680723 | -0.605581 | H     | 0.009294  | -3.608500 | -1.906564 |
| H | -8.958412 | -2.486097 | -1.836971 | H     | 1.152515  | -2.410328 | -2.521380 |
| H | 1.759806  | 1.384246  | -0.396823 | C     | -0.887288 | -2.006490 | -3.024861 |
| C | 4.612924  | -0.628164 | -1.338598 | H     | -0.771021 | -0.929967 | -3.206694 |
| C | 3.890017  | -1.062605 | -2.636457 | H     | -0.784738 | -2.524518 | -3.989494 |
| C | 4.914258  | 0.877845  | -1.504081 | H     | -1.904471 | -2.188433 | -2.655038 |
| C | 5.960090  | -1.375474 | -1.236268 | H     | -2.991614 | -1.424731 | 1.930098  |
| H | 3.664378  | -2.128820 | -2.669151 | H     | -1.522361 | -1.482890 | 0.964683  |
| H | 2.950824  | -0.515006 | -2.768858 | H     | -0.967886 | -1.307695 | 3.396299  |
| H | 4.539387  | -0.836549 | -3.493567 | H     | -0.400151 | 0.947204  | 4.119965  |
| H | 5.543373  | 1.279039  | -0.706135 | H     | -1.333047 | 1.666240  | 2.687061  |
| H | 5.459497  | 1.019172  | -2.446871 |       |           |           |           |
| H | 3.997362  | 1.471741  | -1.564598 |       |           |           |           |
| H | 6.574730  | -1.112057 | -2.108428 | Int 2 |           |           |           |
| H | 6.528547  | -1.102055 | -0.343935 | Pd    | 1.154103  | 0.086361  | -0.389727 |
| H | 5.842563  | -2.461208 | -1.245735 | P     | 3.546999  | -0.626227 | 0.089621  |
| H | 6.129458  | 0.487439  | 1.161110  | C     | -0.552480 | 1.113179  | -0.507525 |
| C | 5.538813  | 0.000478  | 1.941820  | C     | -1.937183 | 0.535793  | -0.398990 |
| C | 4.018950  | 0.115629  | 1.684972  | C     | -0.179369 | 2.387349  | -0.732693 |
| H | 5.885765  | -1.029581 | 2.038478  | N     | -2.369471 | 0.272687  | 1.003513  |
| H | 5.772810  | 0.513474  | 2.884874  | H     | -2.660296 | 1.228842  | -0.836770 |
| C | 3.678459  | 1.617379  | 1.531484  | H     | -1.953851 | -0.403019 | -0.965955 |
| C | 3.262172  | -0.340641 | 2.954272  | C     | -0.926464 | 3.662278  | -0.733558 |
| H | 2.599312  | 1.785798  | 1.533821  | S     | -4.037264 | 0.305420  | 1.276533  |
| H | 4.099006  | 2.150650  | 2.395025  | C     | -1.619244 | -0.775107 | 1.730367  |
| H | 4.094290  | 2.075589  | 0.634037  | C     | -0.348339 | 4.769901  | -1.387978 |
| H | 3.502477  | 0.359637  | 3.765681  | C     | -2.172900 | 3.841293  | -0.102245 |
| H | 2.177032  | -0.316342 | 2.812133  | O     | -4.538747 | 1.527761  | 0.632081  |



|   |           |           |           |     |           |           |           |
|---|-----------|-----------|-----------|-----|-----------|-----------|-----------|
| O | -4.228353 | 0.066934  | 2.710837  | C   | 3.443848  | 1.881179  | 1.393940  |
| C | -4.769300 | -1.090257 | 0.402924  | C   | 3.387278  | -0.063807 | 2.900162  |
| C | -0.791041 | -0.260368 | 2.881437  | H   | 2.350671  | 1.830931  | 1.300311  |
| C | -0.999596 | 6.002056  | -1.437310 | H   | 3.656455  | 2.503321  | 2.274043  |
| H | 0.620335  | 4.654415  | -1.870799 | H   | 3.841323  | 2.404050  | 0.523697  |
| C | -2.823850 | 5.075396  | -0.154261 | H   | 3.546965  | 0.669594  | 3.702102  |
| H | -2.638419 | 3.029927  | 0.443511  | H   | 2.306282  | -0.183221 | 2.780780  |
| C | -5.102351 | -0.966183 | -0.950998 | H   | 3.812757  | -1.009319 | 3.242242  |
| C | -4.987695 | -2.291683 | 1.081080  | H   | 5.054103  | -2.355378 | 2.355812  |
| C | -0.743772 | 0.992929  | 3.337088  | C   | 5.024869  | -2.839920 | 1.377179  |
| C | -2.245941 | 6.159698  | -0.821789 | C   | 3.751048  | -2.497537 | 0.576333  |
| H | -0.534612 | 6.838294  | -1.954021 | H   | 5.046108  | -3.923978 | 1.556833  |
| H | -3.786355 | 5.185381  | 0.338699  | H   | 5.942565  | -2.580746 | 0.841569  |
| C | -5.641992 | -2.060792 | -1.624310 | C   | 2.495686  | -2.901749 | 1.389169  |
| H | -4.965341 | -0.017604 | -1.460007 | C   | 3.731104  | -3.383368 | -0.689900 |
| C | -5.530453 | -3.378089 | 0.390144  | H   | 2.417116  | -2.385628 | 2.346867  |
| H | -4.763362 | -2.363412 | 2.140356  | H   | 1.581154  | -2.716588 | 0.816718  |
| H | -2.756476 | 7.118853  | -0.855241 | H   | 2.554033  | -3.977997 | 1.604526  |
| C | -5.860600 | -3.284539 | -0.968977 | H   | 4.629358  | -3.279223 | -1.303180 |
| H | -5.907714 | -1.960129 | -2.674612 | H   | 3.681834  | -4.432716 | -0.369700 |
| H | -5.707921 | -4.309967 | 0.922111  | H   | 2.851287  | -3.192788 | -1.309453 |
| C | -6.446122 | -4.460671 | -1.715719 | O   | 0.168206  | -1.617058 | -0.938637 |
| H | -6.604460 | -5.317437 | -1.052897 | C   | 0.331729  | -2.057398 | -2.259352 |
| H | -7.411203 | -4.203119 | -2.169536 | H   | -0.124285 | -3.063990 | -2.299466 |
| H | -5.782728 | -4.783599 | -2.528297 | H   | 1.397595  | -2.193525 | -2.518773 |
| H | 0.885840  | 2.537793  | -0.972404 | C   | -0.322777 | -1.179709 | -3.331306 |
| C | 4.738154  | -0.219061 | -1.394036 | H   | 0.100113  | -0.167008 | -3.314324 |
| C | 4.068647  | -0.739286 | -2.689762 | H   | -0.157286 | -1.606218 | -4.330535 |
| C | 4.848342  | 1.312294  | -1.572801 | H   | -1.404015 | -1.097585 | -3.170695 |
| C | 6.163752  | -0.799972 | -1.290986 | H   | -2.313768 | -1.530756 | 2.119921  |
| H | 3.975199  | -1.824792 | -2.725115 | H   | -0.983409 | -1.296577 | 1.004805  |
| H | 3.070321  | -0.308840 | -2.820822 | H   | -0.200376 | -1.036690 | 3.372061  |
| H | 4.682038  | -0.435464 | -3.549226 | H   | -0.123303 | 1.258582  | 4.189325  |
| H | 5.415085  | 1.800405  | -0.777035 | H   | -1.331539 | 1.783926  | 2.881233  |
| H | 5.377120  | 1.513335  | -2.514065 |     |           |           |           |
| H | 3.864274  | 1.788164  | -1.647061 |     |           |           |           |
| H | 6.746350  | -0.472529 | -2.163654 | Ts4 |           |           |           |
| H | 6.694399  | -0.459250 | -0.398131 | Pd  | 0.996312  | -0.255520 | 1.241388  |
| H | 6.171561  | -1.892591 | -1.293771 | C   | -0.278999 | 1.455904  | 0.955028  |
| H | 6.092294  | 1.127680  | 1.063135  | C   | -1.660102 | 1.025675  | 0.466530  |
| C | 5.569433  | 0.615289  | 1.874652  | C   | 0.245055  | 2.703299  | 0.799490  |
| C | 4.055569  | 0.474978  | 1.614040  | N   | -2.417361 | 0.254142  | 1.486903  |
| H | 6.058340  | -0.348832 | 2.038255  | H   | -2.284036 | 1.890726  | 0.235467  |
| H | 5.719841  | 1.216525  | 2.782311  | H   | -1.543049 | 0.427483  | -0.453427 |

|   |           |           |           |   |           |           |           |
|---|-----------|-----------|-----------|---|-----------|-----------|-----------|
| S | -4.077985 | 0.102796  | 1.209540  | P | 2.448800  | -0.485107 | -0.906054 |
| C | -1.759256 | -0.886430 | 2.151601  | C | 2.002511  | -2.167872 | -1.793207 |
| O | -4.536174 | 1.408486  | 0.721948  | C | 1.733266  | -3.252134 | -0.724475 |
| O | -4.639957 | -0.508068 | 2.419110  | C | 0.679214  | -2.008121 | -2.575891 |
| C | -0.454269 | -0.434908 | 2.776196  | C | 3.073492  | -2.699092 | -2.771431 |
| C | -0.258864 | 0.964090  | 2.905946  | H | 2.607802  | -3.500138 | -0.126828 |
| H | 0.613723  | 1.323689  | 3.447750  | H | 0.952416  | -2.953217 | -0.021343 |
| H | -1.124248 | 1.615375  | 2.983665  | H | 1.406173  | -4.164506 | -1.243696 |
| O | 1.932608  | -1.983035 | 2.013804  | H | 0.790357  | -1.415866 | -3.487123 |
| C | 2.514082  | -1.911385 | 3.278588  | H | 0.339329  | -3.006418 | -2.882236 |
| H | 1.892134  | -1.360251 | 4.018646  | H | -0.114679 | -1.568706 | -1.962444 |
| H | 3.483592  | -1.367439 | 3.260844  | H | 2.688298  | -3.613301 | -3.245244 |
| C | 2.760987  | -3.319371 | 3.838083  | H | 3.313681  | -1.995231 | -3.571173 |
| H | 3.421075  | -3.887275 | 3.171176  | H | 4.002480  | -2.971030 | -2.266019 |
| H | 3.228366  | -3.273138 | 4.832149  | H | 2.418618  | -0.144621 | -4.166826 |
| H | 1.814863  | -3.868471 | 3.920183  | C | 2.940837  | 0.648179  | -3.624673 |
| H | -2.444029 | -1.250664 | 2.925491  | C | 2.305865  | 0.931654  | -2.246259 |
| H | -1.571992 | -1.717600 | 1.451728  | H | 3.998488  | 0.384423  | -3.568356 |
| H | 1.193317  | 2.872368  | 1.311941  | H | 2.861702  | 1.557915  | -4.237204 |
| C | -0.260774 | 3.914011  | 0.136830  | C | 0.811352  | 1.257197  | -2.476495 |
| C | -1.206571 | 3.941802  | -0.911161 | C | 2.938194  | 2.222482  | -1.674528 |
| C | 0.262929  | 5.153465  | 0.571427  | H | 0.304475  | 1.464917  | -1.535510 |
| C | -1.632596 | 5.150435  | -1.463878 | H | 0.741823  | 2.159644  | -3.098735 |
| H | -1.591191 | 3.018343  | -1.327606 | H | 0.272183  | 0.465137  | -2.995343 |
| C | -0.164422 | 6.360100  | 0.021736  | H | 2.691081  | 3.058348  | -2.342502 |
| H | 1.008837  | 5.159793  | 1.363499  | H | 2.541333  | 2.468113  | -0.686080 |
| C | -1.122073 | 6.365529  | -0.998206 | H | 4.026874  | 2.173150  | -1.611469 |
| H | -2.363251 | 5.140241  | -2.268761 | H | 5.353320  | 0.671809  | -1.856925 |
| H | 0.250332  | 7.296199  | 0.387155  | C | 5.375872  | -0.333993 | -1.430892 |
| H | -1.458036 | 7.303841  | -1.431477 | C | 4.314603  | -0.559815 | -0.333148 |
| C | -4.282641 | -1.075722 | -0.135229 | H | 6.369240  | -0.467871 | -0.979847 |
| C | -4.354822 | -2.444216 | 0.148835  | H | 5.293359  | -1.055695 | -2.248381 |
| C | -4.348570 | -0.616772 | -1.453089 | C | 4.491289  | 0.511558  | 0.770957  |
| C | -4.482254 | -3.352228 | -0.901431 | C | 4.608102  | -1.922948 | 0.333530  |
| H | -4.335356 | -2.787312 | 1.178245  | H | 4.330021  | 1.531491  | 0.416751  |
| C | -4.477614 | -1.541468 | -2.492182 | H | 3.811186  | 0.326948  | 1.608304  |
| H | -4.325366 | 0.448804  | -1.657570 | H | 5.519561  | 0.455751  | 1.154379  |
| C | -4.545256 | -2.918742 | -2.236498 | H | 4.707865  | -2.731530 | -0.395445 |
| H | -4.543474 | -4.415450 | -0.679461 | H | 5.571261  | -1.846010 | 0.857117  |
| H | -4.536968 | -1.183214 | -3.517382 | H | 3.831881  | -2.185395 | 1.056514  |
| C | -4.709315 | -3.915257 | -3.360400 | H | 0.054726  | -1.143753 | 3.419011  |
| H | -4.558101 | -3.446066 | -4.337863 |   |           |           |           |
| H | -3.996273 | -4.742954 | -3.267207 |   |           |           |           |
| H | -5.716131 | -4.353090 | -3.353684 |   |           |           |           |

|    |           |           |           |   |           |           |           |
|----|-----------|-----------|-----------|---|-----------|-----------|-----------|
| C  | 2.373717  | -1.864538 | -0.405029 | O | -1.869765 | 0.447728  | 2.132072  |
| C  | 3.147675  | -0.571634 | -0.251777 | C | -1.305208 | 0.011049  | 3.342559  |
| C  | 2.931969  | -3.084701 | -0.523268 | H | -0.203467 | 0.044147  | 3.328262  |
| N  | 2.622659  | 0.189904  | 0.901760  | H | -1.593656 | -1.030543 | 3.576755  |
| H  | 4.203183  | -0.766047 | -0.068927 | C | -1.798196 | 0.933289  | 4.464149  |
| H  | 3.055329  | 0.030079  | -1.177058 | H | -2.890554 | 0.897156  | 4.548814  |
| S  | 3.622018  | 1.413222  | 1.504317  | H | -1.363531 | 0.625758  | 5.424631  |
| C  | 1.170422  | 0.486461  | 0.821549  | H | -1.501689 | 1.969376  | 4.265113  |
| O  | 4.981611  | 0.860671  | 1.537122  | P | -3.928136 | -0.286677 | -0.510548 |
| O  | 2.965515  | 1.920178  | 2.713991  | C | -4.146447 | 1.479140  | -1.293430 |
| C  | 0.402953  | -0.825439 | 0.782817  | C | -3.518585 | 2.506653  | -0.317572 |
| C  | 0.859713  | -1.695993 | -0.388700 | C | -3.312994 | 1.573817  | -2.591953 |
| H  | 0.564636  | -1.208071 | -1.338444 | C | -5.595274 | 1.901113  | -1.613787 |
| H  | 0.381995  | -2.682683 | -0.367084 | H | -4.076159 | 2.617909  | 0.611609  |
| H  | 0.890388  | 1.074430  | 1.695248  | H | -2.491495 | 2.237092  | -0.052300 |
| H  | 0.962991  | 1.082829  | -0.084324 | H | -3.501444 | 3.488355  | -0.811198 |
| H  | 2.246474  | -3.933879 | -0.548637 | H | -3.723622 | 0.981996  | -3.413529 |
| C  | 4.360224  | -3.457010 | -0.602203 | H | -3.307471 | 2.620845  | -2.923019 |
| C  | 4.801022  | -4.612240 | 0.072390  | H | -2.269876 | 1.279698  | -2.430700 |
| C  | 5.299846  | -2.740855 | -1.366619 | H | -5.581122 | 2.894886  | -2.083514 |
| C  | 6.136076  | -5.013217 | 0.020216  | H | -6.091266 | 1.218388  | -2.309505 |
| H  | 4.086976  | -5.189384 | 0.656012  | H | -6.214016 | 1.981469  | -0.716621 |
| C  | 6.636536  | -3.142746 | -1.422909 | H | -5.207441 | -0.488746 | -3.476594 |
| H  | 4.977126  | -1.880221 | -1.945741 | C | -5.338657 | -1.392978 | -2.876934 |
| C  | 7.062391  | -4.276139 | -0.725216 | C | -4.172372 | -1.629154 | -1.895618 |
| H  | 6.454074  | -5.901057 | 0.561148  | H | -6.303560 | -1.324496 | -2.367191 |
| H  | 7.344031  | -2.573076 | -2.020421 | H | -5.396670 | -2.238090 | -3.577585 |
| H  | 8.102836  | -4.587480 | -0.768676 | C | -2.845862 | -1.717391 | -2.691017 |
| C  | 3.618717  | 2.750484  | 0.295648  | C | -4.356676 | -3.021560 | -1.249222 |
| C  | 2.629646  | 3.737739  | 0.358288  | H | -2.001474 | -1.954188 | -2.029177 |
| C  | 4.590444  | 2.778916  | -0.708437 | H | -2.919234 | -2.533846 | -3.422602 |
| C  | 2.616799  | 4.752435  | -0.599044 | H | -2.600513 | -0.808337 | -3.240445 |
| H  | 1.896275  | 3.720175  | 1.158121  | H | -4.307138 | -3.780958 | -2.041377 |
| C  | 4.562245  | 3.802580  | -1.658073 | H | -3.564107 | -3.248034 | -0.528075 |
| H  | 5.370030  | 2.023970  | -0.727716 | H | -5.322136 | -3.138430 | -0.752838 |
| C  | 3.579833  | 4.803439  | -1.620017 | H | -6.772713 | -1.778568 | -0.177967 |
| H  | 1.850645  | 5.523040  | -0.545712 | C | -6.697007 | -0.833222 | 0.366190  |
| H  | 5.323499  | 3.827993  | -2.434738 | C | -5.267818 | -0.544384 | 0.869484  |
| C  | 3.576707  | 5.929422  | -2.628043 | H | -7.367577 | -0.908662 | 1.233770  |
| H  | 4.120259  | 5.654903  | -3.538289 | H | -7.085829 | -0.038858 | -0.277136 |
| H  | 2.556285  | 6.210502  | -2.912235 | C | -4.791521 | -1.708176 | 1.774156  |
| H  | 4.057929  | 6.826381  | -2.215271 | C | -5.305487 | 0.702921  | 1.782567  |
| H  | 0.500869  | -1.357819 | 1.734318  | H | -4.766224 | -2.673822 | 1.267658  |
| Pd | -1.579933 | -0.523490 | 0.379395  | H | -3.797552 | -1.502009 | 2.181731  |

|     |           |           |           |   |           |           |           |
|-----|-----------|-----------|-----------|---|-----------|-----------|-----------|
| H   | -5.491041 | -1.801753 | 2.616335  | H | 8.286128  | -0.180483 | -2.815311 |
| H   | -5.767354 | 1.568144  | 1.300497  | H | 7.234859  | 1.221355  | -3.085831 |
| H   | -5.920494 | 0.462444  | 2.660691  | H | 0.583826  | 0.318555  | -1.594225 |
| H   | -4.305232 | 0.969810  | 2.136218  | C | -4.234591 | 0.696634  | -1.784764 |
|     |           |           |           | C | -4.174004 | 2.135001  | -1.215190 |
| TS3 |           |           |           | C | -3.337887 | 0.703447  | -3.043375 |
| Pd  | -1.409638 | 0.519980  | 0.536713  | C | -5.681211 | 0.385003  | -2.224129 |
| P   | -3.492785 | -0.512478 | -0.452150 | H | -4.778267 | 2.274958  | -0.320241 |
| C   | 0.404110  | 0.074569  | 0.515497  | H | -3.149430 | 2.422675  | -0.962970 |
| C   | 1.151864  | -0.733542 | 1.522190  | H | -4.545454 | 2.825206  | -1.985669 |
| C   | 0.627776  | 0.826627  | -0.627998 | H | -3.416455 | -0.214714 | -3.630751 |
| N   | 2.211622  | -1.597724 | 0.957347  | H | -3.663078 | 1.528127  | -3.691734 |
| H   | 1.636852  | -0.038880 | 2.217820  | H | -2.285928 | 0.877969  | -2.795406 |
| H   | 0.458002  | -1.333287 | 2.126289  | H | -5.972208 | 1.099810  | -3.006955 |
| C   | 1.166577  | 2.196738  | -0.692954 | H | -5.790484 | -0.618666 | -2.642964 |
| S   | 3.728131  | -1.583742 | 1.740664  | H | -6.399872 | 0.493816  | -1.408989 |
| C   | 1.783560  | -2.862241 | 0.335628  | H | -4.266357 | -2.120415 | -3.156320 |
| C   | 1.518419  | 2.735588  | -1.946567 | C | -4.123767 | -2.758043 | -2.279974 |
| C   | 1.391822  | 2.983528  | 0.455429  | C | -3.050092 | -2.201591 | -1.320064 |
| O   | 4.114569  | -2.974397 | 2.020191  | H | -5.094463 | -2.899663 | -1.799908 |
| O   | 3.632747  | -0.590465 | 2.820601  | H | -3.793481 | -3.739474 | -2.648911 |
| C   | 4.893815  | -0.943966 | 0.533751  | C | -1.729744 | -2.033802 | -2.108760 |
| C   | 1.971764  | -2.962602 | -1.159033 | C | -2.754169 | -3.266967 | -0.239612 |
| C   | 2.086383  | 4.006299  | -2.050294 | H | -0.918013 | -1.691603 | -1.461887 |
| H   | 1.347261  | 2.145364  | -2.844698 | H | -1.442613 | -3.011944 | -2.518690 |
| C   | 1.966792  | 4.248483  | 0.351743  | H | -1.808064 | -1.343083 | -2.948426 |
| H   | 1.094694  | 2.602710  | 1.428585  | H | -2.342049 | -4.157314 | -0.733671 |
| C   | 5.788850  | -1.814184 | -0.086591 | H | -2.009334 | -2.915963 | 0.482746  |
| C   | 4.902550  | 0.425162  | 0.246364  | H | -3.642923 | -3.586063 | 0.307948  |
| C   | 2.524820  | -2.053471 | -1.964453 | H | -5.559634 | -2.872945 | 0.368325  |
| C   | 2.316940  | 4.768970  | -0.901067 | C | -5.937308 | -1.860151 | 0.530696  |
| H   | 2.347004  | 4.401761  | -3.029158 | C | -4.833453 | -0.853695 | 0.919139  |
| H   | 2.132227  | 4.837174  | 1.250701  | H | -6.657493 | -1.917778 | 1.358782  |
| C   | 6.702789  | -1.301891 | -1.011782 | H | -6.493007 | -1.554477 | -0.360619 |
| H   | 5.774814  | -2.870768 | 0.158593  | C | -4.087196 | -1.360673 | 2.178637  |
| C   | 5.816447  | 0.916058  | -0.682976 | C | -5.512937 | 0.470589  | 1.341976  |
| H   | 4.212654  | 1.098529  | 0.745041  | H | -3.564012 | -2.306397 | 2.026507  |
| H   | 2.755297  | 5.760488  | -0.979142 | H | -3.373368 | -0.609400 | 2.528338  |
| C   | 6.731306  | 0.063398  | -1.326179 | H | -4.826013 | -1.523375 | 2.975921  |
| H   | 7.405029  | -1.978459 | -1.493202 | H | -6.183269 | 0.870209  | 0.576640  |
| H   | 5.822477  | 1.980157  | -0.908137 | H | -6.130583 | 0.260251  | 2.226388  |
| C   | 7.730114  | 0.618712  | -2.314738 | H | -4.766671 | 1.220381  | 1.618056  |
| H   | 8.458773  | 1.269947  | -1.814674 | O | -2.625859 | 1.640720  | 1.776072  |
|     |           |           |           | C | -2.109343 | 2.801530  | 2.365151  |

|       |           |           |           |   |           |           |           |
|-------|-----------|-----------|-----------|---|-----------|-----------|-----------|
| H     | -2.960390 | 3.445127  | 2.661433  | H | 6.413153  | 0.004013  | -1.270980 |
| H     | -1.512573 | 3.395111  | 1.646853  | H | -4.047191 | 5.634701  | 0.149144  |
| C     | -1.260472 | 2.521794  | 3.611166  | C | 5.746846  | -3.269310 | -0.516357 |
| H     | -0.389427 | 1.904125  | 3.354282  | H | 4.347131  | -3.895521 | 1.005331  |
| H     | -0.899695 | 3.455518  | 4.066086  | H | 7.063219  | -2.304331 | -1.926456 |
| H     | -1.847930 | 1.976301  | 4.359699  | C | 6.159142  | -4.675670 | -0.885297 |
| H     | 1.613516  | -3.904767 | -1.578325 | H | 6.727091  | -5.146215 | -0.072047 |
| H     | 2.622785  | -2.235714 | -3.031642 | H | 5.285470  | -5.310033 | -1.078146 |
| H     | 2.902114  | -1.109100 | -1.584257 | H | 6.789524  | -4.686986 | -1.780384 |
| H     | 2.304061  | -3.697928 | 0.819895  | H | 1.309088  | 3.176196  | -0.250973 |
| H     | 0.719041  | -2.995679 | 0.573078  | C | -4.724002 | -0.848706 | 0.602953  |
|       |           |           |           | C | -4.412862 | -0.749881 | 2.116980  |
|       |           |           |           | C | -5.185517 | 0.565166  | 0.182268  |
|       |           |           |           | C | -5.898327 | -1.825678 | 0.387344  |
| Int 6 |           |           |           | H | -4.114275 | -1.698275 | 2.564137  |
| Pd    | -1.059758 | 0.115147  | 0.319664  | H | -3.619842 | -0.020675 | 2.312230  |
| P     | -3.066230 | -1.304963 | -0.306108 | H | -5.317228 | -0.410863 | 2.640749  |
| C     | 0.565909  | 1.290656  | 0.264274  | H | -5.557754 | 0.610223  | -0.843586 |
| C     | 1.886340  | 0.562602  | 0.303820  | H | -6.015819 | 0.863670  | 0.836475  |
| C     | 0.420679  | 2.608920  | 0.031964  | H | -4.394517 | 1.311792  | 0.301398  |
| N     | 3.056369  | 1.350350  | -0.166470 | H | -6.785034 | -1.436146 | 0.907150  |
| H     | 2.068140  | 0.274333  | 1.339324  | H | -6.162584 | -1.938929 | -0.667750 |
| H     | 1.814814  | -0.374563 | -0.267581 | H | -5.699277 | -2.819016 | 0.796913  |
| C     | -0.823240 | 3.405567  | 0.076302  | H | -5.431140 | -0.672450 | -2.424174 |
| S     | 4.506646  | 1.015926  | 0.654025  | C | -4.585947 | -1.211389 | -2.858776 |
| C     | 3.163973  | 1.492118  | -1.634207 | C | -3.242021 | -0.856994 | -2.190715 |
| C     | -0.946115 | 4.538331  | -0.752901 | H | -4.804568 | -2.281828 | -2.809057 |
| C     | -1.889376 | 3.115839  | 0.951457  | H | -4.541232 | -0.935160 | -3.921811 |
| O     | 4.183398  | 1.015468  | 2.085309  | C | -2.989531 | 0.666912  | -2.310146 |
| O     | 5.520537  | 1.917454  | 0.097562  | C | -2.110547 | -1.530034 | -3.001518 |
| C     | 4.997002  | -0.661424 | 0.207514  | H | -2.002684 | 0.945349  | -1.907145 |
| C     | 3.409044  | 2.884075  | -2.165335 | H | -2.981928 | 0.949154  | -3.371966 |
| C     | -2.096843 | 5.328327  | -0.734577 | H | -3.739165 | 1.281673  | -1.813423 |
| H     | -0.125904 | 4.793694  | -1.420205 | H | -2.117908 | -1.110659 | -4.016708 |
| C     | -3.041389 | 3.906276  | 0.971271  | H | -1.123232 | -1.332307 | -2.571517 |
| H     | -1.790320 | 2.286503  | 1.648655  | H | -2.238865 | -2.610071 | -3.099280 |
| C     | 4.418710  | -1.755889 | 0.861510  | H | -3.456260 | -3.961090 | -2.082777 |
| C     | 5.949307  | -0.854614 | -0.796209 | C | -3.632611 | -4.114125 | -1.014814 |
| C     | 3.653443  | 3.992796  | -1.465278 | C | -2.745241 | -3.211970 | -0.131986 |
| C     | -3.154848 | 5.014326  | 0.125598  | H | -3.391681 | -5.164481 | -0.798614 |
| H     | -2.165111 | 6.195173  | -1.387739 | H | -4.700605 | -3.978698 | -0.824139 |
| H     | -3.843077 | 3.670424  | 1.667637  | C | -1.253265 | -3.478056 | -0.456593 |
| C     | 4.794919  | -3.046459 | 0.493202  | C | -2.929995 | -3.633356 | 1.344074  |
| H     | 3.697966  | -1.600301 | 1.657363  | H | -0.996731 | -3.287018 | -1.499247 |
| C     | 6.315648  | -2.156023 | -1.150414 |   |           |           |           |

|     |           |           |           |   |           |           |           |
|-----|-----------|-----------|-----------|---|-----------|-----------|-----------|
| H   | -0.598136 | -2.880643 | 0.184833  | C | 0.067324  | 0.210918  | 2.784159  |
| H   | -1.046181 | -4.540361 | -0.264131 | C | -1.043171 | 5.797094  | 0.422778  |
| H   | -3.972474 | -3.613334 | 1.670629  | H | 0.398751  | 6.602843  | -0.969999 |
| H   | -2.581625 | -4.669541 | 1.449172  | H | -2.365258 | 4.690334  | 1.723566  |
| H   | -2.329163 | -3.018136 | 2.019737  | C | 6.229956  | -0.479615 | -1.908592 |
| O   | -0.091420 | -1.107957 | 1.617378  | H | 4.426149  | -1.673089 | -1.978447 |
| C   | -0.397964 | -0.949989 | 2.979899  | C | 6.963843  | 0.190708  | 0.287489  |
| H   | -0.002480 | -1.859077 | 3.470748  | H | 5.740886  | -0.476212 | 1.939328  |
| H   | -1.489222 | -0.957682 | 3.157681  | H | -1.484899 | 6.762442  | 0.655850  |
| C   | 0.217339  | 0.276612  | 3.658155  | C | 7.162415  | 0.190853  | -1.103649 |
| H   | -0.143921 | 1.204207  | 3.198547  | H | 6.370994  | -0.502281 | -2.986749 |
| H   | -0.049768 | 0.295396  | 4.723822  | H | 7.681856  | 0.694048  | 0.931462  |
| H   | 1.310340  | 0.268290  | 3.581575  | C | 8.367883  | 0.873327  | -1.707215 |
| H   | 3.933565  | 0.814274  | -2.038328 | H | 8.277787  | 0.959019  | -2.794860 |
| H   | 2.213210  | 1.130463  | -2.045414 | H | 8.503558  | 1.881106  | -1.297180 |
| H   | 3.373451  | 2.934840  | -3.255567 | H | 9.285990  | 0.310489  | -1.493209 |
| H   | 3.814813  | 4.943842  | -1.966494 | H | 1.506726  | 2.134024  | -1.317930 |
| H   | 3.725252  | 3.983111  | -0.382427 | C | -4.027061 | 0.629638  | -1.211160 |
|     |           |           |           | C | -4.465494 | 1.066539  | 0.206098  |
|     |           |           |           | C | -3.491953 | 1.899151  | -1.911075 |
|     |           |           |           | C | -5.277207 | 0.152107  | -1.983040 |
| TSS |           |           |           | H | -4.916663 | 0.263426  | 0.785871  |
| Pd  | -1.069984 | -0.019135 | 1.017706  | H | -3.627838 | 1.445788  | 0.795723  |
| P   | -2.590829 | -0.680471 | -1.034088 | H | -5.208202 | 1.870204  | 0.100889  |
| C   | 0.666571  | 0.789650  | 0.057288  | H | -3.312789 | 1.752826  | -2.979058 |
| C   | 1.666372  | -0.277024 | -0.367236 | H | -4.250937 | 2.687753  | -1.819236 |
| C   | 0.773475  | 2.024891  | -0.512030 | H | -2.576344 | 2.276829  | -1.446361 |
| N   | 2.297459  | -0.762360 | 0.876929  | H | -5.990706 | 0.986875  | -2.034801 |
| H   | 1.194785  | -1.126866 | -0.860496 | H | -5.059283 | -0.151217 | -3.009134 |
| H   | 2.420503  | 0.151872  | -1.051461 | H | -5.789121 | -0.673122 | -1.484358 |
| C   | 0.096158  | 3.279151  | -0.187095 | H | -3.256210 | -0.019217 | -4.174824 |
| S   | 3.515957  | -1.917691 | 0.763093  | C | -2.738952 | -0.965700 | -3.997866 |
| C   | 2.435787  | 0.330373  | 1.840934  | C | -1.760690 | -0.881019 | -2.804457 |
| C   | 0.572739  | 4.465677  | -0.789243 | H | -3.488402 | -1.751196 | -3.894064 |
| C   | -0.982135 | 3.390189  | 0.718060  | H | -2.158336 | -1.185239 | -4.905442 |
| O   | 3.030307  | -2.908812 | -0.202464 | C | -0.809828 | 0.306880  | -3.076603 |
| O   | 3.865421  | -2.274455 | 2.142445  | C | -0.865688 | -2.142973 | -2.822403 |
| C   | 4.951275  | -1.111881 | 0.034588  | H | -0.000213 | 0.345528  | -2.351248 |
| C   | 1.045675  | 0.923180  | 2.049005  | H | -0.363528 | 0.170880  | -4.072007 |
| C   | 0.012462  | 5.706599  | -0.491170 | H | -1.305610 | 1.277351  | -3.071748 |
| H   | 1.399816  | 4.404616  | -1.493739 | H | -0.254916 | -2.121549 | -3.735366 |
| C   | -1.534931 | 4.633186  | 1.024183  | H | -0.178490 | -2.181719 | -1.972968 |
| H   | -1.400145 | 2.490298  | 1.162700  | H | -1.431965 | -3.075071 | -2.839485 |
| C   | 5.127648  | -1.132328 | -1.351304 | H | -3.320764 | -3.486235 | -2.559239 |
| C   | 5.870050  | -0.455694 | 0.861807  |   |           |           |           |

|       |           |           |           |   |           |           |           |
|-------|-----------|-----------|-----------|---|-----------|-----------|-----------|
| C     | -4.031435 | -3.180751 | -1.789036 | C | -0.912996 | 1.259030  | -0.284317 |
| C     | -3.387482 | -2.419718 | -0.609200 | C | 0.848872  | 6.685552  | -0.332235 |
| H     | -4.481553 | -4.100309 | -1.389733 | H | -0.443019 | 6.100577  | -1.947157 |
| H     | -4.834295 | -2.611563 | -2.265978 | C | 1.172434  | 5.037908  | 1.400034  |
| C     | -2.266451 | -3.290581 | 0.008482  | H | 0.168738  | 3.172811  | 1.175990  |
| C     | -4.475632 | -2.267911 | 0.477751  | C | -4.766243 | -2.483813 | -0.218706 |
| H     | -1.446941 | -3.501874 | -0.680723 | C | -5.777625 | -0.304922 | 0.156032  |
| H     | -1.849771 | -2.816913 | 0.901621  | C | 0.575397  | 0.985969  | -0.523375 |
| H     | -2.696968 | -4.255909 | 0.308737  | C | 1.435002  | 6.309310  | 0.880178  |
| H     | -5.398430 | -1.828381 | 0.089776  | H | 1.035648  | 7.672521  | -0.748790 |
| H     | -4.731199 | -3.273102 | 0.841438  | H | 1.611104  | 4.732275  | 2.346669  |
| H     | -4.109746 | -1.671699 | 1.315323  | C | -5.471518 | -2.987100 | 0.879142  |
| O     | -2.680988 | -0.510803 | 2.255187  | H | -4.109280 | -3.119462 | -0.803521 |
| C     | -2.603211 | -1.317138 | 3.392233  | C | -6.469476 | -0.822538 | 1.247462  |
| H     | -1.735697 | -1.080273 | 4.037321  | H | -5.896158 | 0.733953  | -0.135224 |
| H     | -2.496188 | -2.391709 | 3.132164  | H | 0.732433  | 0.494617  | -1.486390 |
| C     | -3.868365 | -1.145775 | 4.245417  | H | 1.161765  | 1.907055  | -0.482442 |
| H     | -4.765353 | -1.425389 | 3.679942  | H | 2.082269  | 6.999595  | 1.415527  |
| H     | -3.819068 | -1.773840 | 5.146398  | C | -6.328124 | -2.169791 | 1.627874  |
| H     | -3.978385 | -0.098988 | 4.554769  | H | -5.352700 | -4.032934 | 1.152711  |
| H     | 2.820546  | -0.072723 | 2.781089  | H | -7.133759 | -0.172929 | 1.813372  |
| H     | 3.117360  | 1.115121  | 1.473484  | C | -7.088424 | -2.712146 | 2.815728  |
| H     | 1.012083  | 2.007078  | 2.122749  | H | -8.170681 | -2.589102 | 2.683553  |
| H     | 0.282982  | -0.814026 | 3.082275  | H | -6.887573 | -3.777441 | 2.968018  |
| H     | -0.610014 | 0.766350  | 3.427474  | H | -6.813354 | -2.183027 | 3.736970  |
|       |           |           |           | H | -1.694511 | 4.209033  | -2.068380 |
|       |           |           |           | C | 3.519543  | -2.690195 | 1.122042  |
| Int 8 |           |           |           | C | 3.468705  | -1.944751 | 2.481091  |
| Pd    | 1.496609  | -0.106055 | 0.952604  | C | 2.429012  | -3.783242 | 1.208693  |
| P     | 3.061151  | -1.396977 | -0.264332 | C | 4.890556  | -3.381167 | 0.977791  |
| C     | -1.448076 | 2.337112  | -1.229863 | H | 4.201243  | -1.144123 | 2.575428  |
| C     | -2.483231 | 1.697820  | -2.132187 | H | 2.472317  | -1.521337 | 2.682407  |
| C     | -1.162009 | 3.652633  | -1.294713 | H | 3.662652  | -2.666108 | 3.286890  |
| N     | -2.985498 | 0.602765  | -1.266672 | H | 2.448635  | -4.476739 | 0.365458  |
| H     | -3.298479 | 2.366210  | -2.413028 | H | 2.608165  | -4.375881 | 2.115795  |
| H     | -2.023957 | 1.300518  | -3.054465 | H | 1.424199  | -3.355995 | 1.289417  |
| C     | -0.250422 | 4.502285  | -0.507841 | H | 5.006515  | -4.110221 | 1.792001  |
| S     | -4.052484 | -0.490128 | -1.995495 | H | 4.989510  | -3.927004 | 0.035850  |
| C     | -1.806068 | 0.029471  | -0.581397 | H | 5.725952  | -2.681112 | 1.054968  |
| C     | 0.015216  | 5.795232  | -1.008429 | H | 3.378321  | -4.361911 | -1.466579 |
| C     | 0.343607  | 4.141866  | 0.721420  | C | 3.417629  | -3.572974 | -2.221235 |
| O     | -3.332432 | -1.612367 | -2.627375 | C | 2.527558  | -2.362056 | -1.866027 |
| O     | -4.973487 | 0.327356  | -2.798426 | H | 4.464626  | -3.299364 | -2.375265 |
| C     | -4.922634 | -1.143510 | -0.567762 | H | 3.052347  | -4.010996 | -3.160301 |

|     |           |           |           |   |           |           |           |
|-----|-----------|-----------|-----------|---|-----------|-----------|-----------|
| C   | 1.070695  | -2.846133 | -1.674409 | O | 3.770161  | -3.159796 | -1.003497 |
| C   | 2.511617  | -1.412363 | -3.087084 | O | 4.384367  | -2.788206 | 1.456599  |
| H   | 0.401837  | -2.020511 | -1.420733 | C | 0.463179  | -1.442793 | 2.216825  |
| H   | 0.718066  | -3.284795 | -2.617074 | C | -0.230367 | -2.500334 | 1.566018  |
| H   | 0.967631  | -3.609332 | -0.902890 | H | -1.224097 | -2.765646 | 1.913695  |
| H   | 2.058716  | -1.949392 | -3.930592 | H | 0.347224  | -3.342512 | 1.196646  |
| H   | 1.909098  | -0.516436 | -2.915101 | O | -1.037786 | 1.041481  | 2.671623  |
| H   | 3.510798  | -1.104541 | -3.402584 | C | -1.807755 | 0.546649  | 3.724096  |
| H   | 5.383462  | -1.262616 | -2.514238 | H | -1.584069 | -0.515822 | 3.966710  |
| C   | 5.719785  | -1.018890 | -1.503452 | H | -2.894400 | 0.564501  | 3.489981  |
| C   | 4.628945  | -0.318416 | -0.666294 | C | -1.574835 | 1.373729  | 4.996016  |
| H   | 6.574918  | -0.336887 | -1.607577 | H | -1.836520 | 2.424867  | 4.824336  |
| H   | 6.090007  | -1.935559 | -1.036950 | H | -2.184551 | 0.996166  | 5.829243  |
| C   | 4.158708  | 0.957106  | -1.407887 | H | -0.518308 | 1.334574  | 5.288472  |
| C   | 5.267925  | 0.180546  | 0.650299  | H | 2.572941  | -1.702975 | 2.583586  |
| H   | 3.691635  | 0.758072  | -2.372727 | H | 2.158034  | -0.184891 | 1.760353  |
| H   | 3.455538  | 1.531967  | -0.799319 | H | -0.391163 | -2.964611 | -2.040125 |
| H   | 5.035204  | 1.592086  | -1.594978 | C | -2.301703 | -3.022258 | -1.066310 |
| H   | 5.763348  | -0.612005 | 1.215800  | C | -3.233018 | -2.529158 | -0.126974 |
| H   | 6.036544  | 0.923039  | 0.398228  | C | -2.741685 | -4.020727 | -1.962784 |
| H   | 4.536371  | 0.676152  | 1.297106  | C | -4.532209 | -3.031020 | -0.073536 |
| O   | 0.537641  | 0.967960  | 2.372140  | H | -2.935481 | -1.731980 | 0.548361  |
| C   | -0.452223 | 0.342091  | 3.141940  | C | -4.043083 | -4.519529 | -1.912594 |
| H   | -0.134231 | -0.655903 | 3.505524  | H | -2.044013 | -4.412676 | -2.700014 |
| H   | -1.380006 | 0.175777  | 2.556680  | C | -4.945799 | -4.029780 | -0.963343 |
| C   | -0.795574 | 1.213388  | 4.355766  | H | -5.229850 | -2.633139 | 0.659439  |
| H   | -1.158165 | 2.195683  | 4.030508  | H | -4.352228 | -5.291139 | -2.613222 |
| H   | -1.573822 | 0.739570  | 4.970281  | H | -5.961168 | -4.415145 | -0.921152 |
| H   | 0.094617  | 1.369101  | 4.976805  | C | 4.603457  | -0.774235 | -0.238276 |
| H   | -2.114449 | -0.499850 | 0.323919  | C | 5.173273  | 0.016176  | 0.766263  |
| H   | -1.287640 | -0.679732 | -1.240304 | C | 4.643379  | -0.367997 | -1.574363 |
| H   | -1.058645 | 1.575052  | 0.750179  | C | 5.775339  | 1.225693  | 0.421957  |
|     |           |           |           | H | 5.164600  | -0.325133 | 1.796441  |
|     |           |           |           | C | 5.251891  | 0.846395  | -1.900090 |
| TS6 |           |           |           | H | 4.226281  | -1.004894 | -2.347819 |
| Pd  | -0.763871 | -0.207206 | 0.997715  | C | 5.824998  | 1.661322  | -0.912924 |
| C   | -0.174451 | -1.826354 | -0.293655 | H | 6.222904  | 1.837115  | 1.202555  |
| C   | 1.311026  | -1.601501 | -0.599323 | H | 5.289615  | 1.158719  | -2.941197 |
| C   | -0.911749 | -2.574948 | -1.159215 | C | 6.503939  | 2.962862  | -1.270989 |
| N   | 2.179396  | -1.956768 | 0.550553  | H | 6.306830  | 3.245635  | -2.310027 |
| H   | 1.627063  | -2.223520 | -1.441920 | H | 6.163144  | 3.781460  | -0.625943 |
| H   | 1.471987  | -0.546143 | -0.872526 | H | 7.592159  | 2.885503  | -1.147895 |
| S   | 3.791412  | -2.319453 | 0.199148  | P | -1.584720 | 1.734823  | -0.550200 |
| C   | 1.917894  | -1.258708 | 1.825738  | C | -0.251605 | 3.160650  | -0.435733 |



|       |           |           |           |    |           |           |           |
|-------|-----------|-----------|-----------|----|-----------|-----------|-----------|
| C     | 0.286918  | 3.232487  | 1.011993  | C  | -2.559150 | 3.673223  | -0.388971 |
| C     | 0.966825  | 2.819448  | -1.323231 | N  | -3.082726 | 0.397868  | 0.830430  |
| C     | -0.753263 | 4.563880  | -0.843612 | H  | -4.291148 | 1.778539  | -0.182952 |
| H     | -0.470068 | 3.494751  | 1.747808  | H  | -3.310584 | 0.744518  | -1.253754 |
| H     | 0.717448  | 2.281607  | 1.336004  | S  | -4.400490 | -0.545632 | 1.311012  |
| H     | 1.074731  | 3.998794  | 1.043490  | C  | -1.757488 | -0.270302 | 0.775803  |
| H     | 0.761864  | 2.920752  | -2.391480 | O  | -5.566573 | 0.347438  | 1.312858  |
| H     | 1.773213  | 3.525155  | -1.083062 | O  | -3.974426 | -1.260298 | 2.518813  |
| H     | 1.352155  | 1.812707  | -1.131371 | C  | -0.668799 | 0.790471  | 0.809995  |
| H     | 0.092731  | 5.263767  | -0.788486 | C  | -0.811505 | 1.807360  | -0.329214 |
| H     | -1.140091 | 4.602679  | -1.864246 | H  | -0.608944 | 1.307693  | -1.296430 |
| H     | -1.524302 | 4.945148  | -0.171380 | H  | -0.084261 | 2.616138  | -0.215994 |
| H     | -1.093381 | 3.160429  | -3.456584 | H  | -1.671454 | -0.939495 | 1.631586  |
| C     | -2.019947 | 2.586078  | -3.375773 | H  | -1.684210 | -0.870653 | -0.148031 |
| C     | -1.870486 | 1.358089  | -2.451136 | H  | -3.618667 | 3.912211  | -0.282980 |
| H     | -2.817700 | 3.265377  | -3.070847 | C  | -1.678071 | 4.853260  | -0.514856 |
| H     | -2.262357 | 2.230062  | -4.387377 | C  | -0.590025 | 4.905387  | -1.406252 |
| C     | -0.692638 | 0.510359  | -2.987519 | C  | -1.963046 | 6.003223  | 0.246788  |
| C     | -3.129615 | 0.474304  | -2.605939 | C  | 0.202298  | 6.051593  | -1.506926 |
| H     | -0.569247 | -0.406897 | -2.412970 | H  | -0.383490 | 4.053758  | -2.048206 |
| H     | -0.917025 | 0.225241  | -4.025053 | C  | -1.169570 | 7.147114  | 0.151470  |
| H     | 0.257096  | 1.044520  | -3.000496 | H  | -2.810633 | 5.989586  | 0.928516  |
| H     | -3.179111 | 0.119970  | -3.644576 | C  | -0.078837 | 7.175062  | -0.723978 |
| H     | -3.096622 | -0.409435 | -1.963600 | H  | 1.033254  | 6.070930  | -2.208175 |
| H     | -4.058294 | 1.013401  | -2.408866 | H  | -1.404440 | 8.018158  | 0.758185  |
| H     | -4.450640 | 2.844754  | -1.661759 | H  | 0.537195  | 8.067036  | -0.803897 |
| C     | -4.079418 | 3.346303  | -0.765081 | C  | -4.675602 | -1.781511 | 0.028369  |
| C     | -3.270814 | 2.418414  | 0.166583  | C  | -3.996929 | -3.003260 | 0.088883  |
| H     | -4.959130 | 3.703308  | -0.211322 | C  | -5.545844 | -1.501832 | -1.028912 |
| H     | -3.513024 | 4.229026  | -1.073580 | C  | -4.191705 | -3.942679 | -0.923927 |
| C     | -4.139144 | 1.190911  | 0.532450  | H  | -3.343621 | -3.219073 | 0.928206  |
| C     | -3.020356 | 3.177607  | 1.489639  | C  | -5.728843 | -2.454447 | -2.033584 |
| H     | -4.383363 | 0.556906  | -0.321405 | H  | -6.088664 | -0.562193 | -1.049103 |
| H     | -3.642423 | 0.575561  | 1.288222  | C  | -5.058705 | -3.686562 | -1.998669 |
| H     | -5.086347 | 1.546580  | 0.961287  | H  | -3.667794 | -4.894812 | -0.872798 |
| H     | -2.581318 | 4.165947  | 1.330634  | H  | -6.411786 | -2.238620 | -2.852297 |
| H     | -3.992067 | 3.336544  | 1.978075  | C  | -5.289226 | -4.728234 | -3.069051 |
| H     | -2.377760 | 2.601229  | 2.160467  | H  | -5.673319 | -4.278590 | -3.990804 |
| H     | 0.165569  | -1.078354 | 3.193514  | H  | -4.365341 | -5.265632 | -3.311286 |
|       |           |           |           | H  | -6.022497 | -5.475635 | -2.737088 |
|       |           |           |           | H  | -0.654221 | 1.294599  | 1.781506  |
| Int 7 |           |           |           | Pd | 1.175996  | -0.019645 | 0.450145  |
| C     | -2.224918 | 2.368441  | -0.360045 | O  | 1.093081  | -1.129147 | 2.142239  |
| C     | -3.311570 | 1.314889  | -0.304165 | C  | 0.662603  | -0.594295 | 3.368543  |

|   |           |           |           |     |           |           |           |
|---|-----------|-----------|-----------|-----|-----------|-----------|-----------|
| H | -0.389031 | -0.264854 | 3.336959  | H   | 4.972337  | -2.234428 | 2.824321  |
| H | 1.265940  | 0.283001  | 3.667248  | H   | 3.305151  | -2.257971 | 2.221314  |
| C | 0.792430  | -1.682818 | 4.440822  |     |           |           |           |
| H | 1.833685  | -2.010289 | 4.542065  |     |           |           |           |
| H | 0.451620  | -1.299282 | 5.411791  | TS2 |           |           |           |
| H | 0.181099  | -2.553441 | 4.177718  | Pd  | 1.347651  | -0.734819 | -0.990321 |
| P | 3.405904  | -0.855786 | -0.373913 | P   | 2.869109  | 0.464402  | 0.796309  |
| C | 3.165440  | -2.585100 | -1.229338 | C   | -0.514224 | 0.373873  | -0.872129 |
| C | 2.236205  | -3.433335 | -0.324282 | C   | -1.512814 | -0.055662 | 0.182964  |
| C | 2.398224  | -2.400771 | -2.558637 | C   | -0.529577 | 1.570511  | -1.521769 |
| C | 4.456494  | -3.378229 | -1.518552 | N   | -1.861370 | -1.452071 | -0.142900 |
| H | 2.697869  | -3.724369 | 0.618412  | H   | -1.097879 | -0.028072 | 1.192244  |
| H | 1.309939  | -2.902261 | -0.083888 | H   | -2.420301 | 0.570218  | 0.152005  |
| H | 1.976048  | -4.355457 | -0.862548 | C   | -1.306319 | 2.803230  | -1.327337 |
| H | 2.991936  | -1.915698 | -3.337128 | S   | -2.887839 | -2.284605 | 0.905966  |
| H | 2.122030  | -3.393511 | -2.938206 | C   | -2.090796 | -1.559359 | -1.586139 |
| H | 1.468848  | -1.837289 | -2.419591 | C   | -1.341535 | 3.716294  | -2.406653 |
| H | 4.192622  | -4.313531 | -2.032353 | C   | -2.010141 | 3.157736  | -0.155236 |
| H | 5.151290  | -2.835194 | -2.165437 | O   | -2.369317 | -2.023146 | 2.252744  |
| H | 4.988138  | -3.655193 | -0.604953 | O   | -3.001061 | -3.641564 | 0.360841  |
| H | 4.819926  | -0.911678 | -3.284960 | C   | -4.513592 | -1.520187 | 0.793425  |
| C | 5.167817  | -0.100294 | -2.640648 | C   | -0.811006 | -1.117502 | -2.288242 |
| C | 4.069716  | 0.414786  | -1.687806 | C   | -2.068849 | 4.902557  | -2.337689 |
| H | 6.053631  | -0.450186 | -2.103488 | H   | -0.789929 | 3.478294  | -3.313691 |
| H | 5.486347  | 0.719848  | -3.299760 | C   | -2.736353 | 4.347304  | -0.085225 |
| C | 2.854136  | 0.893334  | -2.520217 | H   | -1.967680 | 2.524439  | 0.722340  |
| C | 4.601422  | 1.678814  | -0.973545 | C   | -4.853855 | -0.485303 | 1.667743  |
| H | 2.081966  | 1.334659  | -1.875283 | C   | -5.419018 | -1.960179 | -0.179269 |
| H | 3.181512  | 1.679600  | -3.214422 | C   | 0.309068  | -1.976352 | -2.337901 |
| H | 2.389919  | 0.105854  | -3.114135 | C   | -2.776866 | 5.222976  | -1.174533 |
| H | 4.799223  | 2.448287  | -1.732142 | H   | -2.079744 | 5.579091  | -3.188499 |
| H | 3.870503  | 2.092451  | -0.270676 | H   | -3.264051 | 4.596621  | 0.832074  |
| H | 5.538242  | 1.506341  | -0.439903 | C   | -6.108879 | 0.118094  | 1.555581  |
| H | 6.534564  | -0.219591 | 0.120089  | H   | -4.156541 | -0.178575 | 2.440803  |
| C | 6.177454  | -1.125529 | 0.617390  | C   | -6.666313 | -1.345301 | -0.276850 |
| C | 4.703128  | -1.025286 | 1.059597  | H   | -5.157521 | -2.790333 | -0.827797 |
| H | 6.803655  | -1.269152 | 1.509173  | H   | -3.341368 | 6.149597  | -1.112731 |
| H | 6.360806  | -1.973431 | -0.048515 | C   | -7.031185 | -0.295950 | 0.583921  |
| C | 4.525972  | 0.193307  | 1.999417  | H   | -6.377315 | 0.916830  | 2.243081  |
| C | 4.355593  | -2.265226 | 1.915569  | H   | -7.373468 | -1.694193 | -1.026404 |
| H | 4.789786  | 1.144990  | 1.536433  | C   | -8.388134 | 0.357631  | 0.463589  |
| H | 3.496804  | 0.257899  | 2.364530  | H   | -8.541198 | 1.110523  | 1.243240  |
| H | 5.185900  | 0.060808  | 2.867878  | H   | -8.503418 | 0.853418  | -0.508747 |
| H | 4.583583  | -3.207156 | 1.410380  | H   | -9.193789 | -0.382190 | 0.546603  |

|   |          |           |           |       |           |           |           |
|---|----------|-----------|-----------|-------|-----------|-----------|-----------|
| H | 0.141040 | 1.636728  | -2.381034 | C     | 4.416403  | -3.465593 | -2.615355 |
| C | 4.036229 | 1.706935  | -0.147410 | H     | 5.318809  | -3.148493 | -2.079270 |
| C | 4.445412 | 1.059234  | -1.491047 | H     | 4.491838  | -4.545457 | -2.807678 |
| C | 3.245855 | 2.985286  | -0.508574 | H     | 4.394511  | -2.939668 | -3.577863 |
| C | 5.312146 | 2.136370  | 0.609042  | H     | -2.316520 | -2.598826 | -1.835213 |
| H | 5.042538 | 0.156817  | -1.373597 | H     | -2.929281 | -0.918304 | -1.905208 |
| H | 3.573659 | 0.782674  | -2.090756 | H     | -0.958886 | -0.453629 | -3.134390 |
| H | 5.039769 | 1.790818  | -2.057068 | H     | 0.267308  | -2.915388 | -1.787315 |
| H | 3.076144 | 3.636326  | 0.352723  | H     | 0.940335  | -1.965947 | -3.222622 |
| H | 3.835498 | 3.562085  | -1.233957 |       |           |           |           |
| H | 2.281343 | 2.759679  | -0.974822 |       |           |           |           |
| H | 5.856661 | 2.863559  | -0.010378 | Int 3 |           |           |           |
| H | 5.099112 | 2.620110  | 1.565078  | Pd    | -1.862522 | -0.603616 | 1.155770  |
| H | 5.992536 | 1.302909  | 0.793999  | P     | -3.501828 | -0.898986 | -0.520233 |
| H | 3.286340 | 3.211541  | 2.532015  | C     | 1.072178  | 1.189965  | 0.088009  |
| C | 2.908331 | 2.361154  | 3.106188  | C     | 2.146978  | 1.428636  | -0.946683 |
| C | 2.001474 | 1.447147  | 2.252910  | C     | 0.290702  | 2.107790  | 0.686215  |
| H | 3.758899 | 1.845644  | 3.552808  | N     | 3.103518  | 0.332917  | -0.645864 |
| H | 2.307049 | 2.775156  | 3.928721  | H     | 2.646335  | 2.394055  | -0.849768 |
| C | 0.881081 | 2.338096  | 1.675739  | H     | 1.754111  | 1.346270  | -1.975618 |
| C | 1.293329 | 0.433629  | 3.183665  | C     | 0.191572  | 3.552784  | 0.428594  |
| H | 0.204261 | 1.766385  | 1.047032  | S     | 4.347117  | 0.113229  | -1.773608 |
| H | 0.302625 | 2.757940  | 2.510607  | C     | 2.318003  | -0.862639 | -0.275272 |
| H | 1.249128 | 3.177559  | 1.086873  | C     | 0.510072  | 4.163489  | -0.801754 |
| H | 0.648214 | 0.988721  | 3.878289  | C     | -0.279580 | 4.382527  | 1.468314  |
| H | 0.655621 | -0.263989 | 2.631191  | O     | 3.955687  | -0.837262 | -2.831606 |
| H | 1.985178 | -0.151265 | 3.791237  | O     | 4.797239  | 1.464122  | -2.138749 |
| H | 3.963149 | -0.290022 | 3.786363  | C     | 5.604979  | -0.684339 | -0.771434 |
| C | 4.661671 | -0.500419 | 2.973989  | C     | 1.094988  | -0.286249 | 0.494426  |
| C | 3.976217 | -0.908701 | 1.651602  | C     | 0.394286  | 5.545073  | -0.970965 |
| H | 5.285999 | -1.342871 | 3.302900  | H     | 0.824454  | 3.556860  | -1.644913 |
| H | 5.323853 | 0.362136  | 2.854134  | C     | -0.392258 | 5.762478  | 1.301184  |
| C | 3.058819 | -2.128746 | 1.909153  | H     | -0.547121 | 3.928928  | 2.420139  |
| C | 5.091547 | -1.391454 | 0.696889  | C     | 5.960052  | -2.006444 | -1.033788 |
| H | 2.242445 | -1.922952 | 2.603685  | C     | 6.240686  | 0.046401  | 0.238570  |
| H | 2.628820 | -2.495753 | 0.974035  | C     | -0.152242 | -1.109284 | 0.148257  |
| H | 3.663028 | -2.936714 | 2.344836  | C     | -0.050956 | 6.353114  | 0.079477  |
| H | 5.894051 | -0.658316 | 0.580670  | H     | 0.647091  | 5.989608  | -1.930618 |
| H | 5.544574 | -2.291094 | 1.137005  | H     | -0.748073 | 6.377886  | 2.124099  |
| H | 4.681099 | -1.647169 | -0.280883 | C     | 6.961976  | -2.606529 | -0.264297 |
| O | 3.066962 | -1.771083 | -1.574273 | H     | 5.463960  | -2.549494 | -1.831719 |
| C | 3.151127 | -3.144656 | -1.805926 | C     | 7.234401  | -0.567948 | 0.995579  |
| H | 2.289716 | -3.547802 | -2.371762 | H     | 5.959514  | 1.078451  | 0.423083  |
| H | 3.181995 | -3.724813 | -0.859101 | H     | -0.007685 | -2.157761 | 0.442445  |

|   |           |           |           |       |           |           |           |
|---|-----------|-----------|-----------|-------|-----------|-----------|-----------|
| H | -0.355677 | -1.059765 | -0.923567 | H     | -1.455219 | 1.042520  | -1.541099 |
| H | -0.139162 | 7.428225  | -0.054786 | H     | -2.208726 | 1.701796  | -3.000116 |
| C | 7.611712  | -1.902465 | 0.757767  | H     | -4.990904 | 1.904453  | -0.664444 |
| H | 7.241936  | -3.637502 | -0.467807 | H     | -3.818898 | 2.731698  | -1.685486 |
| H | 7.730089  | -0.002991 | 1.782135  | H     | -3.292750 | 2.049126  | -0.146470 |
| C | 8.697650  | -2.548763 | 1.586230  | O     | -0.891754 | -0.185559 | 2.863529  |
| H | 9.653109  | -2.022523 | 1.465683  | C     | -0.363991 | -1.200792 | 3.671364  |
| H | 8.852420  | -3.593850 | 1.299536  | H     | -1.114733 | -1.980531 | 3.904060  |
| H | 8.448921  | -2.525502 | 2.654622  | H     | 0.475813  | -1.721339 | 3.165891  |
| H | -0.327268 | 1.741889  | 1.506125  | C     | 0.154633  | -0.605112 | 4.984605  |
| C | -5.096753 | -0.880284 | 0.605082  | H     | 0.933045  | 0.140971  | 4.785048  |
| C | -4.871449 | 0.182793  | 1.711897  | H     | 0.576447  | -1.388079 | 5.630170  |
| C | -5.237038 | -2.228696 | 1.349831  | H     | -0.659612 | -0.108587 | 5.525892  |
| C | -6.427387 | -0.580021 | -0.114320 | H     | 2.923212  | -1.534045 | 0.341137  |
| H | -4.769128 | 1.199028  | 1.333047  | H     | 1.994948  | -1.411816 | -1.172105 |
| H | -3.987794 | -0.039619 | 2.328190  | H     | 1.274837  | -0.349850 | 1.570697  |
| H | -5.734282 | 0.169298  | 2.392005  |       |           |           |           |
| H | -5.534420 | -3.052447 | 0.697562  |       |           |           |           |
| H | -6.023361 | -2.120807 | 2.108830  | Int 4 |           |           |           |
| H | -4.315929 | -2.507975 | 1.871821  | C     | -1.440586 | -1.148351 | 0.598013  |
| H | -7.246358 | -0.646569 | 0.615533  | C     | -0.661204 | -0.824844 | -0.668263 |
| H | -6.645232 | -1.292987 | -0.913784 | C     | -2.668455 | -0.702879 | 0.969179  |
| H | -6.458646 | 0.426842  | -0.537662 | N     | 0.519683  | -1.717927 | -0.586328 |
| H | -5.567723 | -3.222764 | -1.335311 | H     | -1.215398 | -1.038444 | -1.587597 |
| C | -4.824943 | -3.003717 | -2.105502 | H     | -0.345500 | 0.226823  | -0.696135 |
| C | -3.464166 | -2.568609 | -1.519207 | C     | -3.591611 | 0.219946  | 0.310340  |
| H | -5.248396 | -2.260599 | -2.786343 | S     | 1.975633  | -1.286784 | -1.340930 |
| H | -4.678899 | -3.928227 | -2.681104 | C     | 0.501672  | -2.361887 | 0.663276  |
| C | -2.937114 | -3.680621 | -0.579971 | C     | -4.857578 | 0.419662  | 0.907766  |
| C | -2.455183 | -2.481926 | -2.688472 | C     | -3.319767 | 0.936075  | -0.877019 |
| H | -1.958452 | -3.424460 | -0.164834 | O     | 1.597056  | -0.864007 | -2.690957 |
| H | -2.827243 | -4.605902 | -1.161841 | O     | 2.884190  | -2.407833 | -1.086820 |
| H | -3.607150 | -3.898061 | 0.252090  | C     | 2.608684  | 0.154173  | -0.476249 |
| H | -2.364174 | -3.481468 | -3.133820 | C     | -0.622610 | -2.087882 | 1.365699  |
| H | -1.456494 | -2.184471 | -2.358711 | C     | -5.803219 | 1.277451  | 0.352029  |
| H | -2.777000 | -1.806644 | -3.483932 | H     | -5.094660 | -0.115871 | 1.824693  |
| H | -4.302022 | -0.397227 | -3.611677 | C     | -4.268036 | 1.795834  | -1.433411 |
| C | -4.584526 | 0.413790  | -2.935710 | H     | -2.364052 | 0.836480  | -1.376398 |
| C | -3.590808 | 0.587612  | -1.767980 | C     | 2.344680  | 1.430908  | -0.976905 |
| H | -4.591649 | 1.337410  | -3.530697 | C     | 3.333109  | -0.015493 | 0.709503  |
| H | -5.609085 | 0.235737  | -2.599051 | C     | -1.009266 | -2.685241 | 2.684111  |
| C | -2.171300 | 0.825999  | -2.338353 | C     | -5.514536 | 1.972690  | -0.827103 |
| C | -3.952625 | 1.881869  | -1.003629 | H     | -6.767236 | 1.403973  | 0.838682  |
| H | -1.790727 | -0.007802 | -2.929480 | H     | -4.027770 | 2.331802  | -2.348478 |

|     |           |           |           |    |           |           |           |
|-----|-----------|-----------|-----------|----|-----------|-----------|-----------|
| C   | 2.809243  | 2.546292  | -0.275690 | C  | 0.899477  | -1.074975 | 3.208761  |
| H   | 1.807880  | 1.545298  | -1.913150 | H  | 1.364723  | -1.877127 | 3.790997  |
| C   | 3.786823  | 1.109136  | 1.394366  | H  | 1.123203  | -0.126592 | 3.717533  |
| H   | 3.556839  | -1.012967 | 1.073833  | H  | -0.188454 | -1.214392 | 3.249011  |
| H   | -0.228609 | -3.356081 | 3.057143  | C  | 0.990610  | -0.145647 | 0.735343  |
| H   | -1.176679 | -1.907100 | 3.440499  | C  | 0.506405  | 1.174344  | 1.024354  |
| H   | -6.249274 | 2.642822  | -1.265452 | H  | 0.510323  | 1.417197  | 2.086406  |
| C   | 3.531453  | 2.406533  | 0.917236  | C  | 0.806768  | 2.359210  | 0.168293  |
| H   | 2.611451  | 3.540307  | -0.669700 | C  | 1.305223  | 3.521467  | 0.781973  |
| H   | 4.357178  | 0.978106  | 2.311449  | C  | 0.638750  | 2.361381  | -1.227467 |
| C   | 4.038988  | 3.613173  | 1.671051  | C  | 1.644090  | 4.645614  | 0.025437  |
| H   | 5.134494  | 3.608288  | 1.733498  | H  | 1.434712  | 3.542350  | 1.862183  |
| H   | 3.735238  | 4.546014  | 1.185893  | C  | 0.978914  | 3.484034  | -1.984785 |
| H   | 3.656598  | 3.628021  | 2.699213  | H  | 0.219323  | 1.487629  | -1.718769 |
| H   | -3.045739 | -1.098906 | 1.910980  | C  | 1.484337  | 4.630576  | -1.363167 |
| H   | 1.310299  | -3.037749 | 0.909752  | H  | 2.030280  | 5.532274  | 0.522014  |
| H   | -1.939648 | -3.263840 | 2.605102  | H  | 0.840718  | 3.464116  | -3.062905 |
|     |           |           |           | H  | 1.744072  | 5.504840  | -1.954351 |
|     |           |           |           | Pd | -1.211896 | -0.188451 | 0.324421  |
| TS7 |           |           |           | P  | -3.596760 | 0.142520  | 0.022126  |
| S   | 4.022808  | -2.106201 | -0.793944 | C  | -4.210915 | -0.695397 | -1.626230 |
| O   | 3.809950  | -2.006667 | -2.239093 | C  | -3.162063 | -0.390873 | -2.725908 |
| O   | 4.470240  | -3.341918 | -0.143822 | C  | -4.208849 | -2.232692 | -1.465472 |
| C   | 5.155670  | -0.792531 | -0.323190 | C  | -5.611578 | -0.265120 | -2.111615 |
| C   | 5.349720  | 0.293061  | -1.181118 | H  | -3.054187 | 0.672781  | -2.944485 |
| C   | 6.201950  | 1.327790  | -0.788381 | H  | -2.190355 | -0.809724 | -2.449343 |
| C   | 6.866544  | 1.294163  | 0.445869  | H  | -3.489533 | -0.880911 | -3.653867 |
| C   | 6.655247  | 0.188504  | 1.287309  | H  | -4.990747 | -2.597044 | -0.794430 |
| C   | 5.807619  | -0.853026 | 0.913780  | H  | -4.406340 | -2.671820 | -2.453111 |
| H   | 4.857332  | 0.313526  | -2.147975 | H  | -3.228424 | -2.583134 | -1.137741 |
| H   | 6.355831  | 2.170877  | -1.457932 | H  | -5.860156 | -0.857222 | -3.003176 |
| H   | 7.168537  | 0.138268  | 2.245251  | H  | -6.394703 | -0.452443 | -1.371161 |
| H   | 5.669155  | -1.713733 | 1.560176  | H  | -5.661811 | 0.785962  | -2.406340 |
| C   | 7.812340  | 2.400266  | 0.852487  | H  | -6.207740 | -1.669210 | 0.552749  |
| H   | 7.680229  | 2.673102  | 1.905945  | C  | -6.004004 | -0.955783 | 1.354255  |
| H   | 8.857910  | 2.088575  | 0.726797  | C  | -4.495464 | -0.684337 | 1.537482  |
| H   | 7.661135  | 3.299810  | 0.246902  | H  | -6.577639 | -0.047186 | 1.155684  |
| N   | 2.529658  | -1.743935 | -0.087262 | H  | -6.397191 | -1.394019 | 2.282447  |
| C   | 1.754949  | -0.553772 | -0.529493 | C  | -3.775366 | -2.021224 | 1.836345  |
| H   | 2.424130  | 0.244495  | -0.874435 | C  | -4.311339 | 0.187788  | 2.799964  |
| H   | 1.094793  | -0.858329 | -1.346091 | H  | -2.708456 | -1.862326 | 2.025562  |
| C   | 2.305457  | -1.947467 | 1.283606  | H  | -4.220904 | -2.465451 | 2.737427  |
| H   | 2.804564  | -2.772861 | 1.774709  | H  | -3.861049 | -2.749532 | 1.030878  |
| C   | 1.402228  | -1.081342 | 1.796058  | H  | -4.656517 | -0.387874 | 3.669388  |

|       |           |           |           |    |           |           |           |
|-------|-----------|-----------|-----------|----|-----------|-----------|-----------|
| H     | -3.260129 | 0.442130  | 2.971161  | N  | -2.088820 | -1.551704 | -0.100846 |
| H     | -4.897499 | 1.109564  | 2.773980  | C  | -1.330435 | -0.568245 | 0.703208  |
| H     | -5.937456 | 2.069597  | 1.190492  | H  | -2.011650 | 0.213985  | 1.067169  |
| C     | -5.614670 | 2.296428  | 0.170862  | C  | -1.777311 | -1.373387 | -1.444975 |
| C     | -4.106307 | 2.030625  | -0.039272 | H  | -2.294068 | -1.966829 | -2.188914 |
| H     | -5.809032 | 3.365298  | 0.005422  | C  | -0.769865 | -0.480585 | -1.624720 |
| H     | -6.250808 | 1.739972  | -0.519746 | C  | -0.155510 | -0.159899 | -2.957421 |
| C     | -3.329374 | 2.841892  | 1.025933  | H  | -0.729374 | -0.618673 | -3.770307 |
| C     | -3.682788 | 2.636963  | -1.397242 | H  | -0.114772 | 0.920079  | -3.151533 |
| H     | -3.469590 | 2.483947  | 2.045829  | H  | 0.874397  | -0.535206 | -3.018761 |
| H     | -2.257703 | 2.857067  | 0.813339  | C  | -0.324196 | 0.031391  | -0.310214 |
| H     | -3.685398 | 3.880685  | 0.990111  | C  | -0.091988 | 1.547706  | -0.165929 |
| H     | -4.280515 | 2.277070  | -2.236502 | H  | 0.465028  | 1.736095  | 0.754295  |
| H     | -3.819164 | 3.725695  | -1.345814 | C  | -1.337745 | 2.428635  | -0.143073 |
| H     | -2.625874 | 2.451445  | -1.613298 | C  | -1.693027 | 3.111653  | 1.030289  |
| O     | -1.074099 | -1.941581 | -0.819437 | C  | -2.134558 | 2.617959  | -1.283588 |
| C     | -0.798036 | -3.194049 | -0.265012 | C  | -2.804215 | 3.960017  | 1.067912  |
| H     | -1.703119 | -3.645096 | 0.198661  | H  | -1.087795 | 2.983208  | 1.925863  |
| H     | -0.043589 | -3.143527 | 0.542658  | C  | -3.245375 | 3.464491  | -1.252343 |
| C     | -0.284381 | -4.155835 | -1.343986 | H  | -1.885974 | 2.100835  | -2.205901 |
| H     | 0.645400  | -3.778422 | -1.784658 | C  | -3.584629 | 4.140829  | -0.076282 |
| H     | -0.088244 | -5.151298 | -0.920284 | H  | -3.055050 | 4.480625  | 1.989132  |
| H     | -1.024097 | -4.260733 | -2.147598 | H  | -3.845328 | 3.597802  | -2.149442 |
| H     | -1.089579 | 1.210555  | 1.093151  | H  | -4.446875 | 4.802556  | -0.053665 |
|       |           |           |           | H  | 0.549782  | 1.869058  | -0.990094 |
|       |           |           |           | H  | -0.870528 | -1.076482 | 1.549966  |
| Int 9 |           |           |           | Pd | 1.578399  | -0.927253 | 0.034849  |
| S     | -3.527497 | -2.245474 | 0.428788  | P  | 3.572155  | 0.481035  | 0.100119  |
| O     | -3.324874 | -2.550527 | 1.846094  | C  | 4.881098  | -0.868120 | -0.456155 |
| O     | -3.854398 | -3.273917 | -0.564850 | C  | 4.411401  | -2.250824 | 0.063286  |
| C     | -4.800165 | -0.979029 | 0.330102  | C  | 4.876362  | -0.985052 | -1.997918 |
| C     | -5.078411 | -0.190804 | 1.448793  | C  | 6.332802  | -0.641068 | 0.014975  |
| C     | -6.063588 | 0.795190  | 1.358583  | H  | 4.379257  | -2.328450 | 1.149213  |
| C     | -6.778022 | 1.003334  | 0.170659  | H  | 3.420391  | -2.522156 | -0.323846 |
| C     | -6.478795 | 0.193776  | -0.938275 | H  | 5.114080  | -3.014115 | -0.299298 |
| C     | -5.498967 | -0.794604 | -0.868073 | H  | 5.345927  | -0.133974 | -2.495811 |
| H     | -4.547540 | -0.364089 | 2.379274  | H  | 5.451887  | -1.877375 | -2.278273 |
| H     | -6.283348 | 1.406705  | 2.230625  | H  | 3.863234  | -1.112396 | -2.393700 |
| H     | -7.028603 | 0.332109  | -1.867000 | H  | 6.967988  | -1.428120 | -0.415383 |
| H     | -5.293157 | -1.433792 | -1.720666 | H  | 6.743647  | 0.318891  | -0.305282 |
| C     | -7.863591 | 2.051013  | 0.085464  | H  | 6.434606  | -0.710269 | 1.100889  |
| H     | -7.838526 | 2.725078  | 0.947813  | H  | 5.922624  | 1.708984  | -1.773507 |
| H     | -7.763318 | 2.657567  | -0.822537 | C  | 5.383091  | 2.456425  | -1.187825 |
| H     | -8.858137 | 1.586400  | 0.055969  | C  | 3.899643  | 2.087870  | -0.968239 |

|     |           |           |           |    |           |           |           |
|-----|-----------|-----------|-----------|----|-----------|-----------|-----------|
| H   | 5.923776  | 2.613253  | -0.251251 | H  | 5.733026  | -2.370293 | -2.476366 |
| H   | 5.429224  | 3.398181  | -1.752875 | H  | 6.983517  | -1.542073 | 1.556244  |
| C   | 3.234771  | 1.885471  | -2.350745 | H  | 4.655359  | -1.858642 | 2.346713  |
| C   | 3.209196  | 3.314064  | -0.325932 | C  | 7.955675  | -1.776674 | -0.988048 |
| H   | 2.177551  | 1.626517  | -2.258940 | H  | 8.528696  | -2.693472 | -0.794781 |
| H   | 3.303621  | 2.824659  | -2.916741 | H  | 8.006478  | -1.577089 | -2.063283 |
| H   | 3.714533  | 1.110279  | -2.948904 | H  | 8.464535  | -0.959599 | -0.464560 |
| H   | 3.275683  | 4.153596  | -1.030991 | N  | 1.552653  | -0.893267 | 0.969225  |
| H   | 2.149588  | 3.145139  | -0.124350 | C  | 1.009306  | -0.224157 | -0.150091 |
| H   | 3.690878  | 3.637275  | 0.599289  | H  | 1.298421  | -0.573747 | -1.135876 |
| H   | 5.077414  | 2.794422  | 1.829108  | C  | 1.693433  | 0.019953  | 2.029140  |
| C   | 5.163250  | 1.788735  | 2.247702  | H  | 1.981759  | -0.337418 | 3.007520  |
| C   | 3.920307  | 0.916679  | 1.971408  | C  | 1.321145  | 1.263758  | 1.612014  |
| H   | 5.276841  | 1.904571  | 3.334730  | C  | 1.363313  | 2.523032  | 2.424222  |
| H   | 6.086495  | 1.341298  | 1.871617  | H  | 1.577295  | 2.307358  | 3.476574  |
| C   | 2.668025  | 1.631388  | 2.533866  | H  | 2.144746  | 3.197523  | 2.050989  |
| C   | 4.053348  | -0.387351 | 2.791739  | H  | 0.412904  | 3.060092  | 2.364860  |
| H   | 2.451018  | 2.582825  | 2.045814  | C  | 0.899505  | 1.171307  | 0.216312  |
| H   | 1.785349  | 0.988905  | 2.453437  | C  | 0.924235  | 2.327539  | -0.763714 |
| H   | 2.832301  | 1.841154  | 3.599775  | H  | 0.577585  | 1.967442  | -1.742919 |
| H   | 4.988908  | -0.918196 | 2.601689  | C  | 2.282815  | 2.999060  | -0.942098 |
| H   | 4.044991  | -0.125258 | 3.858342  | C  | 3.477775  | 2.266702  | -1.002421 |
| H   | 3.215446  | -1.070341 | 2.615937  | C  | 2.351260  | 4.392294  | -1.093662 |
| O   | 0.659007  | -2.678967 | 0.446046  | C  | 4.703344  | 2.905112  | -1.213421 |
| C   | 0.504450  | -3.661460 | -0.530094 | H  | 3.456060  | 1.186622  | -0.876225 |
| H   | 1.472073  | -3.942922 | -0.996655 | C  | 3.573727  | 5.035935  | -1.307632 |
| H   | -0.147021 | -3.305764 | -1.355594 | H  | 1.435383  | 4.977348  | -1.041173 |
| C   | -0.131522 | -4.915462 | 0.082348  | C  | 4.756700  | 4.293616  | -1.368589 |
| H   | -1.110409 | -4.679061 | 0.511871  | H  | 5.616900  | 2.316428  | -1.254438 |
| H   | -0.263273 | -5.694635 | -0.681399 | H  | 3.601244  | 6.117122  | -1.420807 |
| H   | 0.506353  | -5.313473 | 0.880749  | H  | 5.709432  | 4.791486  | -1.530854 |
|     |           |           |           | H  | 0.180211  | 3.065419  | -0.438972 |
|     |           |           |           | Pd | -1.281036 | 0.551499  | 0.112135  |
| TS8 |           |           |           | P  | -3.293229 | -0.653288 | -0.410704 |
| S   | 2.203176  | -2.460432 | 0.934070  | C  | -4.728378 | 0.482270  | -1.087196 |
| O   | 1.452898  | -3.166694 | -0.107175 | C  | -4.802534 | 1.760584  | -0.220661 |
| O   | 2.235174  | -2.903944 | 2.327735  | C  | -4.360564 | 0.964232  | -2.509424 |
| C   | 3.891826  | -2.263415 | 0.367961  | C  | -6.127463 | -0.168903 | -1.126676 |
| C   | 4.184757  | -2.418167 | -0.989225 | H  | -5.174216 | 1.568471  | 0.786536  |
| C   | 5.501064  | -2.246549 | -1.421221 | H  | -3.826759 | 2.253770  | -0.145771 |
| C   | 6.527685  | -1.927839 | -0.519253 | H  | -5.512594 | 2.451613  | -0.696951 |
| C   | 6.201573  | -1.783281 | 0.839852  | H  | -4.423577 | 0.176634  | -3.263711 |
| C   | 4.894096  | -1.952139 | 1.292317  | H  | -5.075708 | 1.744739  | -2.800869 |
| H   | 3.399872  | -2.687086 | -1.688841 | H  | -3.361464 | 1.411467  | -2.540876 |

|   |           |           |           |   |           |           |           |
|---|-----------|-----------|-----------|---|-----------|-----------|-----------|
| H | -6.829108 | 0.548131  | -1.575766 | C | 2.458708  | 0.089528  | -0.591944 |
| H | -6.169236 | -1.082849 | -1.723096 | C | 2.138899  | 1.442953  | -0.722696 |
| H | -6.505523 | -0.396177 | -0.126261 | C | 2.866291  | 2.382226  | 0.007627  |
| H | -4.690151 | -1.886535 | -3.068467 | C | 3.909911  | 1.991680  | 0.861357  |
| C | -4.134501 | -2.613384 | -2.471392 | C | 4.208888  | 0.624381  | 0.968072  |
| C | -2.898202 | -1.996598 | -1.779722 | C | 3.493356  | -0.330991 | 0.246764  |
| H | -4.827794 | -3.079554 | -1.766856 | H | 1.344198  | 1.753383  | -1.393258 |
| H | -3.793407 | -3.398575 | -3.160351 | H | 2.621225  | 3.437040  | -0.092738 |
| C | -2.004797 | -1.351564 | -2.868377 | H | 5.016823  | 0.301083  | 1.620378  |
| C | -2.066743 | -3.153156 | -1.180230 | H | 3.740752  | -1.384985 | 0.320576  |
| H | -1.084204 | -0.945571 | -2.440010 | C | 4.714133  | 3.020714  | 1.620174  |
| H | -1.724810 | -2.128320 | -3.593293 | H | 5.572594  | 3.360873  | 1.025345  |
| H | -2.498152 | -0.551730 | -3.420813 | H | 4.111977  | 3.903777  | 1.859135  |
| H | -1.733632 | -3.798113 | -2.004405 | H | 5.107235  | 2.611577  | 2.556926  |
| H | -1.167726 | -2.806352 | -0.664858 | N | 0.215996  | -1.554813 | -0.492729 |
| H | -2.640027 | -3.783011 | -0.496664 | C | -0.945342 | -0.799975 | -0.341055 |
| H | -4.442812 | -3.573083 | 0.402134  | H | -1.190482 | -0.021675 | -1.047151 |
| C | -4.891954 | -2.742529 | 0.951549  | C | 0.290527  | -2.489657 | 0.538359  |
| C | -3.907573 | -1.577170 | 1.187974  | H | 1.118489  | -3.181245 | 0.591065  |
| H | -5.206712 | -3.137892 | 1.927485  | C | -0.837690 | -2.363294 | 1.308414  |
| H | -5.795456 | -2.430838 | 0.420904  | C | -1.208363 | -3.206409 | 2.494094  |
| C | -2.663226 | -2.107426 | 1.941202  | H | -0.429353 | -3.944615 | 2.712422  |
| C | -4.582823 | -0.566003 | 2.141371  | H | -1.350228 | -2.596081 | 3.396059  |
| H | -2.101048 | -2.857505 | 1.384316  | H | -2.145880 | -3.753468 | 2.326677  |
| H | -1.978005 | -1.291092 | 2.193196  | C | -1.624168 | -1.285658 | 0.748202  |
| H | -2.994761 | -2.573482 | 2.879353  | C | -2.967864 | -0.831029 | 1.270195  |
| H | -5.563788 | -0.239708 | 1.788113  | H | -3.681151 | -1.665566 | 1.201596  |
| H | -4.736725 | -1.058451 | 3.111076  | C | -3.544204 | 0.377744  | 0.559143  |
| H | -3.960764 | 0.316627  | 2.314525  | C | -4.337236 | 0.226015  | -0.587422 |
| O | -1.854084 | 2.525608  | 0.616872  | C | -3.284928 | 1.675095  | 1.024023  |
| C | -2.302834 | 2.829921  | 1.899188  | C | -4.855378 | 1.339467  | -1.254632 |
| H | -1.660126 | 2.392609  | 2.692086  | H | -4.549755 | -0.773631 | -0.961332 |
| H | -3.319894 | 2.428937  | 2.095450  | C | -3.801843 | 2.792151  | 0.361992  |
| C | -2.359035 | 4.351249  | 2.103778  | H | -2.673471 | 1.810622  | 1.914173  |
| H | -3.025749 | 4.807911  | 1.362026  | C | -4.589110 | 2.627469  | -0.781334 |
| H | -2.728702 | 4.603414  | 3.108343  | H | -3.593465 | 3.789558  | 0.741783  |
| H | -1.364361 | 4.797865  | 1.977326  | H | -4.994651 | 3.494582  | -1.296495 |
| H | -0.407282 | -0.766034 | -0.277429 | H | -2.876434 | -0.609466 | 2.343079  |
|   |           |           |           | H | -5.469030 | 1.200055  | -2.141260 |

2a

|   |          |           |           |        |           |           |           |
|---|----------|-----------|-----------|--------|-----------|-----------|-----------|
| S | 1.521280 | -1.129241 | -1.513419 | Int 10 |           |           |           |
| O | 0.914256 | -0.467307 | -2.667364 | Pd     | -1.345212 | 0.096031  | -0.134759 |
| O | 2.330824 | -2.342034 | -1.631281 | P      | -3.513272 | -0.548225 | 0.508168  |



|   |           |           |           |   |           |           |           |
|---|-----------|-----------|-----------|---|-----------|-----------|-----------|
| C | -3.705642 | -2.410396 | -0.025226 | C | 5.705216  | -0.871756 | 0.689581  |
| C | -3.033924 | -2.581534 | -1.409739 | C | 6.237528  | -0.093169 | 1.716914  |
| C | -2.926821 | -3.328436 | 0.943555  | C | 5.519848  | 0.140880  | 2.901227  |
| C | -5.161266 | -2.919102 | -0.106152 | C | 4.243673  | -0.428473 | 3.029391  |
| H | -3.502536 | -1.991993 | -2.197530 | C | 3.695691  | -1.213905 | 2.013410  |
| H | -1.975350 | -2.304333 | -1.368489 | H | 6.269122  | -1.057093 | -0.218386 |
| H | -3.097853 | -3.639328 | -1.699890 | H | 7.230370  | 0.335091  | 1.597701  |
| H | -3.394693 | -3.406591 | 1.927801  | H | 3.672792  | -0.267214 | 3.941079  |
| H | -2.908710 | -4.339498 | 0.515454  | H | 2.717763  | -1.668642 | 2.133446  |
| H | -1.889593 | -3.004795 | 1.068929  | C | 6.124891  | 0.956342  | 4.020343  |
| H | -5.142813 | -3.985509 | -0.369814 | H | 6.846802  | 0.359147  | 4.593511  |
| H | -5.695459 | -2.828874 | 0.843034  | H | 6.661653  | 1.830495  | 3.634375  |
| H | -5.743539 | -2.409161 | -0.876735 | H | 5.359811  | 1.307904  | 4.720383  |
| C | -3.804285 | -0.406911 | 2.435637  | N | 2.797304  | -1.418239 | -1.436584 |
| C | -5.035246 | -1.196298 | 2.938291  | C | 3.296130  | -1.003297 | -2.755380 |
| C | -2.567618 | -0.895424 | 3.227094  | C | 3.873991  | 0.395363  | -2.875953 |
| C | -3.978487 | 1.079495  | 2.823112  | C | 4.036224  | 1.226541  | -1.842201 |
| H | -5.958458 | -0.935331 | 2.417853  | H | 4.462498  | 2.217692  | -1.976833 |
| H | -4.894244 | -2.277667 | 2.863581  | H | 3.741195  | 0.949463  | -0.836078 |
| H | -5.184371 | -0.966642 | 4.002190  | C | 4.270547  | 0.756833  | -4.287304 |
| H | -1.698072 | -0.261778 | 3.039286  | H | 3.403206  | 0.730402  | -4.962165 |
| H | -2.809127 | -0.834984 | 4.297370  | H | 4.705852  | 1.759609  | -4.335819 |
| H | -2.284251 | -1.925666 | 3.012521  | H | 5.005817  | 0.045101  | -4.688971 |
| H | -3.960579 | 1.151702  | 3.918812  | C | 1.357016  | -1.326914 | -1.156804 |
| H | -3.161396 | 1.699200  | 2.439838  | H | 1.089450  | -2.121479 | -0.456051 |
| H | -4.927708 | 1.502619  | 2.489128  | H | 0.809934  | -1.534295 | -2.085433 |
| C | -4.863190 | 0.529536  | -0.393885 | C | 0.917471  | -0.021442 | -0.619084 |
| C | -4.435373 | 2.017399  | -0.323109 | C | 0.796789  | 1.136987  | -0.221761 |
| C | -4.874951 | 0.168893  | -1.896937 | C | 0.839015  | 2.495571  | 0.239575  |
| C | -6.297108 | 0.386768  | 0.159953  | C | -0.030834 | 3.464572  | -0.299631 |
| H | -4.401066 | 2.415193  | 0.691380  | C | 1.775684  | 2.866719  | 1.225339  |
| H | -3.468142 | 2.160840  | -0.811715 | C | 0.048314  | 4.784413  | 0.144258  |
| H | -5.183231 | 2.605089  | -0.874690 | H | -0.760105 | 3.142753  | -1.040487 |
| H | -5.284428 | -0.823858 | -2.099693 | C | 1.846833  | 4.191782  | 1.655499  |
| H | -5.522995 | 0.892741  | -2.409640 | H | 2.439898  | 2.115163  | 1.642735  |
| H | -3.873523 | 0.264774  | -2.322805 | C | 0.984857  | 5.153387  | 1.116767  |
| H | -6.968272 | 0.971796  | -0.483720 | H | -0.625184 | 5.529452  | -0.271953 |
| H | -6.662298 | -0.643734 | 0.155981  | H | 2.574099  | 4.473498  | 2.412869  |
| H | -6.402687 | 0.786288  | 1.171983  | H | 1.041806  | 6.184930  | 1.455460  |
| H | -0.945266 | -0.752783 | 1.112774  | O | -1.819249 | 1.278338  | -1.838100 |
| S | 3.737868  | -2.438498 | -0.467583 | C | -1.282884 | 0.890089  | -3.062536 |
| O | 4.855953  | -2.898053 | -1.300714 | H | -1.720148 | -0.068975 | -3.422685 |
| O | 2.821411  | -3.389112 | 0.178686  | H | -0.186781 | 0.716354  | -3.007040 |
| C | 4.431278  | -1.424160 | 0.845124  | C | -1.534148 | 1.957484  | -4.137643 |

|     |           |           |           |   |           |           |           |
|-----|-----------|-----------|-----------|---|-----------|-----------|-----------|
| H   | -1.065440 | 2.907312  | -3.851545 | H | -4.565251 | 1.995817  | -3.611345 |
| H   | -1.121925 | 1.646638  | -5.108646 | H | -4.956931 | 0.338892  | -3.167854 |
| H   | -2.609908 | 2.135249  | -4.258466 | H | -5.601169 | 1.686773  | -2.215851 |
| H   | 4.051810  | -1.727584 | -3.079520 | C | -3.098942 | 2.791801  | -1.571126 |
| H   | 2.457867  | -1.105533 | -3.460200 | H | -3.912108 | 3.327192  | -1.075767 |
|     |           |           |           | H | -2.194851 | 2.880590  | -0.963376 |
|     |           |           |           | H | -2.902762 | 3.310883  | -2.518626 |
| TS9 |           |           |           | C | -5.855806 | 1.930595  | 0.538277  |
| C   | 0.236229  | 3.729047  | 0.804876  | H | -6.380325 | 2.398609  | 1.383045  |
| C   | 0.751472  | 5.024524  | 0.750913  | H | -5.643574 | 2.723402  | -0.183239 |
| C   | 2.108032  | 5.233070  | 0.483868  | H | -6.550752 | 1.226340  | 0.074985  |
| C   | 2.947985  | 4.134291  | 0.273243  | C | -4.980528 | 0.300958  | 2.223715  |
| C   | 2.440227  | 2.836670  | 0.328788  | H | -5.369429 | 0.911220  | 3.049938  |
| C   | 1.072751  | 2.619841  | 0.596229  | H | -5.771388 | -0.397196 | 1.941150  |
| H   | -0.815389 | 3.568692  | 1.021274  | H | -4.128753 | -0.269459 | 2.607408  |
| H   | 0.092092  | 5.871969  | 0.919675  | C | -3.661777 | 2.320457  | 1.704379  |
| H   | 2.507132  | 6.242889  | 0.438386  | H | -4.225556 | 2.838473  | 2.492265  |
| H   | 4.003135  | 4.285830  | 0.061477  | H | -2.778482 | 1.865475  | 2.163450  |
| H   | 3.094395  | 1.986592  | 0.159351  | H | -3.325494 | 3.076431  | 0.993428  |
| C   | 0.607062  | 1.247952  | 0.698283  | C | 1.734003  | -1.075480 | 1.348237  |
| C   | 0.824602  | 0.025782  | 0.936766  | N | 2.334382  | -1.747715 | 0.174580  |
| Pd  | -1.251597 | -0.040420 | 0.533323  | H | 2.538893  | -0.651553 | 1.956840  |
| H   | -1.024342 | 1.497156  | 0.156155  | H | 1.194617  | -1.796405 | 1.969432  |
| P   | -3.547021 | 0.255799  | -0.252286 | S | 3.927578  | -2.291363 | 0.414161  |
| C   | -3.444300 | 1.320433  | -1.891885 | C | 1.436102  | -2.637208 | -0.599575 |
| C   | -4.577576 | 1.246762  | 1.069690  | O | 4.179635  | -3.305802 | -0.615843 |
| C   | -4.494253 | -1.396963 | -0.673093 | O | 4.146563  | -2.595934 | 1.838345  |
| C   | -6.011287 | -1.249471 | -0.918873 | C | 4.938727  | -0.851973 | 0.035866  |
| H   | -6.265318 | -0.541552 | -1.710450 | C | 1.259205  | -2.263736 | -2.057135 |
| H   | -6.405362 | -2.230608 | -1.218491 | C | 5.164342  | -0.506103 | -1.300997 |
| H   | -6.548846 | -0.958158 | -0.012250 | C | 5.524593  | -0.125009 | 1.072157  |
| C   | -4.280733 | -2.412440 | 0.473703  | C | 1.665967  | -1.105273 | -2.589385 |
| H   | -3.213537 | -2.564605 | 0.661213  | C | 0.546076  | -3.322991 | -2.861901 |
| H   | -4.771095 | -2.122643 | 1.403400  | C | 5.976075  | 0.588246  | -1.590823 |
| H   | -4.725600 | -3.368317 | 0.162436  | H | 4.715627  | -1.092007 | -2.096821 |
| C   | -3.839825 | -2.037442 | -1.919169 | C | 6.334437  | 0.972344  | 0.762272  |
| H   | -4.052504 | -1.499811 | -2.845827 | H | 5.364451  | -0.427138 | 2.102151  |
| H   | -2.756003 | -2.134293 | -1.801211 | H | 1.494335  | -0.875665 | -3.638737 |
| H   | -4.247675 | -3.050142 | -2.035414 | H | 2.177256  | -0.356422 | -1.992830 |
| C   | -2.267905 | 0.783611  | -2.744623 | H | 0.368078  | -2.996219 | -3.891565 |
| H   | -2.155813 | 1.428146  | -3.627489 | H | 1.135204  | -4.250267 | -2.892755 |
| H   | -1.324999 | 0.804232  | -2.190583 | H | -0.421694 | -3.579139 | -2.408553 |
| H   | -2.420851 | -0.234585 | -3.102293 | C | 6.575660  | 1.344135  | -0.567227 |
| C   | -4.723617 | 1.323260  | -2.757059 | H | 6.155630  | 0.855965  | -2.629955 |

|        |           |           |           |   |           |           |           |
|--------|-----------|-----------|-----------|---|-----------|-----------|-----------|
| H      | 6.793632  | 1.537462  | 1.570230  | H | -0.410192 | 6.922883  | -1.694559 |
| C      | 7.482610  | 2.505834  | -0.901942 | H | -3.735600 | 5.218135  | 0.450020  |
| H      | 7.685488  | 3.123964  | -0.021239 | C | -5.673246 | -1.841521 | -1.864291 |
| H      | 8.448065  | 2.151073  | -1.286464 | H | -4.928134 | 0.164646  | -1.584307 |
| H      | 7.044077  | 3.147410  | -1.675482 | C | -5.653979 | -3.259754 | 0.083487  |
| O      | -1.271046 | -2.063704 | 1.094782  | H | -4.890806 | -2.360569 | 1.897769  |
| C      | -1.428193 | -2.288997 | 2.467097  | H | -0.291178 | 1.012075  | 4.243573  |
| H      | -2.430733 | -1.972524 | 2.823922  | H | -1.218792 | 1.620997  | 2.755127  |
| H      | -0.704521 | -1.704323 | 3.073586  | H | 0.179197  | -2.308121 | 3.065757  |
| C      | -1.246978 | -3.776560 | 2.793983  | H | 0.112387  | -1.350272 | 4.562736  |
| H      | -0.244262 | -4.117345 | 2.508109  | H | -1.296674 | -2.287570 | 4.030021  |
| H      | -1.381556 | -3.961135 | 3.868997  | H | -2.652728 | 7.187088  | -0.634286 |
| H      | -1.976996 | -4.382686 | 2.243893  | C | -5.949914 | -3.087320 | -1.275728 |
| H      | 1.792426  | -3.672115 | -0.539512 | H | -5.912661 | -1.679143 | -2.913182 |
| H      | 0.458425  | -2.613314 | -0.092896 | H | -5.877322 | -4.209239 | 0.564648  |
|        |           |           |           | C | -6.556792 | -4.204197 | -2.093012 |
|        |           |           |           | H | -7.475379 | -3.876589 | -2.595111 |
| Int 11 |           |           |           | H | -5.864357 | -4.543251 | -2.874440 |
| Pd     | 1.173229  | 0.104588  | -0.436971 | H | -6.804213 | -5.068757 | -1.468658 |
| P      | 3.583367  | -0.598363 | -0.019132 | H | 0.929610  | 2.567370  | -0.873263 |
| C      | -0.531323 | 1.138917  | -0.507273 | C | 4.750863  | 0.013652  | -1.449776 |
| C      | -1.920954 | 0.566030  | -0.449560 | C | 4.097543  | -0.393960 | -2.793508 |
| C      | -0.142842 | 2.418589  | -0.663273 | C | 4.797529  | 1.558550  | -1.464267 |
| N      | -2.380748 | 0.248898  | 0.932701  | C | 6.200713  | -0.512887 | -1.408717 |
| H      | -2.630380 | 1.283442  | -0.870433 | H | 4.052959  | -1.472500 | -2.945512 |
| H      | -1.934308 | -0.346867 | -1.057058 | H | 3.079777  | 0.001980  | -2.875984 |
| C      | -0.872832 | 3.702717  | -0.623902 | H | 4.691147  | 0.027997  | -3.616183 |
| S      | -4.051959 | 0.318988  | 1.185234  | H | 5.348448  | 1.981333  | -0.621335 |
| C      | -1.685773 | -0.859642 | 1.621269  | H | 5.312654  | 1.880440  | -2.379149 |
| C      | -0.264828 | 4.829308  | -1.215954 | H | 3.794898  | 1.999710  | -1.486311 |
| C      | -2.130893 | 3.871480  | -0.013680 | H | 6.766100  | -0.065581 | -2.238433 |
| O      | -4.509161 | 1.588487  | 0.601617  | H | 6.718108  | -0.249987 | -0.482356 |
| O      | -4.272626 | 0.007142  | 2.600856  | H | 6.257207  | -1.597040 | -1.532715 |
| C      | -4.810824 | -1.005136 | 0.226250  | H | 6.058246  | 1.139824  | 1.149211  |
| C      | -0.970812 | -0.475667 | 2.902709  | C | 5.555757  | 0.522093  | 1.898016  |
| C      | -0.898105 | 6.071679  | -1.225638 | C | 4.048895  | 0.352603  | 1.615982  |
| H      | 0.713076  | 4.721092  | -1.681582 | H | 6.082226  | -0.434127 | 1.958045  |
| C      | -2.763643 | 5.116086  | -0.025779 | H | 5.681999  | 1.026668  | 2.866219  |
| H      | -2.620584 | 3.043867  | 0.484320  | C | 3.384313  | 1.750110  | 1.544073  |
| C      | -5.109455 | -0.802270 | -1.126227 | C | 3.397565  | -0.346157 | 2.831825  |
| C      | -5.087968 | -2.229442 | 0.838834  | H | 2.294265  | 1.668942  | 1.436126  |
| C      | -0.811577 | 0.785876  | 3.315499  | H | 3.568333  | 2.280150  | 2.488512  |
| C      | -0.460700 | -1.662724 | 3.683730  | H | 3.765727  | 2.379604  | 0.739854  |
| C      | -2.156050 | 6.220102  | -0.631755 | H | 3.525303  | 0.302683  | 3.708776  |

|      |           |           |           |   |           |           |           |
|------|-----------|-----------|-----------|---|-----------|-----------|-----------|
| H    | 2.322379  | -0.493443 | 2.692179  | C | 1.247047  | -1.167753 | -1.472792 |
| H    | 3.858003  | -1.306045 | 3.074198  | C | 0.686041  | 5.218313  | -1.917329 |
| H    | 5.159730  | -2.491337 | 2.054805  | H | -0.537581 | 3.614946  | -2.658847 |
| C    | 5.151955  | -2.872781 | 1.031229  | C | 2.327243  | 4.606488  | -0.255153 |
| C    | 3.866507  | -2.501611 | 0.262408  | H | 2.421448  | 2.543456  | 0.292178  |
| H    | 5.217944  | -3.967839 | 1.097754  | C | 5.662539  | -1.967663 | 1.057052  |
| H    | 6.058551  | -2.521730 | 0.530071  | C | 5.643890  | 0.328138  | 0.253283  |
| C    | 2.627845  | -3.042121 | 1.019228  | C | 0.203707  | -2.088088 | -1.779558 |
| C    | 3.890881  | -3.248037 | -1.090619 | C | 1.966468  | -0.507180 | -2.636105 |
| H    | 2.536091  | -2.644256 | 2.030690  | C | 1.719491  | 5.584572  | -1.049002 |
| H    | 1.704201  | -2.822003 | 0.473811  | H | 0.213861  | 5.964311  | -2.551644 |
| H    | 2.723716  | -4.133471 | 1.107912  | H | 3.145887  | 4.874587  | 0.408020  |
| H    | 4.784806  | -3.038033 | -1.682658 | C | 6.896446  | -2.164801 | 0.429802  |
| H    | 3.889853  | -4.326497 | -0.883374 | H | 5.188121  | -2.762073 | 1.624226  |
| H    | 3.005415  | -3.034547 | -1.694562 | C | 6.871571  | 0.112132  | -0.366788 |
| H    | -2.396105 | -1.665845 | 1.850702  | H | 5.158059  | 1.297047  | 0.198773  |
| H    | -0.972994 | -1.292988 | 0.908733  | H | -0.101611 | -2.187599 | -2.820242 |
| O    | 0.190048  | -1.568208 | -1.071211 | H | 0.140302  | -3.005507 | -1.194322 |
| C    | 0.369811  | -1.938518 | -2.411077 | H | 2.604205  | -1.266536 | -3.112948 |
| H    | -0.055169 | -2.955292 | -2.503136 | H | 1.261630  | -0.150295 | -3.391667 |
| H    | 1.440228  | -2.028882 | -2.671800 | H | 2.597843  | 0.324367  | -2.314210 |
| C    | -0.307651 | -1.028548 | -3.441045 | H | 2.056313  | 6.616802  | -1.000830 |
| H    | 0.084879  | -0.005887 | -3.372936 | C | 7.517986  | -1.135327 | -0.289554 |
| H    | -0.127238 | -1.400185 | -4.459436 | H | 7.382039  | -3.134596 | 0.507324  |
| H    | -1.391298 | -0.987108 | -3.280686 | H | 7.341179  | 0.925836  | -0.915181 |
|      |           |           |           | C | 8.856270  | -1.345250 | -0.958392 |
|      |           |           |           | H | 9.624864  | -0.701040 | -0.512599 |
|      |           |           |           | H | 9.193509  | -2.382270 | -0.864504 |
| TS10 |           |           |           | H | 8.809547  | -1.100210 | -2.026626 |
| Pd   | -1.272152 | -0.945472 | -0.812399 | H | -0.193213 | 1.375455  | -2.252575 |
| P    | -3.234482 | 0.161728  | 0.551440  | C | -3.569777 | -0.950889 | 2.118706  |
| C    | 0.358885  | 0.431460  | -0.490582 | C | -3.394407 | -2.432586 | 1.711602  |
| C    | 1.103051  | 0.338822  | 0.823555  | C | -2.500097 | -0.677930 | 3.200281  |
| C    | 0.328069  | 1.522354  | -1.304136 | C | -4.958158 | -0.777461 | 2.773748  |
| N    | 2.408937  | -0.274493 | 0.479339  | H | -4.098960 | -2.757372 | 0.948056  |
| H    | 1.273314  | 1.297958  | 1.310332  | H | -2.389667 | -2.623684 | 1.324095  |
| H    | 0.549924  | -0.303392 | 1.524589  | H | -3.544340 | -3.054358 | 2.605720  |
| C    | 0.841278  | 2.893952  | -1.159751 | H | -2.635626 | 0.282627  | 3.703229  |
| S    | 3.481459  | -0.445402 | 1.796217  | H | -2.581405 | -1.456925 | 3.970173  |
| C    | 2.130905  | -1.508932 | -0.276131 | H | -1.482370 | -0.726159 | 2.799027  |
| C    | 0.262523  | 3.891902  | -1.975751 | H | -5.008779 | -1.426228 | 3.659853  |
| C    | 1.899657  | 3.279301  | -0.307105 | H | -5.146826 | 0.244384  | 3.109504  |
| O    | 3.177911  | -1.649986 | 2.587943  | H | -5.775182 | -1.074909 | 2.113784  |
| O    | 3.501651  | 0.873985  | 2.444557  | H | -3.905996 | 1.998421  | 3.194728  |
| C    | 5.044085  | -0.721525 | 0.958204  |   |           |           |           |

|      |           |           |           |   |           |           |           |
|------|-----------|-----------|-----------|---|-----------|-----------|-----------|
| C    | -4.040866 | 2.495136  | 2.229954  | H | -1.552331 | -0.553706 | 0.464829  |
| C    | -3.018305 | 2.005507  | 1.180432  | S | -4.009873 | -0.156772 | -1.273309 |
| H    | -5.080232 | 2.371057  | 1.924330  | C | -1.647737 | 0.803010  | -2.140658 |
| H    | -3.874855 | 3.568650  | 2.400430  | O | -4.495335 | -1.462259 | -0.812301 |
| C    | -1.611942 | 2.189538  | 1.794873  | O | -4.529204 | 0.471332  | -2.493287 |
| C    | -3.054745 | 2.958272  | -0.038182 | C | -0.373677 | 0.341344  | -2.849650 |
| H    | -0.837323 | 2.010475  | 1.053489  | C | -0.185744 | -1.072509 | -2.870364 |
| H    | -1.512793 | 3.232028  | 2.127519  | C | 0.082026  | 1.245890  | -3.967618 |
| H    | -1.420940 | 1.555519  | 2.659823  | H | 0.658676  | -1.470231 | -3.432262 |
| H    | -2.740694 | 3.957817  | 0.291454  | H | -1.062726 | -1.713311 | -2.906172 |
| H    | -2.357780 | 2.640540  | -0.818925 | H | 0.311747  | 2.251486  | -3.605395 |
| H    | -4.046253 | 3.061170  | -0.481430 | H | 0.968940  | 0.857577  | -4.470427 |
| H    | -5.732116 | 2.141019  | -0.142717 | H | -0.724980 | 1.310547  | -4.714430 |
| C    | -5.988870 | 1.080271  | -0.125814 | O | 2.270975  | 1.701385  | -2.045039 |
| C    | -4.841852 | 0.148644  | -0.575147 | C | 3.195395  | 1.363085  | -3.034917 |
| H    | -6.826578 | 0.944399  | -0.824117 | H | 2.809994  | 0.606492  | -3.749766 |
| H    | -6.360726 | 0.831656  | 0.872693  | H | 4.115080  | 0.907771  | -2.612005 |
| C    | -4.381652 | 0.538789  | -2.001697 | C | 3.614634  | 2.606313  | -3.832698 |
| C    | -5.439441 | -1.271950 | -0.695223 | H | 4.043613  | 3.361403  | -3.162486 |
| H    | -3.933157 | 1.533335  | -2.057624 | H | 4.365951  | 2.351999  | -4.594227 |
| H    | -3.666341 | -0.195051 | -2.384541 | H | 2.748860  | 3.057437  | -4.332401 |
| H    | -5.257749 | 0.537116  | -2.665841 | H | -2.336001 | 1.227824  | -2.878696 |
| H    | -5.917781 | -1.612125 | 0.226835  | H | -1.406539 | 1.598623  | -1.415160 |
| H    | -6.223487 | -1.238842 | -1.465440 | H | 1.315265  | -2.883504 | -1.186279 |
| H    | -4.677613 | -1.986184 | -1.009853 | C | -0.123645 | -3.952840 | -0.023068 |
| O    | -2.694078 | -2.345829 | -1.414072 | C | -1.152223 | -4.014114 | 0.943685  |
| C    | -2.391887 | -3.681746 | -1.667318 | C | 0.528226  | -5.165667 | -0.349235 |
| H    | -1.945436 | -4.185751 | -0.782784 | C | -1.528777 | -5.228496 | 1.519419  |
| H    | -1.658048 | -3.805378 | -2.489685 | H | -1.646647 | -3.111053 | 1.279905  |
| C    | -3.656517 | -4.455043 | -2.067310 | C | 0.151892  | -6.377514 | 0.224955  |
| H    | -4.117992 | -3.999970 | -2.952306 | H | 1.336593  | -5.146831 | -1.077200 |
| H    | -3.412210 | -5.500808 | -2.301654 | C | -0.886579 | -6.417322 | 1.161758  |
| H    | -4.396247 | -4.450010 | -1.257765 | H | -2.325909 | -5.242196 | 2.258576  |
| H    | 3.075272  | -1.931366 | -0.639113 | H | 0.668991  | -7.291236 | -0.057284 |
| H    | 1.635197  | -2.254838 | 0.360238  | H | -1.184230 | -7.359826 | 1.613545  |
|      |           |           |           | C | -4.247582 | 1.011100  | 0.075426  |
|      |           |           |           | C | -4.299620 | 2.382417  | -0.197851 |
|      |           |           |           | C | -4.362878 | 0.540467  | 1.386043  |
|      |           |           |           | C | -4.457737 | 3.281829  | 0.856014  |
|      |           |           |           | H | -4.241428 | 2.734983  | -1.222611 |
|      |           |           |           | C | -4.521719 | 1.456297  | 2.428488  |
|      |           |           |           | H | -4.354102 | -0.527084 | 1.581052  |
|      |           |           |           | C | -4.571969 | 2.836556  | 2.183502  |
|      |           |           |           | H | -4.503532 | 4.347460  | 0.642109  |
| TS11 |           |           |           |   |           |           |           |
| Pd   | 1.079737  | 0.144434  | -1.257084 |   |           |           |           |
| C    | -0.226015 | -1.521166 | -0.925057 |   |           |           |           |
| C    | -1.626755 | -1.123046 | -0.476236 |   |           |           |           |
| C    | 0.343897  | -2.741464 | -0.710044 |   |           |           |           |
| N    | -2.344333 | -0.324977 | -1.501023 |   |           |           |           |
| H    | -2.251623 | -1.999937 | -0.297503 |   |           |           |           |

|   |           |           |           |      |           |           |           |
|---|-----------|-----------|-----------|------|-----------|-----------|-----------|
| H | -4.618870 | 1.088999  | 3.447642  | H    | 3.912549  | 2.121325  | -0.741640 |
| C | -4.778499 | 3.821585  | 3.310472  |      |           |           |           |
| H | -4.561404 | 3.369456  | 4.283700  |      |           |           |           |
| H | -4.138010 | 4.703327  | 3.194041  | TS12 |           |           |           |
| H | -5.817553 | 4.176293  | 3.334996  | Pd   | -1.225831 | 0.657618  | 0.408687  |
| P | 2.250262  | 0.576871  | 1.116919  | P    | -3.563314 | -0.198964 | 0.012387  |
| C | 1.627187  | 2.325068  | 1.730848  | C    | 0.485262  | -0.004831 | 0.050116  |
| C | 1.520677  | 3.273320  | 0.513741  | C    | 1.360768  | -0.794778 | 0.961761  |
| C | 0.194467  | 2.200462  | 2.296470  | C    | 0.520322  | 0.595349  | -1.199291 |
| C | 2.504348  | 3.001937  | 2.806987  | N    | 2.159814  | -1.833890 | 0.266154  |
| H | 2.477199  | 3.484852  | 0.040475  | H    | 2.072406  | -0.087325 | 1.410315  |
| H | 0.871747  | 2.866387  | -0.266080 | H    | 0.784888  | -1.220987 | 1.793479  |
| H | 1.093444  | 4.225487  | 0.859878  | C    | 1.159629  | 1.874747  | -1.552952 |
| H | 0.158972  | 1.699926  | 3.266992  | S    | 3.553428  | -2.301449 | 1.149089  |
| H | -0.206472 | 3.212422  | 2.442564  | C    | 1.402926  | -2.967696 | -0.307206 |
| H | -0.479774 | 1.681954  | 1.606627  | C    | 1.286065  | 2.221542  | -2.912911 |
| H | 2.025842  | 3.946587  | 3.102864  | C    | 1.690373  | 2.756287  | -0.589662 |
| H | 2.617499  | 2.398212  | 3.710098  | O    | 4.061996  | -3.508892 | 0.486689  |
| H | 3.500513  | 3.253281  | 2.437433  | O    | 3.261924  | -2.319005 | 2.592989  |
| H | 1.655301  | 0.576768  | 4.341957  | C    | 4.686729  | -0.943972 | 0.846767  |
| C | 2.294069  | -0.237193 | 3.988700  | C    | 1.623625  | -3.210404 | -1.789689 |
| C | 1.918269  | -0.698667 | 2.564001  | C    | 1.930767  | 3.397581  | -3.298565 |
| H | 3.334022  | 0.079710  | 4.082814  | H    | 0.878581  | 1.555074  | -3.670437 |
| H | 2.144844  | -1.080951 | 4.677920  | C    | 2.338931  | 3.927186  | -0.975668 |
| C | 0.420069  | -1.076520 | 2.571956  | H    | 1.571660  | 2.525304  | 0.465114  |
| C | 2.670875  | -2.015488 | 2.258451  | C    | 5.292007  | -0.824186 | -0.409024 |
| H | 0.126592  | -1.503150 | 1.614890  | C    | 4.983120  | -0.051902 | 1.876853  |
| H | 0.257866  | -1.844263 | 3.340971  | C    | 2.265689  | -2.353065 | -2.590163 |
| H | -0.241501 | -0.242047 | 2.802791  | C    | 1.043018  | -4.513173 | -2.282295 |
| H | 2.320161  | -2.787011 | 2.956967  | C    | 2.462876  | 4.256253  | -2.331694 |
| H | 2.466259  | -2.377604 | 1.246545  | H    | 2.015627  | 3.644550  | -4.354070 |
| H | 3.751348  | -1.932756 | 2.389102  | H    | 2.739480  | 4.593845  | -0.215817 |
| H | 4.970592  | -0.345444 | 2.689542  | C    | 6.189912  | 0.216247  | -0.629656 |
| C | 5.045564  | 0.605619  | 2.157299  | H    | 5.067604  | -1.541075 | -1.192475 |
| C | 4.186207  | 0.662812  | 0.876069  | C    | 5.887333  | 0.986927  | 1.635656  |
| H | 6.098866  | 0.726588  | 1.866943  | H    | 4.524264  | -0.179848 | 2.852064  |
| H | 4.810189  | 1.411897  | 2.857499  | H    | 2.394975  | -2.562202 | -3.649578 |
| C | 4.577380  | -0.522563 | -0.040391 | H    | 2.685562  | -1.428852 | -2.206497 |
| C | 4.562379  | 1.958028  | 0.120715  | H    | -0.028227 | -4.590353 | -2.047583 |
| H | 4.428843  | -1.496757 | 0.428763  | H    | 1.161509  | -4.622033 | -3.364840 |
| H | 4.013689  | -0.504196 | -0.976951 | H    | 1.536084  | -5.366446 | -1.795944 |
| H | 5.644132  | -0.438918 | -0.289989 | H    | 2.960363  | 5.175795  | -2.629011 |
| H | 4.525967  | 2.839308  | 0.766817  | C    | 6.499557  | 1.140409  | 0.384942  |
| H | 5.600044  | 1.862741  | -0.227950 | H    | 6.663133  | 0.312641  | -1.604402 |

|   |           |           |           |
|---|-----------|-----------|-----------|
| H | 6.121236  | 1.683221  | 2.437485  |
| C | 7.472629  | 2.265698  | 0.122225  |
| H | 8.437592  | 1.881616  | -0.231022 |
| H | 7.091040  | 2.943499  | -0.651996 |
| H | 7.655442  | 2.856927  | 1.025114  |
| H | 0.203932  | 0.004840  | -2.062301 |
| C | -4.492882 | 0.984582  | -1.221602 |
| C | -4.178521 | 2.446035  | -0.819330 |
| C | -3.924358 | 0.807977  | -2.647813 |
| C | -6.023662 | 0.794176  | -1.284849 |
| H | -4.534657 | 2.710276  | 0.174987  |
| H | -3.103590 | 2.645094  | -0.841382 |
| H | -4.667637 | 3.112974  | -1.543147 |
| H | -4.221034 | -0.134951 | -3.113775 |
| H | -4.321501 | 1.615523  | -3.277298 |
| H | -2.832480 | 0.886370  | -2.666919 |
| H | -6.431201 | 1.479893  | -2.041183 |
| H | -6.314291 | -0.219004 | -1.574245 |
| H | -6.515400 | 1.032599  | -0.339283 |
| H | -5.094653 | -1.907082 | -2.278179 |
| C | -4.801501 | -2.491085 | -1.401787 |
| C | -3.486649 | -1.982119 | -0.772327 |
| H | -5.638146 | -2.495894 | -0.699802 |
| H | -4.652592 | -3.525634 | -1.742131 |
| C | -2.385702 | -2.008418 | -1.858991 |
| C | -3.031974 | -2.992160 | 0.306249  |
| H | -1.421336 | -1.689182 | -1.455562 |
| H | -2.277980 | -3.040034 | -2.221049 |
| H | -2.612470 | -1.385719 | -2.724250 |
| H | -2.827645 | -3.954475 | -0.182262 |
| H | -2.109293 | -2.671125 | 0.801260  |
| H | -3.788027 | -3.175692 | 1.071832  |
| H | -5.562286 | -2.266232 | 1.500900  |
| C | -5.805328 | -1.211850 | 1.654398  |
| C | -4.561460 | -0.298699 | 1.682296  |
| H | -6.308185 | -1.138896 | 2.628782  |
| H | -6.531018 | -0.912813 | 0.892438  |
| C | -3.580734 | -0.787621 | 2.777398  |
| C | -5.008515 | 1.115454  | 2.123010  |
| H | -3.187852 | -1.789997 | 2.598441  |
| H | -2.744194 | -0.090621 | 2.881199  |
| H | -4.118442 | -0.816044 | 3.735469  |
| H | -5.806048 | 1.524983  | 1.497796  |
| H | -5.413426 | 1.034176  | 3.141512  |

|   |           |           |           |
|---|-----------|-----------|-----------|
| H | -4.159086 | 1.803337  | 2.147048  |
| H | 1.621557  | -3.895124 | 0.237353  |
| H | 0.338085  | -2.762956 | -0.134170 |
| O | -2.027591 | 2.036847  | 1.722359  |
| C | -1.290850 | 3.187735  | 2.027228  |
| H | -1.991791 | 3.953584  | 2.412495  |
| H | -0.823903 | 3.626884  | 1.125274  |
| C | -0.207707 | 2.950874  | 3.087000  |
| H | 0.524585  | 2.213271  | 2.731870  |
| H | 0.326521  | 3.881857  | 3.325959  |
| H | -0.654145 | 2.560697  | 4.009670  |

Int 12

|   |           |           |           |
|---|-----------|-----------|-----------|
| C | 1.604917  | -1.778105 | 0.837141  |
| C | 2.546549  | -0.704041 | 0.338061  |
| C | 1.845843  | -3.101899 | 0.743555  |
| N | 2.593670  | 0.390296  | 1.322127  |
| H | 3.551735  | -1.110610 | 0.227377  |
| H | 2.216432  | -0.313934 | -0.643908 |
| S | 3.976616  | 1.369471  | 1.294525  |
| C | 1.288296  | 1.067879  | 1.463992  |
| O | 5.122212  | 0.456313  | 1.210484  |
| O | 3.820125  | 2.315357  | 2.404198  |
| C | 0.272325  | 0.095973  | 2.070944  |
| C | 0.342543  | -1.309454 | 1.543330  |
| H | -0.507395 | -1.442408 | 0.734951  |
| H | 0.048742  | -2.035120 | 2.307522  |
| H | 1.415157  | 1.927542  | 2.122327  |
| H | 0.953391  | 1.431655  | 0.479388  |
| H | 1.124312  | -3.763494 | 1.227020  |
| C | 2.972054  | -3.806693 | 0.103420  |
| C | 3.447747  | -4.995429 | 0.691985  |
| C | 3.569636  | -3.380131 | -1.097943 |
| C | 4.506552  | -5.706524 | 0.128196  |
| H | 2.987752  | -5.352093 | 1.611050  |
| C | 4.626418  | -4.094588 | -1.666675 |
| H | 3.185763  | -2.502577 | -1.609661 |
| C | 5.104535  | -5.255830 | -1.053532 |
| H | 4.864313  | -6.613291 | 0.609280  |
| H | 5.070398  | -3.747407 | -2.596347 |
| H | 5.927877  | -5.809799 | -1.496675 |
| C | 3.929939  | 2.316687  | -0.235988 |
| C | 3.235318  | 3.531107  | -0.278257 |

|    |           |           |           |        |           |           |           |
|----|-----------|-----------|-----------|--------|-----------|-----------|-----------|
| C  | 4.570289  | 1.821720  | -1.374631 | H      | -1.962337 | -3.125924 | -1.003126 |
| C  | 3.178753  | 4.242229  | -1.475944 | H      | -4.942364 | -3.561218 | 1.023162  |
| H  | 2.766909  | 3.920917  | 0.619683  | H      | -4.318411 | -2.065089 | 1.730542  |
| C  | 4.504243  | 2.549383  | -2.565532 | H      | -5.804610 | -2.047840 | 0.759465  |
| H  | 5.133498  | 0.895535  | -1.319331 | H      | -6.631006 | -0.751302 | -0.611126 |
| C  | 3.809139  | 3.765147  | -2.637675 | C      | -6.263551 | 0.199116  | -1.006970 |
| H  | 2.642809  | 5.188463  | -1.506469 | C      | -4.968805 | 0.679018  | -0.318015 |
| H  | 5.011336  | 2.168762  | -3.449244 | H      | -7.049143 | 0.945470  | -0.823169 |
| C  | 3.751978  | 4.559073  | -3.922160 | H      | -6.158285 | 0.100024  | -2.091002 |
| H  | 4.204200  | 4.009418  | -4.753926 | C      | -5.208488 | 0.790077  | 1.208696  |
| H  | 2.717253  | 4.797663  | -4.196976 | C      | -4.661510 | 2.116009  | -0.800913 |
| H  | 4.287248  | 5.512000  | -3.821116 | H      | -5.494435 | -0.153888 | 1.674862  |
| Pd | -1.502638 | 0.121238  | 0.972262  | H      | -4.317073 | 1.184709  | 1.704185  |
| O  | -2.198419 | 2.022386  | 1.276858  | H      | -6.034922 | 1.495618  | 1.374925  |
| C  | -1.773875 | 2.849739  | 2.320282  | H      | -4.606850 | 2.195810  | -1.889756 |
| H  | -0.679768 | 3.016579  | 2.304347  | H      | -5.487806 | 2.763727  | -0.476347 |
| H  | -2.011496 | 2.419287  | 3.312392  | H      | -3.741978 | 2.495812  | -0.347665 |
| C  | -2.466469 | 4.213711  | 2.206500  | C      | 0.139947  | 0.211520  | 3.579578  |
| H  | -3.555505 | 4.101112  | 2.266096  | H      | -0.167939 | 1.217533  | 3.878650  |
| H  | -2.142137 | 4.882148  | 3.016295  | H      | -0.594010 | -0.499885 | 3.975665  |
| H  | -2.224949 | 4.687498  | 1.247186  | H      | 1.107319  | 0.006031  | 4.065955  |
| P  | -3.400413 | -0.439127 | -0.591670 |        |           |           |           |
| C  | -2.730164 | -0.153524 | -2.398921 |        |           |           |           |
| C  | -1.910974 | 1.161349  | -2.391941 | Int 13 |           |           |           |
| C  | -1.727265 | -1.270493 | -2.767602 | Pd     | 1.108280  | -0.574651 | 1.094453  |
| C  | -3.794714 | -0.075972 | -3.513519 | P      | 2.753702  | -0.919931 | -0.881362 |
| H  | -2.513347 | 2.047099  | -2.193252 | C      | -0.819353 | 1.613213  | 1.100682  |
| H  | -1.116565 | 1.131730  | -1.638886 | C      | -1.718413 | 1.896709  | -0.082749 |
| H  | -1.444891 | 1.288106  | -3.379315 | C      | 0.301591  | 2.276539  | 1.480861  |
| H  | -2.202783 | -2.240166 | -2.932597 | N      | -2.789991 | 0.871572  | 0.033130  |
| H  | -1.230061 | -0.992881 | -3.706863 | H      | -2.170330 | 2.894331  | -0.045733 |
| H  | -0.945429 | -1.387731 | -2.009398 | H      | -1.172241 | 1.817580  | -1.031953 |
| H  | -3.286988 | 0.046260  | -4.480955 | C      | 0.943998  | 3.485442  | 0.941248  |
| H  | -4.406460 | -0.979478 | -3.578927 | S      | -3.543945 | 0.470865  | -1.427088 |
| H  | -4.463109 | 0.779765  | -3.393479 | C      | -2.303116 | -0.240399 | 0.879263  |
| H  | -4.129961 | -2.940037 | -2.534944 | C      | 0.504905  | 4.207384  | -0.188333 |
| C  | -4.738646 | -2.873610 | -1.629400 | C      | 2.069565  | 3.980790  | 1.634636  |
| C  | -3.951678 | -2.304767 | -0.428883 | O      | -2.819896 | -0.606397 | -2.126037 |
| H  | -5.632797 | -2.291403 | -1.863216 | O      | -3.773202 | 1.752657  | -2.110444 |
| H  | -5.065880 | -3.894948 | -1.388234 | C      | -5.108949 | -0.201395 | -0.866042 |
| C  | -2.698145 | -3.184030 | -0.200576 | C      | -1.437002 | 0.478378  | 1.936425  |
| C  | -4.808291 | -2.485278 | 0.845871  | C      | 1.163691  | 5.367776  | -0.598150 |
| H  | -2.202108 | -2.923020 | 0.739358  | H      | -0.352805 | 3.874861  | -0.759449 |
| H  | -3.015667 | -4.233069 | -0.123214 | C      | 2.728018  | 5.139013  | 1.225357  |



|   |           |           |           |        |           |           |           |
|---|-----------|-----------|-----------|--------|-----------|-----------|-----------|
| H | 2.426379  | 3.443084  | 2.510439  | C      | 1.500589  | 1.225394  | -2.228223 |
| C | -5.356649 | -1.567635 | -0.992545 | C      | 3.732411  | 1.735453  | -1.319439 |
| C | -6.075419 | 0.661954  | -0.338251 | H      | 1.048841  | 1.460941  | -1.260888 |
| C | -0.360030 | -0.434828 | 2.511657  | H      | 1.578030  | 2.164140  | -2.793350 |
| C | -2.338647 | 1.077254  | 3.046485  | H      | 0.821391  | 0.570224  | -2.772978 |
| C | 2.276944  | 5.840613  | 0.102888  | H      | 3.649557  | 2.664515  | -1.899011 |
| H | 0.801428  | 5.905286  | -1.470906 | H      | 3.345627  | 1.945861  | -0.317880 |
| H | 3.591111  | 5.494320  | 1.782618  | H      | 4.795749  | 1.499364  | -1.241327 |
| C | -6.589760 | -2.075492 | -0.572392 | H      | 5.852653  | -0.206616 | -1.545673 |
| H | -4.599115 | -2.216454 | -1.420138 | C      | 5.688117  | -1.230083 | -1.199649 |
| C | -7.297211 | 0.137938  | 0.075212  | C      | 4.523724  | -1.349880 | -0.194097 |
| H | -5.871821 | 1.725428  | -0.261799 | H      | 6.614051  | -1.553060 | -0.702555 |
| H | 0.078636  | -0.027922 | 3.431239  | H      | 5.551532  | -1.868340 | -2.076999 |
| H | -0.728470 | -1.446657 | 2.706775  | C      | 4.790090  | -0.412931 | 1.010368  |
| H | -2.804594 | 0.269533  | 3.625062  | C      | 4.527107  | -2.785587 | 0.378991  |
| H | -1.743686 | 1.689279  | 3.732826  | H      | 4.849712  | 0.641720  | 0.736959  |
| H | -3.134955 | 1.703426  | 2.625820  | H      | 4.013739  | -0.526171 | 1.773600  |
| H | 2.784573  | 6.745697  | -0.220138 | H      | 5.752637  | -0.688474 | 1.463856  |
| C | -7.574931 | -1.237111 | -0.034065 | H      | 4.513019  | -3.550720 | -0.401285 |
| H | -6.786035 | -3.140514 | -0.670395 | H      | 5.458495  | -2.925113 | 0.945848  |
| H | -8.051933 | 0.806025  | 0.484555  | H      | 3.683048  | -2.944380 | 1.055081  |
| C | -8.910925 | -1.784735 | 0.410986  | O      | 1.671539  | -2.336535 | 1.935765  |
| H | -9.728654 | -1.367136 | -0.190213 | C      | 1.926852  | -2.411530 | 3.312985  |
| H | -8.949226 | -2.874565 | 0.316730  | H      | 1.083604  | -2.040275 | 3.919798  |
| H | -9.116460 | -1.528823 | 1.457775  | H      | 2.811473  | -1.809070 | 3.599707  |
| H | 0.767659  | 1.921078  | 2.398669  | C      | 2.176925  | -3.877490 | 3.690389  |
| C | 2.122517  | -2.413668 | -1.963499 | H      | 3.036258  | -4.283092 | 3.143976  |
| C | 1.605268  | -3.521852 | -1.014157 | H      | 2.378855  | -3.966148 | 4.766904  |
| C | 0.898603  | -1.971667 | -2.798337 | H      | 1.299851  | -4.488623 | 3.447128  |
| C | 3.164854  | -3.028018 | -2.922411 | H      | -3.151518 | -0.771646 | 1.321574  |
| H | 2.389878  | -3.980104 | -0.413770 | H      | -1.694484 | -0.951926 | 0.304196  |
| H | 0.849609  | -3.145782 | -0.319949 |        |           |           |           |
| H | 1.150084  | -4.311719 | -1.628326 |        |           |           |           |
| H | 1.156838  | -1.295575 | -3.616846 | Int 14 |           |           |           |
| H | 0.453877  | -2.866310 | -3.254074 | Pd     | 1.054425  | 0.099252  | -0.522171 |
| H | 0.119070  | -1.504154 | -2.188354 | P      | 3.238772  | -1.097882 | 0.039108  |
| H | 2.678720  | -3.823089 | -3.505619 | C      | -0.661970 | 1.132049  | -0.497990 |
| H | 3.569998  | -2.304569 | -3.634342 | C      | -1.990938 | 0.392977  | -0.494602 |
| H | 4.001469  | -3.489032 | -2.391723 | C      | -0.610967 | 2.466008  | -0.308634 |
| H | 2.932848  | -0.250171 | -4.059068 | N      | -2.638449 | 0.312893  | 0.841113  |
| C | 3.544996  | 0.399708  | -3.428907 | H      | -2.676658 | 0.912110  | -1.170018 |
| C | 2.917822  | 0.635879  | -2.038970 | H      | -1.847609 | -0.619665 | -0.881065 |
| H | 4.549996  | -0.026337 | -3.374353 | C      | 0.563429  | 3.357816  | -0.368894 |
| H | 3.626058  | 1.365291  | -3.948494 | S      | -4.138451 | 1.044573  | 1.027543  |

|   |           |           |           |   |           |           |           |
|---|-----------|-----------|-----------|---|-----------|-----------|-----------|
| C | -2.341536 | -0.853959 | 1.683721  | H | 5.862559  | 1.166834  | -1.605484 |
| C | 0.586619  | 4.524890  | 0.420661  | H | 4.297105  | 1.545805  | -0.881463 |
| C | 1.656241  | 3.124556  | -1.228178 | H | 6.778033  | -1.079187 | -1.637546 |
| O | -4.056347 | 2.344372  | 0.346601  | H | 6.395596  | -1.516149 | 0.030642  |
| O | -4.480181 | 0.937726  | 2.450612  | H | 5.815722  | -2.517692 | -1.308862 |
| C | -5.350639 | 0.061068  | 0.125350  | H | 5.808800  | -0.181184 | 1.777534  |
| C | -1.512659 | -0.590069 | 2.928476  | C | 5.066740  | -0.741340 | 2.351231  |
| C | 1.669393  | 5.404372  | 0.379925  | C | 3.624627  | -0.514320 | 1.853261  |
| H | -0.256483 | 4.735808  | 1.074804  | H | 5.351444  | -1.797158 | 2.335131  |
| C | 2.738831  | 4.006810  | -1.272568 | H | 5.141177  | -0.398376 | 3.392880  |
| H | 1.627724  | 2.265882  | -1.896792 | C | 3.283934  | 0.995244  | 1.922529  |
| C | -5.601821 | 0.328576  | -1.225231 | C | 2.661140  | -1.202523 | 2.846862  |
| C | -6.025403 | -0.972399 | 0.780593  | H | 2.236164  | 1.183538  | 1.648345  |
| C | -1.033702 | 0.613374  | 3.256867  | H | 3.404616  | 1.341822  | 2.958039  |
| C | -1.297551 | -1.820060 | 3.777009  | H | 3.914706  | 1.621990  | 1.292827  |
| C | 2.754707  | 5.148844  | -0.465730 | H | 2.784274  | -0.725138 | 3.828459  |
| H | 1.662843  | 6.295337  | 1.003311  | H | 1.613113  | -1.079938 | 2.557648  |
| H | 3.561798  | 3.814966  | -1.957360 | H | 2.871523  | -2.265960 | 2.979270  |
| C | -6.518604 | -0.459754 | -1.919514 | H | 4.039399  | -3.600685 | 1.907999  |
| H | -5.105312 | 1.159897  | -1.714929 | C | 4.097100  | -3.809920 | 0.836713  |
| C | -6.940087 | -1.752540 | 0.069054  | C | 3.043748  | -3.030562 | 0.021958  |
| H | -5.857195 | -1.143179 | 1.838925  | H | 3.913110  | -4.886230 | 0.710826  |
| H | -0.454197 | 0.758715  | 4.165781  | H | 5.120872  | -3.613663 | 0.507177  |
| H | -1.224984 | 1.484596  | 2.639622  | C | 1.627407  | -3.371414 | 0.549858  |
| H | -0.813173 | -2.625337 | 3.205634  | C | 3.074087  | -3.539615 | -1.437424 |
| H | -0.676082 | -1.601289 | 4.651074  | H | 1.479226  | -3.101389 | 1.595998  |
| H | -2.256072 | -2.221943 | 4.136036  | H | 0.858262  | -2.884390 | -0.056875 |
| H | 3.592968  | 5.839639  | -0.507987 | H | 1.485633  | -4.458849 | 0.472992  |
| C | -7.199802 | -1.513660 | -1.287982 | H | 4.063294  | -3.472435 | -1.896611 |
| H | -6.715946 | -0.245725 | -2.967905 | H | 2.793930  | -4.601680 | -1.434507 |
| H | -7.468021 | -2.552619 | 0.583132  | H | 2.347725  | -3.012381 | -2.061614 |
| C | -8.207812 | -2.343119 | -2.049440 | H | -3.276059 | -1.342772 | 1.993091  |
| H | -9.114533 | -1.762252 | -2.264223 | H | -1.817675 | -1.584956 | 1.052681  |
| H | -7.803326 | -2.678866 | -3.011772 | O | 0.158417  | -1.323799 | -1.667494 |
| H | -8.508815 | -3.229284 | -1.481254 | C | 0.301681  | -1.230767 | -3.061175 |
| H | -1.547569 | 2.966043  | -0.040322 | H | -0.011559 | -2.216301 | -3.453888 |
| C | 4.735451  | -0.603473 | -1.102893 | H | 1.358522  | -1.105623 | -3.358278 |
| C | 4.232737  | -0.624708 | -2.567266 | C | -0.542484 | -0.148175 | -3.740267 |
| C | 5.148033  | 0.860551  | -0.829332 | H | -0.260820 | 0.850676  | -3.386416 |
| C | 5.993473  | -1.489085 | -0.985770 | H | -0.400535 | -0.180825 | -4.829471 |
| H | 3.938706  | -1.615739 | -2.913169 | H | -1.608396 | -0.294440 | -3.530068 |
| H | 3.377964  | 0.046160  | -2.701961 |   |           |           |           |
| H | 5.041801  | -0.274394 | -3.223051 |   |           |           |           |
| H | 5.646118  | 0.996664  | 0.132963  |   |           |           |           |

|    |           |           |           |   |           |           |           |
|----|-----------|-----------|-----------|---|-----------|-----------|-----------|
| Pd | -1.022649 | 0.103726  | -0.943051 | H | 9.045045  | 1.621815  | -0.967961 |
| P  | -2.936758 | -0.906378 | 0.571668  | H | 0.844260  | 1.766349  | 2.247070  |
| C  | 0.477562  | 0.653394  | 0.512199  | C | -2.914100 | -2.848449 | 0.371694  |
| C  | 1.292616  | -0.484326 | 1.108803  | C | -2.547230 | -3.181504 | -1.093249 |
| C  | 0.374534  | 1.793158  | 1.257690  | C | -1.793880 | -3.459975 | 1.242841  |
| N  | 2.593522  | -0.479102 | 0.395198  | C | -4.232421 | -3.568287 | 0.732680  |
| H  | 1.487003  | -0.344469 | 2.174828  | H | -3.279158 | -2.827885 | -1.816838 |
| H  | 0.779414  | -1.446603 | 0.973615  | H | -1.586479 | -2.745259 | -1.379837 |
| C  | -0.230844 | 3.092198  | 0.965660  | H | -2.472587 | -4.274189 | -1.187236 |
| S  | 3.667428  | -1.721306 | 0.856322  | H | -2.025332 | -3.445335 | 2.310616  |
| C  | 2.330109  | -0.379528 | -1.046950 | H | -1.671631 | -4.512737 | 0.955818  |
| C  | 0.104345  | 4.178461  | 1.805687  | H | -0.827791 | -2.970997 | 1.083525  |
| C  | -1.115371 | 3.340420  | -0.105602 | H | -4.079634 | -4.650453 | 0.614391  |
| O  | 3.437495  | -2.944538 | 0.068251  | H | -4.544140 | -3.396260 | 1.765293  |
| O  | 3.604208  | -1.767617 | 2.323487  | H | -5.058891 | -3.290341 | 0.076296  |
| C  | 5.249760  | -1.039686 | 0.353082  | H | -3.594117 | -2.395732 | 3.417737  |
| C  | 1.443495  | 0.837760  | -1.287297 | C | -3.900489 | -1.347790 | 3.358900  |
| C  | -0.392896 | 5.458768  | 1.569092  | C | -2.933452 | -0.510682 | 2.492047  |
| H  | 0.774710  | 4.009081  | 2.645801  | H | -4.936725 | -1.313629 | 3.021794  |
| C  | -1.606528 | 4.622885  | -0.347277 | H | -3.876329 | -0.951997 | 4.384445  |
| H  | -1.433662 | 2.510009  | -0.732028 | C | -1.515406 | -0.713309 | 3.072899  |
| C  | 5.926517  | -1.599106 | -0.730225 | C | -3.248065 | 0.990618  | 2.694111  |
| C  | 5.803413  | 0.019676  | 1.080783  | H | -0.799343 | -0.048250 | 2.596027  |
| C  | 0.454558  | 0.704746  | -2.310562 | H | -1.541715 | -0.459848 | 4.142054  |
| C  | 2.148658  | 2.175897  | -1.157829 | H | -1.147462 | -1.735480 | 2.994395  |
| C  | -1.248056 | 5.688728  | 0.485573  | H | -3.061964 | 1.246301  | 3.746398  |
| H  | -0.115840 | 6.276642  | 2.229406  | H | -2.601839 | 1.628825  | 2.083921  |
| H  | -2.287739 | 4.786631  | -1.178534 | H | -4.287282 | 1.247534  | 2.482137  |
| C  | 7.171738  | -1.078119 | -1.095603 | H | -5.795706 | 0.195034  | 1.724506  |
| H  | 5.488809  | -2.434636 | -1.267108 | C | -5.867121 | -0.390231 | 0.805391  |
| C  | 7.043794  | 0.525632  | 0.701780  | C | -4.644428 | -0.238695 | -0.125562 |
| H  | 5.271775  | 0.430854  | 1.933141  | H | -6.750944 | -0.025531 | 0.263383  |
| H  | 0.136528  | 1.613899  | -2.817777 | H | -6.062970 | -1.432309 | 1.073335  |
| H  | 0.460484  | -0.189564 | -2.933073 | C | -4.439743 | 1.259222  | -0.456094 |
| H  | 2.806691  | 2.288835  | -2.032046 | C | -5.001086 | -0.926339 | -1.463224 |
| H  | 1.443956  | 3.010068  | -1.165957 | H | -4.163632 | 1.866156  | 0.408083  |
| H  | 2.757512  | 2.230424  | -0.252260 | H | -3.670336 | 1.378712  | -1.223605 |
| H  | -1.643857 | 6.684200  | 0.301767  | H | -5.380687 | 1.663178  | -0.855458 |
| C  | 7.747985  | -0.012921 | -0.391045 | H | -5.338203 | -1.957727 | -1.333546 |
| H  | 7.702618  | -1.513943 | -1.938591 | H | -5.838406 | -0.372979 | -1.912204 |
| H  | 7.478566  | 1.347714  | 1.266303  | H | -4.153902 | -0.899496 | -2.151126 |
| C  | 9.098511  | 0.542558  | -0.778687 | O | -2.169510 | -0.467141 | -2.595750 |
| H  | 9.832096  | 0.391295  | 0.023472  | C | -2.342375 | 0.347598  | -3.714778 |
| H  | 9.486324  | 0.060666  | -1.681691 | H | -1.390157 | 0.759296  | -4.102724 |

|      |           |           |           |   |           |           |           |
|------|-----------|-----------|-----------|---|-----------|-----------|-----------|
| H    | -2.982402 | 1.230418  | -3.494533 | H | -2.979842 | -1.694315 | 0.286214  |
| C    | -2.990608 | -0.448392 | -4.857080 | C | -4.140846 | -4.057313 | -2.563913 |
| H    | -3.975232 | -0.830902 | -4.563481 | H | -2.123419 | -3.922746 | -3.297352 |
| H    | -3.118541 | 0.183012  | -5.748085 | C | -5.044664 | -3.669459 | -1.569341 |
| H    | -2.361422 | -1.306108 | -5.124670 | H | -5.308416 | -2.504934 | 0.230370  |
| H    | 3.279062  | -0.241015 | -1.579074 | H | -4.464184 | -4.709379 | -3.371515 |
| H    | 1.842380  | -1.286291 | -1.429319 | H | -6.074947 | -4.014357 | -1.598478 |
|      |           |           |           | C | 4.579854  | -0.763203 | -0.297961 |
|      |           |           |           | C | 5.133148  | -0.084589 | 0.793421  |
| TS14 |           |           |           | C | 4.655748  | -0.225497 | -1.585435 |
| Pd   | -0.852186 | -0.368361 | 0.947444  | C | 5.755766  | 1.145899  | 0.586132  |
| C    | -0.205304 | -1.765510 | -0.530693 | H | 5.096456  | -0.526979 | 1.783767  |
| C    | 1.282395  | -1.527120 | -0.800923 | C | 5.284385  | 1.007288  | -1.773585 |
| C    | -0.954986 | -2.362415 | -1.499079 | H | 4.250168  | -0.776261 | -2.428045 |
| N    | 2.129678  | -1.999774 | 0.318023  | C | 5.843123  | 1.711574  | -0.696726 |
| H    | 1.603238  | -2.064296 | -1.698227 | H | 6.190316  | 1.670559  | 1.434252  |
| H    | 1.454504  | -0.452036 | -0.964867 | H | 5.349677  | 1.422087  | -2.776908 |
| S    | 3.745988  | -2.336529 | -0.037549 | C | 6.552322  | 3.028584  | -0.910205 |
| C    | 1.838612  | -1.444062 | 1.651649  | H | 6.296383  | 3.469996  | -1.878886 |
| O    | 3.742392  | -3.047983 | -1.320733 | H | 6.296863  | 3.752425  | -0.127813 |
| O    | 4.311579  | -2.937937 | 1.175478  | H | 7.642082  | 2.895025  | -0.885244 |
| C    | 0.397426  | -1.745055 | 2.071605  | P | -1.434288 | 1.850936  | -0.496091 |
| C    | -0.277807 | -2.671852 | 1.217594  | C | -0.052492 | 3.160464  | -0.045694 |
| C    | 0.153404  | -1.678882 | 3.558206  | C | 0.304847  | 3.008327  | 1.451294  |
| H    | -1.258932 | -3.027665 | 1.521730  | C | 1.246389  | 2.852424  | -0.823845 |
| H    | 0.322566  | -3.430063 | 0.722766  | C | -0.421620 | 4.635670  | -0.317880 |
| H    | 0.342275  | -0.676667 | 3.952190  | H | -0.521500 | 3.229069  | 2.123609  |
| H    | -0.870995 | -1.955510 | 3.814018  | H | 0.635781  | 1.993699  | 1.688774  |
| H    | 0.827059  | -2.392982 | 4.057571  | H | 1.126410  | 3.702584  | 1.679176  |
| O    | -1.378023 | 0.698993  | 2.688466  | H | 1.177122  | 3.092145  | -1.887395 |
| C    | -2.476217 | 0.242562  | 3.419912  | H | 2.051235  | 3.472394  | -0.406850 |
| H    | -2.520948 | -0.863638 | 3.490923  | H | 1.557822  | 1.808514  | -0.717334 |
| H    | -3.440999 | 0.536929  | 2.956387  | H | 0.447865  | 5.262098  | -0.072161 |
| C    | -2.450269 | 0.811957  | 4.845645  | H | -0.675098 | 4.827987  | -1.362763 |
| H    | -2.449906 | 1.908548  | 4.818374  | H | -1.248622 | 4.983721  | 0.303660  |
| H    | -3.327594 | 0.479806  | 5.419145  | H | -0.503991 | 3.577223  | -3.118296 |
| H    | -1.544885 | 0.490865  | 5.374744  | C | -1.465305 | 3.066923  | -3.220744 |
| H    | 2.525499  | -1.920829 | 2.359010  | C | -1.502023 | 1.727520  | -2.452381 |
| H    | 2.022503  | -0.357135 | 1.687967  | H | -2.253284 | 3.760892  | -2.924528 |
| H    | -0.434522 | -2.638995 | -2.421457 | H | -1.600854 | 2.855900  | -4.291352 |
| C    | -2.360991 | -2.765780 | -1.487638 | C | -0.318895 | 0.869194  | -2.957416 |
| C    | -3.293244 | -2.373076 | -0.502852 | C | -2.778555 | 0.959045  | -2.867193 |
| C    | -2.820770 | -3.610147 | -2.522772 | H | -0.345932 | -0.130384 | -2.525670 |
| C    | -4.611674 | -2.824116 | -0.540957 | H | -0.410525 | 0.762231  | -4.047554 |

|        |           |           |           |    |           |           |           |
|--------|-----------|-----------|-----------|----|-----------|-----------|-----------|
| H      | 0.657507  | 1.310881  | -2.759788 | C  | 1.385450  | 6.993765  | -0.408704 |
| H      | -2.710841 | 0.728506  | -3.939235 | H  | 2.940766  | 5.526096  | -0.699234 |
| H      | -2.881167 | 0.008047  | -2.336697 | H  | -0.385438 | 8.209927  | -0.183305 |
| H      | -3.692518 | 1.538541  | -2.723876 | H  | 2.074637  | 7.828883  | -0.314511 |
| H      | -4.066394 | 3.307785  | -1.797456 | C  | -4.704217 | -1.032545 | -0.298999 |
| C      | -3.783983 | 3.663996  | -0.803962 | C  | -4.427179 | -2.301823 | 0.221710  |
| C      | -3.157269 | 2.567721  | 0.084572  | C  | -5.073548 | -0.876149 | -1.637217 |
| H      | -4.705628 | 4.011232  | -0.315852 | C  | -4.515170 | -3.414743 | -0.613250 |
| H      | -3.134387 | 4.535422  | -0.921454 | H  | -4.168851 | -2.414313 | 1.269668  |
| C      | -4.140000 | 1.375415  | 0.166005  | C  | -5.158009 | -2.003242 | -2.458353 |
| C      | -3.032594 | 3.137092  | 1.516420  | H  | -5.317003 | 0.109535  | -2.020753 |
| H      | -4.331825 | 0.901884  | -0.797793 | C  | -4.880415 | -3.285869 | -1.963933 |
| H      | -3.774594 | 0.610604  | 0.855203  | H  | -4.304776 | -4.401458 | -0.206200 |
| H      | -5.102448 | 1.739207  | 0.551831  | H  | -5.455214 | -1.882011 | -3.497521 |
| H      | -2.536344 | 4.110938  | 1.536209  | C  | -4.990057 | -4.506138 | -2.848496 |
| H      | -4.045934 | 3.289242  | 1.913373  | H  | -5.178064 | -4.230264 | -3.891101 |
| H      | -2.495595 | 2.449581  | 2.173865  | H  | -4.071505 | -5.104735 | -2.816997 |
|        |           |           |           | H  | -5.811257 | -5.157249 | -2.522058 |
|        |           |           |           | Pd | 1.000090  | -0.211701 | 0.873859  |
| Int 15 |           |           |           | O  | 0.928647  | -1.877089 | 2.061579  |
| C      | -1.341222 | 2.454677  | -0.339768 | C  | 0.307123  | -1.931586 | 3.312877  |
| C      | -2.514479 | 1.537366  | -0.600478 | H  | -0.774470 | -1.707179 | 3.254025  |
| C      | -1.393073 | 3.731033  | -0.773936 | H  | 0.742001  | -1.202682 | 4.023202  |
| N      | -2.951850 | 0.946598  | 0.676353  | C  | 0.469499  | -3.339779 | 3.899538  |
| H      | -3.342954 | 2.098727  | -1.033333 | H  | 1.529834  | -3.589105 | 4.023872  |
| H      | -2.227759 | 0.734499  | -1.306442 | H  | -0.020515 | -3.407946 | 4.880712  |
| S      | -4.557765 | 0.415657  | 0.760966  | H  | 0.019344  | -4.086375 | 3.234089  |
| C      | -1.915102 | 0.056339  | 1.241571  | P  | 2.954662  | -1.125097 | -0.461521 |
| O      | -5.369344 | 1.482473  | 0.161492  | C  | 2.198167  | -1.874019 | -2.094828 |
| O      | -4.762521 | -0.028452 | 2.143489  | C  | 0.915656  | -2.650168 | -1.703358 |
| C      | -0.646952 | 0.856335  | 1.563944  | C  | 1.728303  | -0.733205 | -3.025969 |
| C      | -0.232993 | 1.875021  | 0.518774  | C  | 3.120984  | -2.807840 | -2.905836 |
| H      | 0.517400  | 1.365528  | -0.206712 | H  | 1.109138  | -3.522464 | -1.079866 |
| H      | 0.346736  | 2.678600  | 0.978372  | H  | 0.212389  | -2.009748 | -1.160714 |
| H      | -2.307501 | -0.394525 | 2.153402  | H  | 0.423205  | -2.998459 | -2.622178 |
| H      | -1.697263 | -0.750809 | 0.523706  | H  | 2.552671  | -0.177440 | -3.478816 |
| H      | -2.324394 | 4.037189  | -1.252312 | H  | 1.148240  | -1.173647 | -3.848090 |
| C      | -0.404503 | 4.818530  | -0.646914 | H  | 1.070481  | -0.026072 | -2.509169 |
| C      | 0.986276  | 4.625356  | -0.739459 | H  | 2.591995  | -3.127300 | -3.815094 |
| C      | -0.877044 | 6.133754  | -0.463333 | H  | 4.046326  | -2.319439 | -3.222290 |
| C      | 1.870530  | 5.699993  | -0.618862 | H  | 3.385197  | -3.713620 | -2.355298 |
| H      | 1.379872  | 3.635063  | -0.941675 | H  | 4.594433  | -0.150640 | -3.087852 |
| C      | 0.004676  | 7.206831  | -0.335982 | C  | 5.142653  | -0.041277 | -2.148708 |
| H      | -1.949375 | 6.307562  | -0.407212 | C  | 4.216583  | 0.276958  | -0.955557 |

|        |           |           |           |   |            |           |           |
|--------|-----------|-----------|-----------|---|------------|-----------|-----------|
| H      | 5.734023  | -0.946724 | -1.993454 | O | -3.540778  | -2.006030 | -2.069648 |
| H      | 5.847480  | 0.791388  | -2.284196 | C | -5.321479  | -1.105253 | -0.292126 |
| C      | 3.416256  | 1.561815  | -1.273323 | C | -1.544513  | 1.339085  | 0.825975  |
| C      | 5.098488  | 0.641841  | 0.261109  | C | 1.699364   | 5.010063  | 0.138469  |
| H      | 2.854710  | 1.892785  | -0.393791 | H | 1.728121   | 3.034630  | 0.996123  |
| H      | 4.121482  | 2.362377  | -1.536349 | C | 0.607763   | 5.219445  | -2.002335 |
| H      | 2.720467  | 1.455399  | -2.106495 | H | -0.231267  | 3.410709  | -2.809532 |
| H      | 5.656960  | 1.557083  | 0.021245  | C | -5.970042  | -1.514069 | 0.872530  |
| H      | 4.499532  | 0.847175  | 1.154508  | C | -5.955538  | -0.266273 | -1.215145 |
| H      | 5.833528  | -0.127662 | 0.503808  | C | -0.442343  | 1.341867  | 1.883749  |
| H      | 6.031787  | -2.093555 | -0.110073 | C | -2.314930  | 2.660758  | 0.671483  |
| C      | 5.300780  | -2.905390 | -0.150131 | C | 1.303236   | 5.804674  | -0.939230 |
| C      | 3.940494  | -2.520485 | 0.468605  | H | 2.255254   | 5.447636  | 0.963995  |
| H      | 5.719976  | -3.739771 | 0.429582  | H | 0.299870   | 5.822210  | -2.853177 |
| H      | 5.219073  | -3.240288 | -1.187742 | C | -7.270352  | -1.063114 | 1.119388  |
| C      | 4.156087  | -2.055831 | 1.930820  | H | -5.466612  | -2.180892 | 1.565119  |
| C      | 3.062791  | -3.791022 | 0.554755  | C | -7.250251  | 0.172932  | -0.952047 |
| H      | 4.824029  | -1.198262 | 2.020875  | H | -5.442199  | 0.028021  | -2.125146 |
| H      | 3.196680  | -1.820718 | 2.399411  | H | -0.109136  | 2.339378  | 2.177496  |
| H      | 4.617405  | -2.883538 | 2.487988  | H | -0.632547  | 0.713985  | 2.756013  |
| H      | 2.954407  | -4.298749 | -0.407249 | H | -2.841585  | 2.890897  | 1.606731  |
| H      | 3.559459  | -4.498762 | 1.232891  | H | -1.642092  | 3.493302  | 0.449792  |
| H      | 2.079072  | -3.562840 | 0.973632  | H | -3.056775  | 2.591767  | -0.133669 |
| C      | -0.601908 | 1.380642  | 2.988617  | H | 1.541475   | 6.865030  | -0.956938 |
| H      | -0.692938 | 0.571997  | 3.718763  | C | -7.928552  | -0.216469 | 0.217629  |
| H      | 0.331304  | 1.919058  | 3.190167  | H | -7.779129  | -1.381405 | 2.026178  |
| H      | -1.437447 | 2.077158  | 3.165469  | H | -7.747455  | 0.823956  | -1.667930 |
|        |           |           |           | C | -9.337331  | 0.262633  | 0.479653  |
|        |           |           |           | H | -10.029609 | -0.109476 | -0.286368 |
| Int 16 |           |           |           | H | -9.702116  | -0.077862 | 1.453870  |
| Pd     | 1.061246  | 0.399662  | 0.813592  | H | -9.394305  | 1.358055  | 0.461694  |
| P      | 2.996758  | -1.115835 | -0.486318 | H | 0.677068   | 1.165167  | -1.921138 |
| C      | -0.740840 | 0.904005  | -0.414467 | C | 2.842771   | -2.995331 | 0.021094  |
| C      | -1.411054 | -0.306413 | -1.061229 | C | 2.403741   | -3.071079 | 1.502275  |
| C      | 0.322816  | 1.590767  | -0.985344 | C | 1.710019   | -3.664198 | -0.790169 |
| N      | -2.737626 | -0.299562 | -0.398377 | C | 4.120755   | -3.843370 | -0.160928 |
| H      | -1.537010 | -0.193660 | -2.140635 | H | 3.143956   | -2.674627 | 2.194751  |
| H      | -0.862619 | -1.239277 | -0.872171 | H | 1.476657   | -2.522460 | 1.684189  |
| C      | 0.679882  | 3.048012  | -0.884124 | H | 2.236537   | -4.127947 | 1.754039  |
| S      | -3.664727 | -1.700326 | -0.636962 | H | 1.984396   | -3.854258 | -1.830515 |
| C      | -2.522116 | 0.148331  | 0.993915  | H | 1.489602   | -4.638759 | -0.335323 |
| C      | 1.395161  | 3.644916  | 0.164002  | H | 0.781143   | -3.084510 | -0.769025 |
| C      | 0.308216  | 3.856573  | -1.976365 | H | 3.890374   | -4.883161 | 0.111931  |
| O      | -3.343135 | -2.732084 | 0.363797  | H | 4.487328   | -3.851677 | -1.190146 |

|      |           |           |           |      |           |           |             |
|------|-----------|-----------|-----------|------|-----------|-----------|-------------|
| H    | 4.936401  | -3.517805 | 0.488192  | H    | 0.540586  | -2.889955 | -1.780444   |
| H    | 3.660490  | -3.089027 | -3.011857 | H    | 0.701299  | -1.203808 | -2.278217   |
| C    | 3.995722  | -2.057186 | -3.144337 | C    | -2.949077 | -0.238891 | -0.725800   |
| C    | 3.060046  | -1.046181 | -2.445149 | S    | 2.847033  | -0.507667 | -0.753570   |
| H    | 5.032428  | -1.989517 | -2.810894 | C    | 1.543343  | -2.268389 | 0.788356    |
| H    | 3.984936  | -1.855299 | -4.225357 | C    | -3.853643 | -1.115176 | -0.095191   |
| C    | 1.639615  | -1.277765 | -3.017483 | C    | -3.365416 | 1.090096  | -0.943651   |
| C    | 3.477148  | 0.379322  | -2.879257 | O    | 2.985275  | -0.369618 | -2.207242   |
| H    | 0.891548  | -0.639663 | -2.547142 | O    | 3.981635  | -0.859061 | 0.106230    |
| H    | 1.649368  | -1.039886 | -4.090094 | C    | 2.144149  | 1.024342  | -0.130570   |
| H    | 1.299377  | -2.308188 | -2.921844 | C    | 0.350435  | -2.634746 | 1.289265    |
| H    | 3.330037  | 0.474133  | -3.963806 | C    | -5.108067 | -0.670091 | 0.328733    |
| H    | 2.877763  | 1.157319  | -2.396822 | H    | -3.591686 | -2.160127 | 0.034644    |
| H    | 4.529312  | 0.592196  | -2.680733 | C    | -4.615310 | 1.537476  | -0.516005   |
| H    | 5.975237  | -0.405928 | -1.650671 | H    | -2.690663 | 1.778386  | -1.448143   |
| C    | 5.961933  | -0.832391 | -0.644603 | C    | 1.600031  | 1.947584  | -1.024955   |
| C    | 4.710929  | -0.439111 | 0.168735  | C    | 2.137907  | 1.271128  | 1.247039    |
| H    | 6.848298  | -0.444683 | -0.122630 | C    | 0.243197  | -3.338904 | 2.616304    |
| H    | 6.084497  | -1.915784 | -0.728497 | C    | -5.492682 | 0.658652  | 0.128153    |
| C    | 4.602225  | 1.104601  | 0.216280  | H    | -5.791102 | -1.368058 | 0.806737    |
| C    | 4.935549  | -0.891028 | 1.630072  | H    | -4.907481 | 2.570194  | -0.689873   |
| H    | 4.430687  | 1.564599  | -0.758548 | C    | 1.040249  | 3.127530  | -0.528917   |
| H    | 3.796442  | 1.416041  | 0.887681  | H    | 1.637799  | 1.753592  | -2.091963   |
| H    | 5.543935  | 1.511899  | 0.610302  | C    | 1.569045  | 2.450607  | 1.723127    |
| H    | 5.196644  | -1.949215 | 1.710075  | H    | 2.590303  | 0.560789  | 1.931236    |
| H    | 5.784667  | -0.321683 | 2.034213  | H    | 1.223591  | -3.465873 | 3.087829    |
| H    | 4.055197  | -0.688336 | 2.244123  | H    | -0.399725 | -2.780349 | 3.311471    |
| O    | 1.964143  | -0.191386 | 2.533790  | H    | -0.205752 | -4.336808 | 2.504173    |
| C    | 2.086065  | 0.645417  | 3.651575  | H    | -6.469719 | 1.002387  | 0.457677    |
| H    | 1.156839  | 1.197038  | 3.877108  | C    | 1.008571  | 3.395810  | 0.846756    |
| H    | 2.869412  | 1.415634  | 3.493534  | H    | 0.629648  | 3.854188  | -1.226336   |
| C    | 2.454103  | -0.185152 | 4.887196  | H    | 1.568729  | 2.645933  | 2.793362    |
| H    | 3.400328  | -0.717689 | 4.734474  | C    | 0.393005  | 4.667432  | 1.382494    |
| H    | 2.560725  | 0.459703  | 5.770924  | H    | 0.114252  | 5.349874  | 0.573168    |
| H    | 1.675770  | -0.930476 | 5.090391  | H    | -0.512160 | 4.452394  | 1.965175    |
| H    | -3.472433 | 0.447188  | 1.445397  | H    | 1.087002  | 5.196828  | 2.046598    |
| H    | -2.073044 | -0.650244 | 1.600221  | H    | -1.283811 | -0.103919 | -2.096454   |
|      |           |           |           | C    | -0.949992 | -2.366972 | 0.557069    |
|      |           |           |           | H    | -1.434644 | -3.333078 | 0.327272    |
| 6a-E |           |           |           | H    | -1.639075 | -1.850972 | 1.238218    |
| C    | -0.761877 | -1.558983 | -0.706654 | H    | 2.472534  | -2.419316 | 1.327657    |
| C    | 0.541622  | -1.851694 | -1.415667 |      |           |           |             |
| C    | -1.617292 | -0.647692 | -1.211225 | 6a-Z |           |           |             |
| N    | 1.703298  | -1.739273 | -0.511504 | C    | 0.095216  | -2.023159 | -0.86524200 |

|   |           |           |             |    |           |           |           |
|---|-----------|-----------|-------------|----|-----------|-----------|-----------|
| C | -0.299899 | -2.012573 | 0.59479600  |    |           |           |           |
| C | 1.294405  | -1.650856 | -1.35451600 | 4a |           |           |           |
| N | -1.583769 | -1.307987 | 0.80043600  | C  | 1.267793  | -1.066291 | -0.419811 |
| H | -0.446180 | -3.041342 | 0.95727200  | C  | 0.385791  | 0.079624  | 0.048599  |
| H | 0.446735  | -1.545488 | 1.23356700  | C  | 2.619361  | -1.164951 | -0.393497 |
| C | 2.515415  | -1.233129 | -0.63590900 | H  | 0.489355  | 0.270020  | 1.120824  |
| S | -1.623795 | 0.094537  | 1.75992600  | H  | 0.626863  | 1.011187  | -0.475704 |
| C | -2.600757 | -1.492179 | -0.16079000 | C  | 3.647292  | -0.233757 | 0.080153  |
| C | 3.327164  | -0.232372 | -1.20681400 | C  | -0.903636 | -1.732628 | -0.891756 |
| C | 2.945912  | -1.820125 | 0.56933700  | C  | 4.997998  | -0.597433 | -0.119518 |
| O | -0.630363 | -0.118287 | 2.81736600  | C  | 3.398648  | 0.998390  | 0.723669  |
| O | -3.041644 | 0.320443  | 2.05893900  | C  | 0.387921  | -2.110997 | -0.963771 |
| C | -1.060355 | 1.467807  | 0.74830800  | C  | 6.046603  | 0.222499  | 0.291711  |
| C | -2.392525 | -2.091172 | -1.34583400 | H  | 5.219787  | -1.543282 | -0.609469 |
| C | 4.497867  | 0.194783  | -0.58000500 | C  | 4.448999  | 1.818596  | 1.137278  |
| H | 3.025004  | 0.218887  | -2.14955500 | H  | 2.383772  | 1.321443  | 0.916853  |
| C | 4.117927  | -1.393489 | 1.19885600  | C  | 0.882851  | -3.406812 | -1.537327 |
| H | 2.381372  | -2.640690 | 1.00193400  | C  | 5.777682  | 1.440310  | 0.923980  |
| C | 0.286123  | 1.837573  | 0.77294600  | H  | 7.073944  | -0.089346 | 0.119915  |
| C | -1.974433 | 2.138629  | -0.07128400 | H  | 4.225241  | 2.759942  | 1.633476  |
| C | -3.530843 | -2.404162 | -2.28014100 | H  | 6.591402  | 2.083659  | 1.248456  |
| C | 4.895643  | -0.379986 | 0.63210800  | H  | 3.034286  | -2.085816 | -0.801591 |
| H | 5.102928  | 0.972893  | -1.03915200 | H  | -1.753256 | -2.304785 | -1.247039 |
| H | 4.428687  | -1.863950 | 2.12827200  | H  | 1.553832  | -3.232509 | -2.388345 |
| C | 0.715646  | 2.892049  | -0.03510300 | H  | 1.447635  | -3.981865 | -0.792146 |
| H | 0.982285  | 1.319923  | 1.42445300  | C  | -1.078585 | -0.371581 | -0.251248 |
| C | -1.525559 | 3.187375  | -0.87257400 | C  | -1.905627 | -0.512943 | 1.043138  |
| H | -3.021924 | 1.855847  | -0.06359000 | C  | -1.788210 | 0.611801  | -1.194885 |
| H | -4.489035 | -2.052264 | -1.88281400 | O  | -1.478947 | -0.393392 | 2.171258  |
| H | -3.377729 | -1.936767 | -3.26347300 | O  | -2.060377 | 0.395580  | -2.355638 |
| H | -3.618723 | -3.486514 | -2.45596700 | O  | -3.180436 | -0.838425 | 0.751911  |
| H | 5.809151  | -0.051772 | 1.12107200  | O  | -2.039608 | 1.778952  | -0.565580 |
| C | -0.177355 | 3.582451  | -0.86753200 | C  | -4.074287 | -1.042919 | 1.877485  |
| H | 1.763156  | 3.182934  | -0.01176800 | H  | -3.663254 | -1.841469 | 2.503119  |
| H | -2.236410 | 3.713489  | -1.50618300 | H  | -4.095075 | -0.123897 | 2.471669  |
| C | 0.286980  | 4.744360  | -1.71482500 | C  | -5.439751 | -1.397078 | 1.319680  |
| H | 1.374740  | 4.739879  | -1.84020800 | H  | -6.142493 | -1.558418 | 2.145495  |
| H | -0.170829 | 4.722595  | -2.71054600 | H  | -5.829337 | -0.591005 | 0.688809  |
| H | 0.011990  | 5.701786  | -1.25221000 | H  | -5.395711 | -2.313499 | 0.721583  |
| H | 1.394153  | -1.637600 | -2.44163700 | C  | -2.688252 | 2.814319  | -1.349132 |
| C | -1.006384 | -2.511393 | -1.78241600 | H  | -3.644618 | 2.423624  | -1.711060 |
| H | -0.972092 | -3.615022 | -1.83568000 | H  | -2.061560 | 3.032974  | -2.219575 |
| H | -0.821417 | -2.166339 | -2.80908700 | C  | -2.865232 | 4.024973  | -0.452268 |
| H | -3.583815 | -1.166995 | 0.16278600  | H  | -1.898579 | 4.394707  | -0.093927 |



|      |           |           |           |    |           |           |           |
|------|-----------|-----------|-----------|----|-----------|-----------|-----------|
| H    | -3.354659 | 4.829246  | -1.013951 | H  | 5.781567  | -2.743339 | 1.922236  |
| H    | -3.486805 | 3.784510  | 0.416858  | H  | 4.164724  | -3.198483 | 2.483556  |
| H    | 0.050016  | -4.025875 | -1.884740 | C  | 5.188069  | -1.782611 | 3.788104  |
|      |           |           |           | H  | 4.276770  | -1.413473 | 4.270894  |
| TS15 |           |           |           | H  | 5.630452  | -2.552552 | 4.431283  |
| C    | 1.132906  | 0.471932  | -0.778240 | H  | 5.897388  | -0.951689 | 3.707682  |
| C    | 2.134330  | 0.179397  | 0.343041  | H  | 1.426746  | -0.885849 | -4.029197 |
| C    | 0.373236  | 1.672192  | -0.878559 | H  | -1.266075 | 1.443203  | -0.591291 |
| H    | 2.421405  | 1.079045  | 0.889180  | Pd | -1.029503 | -0.101251 | -0.376583 |
| H    | 1.731696  | -0.539432 | 1.061190  | P  | -3.432637 | -0.247335 | -0.008663 |
| C    | 0.506489  | 2.827342  | 0.060672  | C  | -4.150570 | -1.949434 | -0.636888 |
| C    | 2.821282  | -0.795842 | -1.755269 | C  | -3.456508 | -2.276208 | -1.982968 |
| C    | 0.759480  | 4.098045  | -0.480469 | C  | -3.748470 | -3.086537 | 0.331453  |
| C    | 0.404746  | 2.703397  | 1.455930  | C  | -5.682878 | -2.000148 | -0.817108 |
| C    | 1.607499  | -0.258296 | -1.981456 | H  | -3.659614 | -1.545229 | -2.767973 |
| C    | 0.928538  | 5.210336  | 0.347571  | H  | -2.376042 | -2.364744 | -1.837909 |
| H    | 0.839074  | 4.214265  | -1.559243 | H  | -3.834350 | -3.246170 | -2.336345 |
| C    | 0.573377  | 3.813491  | 2.284873  | H  | -4.280318 | -3.044162 | 1.285555  |
| H    | 0.175857  | 1.733937  | 1.889960  | H  | -4.023375 | -4.038965 | -0.143342 |
| C    | 0.840451  | -0.361462 | -3.267839 | H  | -2.667919 | -3.087727 | 0.493170  |
| C    | 0.837696  | 5.072247  | 1.734933  | H  | -5.954596 | -3.023533 | -1.110762 |
| H    | 1.131573  | 6.183097  | -0.093150 | H  | -6.225780 | -1.775295 | 0.105779  |
| H    | 0.491786  | 3.695744  | 3.362644  | H  | -6.050930 | -1.337215 | -1.603845 |
| H    | 0.966757  | 5.936272  | 2.381555  | H  | -5.316778 | -1.601661 | 2.221718  |
| H    | 0.147419  | 1.984373  | -1.897159 | C  | -5.128235 | -0.540740 | 2.398077  |
| H    | 3.400825  | -1.377145 | -2.463517 | C  | -3.734518 | -0.093084 | 1.906205  |
| H    | -0.098924 | -0.905664 | -3.115339 | H  | -5.942058 | 0.030154  | 1.944193  |
| H    | 0.583128  | 0.628895  | -3.667694 | H  | -5.183744 | -0.380184 | 3.484024  |
| C    | 3.364272  | -0.447095 | -0.382847 | C  | -2.650878 | -0.933929 | 2.624396  |
| C    | 4.481262  | 0.604683  | -0.573882 | C  | -3.514731 | 1.368403  | 2.357157  |
| C    | 3.951415  | -1.658029 | 0.350965  | H  | -1.644643 | -0.609445 | 2.341388  |
| O    | 4.359572  | 1.796968  | -0.389571 | H  | -2.767911 | -0.796690 | 3.708612  |
| O    | 4.091173  | -2.766793 | -0.116914 | H  | -2.717707 | -1.999914 | 2.411024  |
| O    | 5.608509  | 0.027349  | -1.033876 | H  | -3.496290 | 1.390177  | 3.455230  |
| O    | 4.303720  | -1.321468 | 1.610781  | H  | -2.559581 | 1.770850  | 2.005383  |
| C    | 6.722792  | 0.910103  | -1.322163 | H  | -4.317685 | 2.037983  | 2.038612  |
| H    | 6.400241  | 1.638260  | -2.073430 | H  | -5.901344 | 1.777872  | 0.609677  |
| H    | 6.976089  | 1.457084  | -0.408404 | C  | -5.869229 | 1.377585  | -0.407335 |
| C    | 7.872207  | 0.050173  | -1.814011 | C  | -4.419675 | 1.184011  | -0.909331 |
| H    | 8.734736  | 0.686681  | -2.044400 | H  | -6.370247 | 2.110727  | -1.054708 |
| H    | 8.174133  | -0.676883 | -1.052566 | H  | -6.462731 | 0.462637  | -0.432237 |
| H    | 7.594764  | -0.496549 | -2.721544 | C  | -3.692700 | 2.543061  | -0.763400 |
| C    | 4.881537  | -2.373496 | 2.424238  | C  | -4.449101 | 0.903451  | -2.429848 |
|      |           |           |           | H  | -3.506945 | 2.843073  | 0.267269  |

|        |           |           |           |    |           |           |           |
|--------|-----------|-----------|-----------|----|-----------|-----------|-----------|
| H      | -2.736581 | 2.545650  | -1.292425 | O  | -4.352518 | 2.167263  | -0.675755 |
| H      | -4.323060 | 3.316720  | -1.223072 | O  | -1.602952 | 3.410693  | 0.140274  |
| H      | -5.087430 | 0.061905  | -2.704029 | C  | -5.688283 | 2.513537  | -0.225264 |
| H      | -4.848398 | 1.791945  | -2.937748 | H  | -6.204630 | 1.591242  | 0.058523  |
| H      | -3.444435 | 0.722072  | -2.826402 | H  | -5.599375 | 3.141668  | 0.666901  |
| O      | -0.823243 | -2.171586 | -0.138366 | C  | -6.384192 | 3.231157  | -1.366645 |
| C      | 0.342285  | -2.785970 | 0.312515  | H  | -7.400093 | 3.507306  | -1.060687 |
| H      | 0.611032  | -2.464095 | 1.344576  | H  | -5.848104 | 4.145163  | -1.644154 |
| H      | 1.213076  | -2.551726 | -0.323851 | H  | -6.453860 | 2.588954  | -2.251013 |
| C      | 0.176880  | -4.312282 | 0.328831  | C  | -1.101946 | 4.742089  | -0.147103 |
| H      | -0.066212 | -4.677877 | -0.676491 | H  | -1.663767 | 5.141968  | -0.997462 |
| H      | 1.103977  | -4.800971 | 0.659637  | H  | -0.051903 | 4.663956  | -0.442823 |
| H      | -0.634184 | -4.612304 | 1.004292  | C  | -1.283451 | 5.580275  | 1.104767  |
|        |           |           |           | H  | -0.723349 | 5.159030  | 1.946489  |
|        |           |           |           | H  | -0.916751 | 6.597149  | 0.921809  |
|        |           |           |           | H  | -2.339267 | 5.641083  | 1.389462  |
|        |           |           |           | H  | -2.363299 | -1.918168 | -3.239840 |
|        |           |           |           | H  | -0.700417 | -3.053887 | 0.437738  |
| Int 17 |           |           |           | Pd | 0.808507  | -0.681186 | -0.211218 |
| C      | -1.255476 | -1.051648 | -0.021588 | P  | 3.121550  | 0.206992  | 0.298887  |
| C      | -1.324650 | 0.355195  | 0.541491  | C  | 4.611246  | -0.915859 | -0.268183 |
| C      | -1.350399 | -2.286777 | 0.876045  | C  | 4.215204  | -2.391706 | -0.005534 |
| H      | -1.664264 | 0.426186  | 1.577101  | C  | 4.810503  | -0.770946 | -1.794421 |
| H      | -0.277403 | 0.820636  | 0.569910  | C  | 5.970306  | -0.634245 | 0.407839  |
| C      | -2.737638 | -2.885416 | 1.095938  | H  | 4.267288  | -2.655879 | 1.052132  |
| C      | -2.406493 | 0.231600  | -1.602448 | H  | 3.205753  | -2.624078 | -0.361256 |
| C      | -2.976982 | -4.226850 | 0.760315  | H  | 4.930353  | -3.040393 | -0.530702 |
| C      | -3.785116 | -2.148122 | 1.670381  | H  | 5.239454  | 0.192620  | -2.079317 |
| C      | -1.943781 | -1.008815 | -1.333111 | H  | 5.515423  | -1.545993 | -2.123198 |
| C      | -4.223832 | -4.818346 | 0.986939  | H  | 3.882705  | -0.920232 | -2.351604 |
| H      | -2.175029 | -4.814558 | 0.318100  | H  | 6.722316  | -1.301645 | -0.036518 |
| C      | -5.033910 | -2.734525 | 1.895764  | H  | 6.318515  | 0.391787  | 0.260943  |
| H      | -3.635357 | -1.106637 | 1.939570  | H  | 5.959179  | -0.842143 | 1.480462  |
| C      | -2.122406 | -2.211760 | -2.212473 | H  | 5.473404  | 1.955247  | -1.093814 |
| C      | -5.259730 | -4.072144 | 1.555396  | C  | 4.784537  | 2.545286  | -0.485488 |
| H      | -4.383434 | -5.860359 | 0.719301  | C  | 3.350175  | 1.975304  | -0.486868 |
| H      | -5.830124 | -2.143213 | 2.342214  | H  | 5.204835  | 2.628818  | 0.520402  |
| H      | -6.230833 | -4.527686 | 1.733454  | H  | 4.763919  | 3.556262  | -0.916859 |
| H      | -0.916711 | -2.035730 | 1.853626  | C  | 2.830644  | 1.904290  | -1.944731 |
| H      | -2.892215 | 0.548036  | -2.518332 | C  | 2.439820  | 2.992180  | 0.235863  |
| H      | -1.222116 | -2.829742 | -2.214936 | H  | 1.793150  | 1.556640  | -1.986197 |
| H      | -2.944264 | -2.834411 | -1.836950 | H  | 2.860787  | 2.912657  | -2.380154 |
| C      | -2.204602 | 1.185160  | -0.444036 | H  | 3.429743  | 1.255564  | -2.584315 |
| C      | -3.569977 | 1.510403  | 0.199689  | H  | 2.446553  | 3.928081  | -0.338851 |
| C      | -1.555792 | 2.511711  | -0.867275 |    |           |           |           |
| O      | -3.916319 | 1.209133  | 1.322934  |    |           |           |           |
| O      | -1.056509 | 2.734330  | -1.948320 |    |           |           |           |

|      |           |           |           |    |           |           |           |
|------|-----------|-----------|-----------|----|-----------|-----------|-----------|
| H    | 1.401787  | 2.649770  | 0.287066  | H  | 6.394360  | -4.483205 | -1.811908 |
| H    | 2.779971  | 3.231939  | 1.246023  | H  | 1.043138  | -2.087842 | -1.740648 |
| H    | 4.163094  | 2.354607  | 2.510438  | H  | 2.795625  | 0.830989  | 2.566498  |
| C    | 4.323877  | 1.307979  | 2.782003  | H  | 1.675990  | -2.766119 | 2.308173  |
| C    | 3.216688  | 0.377930  | 2.241739  | H  | 3.364065  | -2.582445 | 1.838854  |
| H    | 4.323308  | 1.258649  | 3.880215  | C  | 2.048379  | 1.294429  | 0.458668  |
| H    | 5.321799  | 1.019820  | 2.444032  | C  | 3.374087  | 1.766416  | -0.180663 |
| C    | 1.849135  | 0.882514  | 2.762913  | C  | 1.214743  | 2.532080  | 0.815003  |
| C    | 3.401449  | -1.021398 | 2.873637  | O  | 3.816679  | 1.394349  | -1.247351 |
| H    | 1.564985  | 1.863726  | 2.381063  | O  | 0.702468  | 2.748444  | 1.890500  |
| H    | 1.050795  | 0.173913  | 2.518590  | O  | 3.998974  | 2.637707  | 0.631327  |
| H    | 1.897268  | 0.959257  | 3.857948  | O  | 1.135345  | 3.366795  | -0.243042 |
| H    | 4.408913  | -1.419879 | 2.739881  | C  | 5.283493  | 3.142771  | 0.180338  |
| H    | 3.229996  | -0.937779 | 3.955522  | H  | 5.953003  | 2.290520  | 0.027838  |
| H    | 2.683342  | -1.747991 | 2.480241  | H  | 5.139053  | 3.638625  | -0.784804 |
| O    | 1.085269  | -2.579522 | -1.015523 | C  | 5.799775  | 4.093405  | 1.244071  |
| C    | 1.419034  | -2.680279 | -2.370043 | H  | 6.772951  | 4.493484  | 0.936283  |
| H    | 2.409621  | -2.239546 | -2.589679 | H  | 5.112869  | 4.933998  | 1.389902  |
| H    | 0.702233  | -2.145568 | -3.022327 | H  | 5.926558  | 3.579909  | 2.203029  |
| C    | 1.455957  | -4.158716 | -2.781719 | C  | 0.449841  | 4.627226  | -0.029582 |
| H    | 0.476120  | -4.628712 | -2.632748 | H  | 0.924480  | 5.136538  | 0.815219  |
| H    | 1.733636  | -4.261268 | -3.840224 | H  | -0.588644 | 4.417795  | 0.243712  |
| H    | 2.186468  | -4.706066 | -2.174102 | C  | 0.552028  | 5.428911  | -1.313852 |
|      |           |           |           | H  | 0.081549  | 4.898403  | -2.148369 |
|      |           |           |           | H  | 0.043179  | 6.391667  | -1.186646 |
| TS16 |           |           |           | H  | 1.597793  | 5.624472  | -1.574123 |
| C    | 1.518414  | -1.005468 | 0.035754  | H  | 2.751052  | -1.721034 | 3.264556  |
| C    | 1.364885  | 0.300168  | -0.500352 | H  | 0.904491  | -3.024172 | -0.264822 |
| C    | 1.533284  | -2.285835 | -0.777508 | Pd | -0.701072 | -0.546374 | 0.151626  |
| H    | 1.427676  | 0.492859  | -1.565527 | P  | -2.998581 | 0.049749  | -0.308124 |
| H    | -0.239162 | 0.818233  | -0.518004 | C  | -3.744755 | 1.065350  | 1.174477  |
| C    | 2.915167  | -2.877089 | -1.039778 | C  | -3.237325 | 0.420260  | 2.485434  |
| C    | 2.395062  | 0.419382  | 1.648269  | C  | -3.182852 | 2.504358  | 1.169096  |
| C    | 3.135515  | -4.247699 | -0.838116 | C  | -5.285792 | 1.147972  | 1.214996  |
| C    | 3.974327  | -2.094118 | -1.524964 | H  | -3.598655 | -0.596837 | 2.634086  |
| C    | 2.148635  | -0.879656 | 1.379690  | H  | -2.143488 | 0.398822  | 2.520255  |
| C    | 4.378070  | -4.826371 | -1.115061 | H  | -3.590649 | 1.025726  | 3.331544  |
| H    | 2.324650  | -4.867382 | -0.460509 | H  | -3.578832 | 3.115381  | 0.353988  |
| C    | 5.218449  | -2.669237 | -1.800214 | H  | -3.479600 | 2.990363  | 2.108137  |
| H    | 3.833144  | -1.028288 | -1.684325 | H  | -2.089354 | 2.515907  | 1.133882  |
| C    | 2.498204  | -2.048553 | 2.250734  | H  | -5.579783 | 1.763286  | 2.076854  |
| C    | 5.426203  | -4.037369 | -1.597228 | H  | -5.710034 | 1.615283  | 0.322859  |
| H    | 4.525942  | -5.891280 | -0.951241 | H  | -5.756769 | 0.171153  | 1.344516  |
| H    | 6.025995  | -2.044915 | -2.175598 | H  | -4.704690 | 2.600330  | -1.376818 |

|   |           |           |           |
|---|-----------|-----------|-----------|
| C | -4.535249 | 1.812944  | -2.116181 |
| C | -3.160327 | 1.129177  | -1.935336 |
| H | -5.374441 | 1.117494  | -2.070744 |
| H | -4.560888 | 2.292020  | -3.104872 |
| C | -2.081365 | 2.236774  | -1.973691 |
| C | -2.877177 | 0.245517  | -3.172293 |
| H | -1.075421 | 1.817666  | -2.043493 |
| H | -2.249892 | 2.844826  | -2.873327 |
| H | -2.108909 | 2.907103  | -1.115305 |
| H | -2.794102 | 0.898571  | -4.051709 |
| H | -1.930551 | -0.296346 | -3.075148 |
| H | -3.670276 | -0.474535 | -3.380865 |
| H | -5.322412 | -1.034204 | -2.316380 |
| C | -5.415082 | -1.368859 | -1.280421 |
| C | -4.053689 | -1.569764 | -0.581169 |
| H | -5.930317 | -2.338960 | -1.305718 |
| H | -6.068296 | -0.670440 | -0.749527 |
| C | -3.192860 | -2.566770 | -1.398084 |
| C | -4.310845 | -2.262505 | 0.775334  |
| H | -2.925752 | -2.204607 | -2.391862 |
| H | -2.284673 | -2.824800 | -0.846041 |
| H | -3.778705 | -3.486916 | -1.535507 |
| H | -4.998735 | -1.710735 | 1.420504  |
| H | -4.776672 | -3.236259 | 0.570388  |
| H | -3.371907 | -2.451284 | 1.295947  |
| O | -1.055019 | -2.446699 | 1.023019  |
| C | -1.069515 | -2.594016 | 2.410222  |
| H | -2.016031 | -2.231690 | 2.864462  |
| H | -0.273754 | -2.008088 | 2.911231  |
| C | -0.912090 | -4.072371 | 2.794697  |
| H | 0.040008  | -4.474342 | 2.425304  |
| H | -0.945685 | -4.203615 | 3.885927  |
| H | -1.717863 | -4.667622 | 2.347633  |

Int 18

|   |           |           |           |
|---|-----------|-----------|-----------|
| C | 1.153086  | -1.380699 | -0.462446 |
| C | 0.477016  | -0.287382 | -0.058509 |
| C | 2.642074  | -1.628850 | -0.412843 |
| H | 0.880352  | 0.609736  | 0.391651  |
| C | 3.467825  | -0.472360 | 0.113100  |
| C | -1.061381 | -1.883605 | -0.889548 |
| C | 4.054420  | 0.448463  | -0.766132 |
| C | 3.654042  | -0.293004 | 1.491539  |

|   |           |           |           |
|---|-----------|-----------|-----------|
| C | 0.184523  | -2.388803 | -0.981279 |
| C | 4.807378  | 1.522690  | -0.283336 |
| H | 3.920653  | 0.323078  | -1.838946 |
| C | 4.405113  | 0.779333  | 1.979473  |
| H | 3.202668  | -0.996540 | 2.188133  |
| C | 0.578344  | -3.729326 | -1.526955 |
| C | 4.985124  | 1.691328  | 1.092552  |
| H | 5.257242  | 2.224035  | -0.981961 |
| H | 4.538470  | 0.900695  | 3.051675  |
| H | 5.572865  | 2.524070  | 1.470620  |
| H | 2.989114  | -1.896578 | -1.421317 |
| H | -1.985648 | -2.348244 | -1.210471 |
| H | 1.246937  | -3.627839 | -2.392382 |
| H | 1.115088  | -4.327363 | -0.778286 |
| C | -1.008360 | -0.492561 | -0.288488 |
| C | -1.814173 | -0.470460 | 1.023315  |
| C | -1.532944 | 0.587884  | -1.251520 |
| O | -1.347149 | -0.432360 | 2.139642  |
| O | -1.849121 | 0.411126  | -2.406931 |
| O | -3.136700 | -0.533990 | 0.759129  |
| O | -1.564813 | 1.786963  | -0.633312 |
| C | -4.025793 | -0.545004 | 1.905370  |
| H | -3.773867 | -1.407970 | 2.530000  |
| H | -3.844033 | 0.361309  | 2.491768  |
| C | -5.447935 | -0.613738 | 1.381432  |
| H | -6.149349 | -0.624138 | 2.223981  |
| H | -5.678659 | 0.252487  | 0.752147  |
| H | -5.606627 | -1.522035 | 0.790361  |
| C | -2.012913 | 2.914588  | -1.428395 |
| H | -3.023778 | 2.701617  | -1.790619 |
| H | -1.354464 | 3.007424  | -2.297914 |
| C | -1.967730 | 4.145623  | -0.542834 |
| H | -0.950634 | 4.334840  | -0.183511 |
| H | -2.300215 | 5.020665  | -1.113594 |
| H | -2.625213 | 4.030980  | 0.325615  |
| H | -0.300754 | -4.297764 | -1.846473 |
| H | 2.825820  | -2.521089 | 0.204312  |

TS17

|   |          |          |           |
|---|----------|----------|-----------|
| S | 4.374119 | 1.348657 | -0.410840 |
| O | 5.363085 | 2.141261 | 0.327683  |
| O | 3.819666 | 1.795243 | -1.691890 |
| N | 3.043003 | 1.170727 | 0.630241  |

|    |           |           |           |   |           |           |           |
|----|-----------|-----------|-----------|---|-----------|-----------|-----------|
| C  | 5.064337  | -0.292599 | -0.660871 | C | 0.521892  | -2.668576 | -0.014912 |
| C  | 4.620738  | -1.071682 | -1.731776 | H | 1.229460  | -2.378845 | 0.790352  |
| C  | 1.840869  | 0.496203  | 0.070992  | H | 0.996115  | -2.345631 | -0.966942 |
| C  | 0.699592  | 0.679043  | 1.054503  | C | 0.445754  | -4.202447 | -0.023155 |
| C  | 3.305439  | 0.972990  | 2.005762  | H | -0.190337 | -4.554686 | -0.844253 |
| C  | 6.021229  | -0.783991 | 0.234248  | H | 1.445269  | -4.643911 | -0.145353 |
| C  | 2.408501  | 0.469101  | 2.871082  | H | 0.017790  | -4.568086 | 0.918617  |
| C  | -0.008565 | 2.940892  | -0.001201 | P | -3.592577 | -0.558784 | -0.146436 |
| C  | -0.129858 | 1.832512  | 0.996128  | C | -4.463587 | -0.905533 | 1.559809  |
| C  | -0.137231 | 2.761989  | -1.386940 | C | -3.513065 | -1.787212 | 2.406257  |
| C  | 1.011775  | 0.079370  | 2.420337  | C | -4.633619 | 0.415104  | 2.344108  |
| C  | 6.526237  | -2.070015 | 0.050936  | C | -5.844100 | -1.591668 | 1.472320  |
| C  | 6.091908  | -2.879386 | -1.012694 | H | -3.326113 | -2.767694 | 1.970423  |
| C  | 5.138292  | -2.358231 | -1.898624 | H | -2.540983 | -1.304030 | 2.546200  |
| C  | 0.265330  | 4.229374  | 0.486334  | H | -3.969068 | -1.937724 | 3.394878  |
| C  | 0.033524  | 3.835052  | -2.263144 | H | -5.398716 | 1.070017  | 1.920074  |
| C  | 2.734531  | 0.298351  | 4.331519  | H | -4.951577 | 0.168798  | 3.366110  |
| C  | 0.324127  | 5.109749  | -1.768202 | H | -3.693794 | 0.971671  | 2.418777  |
| C  | 0.436546  | 5.304037  | -0.388988 | H | -6.244347 | -1.703205 | 2.489803  |
| C  | 6.642086  | -4.275588 | -1.188890 | H | -6.571395 | -1.011192 | 0.899407  |
| H  | 3.898720  | -0.668483 | -2.434349 | H | -5.789237 | -2.592558 | 1.039233  |
| H  | 2.049618  | -0.570158 | -0.065070 | H | -6.421121 | 1.024249  | 0.050781  |
| H  | 1.635048  | 0.945139  | -0.897395 | C | -6.032592 | 0.888038  | -0.962030 |
| H  | 4.281727  | 1.319803  | 2.325763  | C | -4.488676 | 0.951556  | -1.008015 |
| H  | 6.380332  | -0.157436 | 1.044076  | H | -6.439498 | -0.042462 | -1.361196 |
| H  | -0.503111 | 2.173676  | 1.961492  | H | -6.435200 | 1.709222  | -1.571030 |
| H  | -0.389243 | 1.777865  | -1.774433 | C | -4.052585 | 2.292080  | -0.368452 |
| H  | 0.916462  | -1.015443 | 2.397445  | C | -4.040098 | 1.042445  | -2.485259 |
| H  | 0.279052  | 0.428647  | 3.161044  | H | -2.995811 | 2.501414  | -0.550220 |
| H  | 7.277380  | -2.448892 | 0.740787  | H | -4.629996 | 3.097892  | -0.842088 |
| H  | 4.797465  | -2.962297 | -2.736164 | H | -4.233516 | 2.350791  | 0.704826  |
| H  | 0.361546  | 4.388125  | 1.558334  | H | -4.408022 | 1.990952  | -2.898990 |
| H  | -0.062600 | 3.674335  | -3.333845 | H | -2.949464 | 1.047184  | -2.579530 |
| H  | 2.068119  | 0.900664  | 4.966453  | H | -4.440797 | 0.241798  | -3.109377 |
| H  | 3.766742  | 0.590916  | 4.554136  | H | -5.429664 | -1.484613 | -2.666152 |
| H  | 2.606104  | -0.748031 | 4.644937  | C | -5.190301 | -2.278474 | -1.954504 |
| H  | 0.458678  | 5.944231  | -2.451278 | C | -3.801612 | -2.115772 | -1.300374 |
| H  | 0.659434  | 6.291058  | 0.007987  | H | -5.190229 | -3.221617 | -2.518312 |
| H  | 7.738515  | -4.278109 | -1.165074 | H | -6.000431 | -2.340916 | -1.222300 |
| H  | 6.323483  | -4.714854 | -2.139592 | C | -2.718144 | -2.027470 | -2.403895 |
| H  | 6.298981  | -4.938619 | -0.383910 | C | -3.494549 | -3.404852 | -0.502339 |
| H  | -1.763862 | 1.369490  | 0.645045  | H | -2.838966 | -1.168573 | -3.066248 |
| Pd | -1.246634 | -0.097789 | 0.376848  | H | -1.723776 | -2.000467 | -1.949920 |
| O  | -0.742076 | -2.118285 | 0.155618  | H | -2.788946 | -2.930453 | -3.026673 |

|        |           |           |           |    |           |           |           |
|--------|-----------|-----------|-----------|----|-----------|-----------|-----------|
| H      | -4.273705 | -3.651803 | 0.223384  | H  | 3.657277  | 0.724092  | 4.532667  |
| H      | -3.454172 | -4.237272 | -1.219050 | H  | 2.570086  | -0.671411 | 4.669980  |
| H      | -2.521588 | -3.335523 | -0.010040 | H  | 1.271710  | 5.796721  | -2.409663 |
|        |           |           |           | H  | 0.018843  | 3.816294  | -3.253223 |
|        |           |           |           | H  | 7.209270  | -4.487331 | -1.976207 |
| Int 19 |           |           |           | H  | 5.990243  | -5.108895 | -0.860478 |
| S      | 4.320738  | 1.244687  | -0.456251 | H  | 7.537030  | -4.514544 | -0.235050 |
| O      | 5.277159  | 2.096720  | 0.259586  | H  | -1.252499 | 1.612660  | 0.798151  |
| O      | 3.774621  | 1.618798  | -1.763593 | Pd | -1.218222 | -0.185891 | 0.331937  |
| N      | 2.983219  | 1.067362  | 0.572655  | O  | -0.924972 | -2.177510 | -0.003776 |
| C      | 5.063302  | -0.384494 | -0.627143 | C  | 0.331073  | -2.775546 | -0.122764 |
| C      | 4.652204  | -1.224445 | -1.667893 | H  | 0.984536  | -2.559982 | 0.744788  |
| C      | 1.794652  | 0.355328  | 0.026346  | H  | 0.873895  | -2.422440 | -1.021735 |
| C      | 0.628460  | 0.504008  | 0.987217  | C  | 0.168292  | -4.297710 | -0.223397 |
| C      | 3.229950  | 0.949236  | 1.958491  | H  | -0.433746 | -4.565749 | -1.099656 |
| C      | 6.023973  | -0.806744 | 0.294787  | H  | 1.148420  | -4.786526 | -0.313814 |
| C      | 2.342964  | 0.442878  | 2.833011  | H  | -0.334144 | -4.689540 | 0.669194  |
| C      | 0.260426  | 2.928816  | 0.034261  | P  | -3.702408 | -0.442583 | -0.140466 |
| C      | -0.113512 | 1.826080  | 1.002541  | C  | -4.543293 | -0.924652 | 1.549430  |
| C      | 0.959711  | 4.050888  | 0.500061  | C  | -3.631400 | -1.960468 | 2.252752  |
| C      | 0.983673  | -0.048908 | 2.367301  | C  | -4.580411 | 0.305931  | 2.484011  |
| C      | 6.569479  | -2.086447 | 0.172106  | C  | -5.973143 | -1.497992 | 1.452510  |
| C      | 6.170749  | -2.952350 | -0.856642 | H  | -3.552766 | -2.905072 | 1.716250  |
| C      | 5.207793  | -2.498782 | -1.773594 | H  | -2.614831 | -1.576297 | 2.382715  |
| C      | -0.078809 | 2.863480  | -1.323892 | H  | -4.050062 | -2.172779 | 3.246647  |
| C      | 1.322539  | 5.078064  | -0.374068 | H  | -5.302301 | 1.063622  | 2.169948  |
| C      | 2.647463  | 0.363701  | 4.305966  | H  | -4.882065 | -0.029702 | 3.485349  |
| C      | 0.985403  | 5.000005  | -1.728202 | H  | -3.595798 | 0.776080  | 2.582248  |
| C      | 0.282861  | 3.888666  | -2.201199 | H  | -6.343401 | -1.696430 | 2.468425  |
| C      | 6.760742  | -4.337491 | -0.986319 | H  | -6.676431 | -0.808232 | 0.979250  |
| H      | 3.925130  | -0.872835 | -2.392701 | H  | -6.008337 | -2.445159 | 0.909593  |
| H      | 2.030700  | -0.709136 | -0.090993 | H  | -6.401270 | 1.295850  | 0.374473  |
| H      | 1.582645  | 0.780732  | -0.952877 | C  | -6.067243 | 1.265406  | -0.666010 |
| H      | 4.182854  | 1.358533  | 2.275796  | C  | -4.528573 | 1.205247  | -0.786734 |
| H      | 6.356584  | -0.135844 | 1.080075  | H  | -6.567119 | 0.429432  | -1.159652 |
| H      | -0.180489 | 2.218393  | 2.023823  | H  | -6.423811 | 2.189149  | -1.143213 |
| H      | 1.234693  | 4.114328  | 1.550604  | C  | -3.936362 | 2.415308  | -0.023098 |
| H      | 0.971766  | -1.148942 | 2.350068  | C  | -4.143976 | 1.433669  | -2.267232 |
| H      | 0.218957  | 0.243376  | 3.100724  | H  | -2.870126 | 2.537845  | -0.230837 |
| H      | 7.323994  | -2.412159 | 0.884399  | H  | -4.437177 | 3.327275  | -0.375969 |
| H      | 4.893020  | -3.149273 | -2.586887 | H  | -4.073202 | 2.368190  | 1.057396  |
| H      | -0.625507 | 1.998220  | -1.694988 | H  | -4.455016 | 2.447525  | -2.553359 |
| H      | 1.874458  | 5.935327  | 0.002664  | H  | -3.062271 | 1.369030  | -2.423294 |
| H      | 1.935837  | 0.957895  | 4.898164  | H  | -4.634973 | 0.740517  | -2.952648 |

|        |           |           |           |    |           |           |           |
|--------|-----------|-----------|-----------|----|-----------|-----------|-----------|
| H      | -5.692644 | -0.962981 | -2.657570 | H  | 6.465225  | 0.448794  | 0.159662  |
| C      | -5.479447 | -1.848864 | -2.054389 | H  | -1.099403 | 1.438346  | -0.867408 |
| C      | -4.061835 | -1.844141 | -1.444366 | H  | -2.074996 | 2.886904  | 0.924452  |
| H      | -5.563550 | -2.717147 | -2.722933 | H  | 1.082471  | 0.584623  | 2.386481  |
| H      | -6.264409 | -1.945609 | -1.298797 | H  | 0.414577  | 2.165390  | 2.048161  |
| C      | -3.011707 | -1.701018 | -2.574312 | H  | 7.574921  | -1.493028 | 1.233370  |
| C      | -3.810363 | -3.231063 | -0.807571 | H  | 4.893626  | -4.161158 | -0.814681 |
| H      | -3.098424 | -0.768519 | -3.134670 | H  | 1.445554  | 4.057037  | -1.244700 |
| H      | -2.000511 | -1.779927 | -2.165358 | H  | -2.435613 | 5.239696  | 1.619051  |
| H      | -3.157798 | -2.523540 | -3.288759 | H  | 2.270487  | 3.707964  | 2.960723  |
| H      | -4.579836 | -3.511910 | -0.083833 | H  | 3.958899  | 3.206945  | 2.732295  |
| H      | -3.842931 | -3.979731 | -1.611668 | H  | 2.870391  | 2.253730  | 3.760246  |
| H      | -2.822780 | -3.277865 | -0.342782 | H  | -0.851749 | 7.015124  | 0.879720  |
|        |           |           |           | H  | 1.090612  | 6.409838  | -0.558600 |
|        |           |           |           | H  | 7.356831  | -4.858882 | 0.187780  |
| Int 20 |           |           |           | H  | 6.285288  | -4.709471 | 1.583040  |
| S      | 4.198801  | 0.635785  | -1.636068 | H  | 7.832374  | -3.847379 | 1.562678  |
| O      | 5.146638  | 1.754879  | -1.677532 | H  | 0.415056  | 1.856816  | -1.634785 |
| O      | 3.508266  | 0.161612  | -2.840587 | Pd | -1.116999 | -0.090971 | 0.215328  |
| N      | 2.971739  | 1.097391  | -0.560138 | O  | -0.812039 | -1.625812 | 1.533230  |
| C      | 5.041301  | -0.772594 | -0.903584 | C  | 0.439322  | -2.198926 | 1.769990  |
| C      | 4.598069  | -2.068590 | -1.189662 | H  | 1.193283  | -1.453685 | 2.087013  |
| C      | 1.820616  | 0.171808  | -0.394684 | H  | 0.848880  | -2.691539 | 0.864625  |
| C      | 0.688938  | 0.925020  | 0.290805  | C  | 0.322112  | -3.246242 | 2.885212  |
| C      | 3.333855  | 1.842572  | 0.590271  | H  | -0.369790 | -4.047006 | 2.598974  |
| C      | 6.111817  | -0.559034 | -0.032030 | H  | 1.302149  | -3.696130 | 3.097447  |
| C      | 2.516114  | 2.011330  | 1.643548  | H  | -0.055078 | -2.782651 | 3.804541  |
| C      | -0.290132 | 3.308625  | -0.205058 | P  | -3.466851 | -0.910616 | -0.278894 |
| C      | -0.038043 | 1.879277  | -0.637397 | C  | -4.642308 | -0.605450 | 1.243016  |
| C      | -1.380775 | 3.659823  | 0.601448  | C  | -3.849358 | -0.933028 | 2.531920  |
| C      | 1.117922  | 1.415838  | 1.667468  | C  | -4.996617 | 0.895970  | 1.332970  |
| C      | 6.736083  | -1.658326 | 0.561338  | C  | -5.960907 | -1.408001 | 1.244443  |
| C      | 6.308427  | -2.967953 | 0.298802  | H  | -3.604278 | -1.989414 | 2.631220  |
| C      | 5.233682  | -3.153112 | -0.587074 | H  | -2.906537 | -0.381362 | 2.582636  |
| C      | 0.594470  | 4.315664  | -0.619220 | H  | -4.466513 | -0.650063 | 3.396372  |
| C      | -1.583130 | 4.986159  | 0.993671  | H  | -5.685003 | 1.222761  | 0.549865  |
| C      | 2.931353  | 2.839083  | 2.831189  | H  | -5.495325 | 1.075703  | 2.294692  |
| C      | -0.694662 | 5.982405  | 0.579154  | H  | -4.104645 | 1.530978  | 1.306674  |
| C      | 0.394889  | 5.642348  | -0.228882 | H  | -6.543286 | -1.125794 | 2.133088  |
| C      | 6.984281  | -4.155923 | 0.943163  | H  | -6.583727 | -1.204809 | 0.369593  |
| H      | 3.782734  | -2.220607 | -1.889478 | H  | -5.795270 | -2.486065 | 1.301441  |
| H      | 2.125942  | -0.687376 | 0.215376  | H  | -6.344822 | 0.262062  | -1.254261 |
| H      | 1.532057  | -0.177806 | -1.386889 | C  | -5.758658 | -0.228387 | -2.036129 |
| H      | 4.303046  | 2.324686  | 0.526671  | C  | -4.239853 | -0.026933 | -1.841407 |

|      |           |           |           |    |           |           |           |
|------|-----------|-----------|-----------|----|-----------|-----------|-----------|
| H    | -6.049725 | -1.279962 | -2.070327 | C  | -0.538758 | 4.399150  | -0.935667 |
| H    | -6.056825 | 0.226386  | -2.991399 | C  | -2.268295 | 4.585203  | 1.243470  |
| C    | -3.967809 | 1.495320  | -1.768692 | C  | 2.933817  | 2.895239  | 2.952784  |
| C    | -3.509572 | -0.511878 | -3.115579 | C  | -1.970183 | 5.728810  | 0.495280  |
| H    | -2.897604 | 1.716864  | -1.771206 | C  | -1.104203 | 5.631057  | -0.597295 |
| H    | -4.396595 | 1.967455  | -2.663164 | C  | 6.821167  | -4.051250 | 0.854944  |
| H    | -4.410937 | 1.983504  | -0.901260 | H  | 3.790445  | -1.904753 | -2.018967 |
| H    | -3.819958 | 0.122029  | -3.957182 | H  | 2.115260  | -0.442830 | 0.097272  |
| H    | -2.421754 | -0.422033 | -3.023132 | H  | 1.556289  | 0.186593  | -1.474150 |
| H    | -3.750338 | -1.542116 | -3.384439 | H  | 4.343377  | 2.491801  | 0.651791  |
| H    | -4.744750 | -3.032993 | -2.394624 | H  | 6.455488  | 0.591857  | 0.257886  |
| C    | -4.622479 | -3.416393 | -1.378523 | H  | 0.118577  | 1.951292  | -1.635283 |
| C    | -3.399448 | -2.823879 | -0.647653 | H  | -1.953027 | 2.463040  | 1.473527  |
| H    | -4.482005 | -4.503235 | -1.462444 | H  | 0.995344  | 0.771282  | 2.357998  |
| H    | -5.557568 | -3.252368 | -0.835338 | H  | 0.422276  | 2.391959  | 2.038988  |
| C    | -2.123639 | -3.089866 | -1.485238 | H  | 7.480275  | -1.426641 | 1.270378  |
| C    | -3.204470 | -3.602861 | 0.673660  | H  | 4.816747  | -3.923369 | -1.004149 |
| H    | -2.134673 | -2.610117 | -2.465262 | H  | 0.137072  | 4.331811  | -1.785377 |
| H    | -1.230689 | -2.759003 | -0.946637 | H  | -2.950079 | 4.648382  | 2.087942  |
| H    | -2.036884 | -4.172520 | -1.653154 | H  | 2.293888  | 3.772098  | 3.127672  |
| H    | -4.106556 | -3.624120 | 1.290353  | H  | 3.972397  | 3.240057  | 2.898006  |
| H    | -2.969467 | -4.645929 | 0.418664  | H  | 2.837792  | 2.252211  | 3.839619  |
| H    | -2.371581 | -3.194028 | 1.251392  | H  | -2.415351 | 6.685193  | 0.757074  |
|      |           |           |           | H  | -0.869192 | 6.511556  | -1.189736 |
|      |           |           |           | H  | 6.270629  | -4.338030 | 1.761258  |
|      |           |           |           | H  | 7.862647  | -3.877515 | 1.146135  |
|      |           |           |           | H  | 6.795978  | -4.908258 | 0.173162  |
|      |           |           |           | H  | -1.473438 | 1.029063  | -0.999890 |
| TS18 |           |           |           | Pd | -1.106100 | 0.006433  | 0.158091  |
| S    | 4.259291  | 0.924864  | -1.602504 | O  | -0.632054 | -1.274651 | 1.752590  |
| O    | 5.236598  | 2.017579  | -1.561177 | C  | 0.579331  | -1.943416 | 1.896304  |
| O    | 3.591485  | 0.527317  | -2.846885 | H  | 1.453626  | -1.260687 | 1.893924  |
| N    | 3.012097  | 1.369080  | -0.541034 | H  | 0.763389  | -2.665352 | 1.069888  |
| C    | 5.041061  | -0.539502 | -0.913821 | C  | 0.609398  | -2.715321 | 3.223531  |
| C    | 4.580382  | -1.807249 | -1.281333 | H  | -0.197413 | -3.457401 | 3.261638  |
| C    | 1.840179  | 0.462083  | -0.458101 | H  | 1.567811  | -3.238418 | 3.353175  |
| C    | 0.721219  | 1.203643  | 0.256587  | H  | 0.471134  | -2.025680 | 4.065296  |
| C    | 3.360902  | 2.033443  | 0.661635  | P  | -3.225392 | -1.120740 | -0.295009 |
| C    | 6.084715  | -0.396128 | 0.005419  | C  | -4.451182 | -0.996901 | 1.213670  |
| C    | 2.522844  | 2.158126  | 1.704947  | C  | -3.649227 | -1.173167 | 2.525202  |
| C    | -0.819283 | 3.247398  | -0.181703 | C  | -5.058523 | 0.423193  | 1.267708  |
| C    | -0.141917 | 1.975130  | -0.576911 | C  | -5.611260 | -2.015743 | 1.198725  |
| C    | -1.700813 | 3.355021  | 0.905665  | H  | -3.252861 | -2.178851 | 2.655053  |
| C    | 1.102928  | 1.618403  | 1.666925  | H  | -2.797376 | -0.491984 | 2.587362  |
| C    | 6.660922  | -1.537442 | 0.563709  |    |           |           |           |
| C    | 6.210929  | -2.822584 | 0.222021  |    |           |           |           |
| C    | 5.168941  | -2.936772 | -0.711497 |    |           |           |           |



|        |           |           |           |   |           |           |           |
|--------|-----------|-----------|-----------|---|-----------|-----------|-----------|
| H      | -4.327384 | -0.969256 | 3.365903  | C | -0.226311 | 3.841504  | -0.636739 |
| H      | -5.794178 | 0.603611  | 0.480331  | S | 3.545370  | -0.066337 | 1.509080  |
| H      | -5.581724 | 0.535550  | 2.226437  | C | 1.991365  | -0.557414 | -0.649532 |
| H      | -4.292203 | 1.203762  | 1.219732  | C | -0.149446 | 4.105842  | 0.743843  |
| H      | -6.253067 | -1.823932 | 2.070146  | C | -0.484539 | 4.918766  | -1.509017 |
| H      | -6.240089 | -1.937677 | 0.308564  | O | 2.903785  | -1.227473 | 2.152192  |
| H      | -5.262494 | -3.047499 | 1.281667  | O | 3.850964  | 1.135044  | 2.297635  |
| H      | -6.250790 | -0.510109 | -1.322511 | C | 5.044971  | -0.651661 | 0.714454  |
| C      | -5.569015 | -0.892835 | -2.086647 | C | 1.127584  | 0.267541  | -1.632116 |
| C      | -4.120377 | -0.396316 | -1.876932 | C | -0.292649 | 5.408184  | 1.225407  |
| H      | -5.654838 | -1.980705 | -2.106890 | H | -0.037915 | 3.288513  | 1.446262  |
| H      | -5.931607 | -0.517664 | -3.053689 | C | -0.622737 | 6.219432  | -1.027028 |
| C      | -4.161371 | 1.150537  | -1.828081 | H | -0.566274 | 4.728986  | -2.577458 |
| C      | -3.289294 | -0.751179 | -3.131464 | C | 5.311696  | -2.019073 | 0.665296  |
| H      | -3.160823 | 1.586100  | -1.775537 | C | 5.947234  | 0.278218  | 0.185974  |
| H      | -4.627809 | 1.508030  | -2.756134 | C | -0.193885 | -0.428587 | -1.977124 |
| H      | -4.743710 | 1.550109  | -0.998654 | C | 1.958364  | 0.651064  | -2.876041 |
| H      | -3.701522 | -0.201570 | -3.988156 | C | -0.520770 | 6.470359  | 0.345646  |
| H      | -2.241353 | -0.452104 | -3.023709 | H | -0.238715 | 5.590006  | 2.295752  |
| H      | -3.325539 | -1.812584 | -3.384726 | H | -0.813103 | 7.035291  | -1.719853 |
| H      | -4.066397 | -3.471562 | -2.396360 | C | 6.496137  | -2.459647 | 0.066320  |
| C      | -3.897670 | -3.807347 | -1.369892 | H | 4.607795  | -2.721594 | 1.099732  |
| C      | -2.811488 | -2.994049 | -0.635432 | C | 7.120980  | -0.178720 | -0.407167 |
| H      | -3.564116 | -4.852905 | -1.426369 | H | 5.732330  | 1.340440  | 0.247575  |
| H      | -4.856611 | -3.802673 | -0.844238 | H | -0.644699 | 0.023776  | -2.874141 |
| C      | -1.500083 | -3.042594 | -1.458289 | H | -0.066198 | -1.491442 | -2.165651 |
| C      | -2.500038 | -3.697130 | 0.705454  | H | 2.190407  | -0.246752 | -3.463765 |
| H      | -1.585006 | -2.586521 | -2.445778 | H | 1.401095  | 1.339508  | -3.520640 |
| H      | -0.682924 | -2.550565 | -0.921844 | H | 2.901399  | 1.134896  | -2.592275 |
| H      | -1.221713 | -4.095301 | -1.605446 | H | -0.631149 | 7.482386  | 0.726648  |
| H      | -3.398604 | -3.891973 | 1.296733  | C | 7.415157  | -1.552879 | -0.477705 |
| H      | -2.048738 | -4.673458 | 0.480422  | H | 6.707610  | -3.525727 | 0.028929  |
| H      | -1.793095 | -3.112766 | 1.301124  | H | 7.825576  | 0.541638  | -0.817279 |
|        |           |           |           | C | 8.699654  | -2.027896 | -1.116126 |
|        |           |           |           | H | 9.574377  | -1.657201 | -0.566685 |
| Int 21 |           |           |           | H | 8.756694  | -3.120852 | -1.137535 |
| Pd     | -1.423092 | 0.261092  | -0.457785 | H | 8.788824  | -1.664901 | -2.147601 |
| P      | -2.650521 | -1.747189 | -0.002199 | H | -0.419747 | 2.398972  | -2.236394 |
| C      | 0.781701  | 1.507238  | -0.776969 | C | -1.642870 | -3.429141 | 0.187485  |
| C      | 1.617519  | 1.508749  | 0.487104  | C | -0.544831 | -3.588859 | -0.887871 |
| C      | -0.014172 | 2.513057  | -1.230761 | C | -0.886534 | -3.431805 | 1.536591  |
| N      | 2.641181  | 0.475593  | 0.182898  | C | -2.529196 | -4.695034 | 0.103706  |
| H      | 2.099990  | 2.470369  | 0.679954  | H | -0.908158 | -3.506964 | -1.912137 |
| H      | 1.015557  | 1.245489  | 1.368548  | H | 0.262080  | -2.871437 | -0.743851 |

|   |           |           |           |      |           |           |           |
|---|-----------|-----------|-----------|------|-----------|-----------|-----------|
| H | -0.110892 | -4.591689 | -0.774288 |      |           |           |           |
| H | -1.541868 | -3.544145 | 2.400874  | TS19 |           |           |           |
| H | -0.199545 | -4.288576 | 1.540350  | Pd   | 1.339757  | 0.597073  | 0.592912  |
| H | -0.279947 | -2.531029 | 1.672937  | P    | 3.188696  | -0.943114 | -0.308219 |
| H | -1.909993 | -5.561741 | 0.373230  | C    | -0.978242 | 0.404973  | 1.064801  |
| H | -3.382984 | -4.685524 | 0.779697  | C    | -1.803793 | -0.132793 | -0.097831 |
| H | -2.896343 | -4.871869 | -0.910969 | C    | -0.377478 | 1.721534  | 1.091516  |
| H | -3.555354 | -3.556694 | 2.573906  | N    | -2.307908 | -1.420011 | 0.410505  |
| C | -4.289642 | -2.823463 | 2.234378  | H    | -2.612953 | 0.592129  | -0.288298 |
| C | -3.654177 | -1.532695 | 1.670212  | H    | -1.257639 | -0.291048 | -1.026183 |
| H | -4.971722 | -3.311458 | 1.532764  | C    | -0.755418 | 2.786624  | 0.121801  |
| H | -4.882008 | -2.540252 | 3.114898  | S    | -3.410941 | -2.295696 | -0.500717 |
| C | -2.706677 | -0.925883 | 2.735830  | C    | -2.444339 | -1.349052 | 1.872765  |
| C | -4.792437 | -0.509067 | 1.470860  | C    | -0.708157 | 2.626649  | -1.276054 |
| H | -2.360106 | 0.060839  | 2.418684  | C    | -1.184606 | 4.029853  | 0.623420  |
| H | -3.284670 | -0.800751 | 3.662734  | O    | -3.616698 | -3.553465 | 0.225128  |
| H | -1.852247 | -1.559519 | 2.974794  | O    | -2.904569 | -2.260481 | -1.876849 |
| H | -5.227004 | -0.298023 | 2.457288  | C    | -4.961371 | -1.385656 | -0.467082 |
| H | -4.407130 | 0.429177  | 1.078151  | C    | -1.283879 | -0.434123 | 2.270698  |
| H | -5.602966 | -0.882370 | 0.839799  | C    | -1.104266 | 3.654366  | -2.131904 |
| H | -5.773509 | -2.452376 | -0.406778 | H    | -0.316476 | 1.706278  | -1.697447 |
| C | -5.130156 | -2.852738 | -1.192667 | C    | -1.574551 | 5.063950  | -0.231343 |
| C | -3.907291 | -1.954062 | -1.479299 | H    | -1.215098 | 4.185318  | 1.699911  |
| H | -5.737734 | -2.910583 | -2.106522 | C    | -5.902116 | -1.660262 | 0.528935  |
| H | -4.854574 | -3.874204 | -0.922452 | C    | -5.202955 | -0.394706 | -1.426154 |
| C | -4.409730 | -0.545595 | -1.874671 | C    | 0.070783  | -0.924727 | 1.818598  |
| C | -3.176759 | -2.519803 | -2.717831 | C    | -1.394882 | 0.179051  | 3.655268  |
| H | -4.972390 | -0.050690 | -1.083017 | C    | -1.543419 | 4.878508  | -1.615622 |
| H | -3.577852 | 0.109999  | -2.153263 | H    | -1.049033 | 3.505371  | -3.207610 |
| H | -5.073382 | -0.642802 | -2.745096 | H    | -1.900036 | 6.013687  | 0.186429  |
| H | -2.906581 | -3.572820 | -2.607793 | C    | -7.089379 | -0.925044 | 0.566223  |
| H | -3.856389 | -2.451758 | -3.577954 | H    | -5.717428 | -2.454740 | 1.244991  |
| H | -2.278370 | -1.947289 | -2.963797 | C    | -6.392844 | 0.329509  | -1.371146 |
| O | -2.403476 | 1.517049  | 0.908833  | H    | -4.479594 | -0.214212 | -2.214848 |
| C | -3.253474 | 2.491126  | 0.376795  | H    | 0.860881  | -0.733113 | 2.543789  |
| H | -4.122059 | 2.044785  | -0.154564 | H    | 0.089837  | -1.886416 | 1.325664  |
| H | -2.750400 | 3.128339  | -0.375076 | H    | -1.451129 | -0.611023 | 4.414595  |
| C | -3.798429 | 3.398147  | 1.488511  | H    | -0.525487 | 0.800322  | 3.892327  |
| H | -2.974256 | 3.897450  | 2.009997  | H    | -2.292738 | 0.803256  | 3.742952  |
| H | -4.466108 | 4.167868  | 1.075472  | H    | -1.843134 | 5.680869  | -2.284985 |
| H | -4.358537 | 2.810035  | 2.226016  | C    | -7.353239 | 0.079569  | -0.376172 |
| H | 2.748007  | -1.162961 | -1.157984 | H    | -7.825741 | -1.144737 | 1.335742  |
| H | 1.362916  | -1.211127 | -0.032414 | H    | -6.582540 | 1.096136  | -2.119240 |
|   |           |           |           | C    | -8.642355 | 0.866888  | -0.340666 |

|   |           |           |           |        |           |           |           |
|---|-----------|-----------|-----------|--------|-----------|-----------|-----------|
| H | -9.240690 | 0.685480  | -1.242598 | C      | 2.583372  | 3.271536  | 1.041056  |
| H | -9.253854 | 0.596614  | 0.526041  | H      | 3.191960  | 2.918907  | 1.901362  |
| H | -8.447627 | 1.945398  | -0.293790 | H      | 1.615985  | 3.601721  | 1.466072  |
| H | -0.243094 | 2.117476  | 2.099590  | C      | 3.269567  | 4.499645  | 0.427991  |
| C | 2.551304  | -2.478618 | -1.345556 | H      | 2.664972  | 4.897661  | -0.395421 |
| C | 1.293557  | -3.074430 | -0.673931 | H      | 3.399702  | 5.290013  | 1.181255  |
| C | 2.073984  | -2.005975 | -2.738583 | H      | 4.256796  | 4.237565  | 0.028605  |
| C | 3.575389  | -3.618757 | -1.541164 | H      | -3.399664 | -0.892074 | 2.180901  |
| H | 1.461944  | -3.418380 | 0.347642  | H      | -2.373262 | -2.351092 | 2.303971  |
| H | 0.467988  | -2.359294 | -0.672336 |        |           |           |           |
| H | 0.963736  | -3.943805 | -1.258270 |        |           |           |           |
| H | 2.893265  | -1.730371 | -3.404677 | Int 22 |           |           |           |
| H | 1.531029  | -2.832800 | -3.215598 | Pd     | -1.463545 | 0.100891  | 0.564241  |
| H | 1.381690  | -1.160577 | -2.668674 | P      | -3.645516 | -0.327345 | -0.622955 |
| H | 3.136887  | -4.370758 | -2.212366 | C      | 1.357173  | 1.120243  | 0.302462  |
| H | 4.510848  | -3.284811 | -1.993222 | C      | 2.296332  | 0.327536  | -0.608345 |
| H | 3.813235  | -4.130702 | -0.604970 | C      | 0.490462  | 0.415858  | 1.306360  |
| H | 4.889392  | -1.428709 | -3.045894 | N      | 3.291249  | 1.331182  | -1.031284 |
| C | 5.395228  | -0.820137 | -2.292485 | H      | 2.757155  | -0.498313 | -0.043961 |
| C | 4.421183  | 0.043242  | -1.461350 | H      | 1.820547  | -0.081429 | -1.503430 |
| H | 6.018748  | -1.478228 | -1.681568 | C      | 0.385627  | -1.023549 | 1.452420  |
| H | 6.070962  | -0.142927 | -2.833513 | S      | 4.576696  | 0.870102  | -1.993451 |
| C | 3.586867  | 0.924601  | -2.425650 | C      | 3.475718  | 2.348576  | 0.016794  |
| C | 5.258776  | 1.021361  | -0.605847 | C      | 0.215676  | -1.863150 | 0.310790  |
| H | 2.948553  | 1.612954  | -1.866669 | C      | 0.239896  | -1.626826 | 2.741364  |
| H | 4.287365  | 1.524697  | -3.024381 | O      | 5.277572  | 2.105858  | -2.359567 |
| H | 2.983605  | 0.346802  | -3.127101 | O      | 4.022908  | -0.041107 | -3.002246 |
| H | 5.811951  | 1.679284  | -1.290453 | C      | 5.692551  | -0.091889 | -0.957477 |
| H | 4.609073  | 1.650031  | 0.005899  | C      | 2.106550  | 2.418613  | 0.680223  |
| H | 6.001243  | 0.517157  | 0.017960  | C      | -0.024574 | -3.245267 | 0.470589  |
| H | 6.287922  | -1.423156 | 0.529190  | H      | 0.418781  | -1.478595 | -0.682778 |
| C | 5.605487  | -2.182434 | 0.916206  | C      | 0.005888  | -2.981037 | 2.874892  |
| C | 4.199363  | -1.621727 | 1.218413  | H      | 0.339378  | -0.997499 | 3.622223  |
| H | 6.042418  | -2.560041 | 1.851878  | C      | 6.712220  | 0.553830  | -0.253743 |
| H | 5.584282  | -3.014968 | 0.208595  | C      | 5.516440  | -1.476213 | -0.847864 |
| C | 4.333204  | -0.461138 | 2.235346  | C      | 0.932100  | 2.478849  | -0.252707 |
| C | 3.399253  | -2.732978 | 1.936313  | C      | 2.058790  | 3.063741  | 2.047213  |
| H | 4.935092  | 0.368478  | 1.864376  | C      | -0.124415 | -3.805249 | 1.733802  |
| H | 3.354376  | -0.055621 | 2.513207  | H      | -0.113580 | -3.872506 | -0.412486 |
| H | 4.816189  | -0.842594 | 3.146081  | H      | -0.074361 | -3.418249 | 3.867210  |
| H | 3.347549  | -3.661233 | 1.362808  | C      | 7.551601  | -0.195901 | 0.574220  |
| H | 3.906392  | -2.967835 | 2.882179  | H      | 6.860948  | 1.622132  | -0.374602 |
| H | 2.380826  | -2.422091 | 2.184107  | C      | 6.363281  | -2.207873 | -0.016299 |
| O | 2.428952  | 2.277759  | 0.069773  | H      | 4.743240  | -1.970661 | -1.427129 |

|   |           |           |           |      |           |           |           |
|---|-----------|-----------|-----------|------|-----------|-----------|-----------|
| H | -0.003723 | 2.860881  | 0.147896  | H    | -5.821904 | 0.227863  | -2.879411 |
| H | 1.105383  | 2.667847  | -1.310535 | C    | -3.462418 | 2.390468  | -1.478705 |
| H | 2.406718  | 4.103536  | 1.987372  | C    | -3.065324 | 0.702994  | -3.232543 |
| H | 1.040930  | 3.088925  | 2.447698  | H    | -4.048691 | 2.768904  | -0.643333 |
| H | 2.700404  | 2.537630  | 2.767133  | H    | -2.422513 | 2.358449  | -1.146292 |
| H | -0.296313 | -4.871947 | 1.850197  | H    | -3.543839 | 3.115453  | -2.300895 |
| C | 7.391308  | -1.582403 | 0.709282  | H    | -3.423873 | -0.152712 | -3.809392 |
| H | 8.350412  | 0.306391  | 1.115009  | H    | -3.088174 | 1.572057  | -3.903150 |
| H | 6.230054  | -3.284839 | 0.062705  | H    | -2.018724 | 0.532883  | -2.958129 |
| C | 8.306536  | -2.393631 | 1.597054  | O    | -2.011641 | 2.002723  | 1.260621  |
| H | 8.876596  | -3.127188 | 1.012803  | C    | -2.044252 | 2.223727  | 2.639019  |
| H | 9.023705  | -1.755546 | 2.123231  | H    | -1.078638 | 1.996546  | 3.136177  |
| H | 7.737067  | -2.952666 | 2.349997  | H    | -2.795861 | 1.586628  | 3.148604  |
| H | 0.423982  | 0.948189  | 2.252762  | C    | -2.384790 | 3.694482  | 2.918934  |
| C | -3.768604 | -2.085362 | -1.465940 | H    | -3.362353 | 3.952803  | 2.494934  |
| C | -2.464771 | -2.362693 | -2.252540 | H    | -2.413177 | 3.888479  | 4.000483  |
| C | -3.834737 | -3.162007 | -0.358097 | H    | -1.636780 | 4.355531  | 2.464735  |
| C | -4.957307 | -2.298408 | -2.427659 | H    | 4.232970  | 2.047237  | 0.760813  |
| H | -2.357820 | -1.747486 | -3.145433 | H    | 3.789307  | 3.291590  | -0.441054 |
| H | -1.582303 | -2.214136 | -1.628438 |      |           |           |           |
| H | -2.471196 | -3.411352 | -2.581004 |      |           |           |           |
| H | -4.790484 | -3.169397 | 0.170051  | TS20 |           |           |           |
| H | -3.719146 | -4.149926 | -0.824686 | Pd   | 1.243682  | 0.416938  | 0.285481  |
| H | -3.029329 | -3.048323 | 0.374213  | P    | 3.160906  | -1.267750 | -0.104016 |
| H | -4.952563 | -3.344515 | -2.766009 | C    | -1.199952 | 0.899193  | -0.452769 |
| H | -5.926500 | -2.111724 | -1.960387 | C    | -2.653507 | 1.024835  | -0.919350 |
| H | -4.884249 | -1.675471 | -3.322923 | C    | -0.345754 | 1.906484  | 0.310505  |
| H | -6.410005 | -1.865827 | 0.175384  | N    | -2.940842 | -0.393680 | -1.233495 |
| C | -6.433456 | -0.780837 | 0.306627  | H    | -3.289011 | 1.415455  | -0.108724 |
| C | -5.063813 | -0.193565 | 0.705356  | H    | -2.797160 | 1.633230  | -1.813745 |
| H | -6.834962 | -0.333703 | -0.606822 | C    | -0.001115 | 3.203135  | -0.319807 |
| H | -7.149879 | -0.571650 | 1.113640  | S    | -4.451799 | -0.871724 | -1.754001 |
| C | -4.569018 | -0.901834 | 1.991123  | C    | -2.105129 | -1.337711 | -0.442896 |
| C | -5.262779 | 1.292213  | 1.083110  | C    | -0.276301 | 3.506706  | -1.670825 |
| H | -3.623719 | -0.474859 | 2.340050  | C    | 0.626859  | 4.205901  | 0.451495  |
| H | -5.318361 | -0.754943 | 2.781362  | O    | -4.310961 | -2.277244 | -2.154483 |
| H | -4.429681 | -1.977152 | 1.870418  | O    | -4.913964 | 0.164730  | -2.682805 |
| H | -5.880471 | 1.336355  | 1.990734  | C    | -5.537038 | -0.829817 | -0.318518 |
| H | -4.308970 | 1.785234  | 1.287215  | C    | -1.073430 | -0.432174 | 0.237641  |
| H | -5.793623 | 1.853419  | 0.309883  | C    | 0.065775  | 4.743548  | -2.222556 |
| H | -6.074122 | 1.518427  | -1.694592 | H    | -0.771741 | 2.776033  | -2.302674 |
| C | -5.408428 | 1.158255  | -2.482457 | C    | 0.968543  | 5.439671  | -0.097935 |
| C | -3.947513 | 1.017863  | -2.002812 | H    | 0.857372  | 4.001975  | 1.492184  |
| H | -5.440142 | 1.901417  | -3.291791 | C    | -5.710401 | -1.981243 | 0.453786  |

|   |           |           |           |      |           |           |             |
|---|-----------|-----------|-----------|------|-----------|-----------|-------------|
| C | -6.182708 | 0.364063  | 0.025357  | H    | 3.499749  | 1.621194  | -0.880331   |
| C | -0.198388 | 0.258109  | -1.389797 | H    | 5.073376  | 1.635241  | -1.689327   |
| C | -0.953377 | -0.699404 | 1.731000  | H    | 3.750291  | 0.690475  | -2.372175   |
| C | 0.692724  | 5.718079  | -1.441774 | H    | 6.063910  | 1.204589  | 0.385128    |
| H | -0.166536 | 4.946004  | -3.265542 | H    | 4.544232  | 0.995708  | 1.278906    |
| H | 1.453589  | 6.187806  | 0.524638  | H    | 5.829980  | -0.248274 | 1.349449    |
| C | -6.525891 | -1.926975 | 1.587357  | H    | 5.809970  | -2.256071 | 1.462093    |
| H | -5.237411 | -2.910780 | 0.153274  | C    | 5.011367  | -2.999862 | 1.426328    |
| C | -6.991747 | 0.398978  | 1.160120  | C    | 3.605436  | -2.361493 | 1.444291    |
| H | -6.071123 | 1.241338  | -0.603900 | H    | 5.121053  | -3.632048 | 2.319074    |
| H | 0.575620  | 0.893299  | -1.833622 | H    | 5.178320  | -3.636710 | 0.554336    |
| H | -0.515361 | -0.540280 | -2.051071 | C    | 3.467379  | -1.481930 | 2.708062    |
| H | -0.540386 | -1.695547 | 1.923781  | C    | 2.569265  | -3.496275 | 1.608805    |
| H | -0.347361 | 0.026558  | 2.273227  | H    | 4.133261  | -0.620882 | 2.715414    |
| H | -1.970101 | -0.686982 | 2.160511  | H    | 2.447703  | -1.104113 | 2.816110    |
| H | 0.957097  | 6.681242  | -1.870664 | H    | 3.698479  | -2.100137 | 3.587101    |
| C | -7.175230 | -0.741576 | 1.960699  | H    | 2.685321  | -4.293015 | 0.870597    |
| H | -6.667608 | -2.825973 | 2.182815  | H    | 2.711745  | -3.951921 | 2.597968    |
| H | -7.498843 | 1.325103  | 1.422471  | H    | 1.539990  | -3.124594 | 1.566111    |
| C | -8.068784 | -0.688151 | 3.178137  | O    | 2.451191  | 1.446821  | 1.615869    |
| H | -7.766139 | 0.116931  | 3.858945  | C    | 1.963333  | 1.773764  | 2.880755    |
| H | -9.111500 | -0.496260 | 2.894340  | H    | 1.737200  | 0.872029  | 3.488336    |
| H | -8.042821 | -1.629401 | 3.736390  | H    | 1.016843  | 2.348340  | 2.839227    |
| H | -0.632598 | 2.027253  | 1.357206  | C    | 2.997120  | 2.615689  | 3.640432    |
| C | 2.803851  | -2.474740 | -1.599560 | H    | 3.221868  | 3.534985  | 3.086517    |
| C | 1.392075  | -3.085207 | -1.421324 | H    | 2.622026  | 2.888398  | 4.636935    |
| C | 2.751763  | -1.655392 | -2.910388 | H    | 3.933976  | 2.059748  | 3.765307    |
| C | 3.802747  | -3.635957 | -1.794830 | H    | -2.690498 | -1.841275 | 0.338763    |
| H | 1.338323  | -3.814395 | -0.612693 | H    | -1.706530 | -2.115812 | -1.099324   |
| H | 0.643857  | -2.313202 | -1.234671 |      |           |           |             |
| H | 1.116118  | -3.609211 | -2.346654 | Sub2 |           |           |             |
| H | 3.729319  | -1.281133 | -3.220061 | C    | 1.885715  | 0.672078  | 0.12456000  |
| H | 2.387060  | -2.308167 | -3.714840 | C    | 0.717882  | 1.443679  | 0.70813300  |
| H | 2.063783  | -0.807922 | -2.840372 | C    | 2.930264  | 0.356453  | 0.93053000  |
| H | 3.517798  | -4.195175 | -2.697499 | N    | -0.542186 | 0.977962  | 0.09243700  |
| H | 4.832037  | -3.298544 | -1.932264 | H    | 0.649239  | 1.301713  | 1.78685500  |
| H | 3.784195  | -4.345835 | -0.963888 | H    | 0.860337  | 2.521644  | 0.51459300  |
| H | 5.557770  | -1.259363 | -2.304094 | C    | 4.225022  | -0.255715 | 0.57757300  |
| C | 5.849006  | -0.913040 | -1.309212 | S    | -1.962052 | 1.450362  | 0.90472800  |
| C | 4.714686  | -0.178118 | -0.564069 | C    | -0.576190 | 1.185845  | -1.36315400 |
| H | 6.237963  | -1.767702 | -0.748616 | C    | 4.792350  | -1.203330 | 1.45301800  |
| H | 6.681847  | -0.209554 | -1.448101 | C    | 4.959716  | 0.103283  | -0.56935900 |
| C | 4.212389  | 1.002068  | -1.433641 | O    | -2.510134 | 2.696681  | 0.34139300  |
| C | 5.312986  | 0.469397  | 0.707093  | O    | -1.651993 | 1.366378  | 2.33865100  |



|   |           |           |             |   |           |           |             |
|---|-----------|-----------|-------------|---|-----------|-----------|-------------|
| C | 1.380723  | -1.085553 | -0.08477400 | C | -5.125588 | 0.428352  | -0.76717100 |
| C | -0.106964 | -1.361057 | -0.00171900 | H | -3.967624 | 1.244807  | 0.86608700  |
| C | 2.252043  | -2.122098 | -0.17306500 | H | 7.625628  | -2.164510 | -0.51822700 |
| N | -0.699212 | -0.414596 | 0.95832100  | C | -5.399741 | -0.691085 | -1.56740100 |
| H | -0.571669 | -1.239097 | -0.99698400 | H | -4.871772 | -2.750405 | -1.94084800 |
| H | -0.296674 | -2.374219 | 0.35327100  | H | -5.685563 | 1.347967  | -0.92167000 |
| C | 3.720960  | -2.091029 | -0.25266000 | C | -6.479282 | -0.644262 | -2.62319500 |
| S | -2.152245 | -0.859798 | 1.69731500  | H | -6.237962 | -1.292376 | -3.47268200 |
| C | -0.567888 | 0.996721  | 0.57821800  | H | -7.440260 | -0.985104 | -2.21478100 |
| C | 4.513615  | -1.163244 | 0.45230500  | H | -6.626896 | 0.372889  | -3.00128800 |
| C | 4.380645  | -3.067163 | -1.02732800 | H | 1.820245  | -3.122619 | -0.21733200 |
| O | -2.444524 | 0.198380  | 2.67046700  | C | 1.726537  | 0.324759  | -0.14784200 |
| O | -1.993323 | -2.262262 | 2.09446200  | H | 2.740058  | 0.588035  | -0.43410900 |
| C | -3.437711 | -0.800264 | 0.43732900  | H | -1.281138 | 1.268912  | -0.22275800 |
| C | 0.834501  | 1.314879  | 0.10231700  | H | -0.825749 | 1.593492  | 1.45515500  |
| C | 5.905977  | -1.189245 | 0.35295100  | C | 1.170959  | 2.744118  | -0.10147500 |
| H | 4.038734  | -0.445553 | 1.11392300  | C | 2.014577  | 3.135099  | -1.16116300 |
| C | 5.770830  | -3.089618 | -1.13088600 | C | 0.668797  | 3.753161  | 0.74365100  |
| H | 3.788590  | -3.807587 | -1.56123100 | C | 2.358688  | 4.472575  | -1.35420500 |
| C | -3.694107 | -1.932078 | -0.34279900 | H | 2.383218  | 2.382627  | -1.85264600 |
| C | -4.153939 | 0.382750  | 0.23367100  | C | 1.012366  | 5.092374  | 0.54941100  |
| C | 6.541369  | -2.145144 | -0.44461600 | H | 0.027407  | 3.495091  | 1.58111700  |
| H | 6.496240  | -0.468258 | 0.91322700  | C | 1.859585  | 5.459762  | -0.49884900 |
| H | 6.253965  | -3.847175 | -1.74306200 | H | 3.007629  | 4.745584  | -2.18267500 |
| C | -4.669131 | -1.867687 | -1.33830500 | H | 0.620024  | 5.848727  | 1.22456700  |
| H | -3.153763 | -2.854367 | -0.15483400 | H | 2.123598  | 6.503000  | -0.65134900 |
